# Supplementary material for: UVB mutagenesis differs in Nras- and Braf-mutant mouse models of melanoma
Source: Life Sci Alliance. 2021 Jul 1;4(9):e202101135. doi: 10.26508/lsa.202101135 (PMC8321651; doi:10.26508/lsa.202101135)
Supplement: Supplementary file 1 [file LSA-2021-01135_TableS1.xlsx]

## Sheet: Supp. Table S1
Table S1. Mutational calls for each tumor shown in Fig 2.
File	Genotype	UV	Sample	Location	Allele	Consequence	IMPACT	SYMBOL	Gene	Feature_type	Feature	BIOTYPE	EXON	INTRON	HGVSc	HGVSp	cDNA_position	CDS_position	Protein_position	Amino_acids	Codons	Existing_variation	DISTANCE	STRAND	FLAGS	SYMBOL_SOURCE	HGNC_ID	MANE	TSL	APPRIS	CCDS	ENSP	SWISSPROT	TREMBL	UNIPARC	SIFT	HGVS_OFFSET	CLIN_SIG	SOMATIC	PHENO	MOTIF_NAME	MOTIF_POS	HIGH_INF_POS	MOTIF_SCORE_CHANGE
TpB_NoUV_BPS10_VEP_ALL.xlsx	TpB	NoUV	BPS10	1:89888952-89888952	A	3_prime_UTR_variant	MODIFIER	Agap1	ENSMUSG00000055013	Transcript	ENSMUST00000027521.14	protein_coding	18 of 18	-	ENSMUST00000027521.14:c.*58C>A	-	3256	-	-	-	-	-	-	1	-	MGI	-	-	1	P4	CCDS15149.1	ENSMUSP00000027521	Q8BXK8	-	UPI00000EA66A	-	-	-	-	-	-	-	-	-
TpB_NoUV_BPS10_VEP_ALL.xlsx	TpB	NoUV	BPS10	10:80241698-80241698	C	intron_variant	MODIFIER	Pwwp3a	ENSMUSG00000020156	Transcript	ENSMUST00000020365.14	protein_coding	-	12 of 13	ENSMUST00000020365.14:c.1903-99T>C	-	-	-	-	-	-	-	-	1	-	MGI	-	-	1	P1	CCDS24014.1	ENSMUSP00000020365	Q6DID5	-	UPI00001E5101	-	-	-	-	-	-	-	-	-
TpB_NoUV_BPS10_VEP_ALL.xlsx	TpB	NoUV	BPS10	11:63889860-63889860	A	intron_variant	MODIFIER	Hs3st3b1	ENSMUSG00000070407	Transcript	ENSMUST00000094103.3	protein_coding	-	01 of 01	ENSMUST00000094103.3:c.555-115G>T	-	-	-	-	-	-	-	-	-1	-	MGI	-	-	1	P1	CCDS24838.1	ENSMUSP00000091647	Q9QZS6	-	UPI0000021964	-	-	-	-	-	-	-	-	-
TpB_NoUV_BPS10_VEP_ALL.xlsx	TpB	NoUV	BPS10	13:58846646-58846646	A	intron_variant	MODIFIER	Ntrk2	ENSMUSG00000055254	Transcript	ENSMUST00000079828.6	protein_coding	-	05 of 17	ENSMUST00000079828.6:c.429-54G>A	-	-	-	-	-	-	-	-	1	-	MGI	-	-	1	P1	CCDS26573.1	ENSMUSP00000078757	P15209	-	UPI0000021C47	-	-	-	-	-	-	-	-	-
TpB_NoUV_BPS10_VEP_ALL.xlsx	TpB	NoUV	BPS10	14:42436338-42436338	T	intron_variant	MODIFIER	Gm8005	ENSMUSG00000092148	Transcript	ENSMUST00000167326.1	protein_coding	-	03 of 04	ENSMUST00000167326.1:c.452-71G>A	-	-	-	-	-	-	-	-	-1	cds_start_NF	MGI	-	-	5	P1	-	ENSMUSP00000129153	-	F6YKY3	UPI0001F78F6B	-	-	-	-	-	-	-	-	-
TpB_NoUV_BPS10_VEP_ALL.xlsx	TpB	NoUV	BPS10	17:46428852-46428852	T	upstream_gene_variant	MODIFIER	Crip3	ENSMUSG00000023968	Transcript	ENSMUST00000024764.11	protein_coding	-	-	-	-	-	-	-	-	-	-	90	1	-	MGI	-	-	1	P1	CCDS28828.1	ENSMUSP00000024764	Q6Q6R3	Q14B40	UPI000002907D	-	-	-	-	-	-	-	-	-
TpB_NoUV_BPS10_VEP_ALL.xlsx	TpB	NoUV	BPS10	18:3008695-3008695	T	regulatory_region_variant	MODIFIER	-	-	RegulatoryFeature	ENSMUSR00000129554	-	-	-	-	-	-	-	-	-	-	-	-	-	-	-	-	-	-	-	-	-	-	-	-	-	-	-	-	-	-	-	-	-
TpB_NoUV_BPS10_VEP_ALL.xlsx	TpB	NoUV	BPS10	2:177481482-177481482	T	downstream_gene_variant	MODIFIER	Zfp970	ENSMUSG00000078866	Transcript	ENSMUST00000099002.9	protein_coding	-	-	-	-	-	-	-	-	-	-	3353	1	-	MGI	-	-	2	-	-	ENSMUSP00000096600	-	B1AYE1	UPI00001EF0D6	-	-	-	-	-	-	-	-	-
TpB_NoUV_BPS10_VEP_ALL.xlsx	TpB	NoUV	BPS10	3:116308049-116308049	T	intron_variant	MODIFIER	Cdc14a	ENSMUSG00000033502	Transcript	ENSMUST00000090464.6	protein_coding	-	11 of 15	ENSMUST00000090464.6:c.1137+91C>A	-	-	-	-	-	-	-	-	-1	-	MGI	-	-	1	P1	CCDS38611.1	ENSMUSP00000087950	Q6GQT0	-	UPI00001C2D6B	-	-	-	-	-	-	-	-	-
TpB_NoUV_BPS10_VEP_ALL.xlsx	TpB	NoUV	BPS10	4:147856213-147856213	A	downstream_gene_variant	MODIFIER	Miip	ENSMUSG00000029022	Transcript	ENSMUST00000030886.14	protein_coding	-	-	-	-	-	-	-	-	-	-	4565	-1	-	MGI	-	-	1	P2	CCDS18923.2	ENSMUSP00000030886	A2A7Y5	C0KL25	UPI000059E215	-	-	-	-	-	-	-	-	-
TpB_NoUV_BPS10_VEP_ALL.xlsx	TpB	NoUV	BPS10	5:113095808-113095808	G	intron_variant	MODIFIER	2900026A02Rik	ENSMUSG00000051339	Transcript	ENSMUST00000050125.8	protein_coding	-	03 of 07	ENSMUST00000050125.8:c.412-44T>C	-	-	-	-	-	-	-	-	-1	-	MGI	-	-	1	P3	CCDS39217.1	ENSMUSP00000058789	Q8BRV5	-	UPI000002759A	-	-	-	-	-	-	-	-	-
TpB_NoUV_BPS10_VEP_ALL.xlsx	TpB	NoUV	BPS10	6:145815471-145815471	T	synonymous_variant	LOW	Rassf8	ENSMUSG00000030259	Transcript	ENSMUST00000032388.4	protein_coding	02 of 04	-	ENSMUST00000032388.4:c.522G>T	ENSMUSP00000032388.4:p.Thr174%3D	599	522	174	T	acG/acT	-	-	1	-	MGI	-	-	1	P1	CCDS20696.1	ENSMUSP00000032388	Q8CJ96	-	UPI0000028FB6	-	-	-	-	-	-	-	-	-
TpB_NoUV_BPS10_VEP_ALL.xlsx	TpB	NoUV	BPS10	6:145815471-145815471	T	upstream_gene_variant	MODIFIER	Rassf8	ENSMUSG00000030259	Transcript	ENSMUST00000058538.6	protein_coding	-	-	-	-	-	-	-	-	-	-	4473	1	-	MGI	-	-	-	-	-	ENSMUSP00000130671	-	F7BB71	UPI00000247FB	-	-	-	-	-	-	-	-	-
TpB_NoUV_BPS10_VEP_ALL.xlsx	TpB	NoUV	BPS10	X:32092595-32092595	A	intergenic_variant	MODIFIER	-	-	-	-	-	-	-	-	-	-	-	-	-	-	-	-	-	-	-	-	-	-	-	-	-	-	-	-	-	-	-	-	-	-	-	-	-
TpB_NoUV_BPS16_VEP_ALL.xlsx	TpB	NoUV	BPS16	1:15269620-15269620	A	non_coding_transcript_exon_variant	MODIFIER	Gm10566	ENSMUSG00000073737	Transcript	ENSMUST00000086739.5	processed_pseudogene	01 of 01	-	ENSMUST00000086739.5:n.178G>T	-	178	-	-	-	-	-	-	-1	-	MGI	-	-	-	-	-	-	-	-	-	-	-	-	-	-	-	-	-	-
TpB_NoUV_BPS16_VEP_ALL.xlsx	TpB	NoUV	BPS16	1:85100855-85100855	T	downstream_gene_variant	MODIFIER	Gm10553	ENSMUSG00000073631	Transcript	ENSMUST00000097669.1	antisense	-	-	-	-	-	-	-	-	-	-	320	1	-	MGI	-	-	-	-	-	-	-	-	-	-	-	-	-	-	-	-	-	-
TpB_NoUV_BPS16_VEP_ALL.xlsx	TpB	NoUV	BPS16	1:180802866-180802866	A	3_prime_UTR_variant	MODIFIER	H3f3a	ENSMUSG00000060743	Transcript	ENSMUST00000081026.10	protein_coding	04 of 04	-	ENSMUST00000081026.10:c.*211G>T	-	719	-	-	-	-	-	-	-1	-	MGI	-	-	5	A1	-	ENSMUSP00000079816	-	F8WI35	UPI000035411A	-	-	-	-	-	-	-	-	-
TpB_NoUV_BPS16_VEP_ALL.xlsx	TpB	NoUV	BPS16	10:10986096-10986096	G	intron_variant	MODIFIER	Grm1	ENSMUSG00000019828	Transcript	ENSMUST00000044306.12	protein_coding	-	02 of 08	ENSMUST00000044306.12:c.701-49518A>C	-	-	-	-	-	-	-	-	-1	-	MGI	-	-	1	-	CCDS23696.1	ENSMUSP00000037255	P97772	-	UPI000002739B	-	-	-	-	-	-	-	-	-
TpB_NoUV_BPS16_VEP_ALL.xlsx	TpB	NoUV	BPS16	10:10986097-10986097	T	intron_variant	MODIFIER	Grm1	ENSMUSG00000019828	Transcript	ENSMUST00000044306.12	protein_coding	-	02 of 08	ENSMUST00000044306.12:c.701-49519G>A	-	-	-	-	-	-	-	-	-1	-	MGI	-	-	1	-	CCDS23696.1	ENSMUSP00000037255	P97772	-	UPI000002739B	-	-	-	-	-	-	-	-	-
TpB_NoUV_BPS16_VEP_ALL.xlsx	TpB	NoUV	BPS16	10:22383812-22383812	T	intergenic_variant	MODIFIER	-	-	-	-	-	-	-	-	-	-	-	-	-	-	-	-	-	-	-	-	-	-	-	-	-	-	-	-	-	-	-	-	-	-	-	-	-
TpB_NoUV_BPS16_VEP_ALL.xlsx	TpB	NoUV	BPS16	10:81317442-81317442	C	intron_variant	MODIFIER	Pip5k1c	ENSMUSG00000034902	Transcript	ENSMUST00000045469.14	protein_coding	-	18 of 18	ENSMUST00000045469.14:c.2061+39T>C	-	-	-	-	-	-	-	-	1	-	MGI	-	-	1	A2	CCDS78865.1	ENSMUSP00000038225	-	F8WHW6	UPI0000353F90	-	-	-	-	-	-	-	-	-
TpB_NoUV_BPS16_VEP_ALL.xlsx	TpB	NoUV	BPS16	11:36273451-36273451	T	synonymous_variant	LOW	Tenm2	ENSMUSG00000049336	Transcript	ENSMUST00000057207.5	protein_coding	05 of 29	-	ENSMUST00000057207.5:c.966G>A	ENSMUSP00000052014.5:p.Thr322%3D	966	966	322	T	acG/acA	-	-	-1	-	MGI	-	-	5	A1	-	ENSMUSP00000052014	-	A0A0A0MQ92	UPI0000020AAD	-	-	-	-	-	-	-	-	-
TpB_NoUV_BPS16_VEP_ALL.xlsx	TpB	NoUV	BPS16	11:36273451-36273451	T	upstream_gene_variant	MODIFIER	Gm12127	ENSMUSG00000086375	Transcript	ENSMUST00000123278.1	antisense	-	-	-	-	-	-	-	-	-	-	4590	1	-	MGI	-	-	3	-	-	-	-	-	-	-	-	-	-	-	-	-	-	-
TpB_NoUV_BPS16_VEP_ALL.xlsx	TpB	NoUV	BPS16	11:59493238-59493238	A	synonymous_variant	LOW	Zkscan17	ENSMUSG00000020472	Transcript	ENSMUST00000013262.14	protein_coding	08 of 10	-	ENSMUST00000013262.14:c.825C>T	ENSMUSP00000013262.8:p.Asn275%3D	1585	825	275	N	aaC/aaT	-	-	-1	-	MGI	-	-	1	P1	CCDS24770.1	ENSMUSP00000013262	Q5SXI5	-	UPI00001E5B5E	-	-	-	-	-	-	-	-	-
TpB_NoUV_BPS16_VEP_ALL.xlsx	TpB	NoUV	BPS16	12:89254629-89254629	G	intron_variant	MODIFIER	Nrxn3	ENSMUSG00000066392	Transcript	ENSMUST00000057634.13	protein_coding	-	04 of 19	ENSMUST00000057634.13:c.103-45T>G	-	-	-	-	-	-	-	-	1	-	MGI	-	-	1	-	CCDS49134.1	ENSMUSP00000050075	Q6P9K9	-	UPI000163E7D8	-	-	-	-	-	-	-	-	-
TpB_NoUV_BPS16_VEP_ALL.xlsx	TpB	NoUV	BPS16	12:112939320-112939320	A	splice_region_variant,synonymous_variant	LOW	Nudt14	ENSMUSG00000002804	Transcript	ENSMUST00000002881.4	protein_coding	02 of 05	-	ENSMUST00000002881.4:c.84C>T	ENSMUSP00000002881.4:p.Asp28%3D	130	84	28	D	gaC/gaT	-	-	-1	-	MGI	-	-	2	-	-	ENSMUSP00000002881	-	A0A217FL49	UPI0003D6DBF0	-	-	-	-	-	-	-	-	-
TpB_NoUV_BPS16_VEP_ALL.xlsx	TpB	NoUV	BPS16	12:112939320-112939320	A	splice_region_variant,non_coding_transcript_exon_variant	LOW	Nudt14	ENSMUSG00000002804	Transcript	ENSMUST00000222793.1	retained_intron	02 of 04	-	ENSMUST00000222793.1:n.100C>T	-	100	-	-	-	-	-	-	-1	-	MGI	-	-	3	-	-	-	-	-	-	-	-	-	-	-	-	-	-	-
TpB_NoUV_BPS16_VEP_ALL.xlsx	TpB	NoUV	BPS16	13:65931447-65931447	T	intergenic_variant	MODIFIER	-	-	-	-	-	-	-	-	-	-	-	-	-	-	-	-	-	-	-	-	-	-	-	-	-	-	-	-	-	-	-	-	-	-	-	-	-
TpB_NoUV_BPS16_VEP_ALL.xlsx	TpB	NoUV	BPS16	13:66144285-66144285	A	intergenic_variant	MODIFIER	-	-	-	-	-	-	-	-	-	-	-	-	-	-	-	-	-	-	-	-	-	-	-	-	-	-	-	-	-	-	-	-	-	-	-	-	-
TpB_NoUV_BPS16_VEP_ALL.xlsx	TpB	NoUV	BPS16	13:66433355-66433355	A	intron_variant	MODIFIER	2410141K09Rik	ENSMUSG00000074832	Transcript	ENSMUST00000091541.10	protein_coding	-	03 of 04	ENSMUST00000091541.10:c.191+63G>T	-	-	-	-	-	-	-	-	-1	-	MGI	-	-	5	-	-	ENSMUSP00000089126	-	Q8C1L2	UPI00000EA188	-	-	-	-	-	-	-	-	-
TpB_NoUV_BPS16_VEP_ALL.xlsx	TpB	NoUV	BPS16	14:31865788-31865788	A	intergenic_variant	MODIFIER	-	-	-	-	-	-	-	-	-	-	-	-	-	-	-	-	-	-	-	-	-	-	-	-	-	-	-	-	-	-	-	-	-	-	-	-	-
TpB_NoUV_BPS16_VEP_ALL.xlsx	TpB	NoUV	BPS16	14:43250987-43250987	G	non_coding_transcript_exon_variant	MODIFIER	Gm49146	ENSMUSG00000114544	Transcript	ENSMUST00000223745.1	processed_transcript	01 of 03	-	ENSMUST00000223745.1:n.398T>G	-	398	-	-	-	-	-	-	1	-	MGI	-	-	-	-	-	-	-	-	-	-	-	-	-	-	-	-	-	-
TpB_NoUV_BPS16_VEP_ALL.xlsx	TpB	NoUV	BPS16	15:23359649-23359649	T	intron_variant,non_coding_transcript_variant	MODIFIER	Cdh18	ENSMUSG00000040420	Transcript	ENSMUST00000040427.13	retained_intron	-	04 of 09	ENSMUST00000040427.13:n.1015-7204G>T	-	-	-	-	-	-	-	-	1	-	MGI	-	-	1	-	-	-	-	-	-	-	-	-	-	-	-	-	-	-
TpB_NoUV_BPS16_VEP_ALL.xlsx	TpB	NoUV	BPS16	15:23359670-23359670	T	intron_variant,non_coding_transcript_variant	MODIFIER	Cdh18	ENSMUSG00000040420	Transcript	ENSMUST00000040427.13	retained_intron	-	04 of 09	ENSMUST00000040427.13:n.1015-7183G>T	-	-	-	-	-	-	-	-	1	-	MGI	-	-	1	-	-	-	-	-	-	-	-	-	-	-	-	-	-	-
TpB_NoUV_BPS16_VEP_ALL.xlsx	TpB	NoUV	BPS16	16:32923189-32923189	G	intron_variant	MODIFIER	Lrch3	ENSMUSG00000022801	Transcript	ENSMUST00000023491.12	protein_coding	-	01 of 20	ENSMUST00000023491.12:c.262+8786A>G	-	-	-	-	-	-	-	-	1	-	MGI	-	-	1	P3	CCDS37315.1	ENSMUSP00000023491	Q8BVU0	-	UPI00001E37D0	-	-	-	-	-	-	-	-	-
TpB_NoUV_BPS16_VEP_ALL.xlsx	TpB	NoUV	BPS16	17:79103546-79103546	T	non_coding_transcript_exon_variant	MODIFIER	Gm49869	ENSMUSG00000117054	Transcript	ENSMUST00000232888.1	processed_pseudogene	01 of 01	-	ENSMUST00000232888.1:n.199C>A	-	199	-	-	-	-	-	-	-1	-	MGI	-	-	-	-	-	-	-	-	-	-	-	-	-	-	-	-	-	-
TpB_NoUV_BPS16_VEP_ALL.xlsx	TpB	NoUV	BPS16	19:7197584-7197584	A	downstream_gene_variant	MODIFIER	Otub1	ENSMUSG00000024767	Transcript	ENSMUST00000025679.10	protein_coding	-	-	-	-	-	-	-	-	-	-	618	-1	-	MGI	-	-	1	P1	CCDS29520.1	ENSMUSP00000025679	Q7TQI3	-	UPI000002888A	-	-	-	-	-	-	-	-	-
TpB_NoUV_BPS16_VEP_ALL.xlsx	TpB	NoUV	BPS16	19:7197584-7197584	A	missense_variant	MODERATE	Macrod1	ENSMUSG00000036278	Transcript	ENSMUST00000040261.6	protein_coding	09 of 11	-	ENSMUST00000040261.6:c.938G>A	ENSMUSP00000039507.5:p.Arg313Gln	1019	938	313	R/Q	cGg/cAg	-	-	1	-	MGI	-	-	1	P1	CCDS50376.1	ENSMUSP00000039507	Q922B1	-	UPI00001AA2AF	tolerated(0.35)	-	-	-	-	-	-	-	-
TpB_NoUV_BPS16_VEP_ALL.xlsx	TpB	NoUV	BPS16	19:40190701-40190701	G	upstream_gene_variant	MODIFIER	Cyp2c70	ENSMUSG00000060613	Transcript	ENSMUST00000051846.12	protein_coding	-	-	-	-	-	-	-	-	-	-	3415	-1	-	MGI	-	-	1	P1	CCDS37976.1	ENSMUSP00000060584	Q91W64	-	UPI00000E667F	-	-	-	-	-	-	-	-	-
TpB_NoUV_BPS16_VEP_ALL.xlsx	TpB	NoUV	BPS16	2:14319032-14319032	A	intron_variant	MODIFIER	Mrc1	ENSMUSG00000026712	Transcript	ENSMUST00000028045.3	protein_coding	-	23 of 29	ENSMUST00000028045.3:c.3248-69G>A	-	-	-	-	-	-	-	-	1	-	MGI	-	-	1	P1	CCDS15700.1	ENSMUSP00000028045	Q61830	Q2HZ94	UPI00000229B2	-	-	-	-	-	-	-	-	-
TpB_NoUV_BPS16_VEP_ALL.xlsx	TpB	NoUV	BPS16	2:120433664-120433664	G	non_coding_transcript_exon_variant	MODIFIER	Ganc	ENSMUSG00000062646	Transcript	ENSMUST00000043755.13	processed_transcript	11 of 24	-	ENSMUST00000043755.13:n.2253A>G	-	2253	-	-	-	-	-	-	1	-	MGI	-	-	1	-	-	-	-	-	-	-	-	-	-	-	-	-	-	-
TpB_NoUV_BPS16_VEP_ALL.xlsx	TpB	NoUV	BPS16	2:120433664-120433664	G	missense_variant	MODERATE	Ganc	ENSMUSG00000062646	Transcript	ENSMUST00000135074.1	protein_coding	11 of 24	-	ENSMUST00000135074.1:c.1097A>G	ENSMUSP00000116898.1:p.Gln366Arg	1360	1097	366	Q/R	cAg/cGg	-	-	1	-	MGI	-	-	2	P1	CCDS38211.1	ENSMUSP00000116898	-	A2AQJ8	UPI0000511FBF	-	-	-	-	-	-	-	-	-
TpB_NoUV_BPS16_VEP_ALL.xlsx	TpB	NoUV	BPS16	2:130654755-130654755	T	intron_variant	MODIFIER	Ddrgk1	ENSMUSG00000068290	Transcript	ENSMUST00000089559.10	protein_coding	-	07 of 08	ENSMUST00000089559.10:c.733-45G>A	-	-	-	-	-	-	-	-	-1	-	MGI	-	-	1	P1	CCDS38243.1	ENSMUSP00000086988	Q80WW9	-	UPI00001D4713	-	-	-	-	-	-	-	-	-
TpB_NoUV_BPS16_VEP_ALL.xlsx	TpB	NoUV	BPS16	3:91996490-91996490	G	intergenic_variant	MODIFIER	-	-	-	-	-	-	-	-	-	-	-	-	-	-	-	-	-	-	-	-	-	-	-	-	-	-	-	-	-	-	-	-	-	-	-	-	-
TpB_NoUV_BPS16_VEP_ALL.xlsx	TpB	NoUV	BPS16	4:146173880-146173880	G	intron_variant	MODIFIER	Zfp600	ENSMUSG00000066007	Transcript	ENSMUST00000092750.11	protein_coding	-	02 of 04	ENSMUST00000092750.11:c.-11+15429A>G	-	-	-	-	-	-	-	-	1	-	MGI	-	-	1	P1	CCDS51373.1	ENSMUSP00000090425	-	A2A7V0	UPI000059E208	-	-	-	-	-	-	-	-	-
TpB_NoUV_BPS16_VEP_ALL.xlsx	TpB	NoUV	BPS16	4:147403330-147403330	G	intergenic_variant	MODIFIER	-	-	-	-	-	-	-	-	-	-	-	-	-	-	-	-	-	-	-	-	-	-	-	-	-	-	-	-	-	-	-	-	-	-	-	-	-
TpB_NoUV_BPS16_VEP_ALL.xlsx	TpB	NoUV	BPS16	5:120606629-120606629	A	downstream_gene_variant	MODIFIER	Rita1	ENSMUSG00000029600	Transcript	ENSMUST00000031599.8	protein_coding	-	-	-	-	-	-	-	-	-	-	2429	-1	-	MGI	-	-	1	P1	CCDS51635.1	ENSMUSP00000031599	Q9D1H0	-	UPI0000023259	-	-	-	-	-	-	-	-	-
TpB_NoUV_BPS16_VEP_ALL.xlsx	TpB	NoUV	BPS16	5:149049647-149049647	A	intron_variant	MODIFIER	Hmgb1	ENSMUSG00000066551	Transcript	ENSMUST00000085546.12	protein_coding	-	04 of 04	ENSMUST00000085546.12:c.471+80C>T	-	-	-	-	-	-	-	-	-1	-	MGI	-	-	1	P1	CCDS19883.1	ENSMUSP00000082682	P63158	Q58EV5	UPI00000008A6	-	-	-	-	-	-	-	-	-
TpB_NoUV_BPS16_VEP_ALL.xlsx	TpB	NoUV	BPS16	6:83058657-83058657	A	synonymous_variant	LOW	Dqx1	ENSMUSG00000009145	Transcript	ENSMUST00000077502.4	protein_coding	02 of 12	-	ENSMUST00000077502.4:c.150G>A	ENSMUSP00000076708.2:p.Leu50%3D	524	150	50	L	ctG/ctA	-	-	1	-	MGI	-	-	5	P1	CCDS20268.1	ENSMUSP00000076708	Q924H9	-	UPI00000210FB	-	-	-	-	-	-	-	-	-
TpB_NoUV_BPS16_VEP_ALL.xlsx	TpB	NoUV	BPS16	6:83058657-83058657	A	upstream_gene_variant	MODIFIER	Htra2	ENSMUSG00000068329	Transcript	ENSMUST00000089645.12	protein_coding	-	-	-	-	-	-	-	-	-	-	4086	-1	-	MGI	-	-	1	P2	CCDS20267.1	ENSMUSP00000087073	Q9JIY5	-	UPI0000028679	-	-	-	-	-	-	-	-	-
TpB_NoUV_BPS16_VEP_ALL.xlsx	TpB	NoUV	BPS16	6:85319541-85319541	T	missense_variant	MODERATE	Sfxn5	ENSMUSG00000033720	Transcript	ENSMUST00000045846.11	protein_coding	02 of 14	-	ENSMUST00000045846.11:c.158G>A	ENSMUSP00000041872.5:p.Arg53Gln	165	158	53	R/Q	cGa/cAa	-	-	-1	-	MGI	-	-	1	P2	CCDS20291.1	ENSMUSP00000041872	Q925N0	-	UPI00000EBA0B	deleterious(0.01)	-	-	-	-	-	-	-	-
TpB_NoUV_BPS16_VEP_ALL.xlsx	TpB	NoUV	BPS16	6:85319541-85319541	T	synonymous_variant	LOW	Sfxn5	ENSMUSG00000033720	Transcript	ENSMUST00000113787.1	protein_coding	02 of 03	-	ENSMUST00000113787.1:c.492G>A	ENSMUSP00000109417.1:p.Ser164%3D	521	492	164	S	tcG/tcA	-	-	-1	-	MGI	-	-	2	-	-	ENSMUSP00000109417	-	D3YXH6	UPI00015AA458	-	-	-	-	-	-	-	-	-
TpB_NoUV_BPS16_VEP_ALL.xlsx	TpB	NoUV	BPS16	6:85319541-85319541	T	non_coding_transcript_exon_variant	MODIFIER	Sfxn5	ENSMUSG00000033720	Transcript	ENSMUST00000138489.1	processed_transcript	02 of 04	-	ENSMUST00000138489.1:n.145G>A	-	145	-	-	-	-	-	-	-1	-	MGI	-	-	1	-	-	-	-	-	-	-	-	-	-	-	-	-	-	-
TpB_NoUV_BPS16_VEP_ALL.xlsx	TpB	NoUV	BPS16	7:4943983-4943983	T	missense_variant	MODERATE	Ssc5d	ENSMUSG00000035279	Transcript	ENSMUST00000057612.8	protein_coding	14 of 14	-	ENSMUST00000057612.8:c.3335C>T	ENSMUSP00000052126.7:p.Thr1112Ile	3505	3335	1112	T/I	aCc/aTc	-	-	1	-	MGI	-	-	1	P1	CCDS20750.1	ENSMUSP00000052126	Q8BV57	-	UPI000002778C	deleterious_low_confidence(0.03)	-	-	-	-	-	-	-	-
TpB_NoUV_BPS16_VEP_ALL.xlsx	TpB	NoUV	BPS16	7:4943983-4943983	T	downstream_gene_variant	MODIFIER	Ssc5d	ENSMUSG00000035279	Transcript	ENSMUST00000207310.1	retained_intron	-	-	-	-	-	-	-	-	-	-	1116	1	-	MGI	-	-	2	-	-	-	-	-	-	-	-	-	-	-	-	-	-	-
TpB_NoUV_BPS16_VEP_ALL.xlsx	TpB	NoUV	BPS16	7:12797707-12797707	G	non_coding_transcript_exon_variant	MODIFIER	Gm45315	ENSMUSG00000109925	Transcript	ENSMUST00000209283.1	processed_pseudogene	01 of 01	-	ENSMUST00000209283.1:n.179A>G	-	179	-	-	-	-	-	-	1	-	MGI	-	-	-	-	-	-	-	-	-	-	-	-	-	-	-	-	-	-
TpB_NoUV_BPS16_VEP_ALL.xlsx	TpB	NoUV	BPS16	7:12797713-12797713	T	non_coding_transcript_exon_variant	MODIFIER	Gm45315	ENSMUSG00000109925	Transcript	ENSMUST00000209283.1	processed_pseudogene	01 of 01	-	ENSMUST00000209283.1:n.185C>T	-	185	-	-	-	-	-	-	1	-	MGI	-	-	-	-	-	-	-	-	-	-	-	-	-	-	-	-	-	-
TpB_NoUV_BPS16_VEP_ALL.xlsx	TpB	NoUV	BPS16	7:38442315-38442315	A	downstream_gene_variant	MODIFIER	Gm6605	ENSMUSG00000094920	Transcript	ENSMUST00000031488.10	unprocessed_pseudogene	-	-	-	-	-	-	-	-	-	-	4306	-1	-	MGI	-	-	-	-	-	-	-	-	-	-	-	-	-	-	-	-	-	-
TpB_NoUV_BPS16_VEP_ALL.xlsx	TpB	NoUV	BPS16	7:126992759-126992759	A	missense_variant	MODERATE	Mvp	ENSMUSG00000030681	Transcript	ENSMUST00000165096.8	protein_coding	09 of 15	-	ENSMUST00000165096.8:c.1258G>T	ENSMUSP00000127250.2:p.Asp420Tyr	1359	1258	420	D/Y	Gat/Tat	-	-	-1	-	MGI	-	-	1	P1	CCDS40136.2	ENSMUSP00000127250	-	E9Q3X0	UPI000056405C	tolerated(0.38)	-	-	-	-	-	-	-	-
TpB_NoUV_BPS16_VEP_ALL.xlsx	TpB	NoUV	BPS16	7:126992759-126992759	A	regulatory_region_variant	MODIFIER	-	-	RegulatoryFeature	ENSMUSR00000724015	-	-	-	-	-	-	-	-	-	-	-	-	-	-	-	-	-	-	-	-	-	-	-	-	-	-	-	-	-	-	-	-	-
TpB_NoUV_BPS16_VEP_ALL.xlsx	TpB	NoUV	BPS16	9:4432748-4432748	T	intron_variant	MODIFIER	Gria4	ENSMUSG00000025892	Transcript	ENSMUST00000027020.12	protein_coding	-	15 of 16	ENSMUST00000027020.12:c.2409+25G>A	-	-	-	-	-	-	-	-	-1	-	MGI	-	-	5	A1	CCDS52715.1	ENSMUSP00000027020	-	G5E863	UPI000002272A	-	-	-	-	-	-	-	-	-
TpB_NoUV_BPS16_VEP_ALL.xlsx	TpB	NoUV	BPS16	9:55149640-55149640	T	synonymous_variant	LOW	Ube2q2	ENSMUSG00000032307	Transcript	ENSMUST00000059555.14	protein_coding	01 of 13	-	ENSMUST00000059555.14:c.6C>T	ENSMUSP00000059798.8:p.Ser2%3D	787	6	2	S	tcC/tcT	-	-	1	-	MGI	-	-	1	P3	CCDS23201.1	ENSMUSP00000059798	Q8K2Z8	-	UPI00005ACA31	-	-	-	-	-	-	-	-	-
TpB_NoUV_BPS16_VEP_ALL.xlsx	TpB	NoUV	BPS16	9:55149640-55149640	T	upstream_gene_variant	MODIFIER	Ube2q2	ENSMUSG00000032307	Transcript	ENSMUST00000122441.1	protein_coding	-	-	-	-	-	-	-	-	-	-	443	1	-	MGI	-	-	1	-	CCDS85678.1	ENSMUSP00000112745	Q8K2Z8	-	UPI00000EA874	-	-	-	-	-	-	-	-	-
TpB_NoUV_BPS16_VEP_ALL.xlsx	TpB	NoUV	BPS16	9:55149652-55149652	T	synonymous_variant	LOW	Ube2q2	ENSMUSG00000032307	Transcript	ENSMUST00000059555.14	protein_coding	01 of 13	-	ENSMUST00000059555.14:c.18C>T	ENSMUSP00000059798.8:p.Leu6%3D	799	18	6	L	ctC/ctT	-	-	1	-	MGI	-	-	1	P3	CCDS23201.1	ENSMUSP00000059798	Q8K2Z8	-	UPI00005ACA31	-	-	-	-	-	-	-	-	-
TpB_NoUV_BPS16_VEP_ALL.xlsx	TpB	NoUV	BPS16	9:55149652-55149652	T	upstream_gene_variant	MODIFIER	Ube2q2	ENSMUSG00000032307	Transcript	ENSMUST00000122441.1	protein_coding	-	-	-	-	-	-	-	-	-	-	431	1	-	MGI	-	-	1	-	CCDS85678.1	ENSMUSP00000112745	Q8K2Z8	-	UPI00000EA874	-	-	-	-	-	-	-	-	-
TpB_NoUV_BPS16_VEP_ALL.xlsx	TpB	NoUV	BPS16	9:55149697-55149697	A	missense_variant	MODERATE	Ube2q2	ENSMUSG00000032307	Transcript	ENSMUST00000059555.14	protein_coding	01 of 13	-	ENSMUST00000059555.14:c.63C>A	ENSMUSP00000059798.8:p.His21Gln	844	63	21	H/Q	caC/caA	-	-	1	-	MGI	-	-	1	P3	CCDS23201.1	ENSMUSP00000059798	Q8K2Z8	-	UPI00005ACA31	deleterious(0)	-	-	-	-	-	-	-	-
TpB_NoUV_BPS16_VEP_ALL.xlsx	TpB	NoUV	BPS16	9:55149697-55149697	A	upstream_gene_variant	MODIFIER	Ube2q2	ENSMUSG00000032307	Transcript	ENSMUST00000122441.1	protein_coding	-	-	-	-	-	-	-	-	-	-	386	1	-	MGI	-	-	1	-	CCDS85678.1	ENSMUSP00000112745	Q8K2Z8	-	UPI00000EA874	-	-	-	-	-	-	-	-	-
TpB_NoUV_BPS16_VEP_ALL.xlsx	TpB	NoUV	BPS16	9:55149730-55149730	G	missense_variant	MODERATE	Ube2q2	ENSMUSG00000032307	Transcript	ENSMUST00000059555.14	protein_coding	01 of 13	-	ENSMUST00000059555.14:c.96C>G	ENSMUSP00000059798.8:p.Asp32Glu	877	96	32	D/E	gaC/gaG	-	-	1	-	MGI	-	-	1	P3	CCDS23201.1	ENSMUSP00000059798	Q8K2Z8	-	UPI00005ACA31	deleterious(0)	-	-	-	-	-	-	-	-
TpB_NoUV_BPS16_VEP_ALL.xlsx	TpB	NoUV	BPS16	9:55149730-55149730	G	upstream_gene_variant	MODIFIER	Ube2q2	ENSMUSG00000032307	Transcript	ENSMUST00000122441.1	protein_coding	-	-	-	-	-	-	-	-	-	-	353	1	-	MGI	-	-	1	-	CCDS85678.1	ENSMUSP00000112745	Q8K2Z8	-	UPI00000EA874	-	-	-	-	-	-	-	-	-
TpB_NoUV_BPS16_VEP_ALL.xlsx	TpB	NoUV	BPS16	X:135236150-135236150	C	upstream_gene_variant	MODIFIER	Gm15022	ENSMUSG00000081709	Transcript	ENSMUST00000122074.1	processed_pseudogene	-	-	-	-	-	-	-	-	-	-	4004	1	-	MGI	-	-	-	-	-	-	-	-	-	-	-	-	-	-	-	-	-	-
TpB_NoUV_BPS2_VEP_ALL.xlsx	TpB	NoUV	BPS2	1:85100855-85100855	T	downstream_gene_variant	MODIFIER	Gm10553	ENSMUSG00000073631	Transcript	ENSMUST00000097669.1	antisense	-	-	-	-	-	-	-	-	-	-	320	1	-	MGI	-	-	-	-	-	-	-	-	-	-	-	-	-	-	-	-	-	-
TpB_NoUV_BPS2_VEP_ALL.xlsx	TpB	NoUV	BPS2	1:88290999-88290999	A	intron_variant,non_coding_transcript_variant	MODIFIER	Trpm8	ENSMUSG00000036251	Transcript	ENSMUST00000148138.7	processed_transcript	-	01 of 05	ENSMUST00000148138.7:n.63-12284G>A	-	-	-	-	-	-	-	-	1	-	MGI	-	-	2	-	-	-	-	-	-	-	-	-	-	-	-	-	-	-
TpB_NoUV_BPS2_VEP_ALL.xlsx	TpB	NoUV	BPS2	1:144224663-144224663	A	upstream_gene_variant	MODIFIER	Rbm6-ps2	ENSMUSG00000100389	Transcript	ENSMUST00000186440.1	processed_pseudogene	-	-	-	-	-	-	-	-	-	-	1013	-1	-	MGI	-	-	-	-	-	-	-	-	-	-	-	-	-	-	-	-	-	-
TpB_NoUV_BPS2_VEP_ALL.xlsx	TpB	NoUV	BPS2	11:7213464-7213464	G	synonymous_variant	LOW	Igfbp3	ENSMUSG00000020427	Transcript	ENSMUST00000020702.10	protein_coding	01 of 05	-	ENSMUST00000020702.10:c.327G>C	ENSMUSP00000020702.4:p.Leu109%3D	434	327	109	L	ctG/ctC	-	-	-1	-	MGI	-	-	1	P1	CCDS24428.1	ENSMUSP00000020702	P47878	-	UPI0000192B41	-	-	-	-	-	-	-	-	-
TpB_NoUV_BPS2_VEP_ALL.xlsx	TpB	NoUV	BPS2	11:7213464-7213464	G	regulatory_region_variant	MODIFIER	-	-	RegulatoryFeature	ENSMUSR00000037680	-	-	-	-	-	-	-	-	-	-	-	-	-	-	-	-	-	-	-	-	-	-	-	-	-	-	-	-	-	-	-	-	-
TpB_NoUV_BPS2_VEP_ALL.xlsx	TpB	NoUV	BPS2	11:59493238-59493238	A	synonymous_variant	LOW	Zkscan17	ENSMUSG00000020472	Transcript	ENSMUST00000013262.14	protein_coding	08 of 10	-	ENSMUST00000013262.14:c.825C>T	ENSMUSP00000013262.8:p.Asn275%3D	1585	825	275	N	aaC/aaT	-	-	-1	-	MGI	-	-	1	P1	CCDS24770.1	ENSMUSP00000013262	Q5SXI5	-	UPI00001E5B5E	-	-	-	-	-	-	-	-	-
TpB_NoUV_BPS2_VEP_ALL.xlsx	TpB	NoUV	BPS2	13:61567978-61567978	G	intron_variant	MODIFIER	Cts3	ENSMUSG00000074870	Transcript	ENSMUST00000054702.8	protein_coding	-	04 of 07	ENSMUST00000054702.8:c.396+77T>C	-	-	-	-	-	-	-	-	-1	-	MGI	-	-	1	P1	CCDS36695.1	ENSMUSP00000058359	-	Q91ZD5	UPI0000021BF4	-	-	-	-	-	-	-	-	-
TpB_NoUV_BPS2_VEP_ALL.xlsx	TpB	NoUV	BPS2	13:61785872-61785872	A	intergenic_variant	MODIFIER	-	-	-	-	-	-	-	-	-	-	-	-	-	-	-	-	-	-	-	-	-	-	-	-	-	-	-	-	-	-	-	-	-	-	-	-	-
TpB_NoUV_BPS2_VEP_ALL.xlsx	TpB	NoUV	BPS2	13:61786112-61786112	G	intergenic_variant	MODIFIER	-	-	-	-	-	-	-	-	-	-	-	-	-	-	-	-	-	-	-	-	-	-	-	-	-	-	-	-	-	-	-	-	-	-	-	-	-
TpB_NoUV_BPS2_VEP_ALL.xlsx	TpB	NoUV	BPS2	13:62145970-62145970	G	intron_variant	MODIFIER	Zfp808	ENSMUSG00000074867	Transcript	ENSMUST00000099449.3	protein_coding	-	01 of 03	ENSMUST00000099449.3:c.3+15942T>G	-	-	-	-	-	-	-	-	1	-	MGI	-	-	1	P1	CCDS36696.1	ENSMUSP00000097048	-	B8JJZ4	UPI0000606E6C	-	-	-	-	-	-	-	-	-
TpB_NoUV_BPS2_VEP_ALL.xlsx	TpB	NoUV	BPS2	13:62146182-62146182	C	intron_variant	MODIFIER	Zfp808	ENSMUSG00000074867	Transcript	ENSMUST00000099449.3	protein_coding	-	01 of 03	ENSMUST00000099449.3:c.3+16154T>C	-	-	-	-	-	-	-	-	1	-	MGI	-	-	1	P1	CCDS36696.1	ENSMUSP00000097048	-	B8JJZ4	UPI0000606E6C	-	-	-	-	-	-	-	-	-
TpB_NoUV_BPS2_VEP_ALL.xlsx	TpB	NoUV	BPS2	13:65431209-65431209	G	intron_variant,non_coding_transcript_variant	MODIFIER	Vmn2r-ps96	ENSMUSG00000114065	Transcript	ENSMUST00000221218.1	unprocessed_pseudogene	-	03 of 05	ENSMUST00000221218.1:n.1273+105T>C	-	-	-	-	-	-	-	-	-1	-	MGI	-	-	-	-	-	-	-	-	-	-	-	-	-	-	-	-	-	-
TpB_NoUV_BPS2_VEP_ALL.xlsx	TpB	NoUV	BPS2	13:65549822-65549822	T	intron_variant,non_coding_transcript_variant	MODIFIER	Gm48166	ENSMUSG00000113618	Transcript	ENSMUST00000222230.1	lincRNA	-	01 of 01	ENSMUST00000222230.1:n.997+55336C>T	-	-	-	-	-	-	-	-	1	-	MGI	-	-	5	-	-	-	-	-	-	-	-	-	-	-	-	-	-	-
TpB_NoUV_BPS2_VEP_ALL.xlsx	TpB	NoUV	BPS2	13:65690641-65690641	T	non_coding_transcript_exon_variant	MODIFIER	Gm19428	ENSMUSG00000113260	Transcript	ENSMUST00000220512.1	transcribed_processed_pseudogene	03 of 03	-	ENSMUST00000220512.1:n.967T>A	-	967	-	-	-	-	-	-	-1	-	MGI	-	-	-	-	-	-	-	-	-	-	-	-	-	-	-	-	-	-
TpB_NoUV_BPS2_VEP_ALL.xlsx	TpB	NoUV	BPS2	13:65692938-65692938	G	non_coding_transcript_exon_variant	MODIFIER	Gm19428	ENSMUSG00000113260	Transcript	ENSMUST00000220512.1	transcribed_processed_pseudogene	01 of 03	-	ENSMUST00000220512.1:n.59G>C	-	59	-	-	-	-	-	-	-1	-	MGI	-	-	-	-	-	-	-	-	-	-	-	-	-	-	-	-	-	-
TpB_NoUV_BPS2_VEP_ALL.xlsx	TpB	NoUV	BPS2	13:65692944-65692944	G	non_coding_transcript_exon_variant	MODIFIER	Gm19428	ENSMUSG00000113260	Transcript	ENSMUST00000220512.1	transcribed_processed_pseudogene	01 of 03	-	ENSMUST00000220512.1:n.53A>C	-	53	-	-	-	-	-	-	-1	-	MGI	-	-	-	-	-	-	-	-	-	-	-	-	-	-	-	-	-	-
TpB_NoUV_BPS2_VEP_ALL.xlsx	TpB	NoUV	BPS2	13:65732669-65732669	C	non_coding_transcript_exon_variant	MODIFIER	Vmn2r-ps98	ENSMUSG00000117836	Transcript	ENSMUST00000224983.2	unprocessed_pseudogene	02 of 05	-	ENSMUST00000224983.2:n.663A>G	-	663	-	-	-	-	-	-	-1	-	MGI	-	-	-	-	-	-	-	-	-	-	-	-	-	-	-	-	-	-
TpB_NoUV_BPS2_VEP_ALL.xlsx	TpB	NoUV	BPS2	13:65904139-65904139	C	upstream_gene_variant	MODIFIER	Gm48218	ENSMUSG00000114625	Transcript	ENSMUST00000225676.1	processed_pseudogene	-	-	-	-	-	-	-	-	-	-	4084	1	-	MGI	-	-	-	-	-	-	-	-	-	-	-	-	-	-	-	-	-	-
TpB_NoUV_BPS2_VEP_ALL.xlsx	TpB	NoUV	BPS2	13:65904152-65904152	C	upstream_gene_variant	MODIFIER	Gm48218	ENSMUSG00000114625	Transcript	ENSMUST00000225676.1	processed_pseudogene	-	-	-	-	-	-	-	-	-	-	4071	1	-	MGI	-	-	-	-	-	-	-	-	-	-	-	-	-	-	-	-	-	-
TpB_NoUV_BPS2_VEP_ALL.xlsx	TpB	NoUV	BPS2	13:65904304-65904304	A	upstream_gene_variant	MODIFIER	Gm48218	ENSMUSG00000114625	Transcript	ENSMUST00000225676.1	processed_pseudogene	-	-	-	-	-	-	-	-	-	-	3919	1	-	MGI	-	-	-	-	-	-	-	-	-	-	-	-	-	-	-	-	-	-
TpB_NoUV_BPS2_VEP_ALL.xlsx	TpB	NoUV	BPS2	13:65945942-65945942	G	non_coding_transcript_exon_variant	MODIFIER	Vmn2r-ps100	ENSMUSG00000113723	Transcript	ENSMUST00000221238.2	unprocessed_pseudogene	02 of 04	-	ENSMUST00000221238.2:n.498T>G	-	498	-	-	-	-	-	-	1	-	MGI	-	-	-	-	-	-	-	-	-	-	-	-	-	-	-	-	-	-
TpB_NoUV_BPS2_VEP_ALL.xlsx	TpB	NoUV	BPS2	13:65948475-65948475	G	non_coding_transcript_exon_variant	MODIFIER	Vmn2r-ps100	ENSMUSG00000113723	Transcript	ENSMUST00000221238.2	unprocessed_pseudogene	04 of 04	-	ENSMUST00000221238.2:n.795C>G	-	795	-	-	-	-	-	-	1	-	MGI	-	-	-	-	-	-	-	-	-	-	-	-	-	-	-	-	-	-
TpB_NoUV_BPS2_VEP_ALL.xlsx	TpB	NoUV	BPS2	13:65950534-65950534	G	downstream_gene_variant	MODIFIER	Vmn2r-ps100	ENSMUSG00000113723	Transcript	ENSMUST00000221238.2	unprocessed_pseudogene	-	-	-	-	-	-	-	-	-	-	1952	1	-	MGI	-	-	-	-	-	-	-	-	-	-	-	-	-	-	-	-	-	-
TpB_NoUV_BPS2_VEP_ALL.xlsx	TpB	NoUV	BPS2	13:65950736-65950736	G	downstream_gene_variant	MODIFIER	Vmn2r-ps100	ENSMUSG00000113723	Transcript	ENSMUST00000221238.2	unprocessed_pseudogene	-	-	-	-	-	-	-	-	-	-	2154	1	-	MGI	-	-	-	-	-	-	-	-	-	-	-	-	-	-	-	-	-	-
TpB_NoUV_BPS2_VEP_ALL.xlsx	TpB	NoUV	BPS2	13:65956004-65956004	A	intergenic_variant	MODIFIER	-	-	-	-	-	-	-	-	-	-	-	-	-	-	-	-	-	-	-	-	-	-	-	-	-	-	-	-	-	-	-	-	-	-	-	-	-
TpB_NoUV_BPS2_VEP_ALL.xlsx	TpB	NoUV	BPS2	13:65956032-65956032	G	intergenic_variant	MODIFIER	-	-	-	-	-	-	-	-	-	-	-	-	-	-	-	-	-	-	-	-	-	-	-	-	-	-	-	-	-	-	-	-	-	-	-	-	-
TpB_NoUV_BPS2_VEP_ALL.xlsx	TpB	NoUV	BPS2	13:66119588-66119588	A	intron_variant	MODIFIER	Gm10324	ENSMUSG00000095909	Transcript	ENSMUST00000092528.5	protein_coding	-	01 of 03	ENSMUST00000092528.5:c.3+39T>A	-	-	-	-	-	-	-	-	1	-	MGI	-	-	5	P1	-	ENSMUSP00000090190	-	L7N208	UPI0001D16928	-	-	-	-	-	-	-	-	-
TpB_NoUV_BPS2_VEP_ALL.xlsx	TpB	NoUV	BPS2	13:66193919-66193919	T	intron_variant,non_coding_transcript_variant	MODIFIER	Vmn2r-ps102	ENSMUSG00000113350	Transcript	ENSMUST00000222577.2	transcribed_unprocessed_pseudogene	-	03 of 05	ENSMUST00000222577.2:n.756+59A>T	-	-	-	-	-	-	-	-	1	-	MGI	-	-	-	-	-	-	-	-	-	-	-	-	-	-	-	-	-	-
TpB_NoUV_BPS2_VEP_ALL.xlsx	TpB	NoUV	BPS2	13:66193922-66193922	C	intron_variant,non_coding_transcript_variant	MODIFIER	Vmn2r-ps102	ENSMUSG00000113350	Transcript	ENSMUST00000222577.2	transcribed_unprocessed_pseudogene	-	03 of 05	ENSMUST00000222577.2:n.756+62A>C	-	-	-	-	-	-	-	-	1	-	MGI	-	-	-	-	-	-	-	-	-	-	-	-	-	-	-	-	-	-
TpB_NoUV_BPS2_VEP_ALL.xlsx	TpB	NoUV	BPS2	13:66236441-66236441	C	upstream_gene_variant	MODIFIER	Gm48241	ENSMUSG00000113253	Transcript	ENSMUST00000222795.1	processed_pseudogene	-	-	-	-	-	-	-	-	-	-	4336	1	-	MGI	-	-	-	-	-	-	-	-	-	-	-	-	-	-	-	-	-	-
TpB_NoUV_BPS2_VEP_ALL.xlsx	TpB	NoUV	BPS2	13:66342841-66342841	C	non_coding_transcript_exon_variant	MODIFIER	C330022B21Rik	ENSMUSG00000114729	Transcript	ENSMUST00000224620.1	processed_pseudogene	01 of 01	-	ENSMUST00000224620.1:n.95T>G	-	95	-	-	-	-	-	-	-1	-	MGI	-	-	-	-	-	-	-	-	-	-	-	-	-	-	-	-	-	-
TpB_NoUV_BPS2_VEP_ALL.xlsx	TpB	NoUV	BPS2	13:66342844-66342844	G	non_coding_transcript_exon_variant	MODIFIER	C330022B21Rik	ENSMUSG00000114729	Transcript	ENSMUST00000224620.1	processed_pseudogene	01 of 01	-	ENSMUST00000224620.1:n.92T>C	-	92	-	-	-	-	-	-	-1	-	MGI	-	-	-	-	-	-	-	-	-	-	-	-	-	-	-	-	-	-
TpB_NoUV_BPS2_VEP_ALL.xlsx	TpB	NoUV	BPS2	13:66343195-66343195	G	upstream_gene_variant	MODIFIER	C330022B21Rik	ENSMUSG00000114729	Transcript	ENSMUST00000224620.1	processed_pseudogene	-	-	-	-	-	-	-	-	-	-	260	-1	-	MGI	-	-	-	-	-	-	-	-	-	-	-	-	-	-	-	-	-	-
TpB_NoUV_BPS2_VEP_ALL.xlsx	TpB	NoUV	BPS2	13:66351485-66351485	A	intron_variant,non_coding_transcript_variant	MODIFIER	Vmn2r-ps104	ENSMUSG00000094499	Transcript	ENSMUST00000099416.4	transcribed_unprocessed_pseudogene	-	04 of 04	ENSMUST00000099416.4:n.1426-86G>T	-	-	-	-	-	-	-	-	-1	-	MGI	-	-	5	-	-	-	-	-	-	-	-	-	-	-	-	-	-	-
TpB_NoUV_BPS2_VEP_ALL.xlsx	TpB	NoUV	BPS2	13:66351494-66351494	T	intron_variant,non_coding_transcript_variant	MODIFIER	Vmn2r-ps104	ENSMUSG00000094499	Transcript	ENSMUST00000099416.4	transcribed_unprocessed_pseudogene	-	04 of 04	ENSMUST00000099416.4:n.1426-95T>A	-	-	-	-	-	-	-	-	-1	-	MGI	-	-	5	-	-	-	-	-	-	-	-	-	-	-	-	-	-	-
TpB_NoUV_BPS2_VEP_ALL.xlsx	TpB	NoUV	BPS2	13:66488296-66488296	T	upstream_gene_variant	MODIFIER	Gm48323	ENSMUSG00000114406	Transcript	ENSMUST00000224488.1	processed_pseudogene	-	-	-	-	-	-	-	-	-	-	2651	1	-	MGI	-	-	-	-	-	-	-	-	-	-	-	-	-	-	-	-	-	-
TpB_NoUV_BPS2_VEP_ALL.xlsx	TpB	NoUV	BPS2	13:66625952-66625952	G	upstream_gene_variant	MODIFIER	Gm48361	ENSMUSG00000114814	Transcript	ENSMUST00000223830.1	processed_pseudogene	-	-	-	-	-	-	-	-	-	-	3047	-1	-	MGI	-	-	-	-	-	-	-	-	-	-	-	-	-	-	-	-	-	-
TpB_NoUV_BPS2_VEP_ALL.xlsx	TpB	NoUV	BPS2	13:66795008-66795008	C	upstream_gene_variant	MODIFIER	Gm48413	ENSMUSG00000114314	Transcript	ENSMUST00000224105.1	processed_pseudogene	-	-	-	-	-	-	-	-	-	-	4289	1	-	MGI	-	-	-	-	-	-	-	-	-	-	-	-	-	-	-	-	-	-
TpB_NoUV_BPS2_VEP_ALL.xlsx	TpB	NoUV	BPS2	13:66802278-66802278	A	downstream_gene_variant	MODIFIER	Gm48413	ENSMUSG00000114314	Transcript	ENSMUST00000224105.1	processed_pseudogene	-	-	-	-	-	-	-	-	-	-	2888	1	-	MGI	-	-	-	-	-	-	-	-	-	-	-	-	-	-	-	-	-	-
TpB_NoUV_BPS2_VEP_ALL.xlsx	TpB	NoUV	BPS2	13:66802297-66802297	T	downstream_gene_variant	MODIFIER	Gm48413	ENSMUSG00000114314	Transcript	ENSMUST00000224105.1	processed_pseudogene	-	-	-	-	-	-	-	-	-	-	2907	1	-	MGI	-	-	-	-	-	-	-	-	-	-	-	-	-	-	-	-	-	-
TpB_NoUV_BPS2_VEP_ALL.xlsx	TpB	NoUV	BPS2	13:66852521-66852521	A	non_coding_transcript_exon_variant	MODIFIER	Gm10323	ENSMUSG00000114816	Transcript	ENSMUST00000224898.1	processed_pseudogene	03 of 03	-	ENSMUST00000224898.1:n.546G>T	-	546	-	-	-	-	-	-	-1	-	MGI	-	-	-	-	-	-	-	-	-	-	-	-	-	-	-	-	-	-
TpB_NoUV_BPS2_VEP_ALL.xlsx	TpB	NoUV	BPS2	13:67181957-67181957	T	synonymous_variant	LOW	Rsl1	ENSMUSG00000058900	Transcript	ENSMUST00000021997.7	protein_coding	04 of 04	-	ENSMUST00000021997.7:c.468C>T	ENSMUSP00000021997.6:p.Phe156%3D	504	468	156	F	ttC/ttT	-	-	1	-	MGI	-	-	1	P1	CCDS26613.1	ENSMUSP00000021997	-	Q7M6Y1	UPI000021CAA2	-	-	-	-	-	-	-	-	-
TpB_NoUV_BPS2_VEP_ALL.xlsx	TpB	NoUV	BPS2	13:67181957-67181957	T	downstream_gene_variant	MODIFIER	Rsl1	ENSMUSG00000058900	Transcript	ENSMUST00000225334.1	nonsense_mediated_decay	-	-	-	-	-	-	-	-	-	-	145	1	-	MGI	-	-	-	-	-	ENSMUSP00000153578	-	A0A286YDU4	UPI000BAD5A12	-	-	-	-	-	-	-	-	-
TpB_NoUV_BPS2_VEP_ALL.xlsx	TpB	NoUV	BPS2	13:67711146-67711146	G	intron_variant	MODIFIER	Zfp65	ENSMUSG00000071281	Transcript	ENSMUST00000073157.14	protein_coding	-	01 of 03	ENSMUST00000073157.14:c.7-139T>C	-	-	-	-	-	-	-	-	-1	-	MGI	-	-	1	P1	CCDS49303.1	ENSMUSP00000072900	-	Q91W94	UPI00000292B6	-	-	-	-	-	-	-	-	-
TpB_NoUV_BPS2_VEP_ALL.xlsx	TpB	NoUV	BPS2	13:67711148-67711148	A	intron_variant	MODIFIER	Zfp65	ENSMUSG00000071281	Transcript	ENSMUST00000073157.14	protein_coding	-	01 of 03	ENSMUST00000073157.14:c.7-141A>T	-	-	-	-	-	-	-	-	-1	-	MGI	-	-	1	P1	CCDS49303.1	ENSMUSP00000072900	-	Q91W94	UPI00000292B6	-	-	-	-	-	-	-	-	-
TpB_NoUV_BPS2_VEP_ALL.xlsx	TpB	NoUV	BPS2	13:68195800-68195800	A	intergenic_variant	MODIFIER	-	-	-	-	-	-	-	-	-	-	-	-	-	-	-	-	-	-	-	-	-	-	-	-	-	-	-	-	-	-	-	-	-	-	-	-	-
TpB_NoUV_BPS2_VEP_ALL.xlsx	TpB	NoUV	BPS2	13:91479801-91479801	T	intron_variant	MODIFIER	Ssbp2	ENSMUSG00000003992	Transcript	ENSMUST00000004094.14	protein_coding	-	01 of 16	ENSMUST00000004094.14:c.62+18553G>T	-	-	-	-	-	-	-	-	1	-	MGI	-	-	1	P4	CCDS26677.1	ENSMUSP00000004094	Q9CYZ8	Q540I3	UPI00000054CD	-	-	-	-	-	-	-	-	-
TpB_NoUV_BPS2_VEP_ALL.xlsx	TpB	NoUV	BPS2	13:111764103-111764103	A	missense_variant	MODERATE	Map3k1	ENSMUSG00000021754	Transcript	ENSMUST00000109267.8	protein_coding	07 of 20	-	ENSMUST00000109267.8:c.1387C>T	ENSMUSP00000104890.2:p.His463Tyr	1411	1387	463	H/Y	Cac/Tac	-	-	-1	-	MGI	-	-	2	P1	CCDS26771.1	ENSMUSP00000104890	-	F8VQ72	UPI0000434AB7	deleterious(0)	-	-	-	-	-	-	-	-
TpB_NoUV_BPS2_VEP_ALL.xlsx	TpB	NoUV	BPS2	13:111764103-111764103	A	downstream_gene_variant	MODIFIER	Map3k1	ENSMUSG00000021754	Transcript	ENSMUST00000133364.1	processed_transcript	-	-	-	-	-	-	-	-	-	-	3506	-1	-	MGI	-	-	3	-	-	-	-	-	-	-	-	-	-	-	-	-	-	-
TpB_NoUV_BPS2_VEP_ALL.xlsx	TpB	NoUV	BPS2	13:119596765-119596765	T	intron_variant	MODIFIER	Tmem267	ENSMUSG00000074634	Transcript	ENSMUST00000099147.4	protein_coding	-	03 of 03	ENSMUST00000099147.4:c.*36-13672C>T	-	-	-	-	-	-	-	-	1	-	MGI	-	-	5	P1	CCDS56899.1	ENSMUSP00000096751	-	H3BJ86	UPI0001D134CD	-	-	-	-	-	-	-	-	-
TpB_NoUV_BPS2_VEP_ALL.xlsx	TpB	NoUV	BPS2	13:119596766-119596766	G	intron_variant	MODIFIER	Tmem267	ENSMUSG00000074634	Transcript	ENSMUST00000099147.4	protein_coding	-	03 of 03	ENSMUST00000099147.4:c.*36-13671A>G	-	-	-	-	-	-	-	-	1	-	MGI	-	-	5	P1	CCDS56899.1	ENSMUSP00000096751	-	H3BJ86	UPI0001D134CD	-	-	-	-	-	-	-	-	-
TpB_NoUV_BPS2_VEP_ALL.xlsx	TpB	NoUV	BPS2	14:43779134-43779134	T	downstream_gene_variant	MODIFIER	Gm8180	ENSMUSG00000091584	Transcript	ENSMUST00000163599.1	protein_coding	-	-	-	-	-	-	-	-	-	-	354	-1	-	MGI	-	-	5	P1	-	ENSMUSP00000131109	-	E9PXN0	UPI0000D670DF	-	-	-	-	-	-	-	-	-
TpB_NoUV_BPS2_VEP_ALL.xlsx	TpB	NoUV	BPS2	14:43779166-43779166	A	downstream_gene_variant	MODIFIER	Gm8180	ENSMUSG00000091584	Transcript	ENSMUST00000163599.1	protein_coding	-	-	-	-	-	-	-	-	-	-	322	-1	-	MGI	-	-	5	P1	-	ENSMUSP00000131109	-	E9PXN0	UPI0000D670DF	-	-	-	-	-	-	-	-	-
TpB_NoUV_BPS2_VEP_ALL.xlsx	TpB	NoUV	BPS2	14:43779186-43779186	T	downstream_gene_variant	MODIFIER	Gm8180	ENSMUSG00000091584	Transcript	ENSMUST00000163599.1	protein_coding	-	-	-	-	-	-	-	-	-	-	302	-1	-	MGI	-	-	5	P1	-	ENSMUSP00000131109	-	E9PXN0	UPI0000D670DF	-	-	-	-	-	-	-	-	-
TpB_NoUV_BPS2_VEP_ALL.xlsx	TpB	NoUV	BPS2	14:76636751-76636751	A	non_coding_transcript_exon_variant	MODIFIER	Fkbp1a-ps1	ENSMUSG00000115143	Transcript	ENSMUST00000227724.1	processed_pseudogene	01 of 01	-	ENSMUST00000227724.1:n.114C>T	-	114	-	-	-	-	-	-	-1	-	MGI	-	-	-	-	-	-	-	-	-	-	-	-	-	-	-	-	-	-
TpB_NoUV_BPS2_VEP_ALL.xlsx	TpB	NoUV	BPS2	14:76636858-76636858	C	non_coding_transcript_exon_variant	MODIFIER	Fkbp1a-ps1	ENSMUSG00000115143	Transcript	ENSMUST00000227724.1	processed_pseudogene	01 of 01	-	ENSMUST00000227724.1:n.7A>G	-	7	-	-	-	-	-	-	-1	-	MGI	-	-	-	-	-	-	-	-	-	-	-	-	-	-	-	-	-	-
TpB_NoUV_BPS2_VEP_ALL.xlsx	TpB	NoUV	BPS2	15:63864275-63864275	A	intron_variant	MODIFIER	Gsdmc3	ENSMUSG00000055827	Transcript	ENSMUST00000089894.5	protein_coding	-	03 of 10	ENSMUST00000089894.5:c.550-75G>T	-	-	-	-	-	-	-	-	-1	-	MGI	-	-	5	P1	CCDS37088.1	ENSMUSP00000087339	Q8CB12	-	UPI0000354B47	-	-	-	-	-	-	-	-	-
TpB_NoUV_BPS2_VEP_ALL.xlsx	TpB	NoUV	BPS2	16:4213044-4213044	A	intron_variant	MODIFIER	Crebbp	ENSMUSG00000022521	Transcript	ENSMUST00000023165.8	protein_coding	-	01 of 30	ENSMUST00000023165.8:c.85+95G>T	-	-	-	-	-	-	-	-	-1	-	MGI	-	-	1	P2	CCDS27915.1	ENSMUSP00000023165	-	F8VPR5	UPI0000021F26	-	-	-	-	-	-	-	-	-
TpB_NoUV_BPS2_VEP_ALL.xlsx	TpB	NoUV	BPS2	18:12506946-12506946	G	missense_variant	MODERATE	Lama3	ENSMUSG00000024421	Transcript	ENSMUST00000092070.12	protein_coding	39 of 75	-	ENSMUST00000092070.12:c.5015A>G	ENSMUSP00000089703.6:p.Asp1672Gly	5220	5015	1672	D/G	gAc/gGc	-	-	1	-	MGI	-	-	5	P1	CCDS50222.1	ENSMUSP00000089703	Q61789	-	UPI0000607DA8	deleterious(0)	-	-	-	-	-	-	-	-
TpB_NoUV_BPS2_VEP_ALL.xlsx	TpB	NoUV	BPS2	18:12506946-12506946	G	upstream_gene_variant	MODIFIER	Gm29200	ENSMUSG00000101406	Transcript	ENSMUST00000188118.1	antisense	-	-	-	-	-	-	-	-	-	-	2520	-1	-	MGI	-	-	1	-	-	-	-	-	-	-	-	-	-	-	-	-	-	-
TpB_NoUV_BPS2_VEP_ALL.xlsx	TpB	NoUV	BPS2	2:164100667-164100667	C	intron_variant	MODIFIER	Stk4	ENSMUSG00000018209	Transcript	ENSMUST00000018353.13	protein_coding	-	09 of 10	ENSMUST00000018353.13:c.1147+71T>C	-	-	-	-	-	-	-	-	1	-	MGI	-	-	1	P1	CCDS17021.1	ENSMUSP00000018353	Q9JI11	-	UPI0000021596	-	-	-	-	-	-	-	-	-
TpB_NoUV_BPS2_VEP_ALL.xlsx	TpB	NoUV	BPS2	2:177481497-177481497	A	downstream_gene_variant	MODIFIER	Zfp970	ENSMUSG00000078866	Transcript	ENSMUST00000099002.9	protein_coding	-	-	-	-	-	-	-	-	-	-	3368	1	-	MGI	-	-	2	-	-	ENSMUSP00000096600	-	B1AYE1	UPI00001EF0D6	-	-	-	-	-	-	-	-	-
TpB_NoUV_BPS2_VEP_ALL.xlsx	TpB	NoUV	BPS2	4:147199754-147199754	G	upstream_gene_variant	MODIFIER	Gm13163	ENSMUSG00000082176	Transcript	ENSMUST00000119875.1	processed_pseudogene	-	-	-	-	-	-	-	-	-	-	4543	-1	-	MGI	-	-	-	-	-	-	-	-	-	-	-	-	-	-	-	-	-	-
TpB_NoUV_BPS2_VEP_ALL.xlsx	TpB	NoUV	BPS2	5:14910767-14910767	G	intron_variant	MODIFIER	Gm9758	ENSMUSG00000033219	Transcript	ENSMUST00000035980.8	protein_coding	-	04 of 04	ENSMUST00000035980.8:c.625-173T>C	-	-	-	-	-	-	-	-	-1	-	MGI	-	-	1	P1	CCDS51416.1	ENSMUSP00000041597	-	Q80ZT2	UPI000000BC72	-	-	-	-	-	-	-	-	-
TpB_NoUV_BPS2_VEP_ALL.xlsx	TpB	NoUV	BPS2	5:108344212-108344212	A	intron_variant	MODIFIER	Pigg	ENSMUSG00000029263	Transcript	ENSMUST00000031189.13	protein_coding	-	11 of 12	ENSMUST00000031189.13:c.2551-12T>A	-	-	-	-	-	-	-	-	1	-	MGI	-	-	5	P3	CCDS39203.1	ENSMUSP00000031189	-	D3Z4I0	UPI0000605073	-	-	-	-	-	-	-	-	-
TpB_NoUV_BPS2_VEP_ALL.xlsx	TpB	NoUV	BPS2	6:106742633-106742633	T	intron_variant	MODIFIER	Il5ra	ENSMUSG00000005364	Transcript	ENSMUST00000167925.2	protein_coding	-	03 of 10	ENSMUST00000167925.2:c.219+19G>A	-	-	-	-	-	-	-	-	-1	-	MGI	-	-	5	P1	CCDS20396.1	ENSMUSP00000129781	P21183	Q05A81	UPI0000028472	-	-	-	-	-	-	-	-	-
TpB_NoUV_BPS2_VEP_ALL.xlsx	TpB	NoUV	BPS2	6:139500728-139500728	G	synonymous_variant	LOW	Rergl	ENSMUSG00000092164	Transcript	ENSMUST00000170650.2	protein_coding	02 of 05	-	ENSMUST00000170650.2:c.102T>C	ENSMUSP00000131303.1:p.Ser34%3D	204	102	34	S	tcT/tcC	-	-	-1	-	MGI	-	-	1	P1	CCDS51946.1	ENSMUSP00000131303	-	B2RVE2	UPI0000D6640A	-	-	-	-	-	-	-	-	-
TpB_NoUV_BPS2_VEP_ALL.xlsx	TpB	NoUV	BPS2	7:41191701-41191701	G	non_coding_transcript_exon_variant	MODIFIER	Gm5896	ENSMUSG00000099979	Transcript	ENSMUST00000189662.1	processed_pseudogene	01 of 01	-	ENSMUST00000189662.1:n.589A>G	-	589	-	-	-	-	-	-	1	-	MGI	-	-	-	-	-	-	-	-	-	-	-	-	-	-	-	-	-	-
TpB_NoUV_BPS2_VEP_ALL.xlsx	TpB	NoUV	BPS2	7:122180927-122180927	T	missense_variant	MODERATE	Ern2	ENSMUSG00000030866	Transcript	ENSMUST00000033153.8	protein_coding	07 of 22	-	ENSMUST00000033153.8:c.527G>A	ENSMUSP00000033153.7:p.Arg176Gln	579	527	176	R/Q	cGg/cAg	-	-	-1	-	MGI	-	-	1	P1	CCDS21813.1	ENSMUSP00000033153	Q9Z2E3	-	UPI000024DF6B	deleterious(0.01)	-	-	-	-	-	-	-	-
TpB_NoUV_BPS2_VEP_ALL.xlsx	TpB	NoUV	BPS2	8:20297184-20297184	A	intron_variant,non_coding_transcript_variant	MODIFIER	6820431F20Rik	ENSMUSG00000071796	Transcript	ENSMUST00000153748.1	processed_transcript	-	01 of 04	ENSMUST00000153748.1:n.109+140G>T	-	-	-	-	-	-	-	-	-1	-	MGI	-	-	1	-	-	-	-	-	-	-	-	-	-	-	-	-	-	-
TpB_NoUV_BPS2_VEP_ALL.xlsx	TpB	NoUV	BPS2	8:40789091-40789091	C	upstream_gene_variant	MODIFIER	Adam20	ENSMUSG00000046282	Transcript	ENSMUST00000056331.7	protein_coding	-	-	-	-	-	-	-	-	-	-	4182	1	-	MGI	-	-	1	P1	CCDS40325.1	ENSMUSP00000057794	-	Q7M763	UPI00001D9636	-	-	-	-	-	-	-	-	-
TpB_NoUV_BPS2_VEP_ALL.xlsx	TpB	NoUV	BPS2	9:65507510-65507510	C	intron_variant	MODIFIER	Ankdd1a	ENSMUSG00000066510	Transcript	ENSMUST00000061766.5	protein_coding	-	08 of 13	ENSMUST00000061766.5:c.807+106C>G	-	-	-	-	-	-	-	-	-1	-	MGI	-	-	5	A2	-	ENSMUSP00000057040	-	F8VQ39	UPI0001F7913B	-	-	-	-	-	-	-	-	-
TpB_NoUV_BPS2_VEP_ALL.xlsx	TpB	NoUV	BPS2	X:9987607-9987607	A	intron_variant	MODIFIER	Sytl5	ENSMUSG00000054453	Transcript	ENSMUST00000067529.8	protein_coding	-	14 of 16	ENSMUST00000067529.8:c.1774+703C>A	-	-	-	-	-	-	-	-	1	-	MGI	-	-	1	P3	CCDS40860.1	ENSMUSP00000064826	Q80T23	A2AF58	UPI00000023B3	-	-	-	-	-	-	-	-	-
TpB_NoUV_BPS2_VEP_ALL.xlsx	TpB	NoUV	BPS2	X:114592372-114592372	A	non_coding_transcript_exon_variant	MODIFIER	Gm1866	ENSMUSG00000082070	Transcript	ENSMUST00000120701.1	processed_pseudogene	01 of 01	-	ENSMUST00000120701.1:n.153A>T	-	153	-	-	-	-	-	-	-1	-	MGI	-	-	-	-	-	-	-	-	-	-	-	-	-	-	-	-	-	-
TpB_NoUV_BPS2_VEP_ALL.xlsx	TpB	NoUV	BPS2	X:169978744-169978744	G	intron_variant	MODIFIER	Mid1	ENSMUSG00000035299	Transcript	ENSMUST00000036753.11	protein_coding	-	04 of 09	ENSMUST00000036753.11:c.864+1715A>G	-	-	-	-	-	-	-	-	1	-	MGI	-	-	5	P1	CCDS41215.1	ENSMUSP00000038765	O70583	-	UPI000019349A	-	-	-	-	-	-	-	-	-
TpB_NoUV_BPS2_VEP_ALL.xlsx	TpB	NoUV	BPS2	Y:90761322-90761322	A	intron_variant,non_coding_transcript_variant	MODIFIER	Mid1-ps1	ENSMUSG00000095134	Transcript	ENSMUST00000167967.3	unprocessed_pseudogene	-	05 of 06	ENSMUST00000167967.3:n.691+708G>A	-	-	-	-	-	-	-	-	1	-	MGI	-	-	-	-	-	-	-	-	-	-	-	-	-	-	-	-	-	-
TpB_NoUV_BPS24_VEP_ALL.xlsx	TpB	NoUV	BPS24	1:85100855-85100855	T	downstream_gene_variant	MODIFIER	Gm10553	ENSMUSG00000073631	Transcript	ENSMUST00000097669.1	antisense	-	-	-	-	-	-	-	-	-	-	320	1	-	MGI	-	-	-	-	-	-	-	-	-	-	-	-	-	-	-	-	-	-
TpB_NoUV_BPS24_VEP_ALL.xlsx	TpB	NoUV	BPS24	1:85280548-85280548	T	intron_variant,non_coding_transcript_variant	MODIFIER	Gm16026	ENSMUSG00000079455	Transcript	ENSMUST00000159695.1	transcribed_unprocessed_pseudogene	-	03 of 06	ENSMUST00000159695.1:n.394+639C>T	-	-	-	-	-	-	-	-	1	-	MGI	-	-	-	-	-	-	-	-	-	-	-	-	-	-	-	-	-	-
TpB_NoUV_BPS24_VEP_ALL.xlsx	TpB	NoUV	BPS24	1:85589536-85589536	G	intron_variant	MODIFIER	Sp110	ENSMUSG00000070034	Transcript	ENSMUST00000093508.6	protein_coding	-	04 of 11	ENSMUST00000093508.6:c.584-345T>C	-	-	-	-	-	-	-	-	-1	-	MGI	-	-	1	P1	CCDS35637.1	ENSMUSP00000091226	Q8BVK9	-	UPI00000EA8D4	-	-	-	-	-	-	-	-	-
TpB_NoUV_BPS24_VEP_ALL.xlsx	TpB	NoUV	BPS24	1:88215383-88215383	A	intron_variant	MODIFIER	Ugt1a6a	ENSMUSG00000054545	Transcript	ENSMUST00000014263.5	protein_coding	-	02 of 04	ENSMUST00000014263.5:c.990+208C>A	-	-	-	-	-	-	-	-	1	-	MGI	-	-	1	P1	CCDS48314.1	ENSMUSP00000014263	Q64435	-	UPI0000021303	-	-	-	-	-	-	-	-	-
TpB_NoUV_BPS24_VEP_ALL.xlsx	TpB	NoUV	BPS24	13:66433355-66433355	A	intron_variant	MODIFIER	2410141K09Rik	ENSMUSG00000074832	Transcript	ENSMUST00000091541.10	protein_coding	-	03 of 04	ENSMUST00000091541.10:c.191+63G>T	-	-	-	-	-	-	-	-	-1	-	MGI	-	-	5	-	-	ENSMUSP00000089126	-	Q8C1L2	UPI00000EA188	-	-	-	-	-	-	-	-	-
TpB_NoUV_BPS24_VEP_ALL.xlsx	TpB	NoUV	BPS24	13:66488296-66488296	T	upstream_gene_variant	MODIFIER	Gm48323	ENSMUSG00000114406	Transcript	ENSMUST00000224488.1	processed_pseudogene	-	-	-	-	-	-	-	-	-	-	2651	1	-	MGI	-	-	-	-	-	-	-	-	-	-	-	-	-	-	-	-	-	-
TpB_NoUV_BPS24_VEP_ALL.xlsx	TpB	NoUV	BPS24	14:43779122-43779122	T	downstream_gene_variant	MODIFIER	Gm8180	ENSMUSG00000091584	Transcript	ENSMUST00000163599.1	protein_coding	-	-	-	-	-	-	-	-	-	-	366	-1	-	MGI	-	-	5	P1	-	ENSMUSP00000131109	-	E9PXN0	UPI0000D670DF	-	-	-	-	-	-	-	-	-
TpB_NoUV_BPS24_VEP_ALL.xlsx	TpB	NoUV	BPS24	14:43779134-43779134	T	downstream_gene_variant	MODIFIER	Gm8180	ENSMUSG00000091584	Transcript	ENSMUST00000163599.1	protein_coding	-	-	-	-	-	-	-	-	-	-	354	-1	-	MGI	-	-	5	P1	-	ENSMUSP00000131109	-	E9PXN0	UPI0000D670DF	-	-	-	-	-	-	-	-	-
TpB_NoUV_BPS24_VEP_ALL.xlsx	TpB	NoUV	BPS24	14:43779151-43779151	A	downstream_gene_variant	MODIFIER	Gm8180	ENSMUSG00000091584	Transcript	ENSMUST00000163599.1	protein_coding	-	-	-	-	-	-	-	-	-	-	337	-1	-	MGI	-	-	5	P1	-	ENSMUSP00000131109	-	E9PXN0	UPI0000D670DF	-	-	-	-	-	-	-	-	-
TpB_NoUV_BPS24_VEP_ALL.xlsx	TpB	NoUV	BPS24	14:43779166-43779166	A	downstream_gene_variant	MODIFIER	Gm8180	ENSMUSG00000091584	Transcript	ENSMUST00000163599.1	protein_coding	-	-	-	-	-	-	-	-	-	-	322	-1	-	MGI	-	-	5	P1	-	ENSMUSP00000131109	-	E9PXN0	UPI0000D670DF	-	-	-	-	-	-	-	-	-
TpB_NoUV_BPS24_VEP_ALL.xlsx	TpB	NoUV	BPS24	14:43779186-43779186	T	downstream_gene_variant	MODIFIER	Gm8180	ENSMUSG00000091584	Transcript	ENSMUST00000163599.1	protein_coding	-	-	-	-	-	-	-	-	-	-	302	-1	-	MGI	-	-	5	P1	-	ENSMUSP00000131109	-	E9PXN0	UPI0000D670DF	-	-	-	-	-	-	-	-	-
TpB_NoUV_BPS24_VEP_ALL.xlsx	TpB	NoUV	BPS24	18:3008695-3008695	T	regulatory_region_variant	MODIFIER	-	-	RegulatoryFeature	ENSMUSR00000129554	-	-	-	-	-	-	-	-	-	-	-	-	-	-	-	-	-	-	-	-	-	-	-	-	-	-	-	-	-	-	-	-	-
TpB_NoUV_BPS24_VEP_ALL.xlsx	TpB	NoUV	BPS24	7:100174297-100174297	T	upstream_gene_variant	MODIFIER	Kcne3	ENSMUSG00000035165	Transcript	ENSMUST00000049333.12	protein_coding	-	-	-	-	-	-	-	-	-	-	4400	1	-	MGI	-	-	1	P1	CCDS21495.1	ENSMUSP00000039353	Q9WTW2	Q545H9	UPI0000001869	-	-	-	-	-	-	-	-	-
TpB_NoUV_BPS4_VEP_ALL.xlsx	TpB	NoUV	BPS4	1:5466695-5466695	G	intergenic_variant	MODIFIER	-	-	-	-	-	-	-	-	-	-	-	-	-	-	-	-	-	-	-	-	-	-	-	-	-	-	-	-	-	-	-	-	-	-	-	-	-
TpB_NoUV_BPS4_VEP_ALL.xlsx	TpB	NoUV	BPS4	1:25531943-25531943	A	synonymous_variant	LOW	Adgrb3	ENSMUSG00000033569	Transcript	ENSMUST00000041838.6	protein_coding	06 of 30	-	ENSMUST00000041838.6:c.1452C>T	ENSMUSP00000035612.6:p.Gly484%3D	1452	1452	484	G	ggC/ggT	-	-	-1	-	MGI	-	-	1	P1	CCDS14855.1	ENSMUSP00000035612	Q80ZF8	-	UPI00001ECF80	-	-	-	-	-	-	-	-	-
TpB_NoUV_BPS4_VEP_ALL.xlsx	TpB	NoUV	BPS4	1:25531943-25531943	A	non_coding_transcript_exon_variant	MODIFIER	Adgrb3	ENSMUSG00000033569	Transcript	ENSMUST00000189254.1	retained_intron	06 of 09	-	ENSMUST00000189254.1:n.1039C>T	-	1039	-	-	-	-	-	-	-1	-	MGI	-	-	5	-	-	-	-	-	-	-	-	-	-	-	-	-	-	-
TpB_NoUV_BPS4_VEP_ALL.xlsx	TpB	NoUV	BPS4	1:85100855-85100855	T	downstream_gene_variant	MODIFIER	Gm10553	ENSMUSG00000073631	Transcript	ENSMUST00000097669.1	antisense	-	-	-	-	-	-	-	-	-	-	320	1	-	MGI	-	-	-	-	-	-	-	-	-	-	-	-	-	-	-	-	-	-
TpB_NoUV_BPS4_VEP_ALL.xlsx	TpB	NoUV	BPS4	1:85614566-85614566	A	intron_variant	MODIFIER	Sp140	ENSMUSG00000070031	Transcript	ENSMUST00000080204.10	protein_coding	-	03 of 16	ENSMUST00000080204.10:c.368-238G>A	-	-	-	-	-	-	-	-	1	-	MGI	-	-	1	P1	CCDS35638.1	ENSMUSP00000079095	-	Q6NSQ5	UPI000035EB00	-	-	-	-	-	-	-	-	-
TpB_NoUV_BPS4_VEP_ALL.xlsx	TpB	NoUV	BPS4	10:75897078-75897078	A	missense_variant	MODERATE	Smarcb1	ENSMUSG00000000902	Transcript	ENSMUST00000000925.9	protein_coding	09 of 09	-	ENSMUST00000000925.9:c.1129C>T	ENSMUSP00000000925.3:p.Arg377Cys	1351	1129	377	R/C	Cgt/Tgt	-	-	-1	-	MGI	-	-	1	P3	CCDS23936.1	ENSMUSP00000000925	Q9Z0H3	Q6ZWP4	UPI00000019FA	deleterious(0)	-	-	-	-	-	-	-	-
TpB_NoUV_BPS4_VEP_ALL.xlsx	TpB	NoUV	BPS4	10:75897078-75897078	A	downstream_gene_variant	MODIFIER	Derl3	ENSMUSG00000009092	Transcript	ENSMUST00000009236.5	protein_coding	-	-	-	-	-	-	-	-	-	-	1137	1	-	MGI	-	-	1	P2	CCDS23935.1	ENSMUSP00000009236	Q9D8K3	Q14C34	UPI000002757C	-	-	-	-	-	-	-	-	-
TpB_NoUV_BPS4_VEP_ALL.xlsx	TpB	NoUV	BPS4	10:100302936-100302936	C	downstream_gene_variant	MODIFIER	Gm9476	ENSMUSG00000112069	Transcript	ENSMUST00000179109.2	unprocessed_pseudogene	-	-	-	-	-	-	-	-	-	-	3562	-1	-	MGI	-	-	-	-	-	-	-	-	-	-	-	-	-	-	-	-	-	-
TpB_NoUV_BPS4_VEP_ALL.xlsx	TpB	NoUV	BPS4	12:22094608-22094608	C	intergenic_variant	MODIFIER	-	-	-	-	-	-	-	-	-	-	-	-	-	-	-	-	-	-	-	-	-	-	-	-	-	-	-	-	-	-	-	-	-	-	-	-	-
TpB_NoUV_BPS4_VEP_ALL.xlsx	TpB	NoUV	BPS4	13:19192508-19192508	C	downstream_gene_variant	MODIFIER	Trgv6	ENSMUSG00000076746	Transcript	ENSMUST00000103555.2	TR_V_gene	-	-	-	-	-	-	-	-	-	-	1579	1	-	MGI	-	-	-	A2	-	ENSMUSP00000100336	-	A0A075B5Y8	UPI0001F79033	-	-	-	-	-	-	-	-	-
TpB_NoUV_BPS4_VEP_ALL.xlsx	TpB	NoUV	BPS4	13:19192508-19192508	C	missense_variant	MODERATE	Trgv5	ENSMUSG00000076747	Transcript	ENSMUST00000103556.2	TR_V_gene	01 of 01	-	ENSMUST00000103556.2:c.76T>C	ENSMUSP00000100337.2:p.Ser26Pro	76	76	26	S/P	Tct/Cct	-	-	1	-	MGI	-	-	-	P1	-	ENSMUSP00000100337	-	A0A075B5Y9	UPI0003F4871E	deleterious(0.02)	-	-	-	-	-	-	-	-
TpB_NoUV_BPS4_VEP_ALL.xlsx	TpB	NoUV	BPS4	13:111764088-111764088	G	missense_variant	MODERATE	Map3k1	ENSMUSG00000021754	Transcript	ENSMUST00000109267.8	protein_coding	07 of 20	-	ENSMUST00000109267.8:c.1402T>C	ENSMUSP00000104890.2:p.Ser468Pro	1426	1402	468	S/P	Tcc/Ccc	-	-	-1	-	MGI	-	-	2	P1	CCDS26771.1	ENSMUSP00000104890	-	F8VQ72	UPI0000434AB7	deleterious(0)	-	-	-	-	-	-	-	-
TpB_NoUV_BPS4_VEP_ALL.xlsx	TpB	NoUV	BPS4	13:111764088-111764088	G	downstream_gene_variant	MODIFIER	Map3k1	ENSMUSG00000021754	Transcript	ENSMUST00000133364.1	processed_transcript	-	-	-	-	-	-	-	-	-	-	3521	-1	-	MGI	-	-	3	-	-	-	-	-	-	-	-	-	-	-	-	-	-	-
TpB_NoUV_BPS4_VEP_ALL.xlsx	TpB	NoUV	BPS4	13:119596765-119596765	T	intron_variant	MODIFIER	Tmem267	ENSMUSG00000074634	Transcript	ENSMUST00000099147.4	protein_coding	-	03 of 03	ENSMUST00000099147.4:c.*36-13672C>T	-	-	-	-	-	-	-	-	1	-	MGI	-	-	5	P1	CCDS56899.1	ENSMUSP00000096751	-	H3BJ86	UPI0001D134CD	-	-	-	-	-	-	-	-	-
TpB_NoUV_BPS4_VEP_ALL.xlsx	TpB	NoUV	BPS4	13:119596766-119596766	G	intron_variant	MODIFIER	Tmem267	ENSMUSG00000074634	Transcript	ENSMUST00000099147.4	protein_coding	-	03 of 03	ENSMUST00000099147.4:c.*36-13671A>G	-	-	-	-	-	-	-	-	1	-	MGI	-	-	5	P1	CCDS56899.1	ENSMUSP00000096751	-	H3BJ86	UPI0001D134CD	-	-	-	-	-	-	-	-	-
TpB_NoUV_BPS4_VEP_ALL.xlsx	TpB	NoUV	BPS4	15:5212081-5212081	T	missense_variant	MODERATE	Ttc33	ENSMUSG00000022151	Transcript	ENSMUST00000022751.14	protein_coding	04 of 05	-	ENSMUST00000022751.14:c.386C>T	ENSMUSP00000022751.8:p.Ala129Val	596	386	129	A/V	gCg/gTg	-	-	1	-	MGI	-	-	1	P1	CCDS27364.1	ENSMUSP00000022751	Q9D6K7	-	UPI0000021E18	deleterious(0.01)	-	-	-	-	-	-	-	-
TpB_NoUV_BPS4_VEP_ALL.xlsx	TpB	NoUV	BPS4	15:5212081-5212081	T	missense_variant	MODERATE	Ttc33	ENSMUSG00000022151	Transcript	ENSMUST00000081640.11	protein_coding	03 of 04	-	ENSMUST00000081640.11:c.304C>T	ENSMUSP00000080345.5:p.Arg102Cys	347	304	102	R/C	Cgt/Tgt	-	-	1	-	MGI	-	-	1	-	-	ENSMUSP00000080345	Q9D6K7	-	UPI00000267E6	-	-	-	-	-	-	-	-	-
TpB_NoUV_BPS4_VEP_ALL.xlsx	TpB	NoUV	BPS4	15:5212081-5212081	T	downstream_gene_variant	MODIFIER	Gm15937	ENSMUSG00000084024	Transcript	ENSMUST00000120727.1	processed_pseudogene	-	-	-	-	-	-	-	-	-	-	1934	1	-	MGI	-	-	-	-	-	-	-	-	-	-	-	-	-	-	-	-	-	-
TpB_NoUV_BPS4_VEP_ALL.xlsx	TpB	NoUV	BPS4	16:88671526-88671526	C	synonymous_variant	LOW	Krtap27-1	ENSMUSG00000090515	Transcript	ENSMUST00000165580.2	protein_coding	01 of 01	-	ENSMUST00000165580.2:c.129A>G	ENSMUSP00000129289.1:p.Arg43%3D	146	129	43	R	agA/agG	-	-	-1	-	MGI	-	-	-	P1	CCDS49892.1	ENSMUSP00000129289	-	E9PX37	UPI0000607857	-	-	-	-	-	-	-	-	-
TpB_NoUV_BPS4_VEP_ALL.xlsx	TpB	NoUV	BPS4	17:18947771-18947771	A	missense_variant	MODERATE	Vmn2r97	ENSMUSG00000091491	Transcript	ENSMUST00000168710.2	protein_coding	06 of 06	-	ENSMUST00000168710.2:c.2286T>A	ENSMUSP00000129313.1:p.Ser762Arg	2308	2286	762	S/R	agT/agA	-	-	1	-	MGI	-	-	5	P1	CCDS49975.1	ENSMUSP00000129313	-	K7N6Z2	UPI00015C726D	deleterious(0)	-	-	-	-	-	-	-	-
TpB_NoUV_BPS4_VEP_ALL.xlsx	TpB	NoUV	BPS4	17:18947771-18947771	A	intron_variant	MODIFIER	Vmn2r97	ENSMUSG00000091491	Transcript	ENSMUST00000232219.1	protein_coding	-	05 of 05	ENSMUST00000232219.1:c.1657+7510T>A	-	-	-	-	-	-	-	-	1	-	MGI	-	-	-	-	-	ENSMUSP00000156141	-	A0A338P6X1	UPI000DE7D423	-	-	-	-	-	-	-	-	-
TpB_NoUV_BPS4_VEP_ALL.xlsx	TpB	NoUV	BPS4	17:30742861-30742861	C	intron_variant	MODIFIER	Dnah8	ENSMUSG00000033826	Transcript	ENSMUST00000170651.1	protein_coding	-	48 of 92	ENSMUST00000170651.1:c.6900+71T>C	-	-	-	-	-	-	-	-	1	-	MGI	-	-	1	P1	CCDS37541.1	ENSMUSP00000127878	Q91XQ0	-	UPI0000F516BB	-	-	-	-	-	-	-	-	-
TpB_NoUV_BPS4_VEP_ALL.xlsx	TpB	NoUV	BPS4	17:34754577-34754577	T	intergenic_variant	MODIFIER	-	-	-	-	-	-	-	-	-	-	-	-	-	-	-	-	-	-	-	-	-	-	-	-	-	-	-	-	-	-	-	-	-	-	-	-	-
TpB_NoUV_BPS4_VEP_ALL.xlsx	TpB	NoUV	BPS4	18:25322143-25322143	C	intron_variant	MODIFIER	AW554918	ENSMUSG00000033632	Transcript	ENSMUST00000036619.13	protein_coding	-	06 of 09	ENSMUST00000036619.13:c.574-17571T>C	-	-	-	-	-	-	-	-	1	-	MGI	-	-	5	P5	-	ENSMUSP00000046227	-	E9QPX6	UPI0000215FAB	-	-	-	-	-	-	-	-	-
TpB_NoUV_BPS4_VEP_ALL.xlsx	TpB	NoUV	BPS4	18:58088855-58088855	T	intron_variant	MODIFIER	Fbn2	ENSMUSG00000024598	Transcript	ENSMUST00000025497.7	protein_coding	-	19 of 64	ENSMUST00000025497.7:c.2533+1689C>A	-	-	-	-	-	-	-	-	-1	-	MGI	-	-	5	P1	CCDS37827.1	ENSMUSP00000025497	Q61555	-	UPI000021607A	-	-	-	-	-	-	-	-	-
TpB_NoUV_BPS4_VEP_ALL.xlsx	TpB	NoUV	BPS4	2:177481482-177481482	T	downstream_gene_variant	MODIFIER	Zfp970	ENSMUSG00000078866	Transcript	ENSMUST00000099002.9	protein_coding	-	-	-	-	-	-	-	-	-	-	3353	1	-	MGI	-	-	2	-	-	ENSMUSP00000096600	-	B1AYE1	UPI00001EF0D6	-	-	-	-	-	-	-	-	-
TpB_NoUV_BPS4_VEP_ALL.xlsx	TpB	NoUV	BPS4	2:177481497-177481497	A	downstream_gene_variant	MODIFIER	Zfp970	ENSMUSG00000078866	Transcript	ENSMUST00000099002.9	protein_coding	-	-	-	-	-	-	-	-	-	-	3368	1	-	MGI	-	-	2	-	-	ENSMUSP00000096600	-	B1AYE1	UPI00001EF0D6	-	-	-	-	-	-	-	-	-
TpB_NoUV_BPS4_VEP_ALL.xlsx	TpB	NoUV	BPS4	3:92824401-92824401	A	synonymous_variant	LOW	Kprp	ENSMUSG00000059832	Transcript	ENSMUST00000072363.4	protein_coding	02 of 02	-	ENSMUST00000072363.4:c.1341C>T	ENSMUSP00000072200.4:p.Cys447%3D	1402	1341	447	C	tgC/tgT	-	-	-1	-	MGI	-	-	1	P1	CCDS38517.1	ENSMUSP00000072200	B2RUR4	-	UPI000042894A	-	-	-	-	-	-	-	-	-
TpB_NoUV_BPS4_VEP_ALL.xlsx	TpB	NoUV	BPS4	3:92824401-92824401	A	regulatory_region_variant	MODIFIER	-	-	RegulatoryFeature	ENSMUSR00000649211	-	-	-	-	-	-	-	-	-	-	-	-	-	-	-	-	-	-	-	-	-	-	-	-	-	-	-	-	-	-	-	-	-
TpB_NoUV_BPS4_VEP_ALL.xlsx	TpB	NoUV	BPS4	4:112575687-112575687	C	intron_variant	MODIFIER	Skint2	ENSMUSG00000034359	Transcript	ENSMUST00000106560.9	protein_coding	-	01 of 06	ENSMUST00000106560.9:c.-6+18480T>C	-	-	-	-	-	-	-	-	1	-	MGI	-	-	1	A2	-	ENSMUSP00000102170	-	B2ZEZ5	UPI000011C967	-	-	-	-	-	-	-	-	-
TpB_NoUV_BPS4_VEP_ALL.xlsx	TpB	NoUV	BPS4	5:15620607-15620607	T	intron_variant	MODIFIER	Speer4d	ENSMUSG00000070933	Transcript	ENSMUST00000095006.8	protein_coding	-	02 of 04	ENSMUST00000095006.8:c.167+162A>T	-	-	-	-	-	-	-	-	1	-	MGI	-	-	1	P1	CCDS19095.1	ENSMUSP00000092615	-	L7N216	UPI000024F7B7	-	-	-	-	-	-	-	-	-
TpB_NoUV_BPS4_VEP_ALL.xlsx	TpB	NoUV	BPS4	7:13962034-13962034	C	intron_variant	MODIFIER	Sult2a4	ENSMUSG00000074377	Transcript	ENSMUST00000108520.3	protein_coding	-	03 of 05	ENSMUST00000108520.3:c.472+22814A>G	-	-	-	-	-	-	-	-	-1	-	MGI	-	-	5	A2	-	ENSMUSP00000104160	-	L7N245	UPI000060551B	-	-	-	-	-	-	-	-	-
TpB_NoUV_BPS4_VEP_ALL.xlsx	TpB	NoUV	BPS4	7:19136836-19136836	A	downstream_gene_variant	MODIFIER	Qpctl	ENSMUSG00000030407	Transcript	ENSMUST00000032566.2	protein_coding	-	-	-	-	-	-	-	-	-	-	2866	-1	-	MGI	-	-	1	P1	CCDS20891.1	ENSMUSP00000032566	Q8BH73	-	UPI00000234B7	-	-	-	-	-	-	-	-	-
TpB_NoUV_BPS4_VEP_ALL.xlsx	TpB	NoUV	BPS4	7:19136836-19136836	A	missense_variant	MODERATE	Fbxo46	ENSMUSG00000050428	Transcript	ENSMUST00000053109.4	protein_coding	02 of 02	-	ENSMUST00000053109.4:c.1379G>A	ENSMUSP00000055692.3:p.Arg460His	1537	1379	460	R/H	cGc/cAc	-	-	1	-	MGI	-	-	1	P1	CCDS20890.1	ENSMUSP00000055692	Q8BG80	-	UPI00000EBA46	deleterious(0)	-	-	-	-	-	-	-	-
TpB_NoUV_BPS4_VEP_ALL.xlsx	TpB	NoUV	BPS4	X:169978744-169978744	G	intron_variant	MODIFIER	Mid1	ENSMUSG00000035299	Transcript	ENSMUST00000036753.11	protein_coding	-	04 of 09	ENSMUST00000036753.11:c.864+1715A>G	-	-	-	-	-	-	-	-	1	-	MGI	-	-	5	P1	CCDS41215.1	ENSMUSP00000038765	O70583	-	UPI000019349A	-	-	-	-	-	-	-	-	-
TpB_NoUV_BPS8_VEP_ALL.xlsx	TpB	NoUV	BPS8	1:85112869-85112869	C	intron_variant,non_coding_transcript_variant	MODIFIER	A530040E14Rik	ENSMUSG00000072109	Transcript	ENSMUST00000093501.9	antisense	-	05 of 05	ENSMUST00000093501.9:n.527-178A>C	-	-	-	-	-	-	-	-	1	-	MGI	-	-	1	-	-	-	-	-	-	-	-	-	-	-	-	-	-	-
TpB_NoUV_BPS8_VEP_ALL.xlsx	TpB	NoUV	BPS8	1:85280548-85280548	T	intron_variant,non_coding_transcript_variant	MODIFIER	Gm16026	ENSMUSG00000079455	Transcript	ENSMUST00000159695.1	transcribed_unprocessed_pseudogene	-	03 of 06	ENSMUST00000159695.1:n.394+639C>T	-	-	-	-	-	-	-	-	1	-	MGI	-	-	-	-	-	-	-	-	-	-	-	-	-	-	-	-	-	-
TpB_NoUV_BPS8_VEP_ALL.xlsx	TpB	NoUV	BPS8	1:85280579-85280579	G	intron_variant,non_coding_transcript_variant	MODIFIER	Gm16026	ENSMUSG00000079455	Transcript	ENSMUST00000159695.1	transcribed_unprocessed_pseudogene	-	03 of 06	ENSMUST00000159695.1:n.394+670A>G	-	-	-	-	-	-	-	-	1	-	MGI	-	-	-	-	-	-	-	-	-	-	-	-	-	-	-	-	-	-
TpB_NoUV_BPS8_VEP_ALL.xlsx	TpB	NoUV	BPS8	1:88215383-88215383	A	intron_variant	MODIFIER	Ugt1a6a	ENSMUSG00000054545	Transcript	ENSMUST00000014263.5	protein_coding	-	02 of 04	ENSMUST00000014263.5:c.990+208C>A	-	-	-	-	-	-	-	-	1	-	MGI	-	-	1	P1	CCDS48314.1	ENSMUSP00000014263	Q64435	-	UPI0000021303	-	-	-	-	-	-	-	-	-
TpB_NoUV_BPS8_VEP_ALL.xlsx	TpB	NoUV	BPS8	1:89888952-89888952	A	3_prime_UTR_variant	MODIFIER	Agap1	ENSMUSG00000055013	Transcript	ENSMUST00000027521.14	protein_coding	18 of 18	-	ENSMUST00000027521.14:c.*58C>A	-	3256	-	-	-	-	-	-	1	-	MGI	-	-	1	P4	CCDS15149.1	ENSMUSP00000027521	Q8BXK8	-	UPI00000EA66A	-	-	-	-	-	-	-	-	-
TpB_NoUV_BPS8_VEP_ALL.xlsx	TpB	NoUV	BPS8	1:180802866-180802866	A	3_prime_UTR_variant	MODIFIER	H3f3a	ENSMUSG00000060743	Transcript	ENSMUST00000081026.10	protein_coding	04 of 04	-	ENSMUST00000081026.10:c.*211G>T	-	719	-	-	-	-	-	-	-1	-	MGI	-	-	5	A1	-	ENSMUSP00000079816	-	F8WI35	UPI000035411A	-	-	-	-	-	-	-	-	-
TpB_NoUV_BPS8_VEP_ALL.xlsx	TpB	NoUV	BPS8	13:58846646-58846646	A	intron_variant	MODIFIER	Ntrk2	ENSMUSG00000055254	Transcript	ENSMUST00000079828.6	protein_coding	-	05 of 17	ENSMUST00000079828.6:c.429-54G>A	-	-	-	-	-	-	-	-	1	-	MGI	-	-	1	P1	CCDS26573.1	ENSMUSP00000078757	P15209	-	UPI0000021C47	-	-	-	-	-	-	-	-	-
TpB_NoUV_BPS8_VEP_ALL.xlsx	TpB	NoUV	BPS8	13:65894548-65894548	A	non_coding_transcript_exon_variant	MODIFIER	Cbx3-ps1	ENSMUSG00000074841	Transcript	ENSMUST00000091539.3	processed_pseudogene	01 of 01	-	ENSMUST00000091539.3:n.212A>T	-	212	-	-	-	-	-	-	-1	-	MGI	-	-	-	-	-	-	-	-	-	-	-	-	-	-	-	-	-	-
TpB_NoUV_BPS8_VEP_ALL.xlsx	TpB	NoUV	BPS8	14:30660066-30660066	A	intron_variant	MODIFIER	Rft1	ENSMUSG00000052395	Transcript	ENSMUST00000064230.15	protein_coding	-	02 of 12	ENSMUST00000064230.15:c.150-131C>A	-	-	-	-	-	-	-	-	1	-	MGI	-	-	1	P1	CCDS26896.1	ENSMUSP00000064153	Q8C3B8	-	UPI0000025314	-	-	-	-	-	-	-	-	-
TpB_NoUV_BPS8_VEP_ALL.xlsx	TpB	NoUV	BPS8	14:51412875-51412875	C	intron_variant	MODIFIER	Vmn2r88	ENSMUSG00000000606	Transcript	ENSMUST00000022438.11	protein_coding	-	01 of 05	ENSMUST00000022438.11:c.207-163A>C	-	-	-	-	-	-	-	-	1	-	MGI	-	-	5	P2	CCDS56953.1	ENSMUSP00000022438	-	L7N1W8	UPI00015B9BB5	-	-	-	-	-	-	-	-	-
TpB_NoUV_BPS8_VEP_ALL.xlsx	TpB	NoUV	BPS8	15:23359649-23359649	T	intron_variant,non_coding_transcript_variant	MODIFIER	Cdh18	ENSMUSG00000040420	Transcript	ENSMUST00000040427.13	retained_intron	-	04 of 09	ENSMUST00000040427.13:n.1015-7204G>T	-	-	-	-	-	-	-	-	1	-	MGI	-	-	1	-	-	-	-	-	-	-	-	-	-	-	-	-	-	-
TpB_NoUV_BPS8_VEP_ALL.xlsx	TpB	NoUV	BPS8	15:23359661-23359661	T	intron_variant,non_coding_transcript_variant	MODIFIER	Cdh18	ENSMUSG00000040420	Transcript	ENSMUST00000040427.13	retained_intron	-	04 of 09	ENSMUST00000040427.13:n.1015-7192G>T	-	-	-	-	-	-	-	-	1	-	MGI	-	-	1	-	-	-	-	-	-	-	-	-	-	-	-	-	-	-
TpB_NoUV_BPS8_VEP_ALL.xlsx	TpB	NoUV	BPS8	15:23359670-23359670	T	intron_variant,non_coding_transcript_variant	MODIFIER	Cdh18	ENSMUSG00000040420	Transcript	ENSMUST00000040427.13	retained_intron	-	04 of 09	ENSMUST00000040427.13:n.1015-7183G>T	-	-	-	-	-	-	-	-	1	-	MGI	-	-	1	-	-	-	-	-	-	-	-	-	-	-	-	-	-	-
TpB_NoUV_BPS8_VEP_ALL.xlsx	TpB	NoUV	BPS8	15:64152826-64152826	A	splice_region_variant,intron_variant	LOW	Asap1	ENSMUSG00000022377	Transcript	ENSMUST00000023008.15	protein_coding	-	13 of 30	ENSMUST00000023008.15:c.1055+4C>T	-	-	-	-	-	-	-	-	-1	-	MGI	-	-	5	A2	-	ENSMUSP00000023008	-	E9QN63	UPI0000564AEB	-	-	-	-	-	-	-	-	-
TpB_NoUV_BPS8_VEP_ALL.xlsx	TpB	NoUV	BPS8	16:4939585-4939585	A	downstream_gene_variant	MODIFIER	Anks3	ENSMUSG00000022515	Transcript	ENSMUST00000023157.5	protein_coding	-	-	-	-	-	-	-	-	-	-	1851	-1	-	MGI	-	-	1	P1	CCDS27928.1	ENSMUSP00000023157	Q9CZK6	-	UPI0000021F21	-	-	-	-	-	-	-	-	-
TpB_NoUV_BPS8_VEP_ALL.xlsx	TpB	NoUV	BPS8	16:4939585-4939585	A	missense_variant	MODERATE	Nudt16l1	ENSMUSG00000022516	Transcript	ENSMUST00000050881.9	protein_coding	02 of 03	-	ENSMUST00000050881.9:c.361C>A	ENSMUSP00000054201.9:p.Gln121Lys	380	361	121	Q/K	Caa/Aaa	-	-	1	-	MGI	-	-	1	-	-	ENSMUSP00000054201	Q8VHN8	-	UPI00000282AF	deleterious(0.01)	-	-	-	-	-	-	-	-
TpB_NoUV_BPS8_VEP_ALL.xlsx	TpB	NoUV	BPS8	16:89047785-89047785	T	missense_variant	MODERATE	Krtap6-5	ENSMUSG00000062400	Transcript	ENSMUST00000074637.3	protein_coding	01 of 01	-	ENSMUST00000074637.3:c.59G>A	ENSMUSP00000074211.2:p.Gly20Glu	99	59	20	G/E	gGa/gAa	-	-	-1	-	MGI	-	-	-	P1	CCDS37390.1	ENSMUSP00000074211	Q925H3	-	UPI0000024239	-	-	-	-	-	-	-	-	-
TpB_NoUV_BPS8_VEP_ALL.xlsx	TpB	NoUV	BPS8	2:111844729-111844729	G	non_coding_transcript_exon_variant	MODIFIER	Olfr268-ps1	ENSMUSG00000083059	Transcript	ENSMUST00000121395.1	unprocessed_pseudogene	02 of 02	-	ENSMUST00000121395.1:n.478T>C	-	478	-	-	-	-	-	-	-1	-	MGI	-	-	-	-	-	-	-	-	-	-	-	-	-	-	-	-	-	-
TpB_NoUV_BPS8_VEP_ALL.xlsx	TpB	NoUV	BPS8	4:108131835-108131835	T	intron_variant	MODIFIER	Scp2	ENSMUSG00000028603	Transcript	ENSMUST00000130776.1	protein_coding	-	01 of 04	ENSMUST00000130776.1:c.21+12946G>A	-	-	-	-	-	-	-	-	-1	cds_end_NF	MGI	-	-	3	-	-	ENSMUSP00000123630	-	A2APS5	UPI000059E048	-	-	-	-	-	-	-	-	-
TpB_NoUV_BPS8_VEP_ALL.xlsx	TpB	NoUV	BPS8	5:15620607-15620607	T	intron_variant	MODIFIER	Speer4d	ENSMUSG00000070933	Transcript	ENSMUST00000095006.8	protein_coding	-	02 of 04	ENSMUST00000095006.8:c.167+162A>T	-	-	-	-	-	-	-	-	1	-	MGI	-	-	1	P1	CCDS19095.1	ENSMUSP00000092615	-	L7N216	UPI000024F7B7	-	-	-	-	-	-	-	-	-
TpB_NoUV_BPS8_VEP_ALL.xlsx	TpB	NoUV	BPS8	7:65658741-65658741	G	intron_variant	MODIFIER	Tarsl2	ENSMUSG00000030515	Transcript	ENSMUST00000032728.8	protein_coding	-	05 of 18	ENSMUST00000032728.8:c.777-119A>G	-	-	-	-	-	-	-	-	1	-	MGI	-	-	1	P1	CCDS21339.1	ENSMUSP00000032728	Q8BLY2	-	UPI00000EB3C7	-	-	-	-	-	-	-	-	-
TpB_NoUV_BPS8_VEP_ALL.xlsx	TpB	NoUV	BPS8	9:79853810-79853810	T	intron_variant	MODIFIER	Filip1	ENSMUSG00000034898	Transcript	ENSMUST00000093811.10	protein_coding	-	03 of 05	ENSMUST00000093811.10:c.451-10G>A	-	-	-	-	-	-	-	-	-1	-	MGI	-	-	1	P2	CCDS40704.1	ENSMUSP00000091329	-	Q059P4	UPI000024E1DD	-	-	-	-	-	-	-	-	-
TpB_NoUV_BPS8_VEP_ALL.xlsx	TpB	NoUV	BPS8	X:147478945-147478945	T	intron_variant	MODIFIER	Lrch2	ENSMUSG00000031290	Transcript	ENSMUST00000112819.8	protein_coding	-	20 of 20	ENSMUST00000112819.8:c.2202+1312G>A	-	-	-	-	-	-	-	-	-1	-	MGI	-	-	5	P1	CCDS41160.1	ENSMUSP00000108438	Q3UMG5	-	UPI00006086E2	-	-	-	-	-	-	-	-	-
TpB_NoUV_BPS8_VEP_ALL.xlsx	TpB	NoUV	BPS8	X:169979324-169979324	T	intron_variant	MODIFIER	Mid1	ENSMUSG00000035299	Transcript	ENSMUST00000036753.11	protein_coding	-	04 of 09	ENSMUST00000036753.11:c.864+2295C>T	-	-	-	-	-	-	-	-	1	-	MGI	-	-	5	P1	CCDS41215.1	ENSMUSP00000038765	O70583	-	UPI000019349A	-	-	-	-	-	-	-	-	-
TpB_UVA_UV560_VEP_ALL.xlsx	TpB	UVA	UV560	1:58861438-58861438	G	intron_variant,non_coding_transcript_variant	MODIFIER	Gm28802	ENSMUSG00000099719	Transcript	ENSMUST00000188624.1	unprocessed_pseudogene	-	06 of 11	ENSMUST00000188624.1:n.524-72T>C	-	-	-	-	-	-	-	-	-1	-	MGI	-	-	-	-	-	-	-	-	-	-	-	-	-	-	-	-	-	-
TpB_UVA_UV560_VEP_ALL.xlsx	TpB	UVA	UV560	10:22383812-22383812	T	intergenic_variant	MODIFIER	-	-	-	-	-	-	-	-	-	-	-	-	-	-	-	-	-	-	-	-	-	-	-	-	-	-	-	-	-	-	-	-	-	-	-	-	-
TpB_UVA_UV560_VEP_ALL.xlsx	TpB	UVA	UV560	11:102896958-102896958	T	missense_variant	MODERATE	Gfap	ENSMUSG00000020932	Transcript	ENSMUST00000067444.9	protein_coding	01 of 09	-	ENSMUST00000067444.9:c.160G>A	ENSMUSP00000064691.3:p.Ala54Thr	174	160	54	A/T	Gcg/Acg	-	-	-1	-	MGI	-	-	1	P1	CCDS25507.1	ENSMUSP00000064691	P03995	-	UPI0000192B9B	deleterious(0.01)	-	-	-	-	-	-	-	-
TpB_UVA_UV560_VEP_ALL.xlsx	TpB	UVA	UV560	11:102896958-102896958	T	intron_variant,non_coding_transcript_variant	MODIFIER	Gfap	ENSMUSG00000020932	Transcript	ENSMUST00000127909.1	processed_transcript	-	01 of 03	ENSMUST00000127909.1:n.147-1148G>A	-	-	-	-	-	-	-	-	-1	-	MGI	-	-	3	-	-	-	-	-	-	-	-	-	-	-	-	-	-	-
TpB_UVA_UV560_VEP_ALL.xlsx	TpB	UVA	UV560	13:23585237-23585237	C	3_prime_UTR_variant	MODIFIER	H2bc6	ENSMUSG00000047246	Transcript	ENSMUST00000051091.4	protein_coding	02 of 02	-	ENSMUST00000051091.4:c.*339A>G	-	939	-	-	-	-	-	-	-1	-	MGI	-	-	1	P1	CCDS26354.1	ENSMUSP00000061247	Q6ZWY9	-	UPI0000000C24	-	-	-	-	-	-	-	-	-
TpB_UVA_UV560_VEP_ALL.xlsx	TpB	UVA	UV560	13:61567948-61567948	G	intron_variant	MODIFIER	Cts3	ENSMUSG00000074870	Transcript	ENSMUST00000054702.8	protein_coding	-	04 of 07	ENSMUST00000054702.8:c.396+107T>C	-	-	-	-	-	-	-	-	-1	-	MGI	-	-	1	P1	CCDS36695.1	ENSMUSP00000058359	-	Q91ZD5	UPI0000021BF4	-	-	-	-	-	-	-	-	-
TpB_UVA_UV560_VEP_ALL.xlsx	TpB	UVA	UV560	13:61567978-61567978	G	intron_variant	MODIFIER	Cts3	ENSMUSG00000074870	Transcript	ENSMUST00000054702.8	protein_coding	-	04 of 07	ENSMUST00000054702.8:c.396+77T>C	-	-	-	-	-	-	-	-	-1	-	MGI	-	-	1	P1	CCDS36695.1	ENSMUSP00000058359	-	Q91ZD5	UPI0000021BF4	-	-	-	-	-	-	-	-	-
TpB_UVA_UV560_VEP_ALL.xlsx	TpB	UVA	UV560	13:61780662-61780662	T	intergenic_variant	MODIFIER	-	-	-	-	-	-	-	-	-	-	-	-	-	-	-	-	-	-	-	-	-	-	-	-	-	-	-	-	-	-	-	-	-	-	-	-	-
TpB_UVA_UV560_VEP_ALL.xlsx	TpB	UVA	UV560	13:61780841-61780841	G	intergenic_variant	MODIFIER	-	-	-	-	-	-	-	-	-	-	-	-	-	-	-	-	-	-	-	-	-	-	-	-	-	-	-	-	-	-	-	-	-	-	-	-	-
TpB_UVA_UV560_VEP_ALL.xlsx	TpB	UVA	UV560	13:61785872-61785872	A	intergenic_variant	MODIFIER	-	-	-	-	-	-	-	-	-	-	-	-	-	-	-	-	-	-	-	-	-	-	-	-	-	-	-	-	-	-	-	-	-	-	-	-	-
TpB_UVA_UV560_VEP_ALL.xlsx	TpB	UVA	UV560	13:62146182-62146182	C	intron_variant	MODIFIER	Zfp808	ENSMUSG00000074867	Transcript	ENSMUST00000099449.3	protein_coding	-	01 of 03	ENSMUST00000099449.3:c.3+16154T>C	-	-	-	-	-	-	-	-	1	-	MGI	-	-	1	P1	CCDS36696.1	ENSMUSP00000097048	-	B8JJZ4	UPI0000606E6C	-	-	-	-	-	-	-	-	-
TpB_UVA_UV560_VEP_ALL.xlsx	TpB	UVA	UV560	13:62146209-62146209	A	intron_variant	MODIFIER	Zfp808	ENSMUSG00000074867	Transcript	ENSMUST00000099449.3	protein_coding	-	01 of 03	ENSMUST00000099449.3:c.3+16181G>A	-	-	-	-	-	-	-	-	1	-	MGI	-	-	1	P1	CCDS36696.1	ENSMUSP00000097048	-	B8JJZ4	UPI0000606E6C	-	-	-	-	-	-	-	-	-
TpB_UVA_UV560_VEP_ALL.xlsx	TpB	UVA	UV560	13:62667957-62667957	C	downstream_gene_variant	MODIFIER	Platr25	ENSMUSG00000074863	Transcript	ENSMUST00000220733.1	protein_coding	-	-	-	-	-	-	-	-	-	-	3827	-1	-	MGI	-	-	5	P5	-	ENSMUSP00000152199	-	A0A1Y7VIZ1	UPI0007ED0749	-	-	-	-	-	-	-	-	-
TpB_UVA_UV560_VEP_ALL.xlsx	TpB	UVA	UV560	13:62760657-62760657	C	upstream_gene_variant	MODIFIER	Mir713	ENSMUSG00000096098	Transcript	ENSMUST00000178651.1	miRNA	-	-	-	-	-	-	-	-	-	-	82	1	-	MGI	-	-	-	-	-	-	-	-	-	-	-	-	-	-	-	-	-	-
TpB_UVA_UV560_VEP_ALL.xlsx	TpB	UVA	UV560	13:65340736-65340736	G	intron_variant,non_coding_transcript_variant	MODIFIER	Gm7762	ENSMUSG00000113406	Transcript	ENSMUST00000220595.1	lincRNA	-	02 of 03	ENSMUST00000220595.1:n.242-127T>C	-	-	-	-	-	-	-	-	-1	-	MGI	-	-	3	-	-	-	-	-	-	-	-	-	-	-	-	-	-	-
TpB_UVA_UV560_VEP_ALL.xlsx	TpB	UVA	UV560	13:65510902-65510902	C	upstream_gene_variant	MODIFIER	Gm10139	ENSMUSG00000063905	Transcript	ENSMUST00000081471.2	protein_coding	-	-	-	-	-	-	-	-	-	-	1776	1	-	MGI	-	-	-	P1	-	ENSMUSP00000080191	-	O88245	UPI00000294B2	-	-	-	-	-	-	-	-	-
TpB_UVA_UV560_VEP_ALL.xlsx	TpB	UVA	UV560	13:65549822-65549822	T	intron_variant,non_coding_transcript_variant	MODIFIER	Gm48166	ENSMUSG00000113618	Transcript	ENSMUST00000222230.1	lincRNA	-	01 of 01	ENSMUST00000222230.1:n.997+55336C>T	-	-	-	-	-	-	-	-	1	-	MGI	-	-	5	-	-	-	-	-	-	-	-	-	-	-	-	-	-	-
TpB_UVA_UV560_VEP_ALL.xlsx	TpB	UVA	UV560	13:65692938-65692938	G	non_coding_transcript_exon_variant	MODIFIER	Gm19428	ENSMUSG00000113260	Transcript	ENSMUST00000220512.1	transcribed_processed_pseudogene	01 of 03	-	ENSMUST00000220512.1:n.59G>C	-	59	-	-	-	-	-	-	-1	-	MGI	-	-	-	-	-	-	-	-	-	-	-	-	-	-	-	-	-	-
TpB_UVA_UV560_VEP_ALL.xlsx	TpB	UVA	UV560	13:65692944-65692944	G	non_coding_transcript_exon_variant	MODIFIER	Gm19428	ENSMUSG00000113260	Transcript	ENSMUST00000220512.1	transcribed_processed_pseudogene	01 of 03	-	ENSMUST00000220512.1:n.53A>C	-	53	-	-	-	-	-	-	-1	-	MGI	-	-	-	-	-	-	-	-	-	-	-	-	-	-	-	-	-	-
TpB_UVA_UV560_VEP_ALL.xlsx	TpB	UVA	UV560	13:65732669-65732669	C	non_coding_transcript_exon_variant	MODIFIER	Vmn2r-ps98	ENSMUSG00000117836	Transcript	ENSMUST00000224983.2	unprocessed_pseudogene	02 of 05	-	ENSMUST00000224983.2:n.663A>G	-	663	-	-	-	-	-	-	-1	-	MGI	-	-	-	-	-	-	-	-	-	-	-	-	-	-	-	-	-	-
TpB_UVA_UV560_VEP_ALL.xlsx	TpB	UVA	UV560	13:65904304-65904304	A	upstream_gene_variant	MODIFIER	Gm48218	ENSMUSG00000114625	Transcript	ENSMUST00000225676.1	processed_pseudogene	-	-	-	-	-	-	-	-	-	-	3919	1	-	MGI	-	-	-	-	-	-	-	-	-	-	-	-	-	-	-	-	-	-
TpB_UVA_UV560_VEP_ALL.xlsx	TpB	UVA	UV560	13:65945942-65945942	G	non_coding_transcript_exon_variant	MODIFIER	Vmn2r-ps100	ENSMUSG00000113723	Transcript	ENSMUST00000221238.2	unprocessed_pseudogene	02 of 04	-	ENSMUST00000221238.2:n.498T>G	-	498	-	-	-	-	-	-	1	-	MGI	-	-	-	-	-	-	-	-	-	-	-	-	-	-	-	-	-	-
TpB_UVA_UV560_VEP_ALL.xlsx	TpB	UVA	UV560	13:65948475-65948475	G	non_coding_transcript_exon_variant	MODIFIER	Vmn2r-ps100	ENSMUSG00000113723	Transcript	ENSMUST00000221238.2	unprocessed_pseudogene	04 of 04	-	ENSMUST00000221238.2:n.795C>G	-	795	-	-	-	-	-	-	1	-	MGI	-	-	-	-	-	-	-	-	-	-	-	-	-	-	-	-	-	-
TpB_UVA_UV560_VEP_ALL.xlsx	TpB	UVA	UV560	13:65950717-65950717	A	downstream_gene_variant	MODIFIER	Vmn2r-ps100	ENSMUSG00000113723	Transcript	ENSMUST00000221238.2	unprocessed_pseudogene	-	-	-	-	-	-	-	-	-	-	2135	1	-	MGI	-	-	-	-	-	-	-	-	-	-	-	-	-	-	-	-	-	-
TpB_UVA_UV560_VEP_ALL.xlsx	TpB	UVA	UV560	13:65956032-65956032	G	intergenic_variant	MODIFIER	-	-	-	-	-	-	-	-	-	-	-	-	-	-	-	-	-	-	-	-	-	-	-	-	-	-	-	-	-	-	-	-	-	-	-	-	-
TpB_UVA_UV560_VEP_ALL.xlsx	TpB	UVA	UV560	13:66119588-66119588	A	intron_variant	MODIFIER	Gm10324	ENSMUSG00000095909	Transcript	ENSMUST00000092528.5	protein_coding	-	01 of 03	ENSMUST00000092528.5:c.3+39T>A	-	-	-	-	-	-	-	-	1	-	MGI	-	-	5	P1	-	ENSMUSP00000090190	-	L7N208	UPI0001D16928	-	-	-	-	-	-	-	-	-
TpB_UVA_UV560_VEP_ALL.xlsx	TpB	UVA	UV560	13:66144285-66144285	A	intergenic_variant	MODIFIER	-	-	-	-	-	-	-	-	-	-	-	-	-	-	-	-	-	-	-	-	-	-	-	-	-	-	-	-	-	-	-	-	-	-	-	-	-
TpB_UVA_UV560_VEP_ALL.xlsx	TpB	UVA	UV560	13:66210564-66210564	G	intergenic_variant	MODIFIER	-	-	-	-	-	-	-	-	-	-	-	-	-	-	-	-	-	-	-	-	-	-	-	-	-	-	-	-	-	-	-	-	-	-	-	-	-
TpB_UVA_UV560_VEP_ALL.xlsx	TpB	UVA	UV560	13:66210613-66210613	T	intergenic_variant	MODIFIER	-	-	-	-	-	-	-	-	-	-	-	-	-	-	-	-	-	-	-	-	-	-	-	-	-	-	-	-	-	-	-	-	-	-	-	-	-
TpB_UVA_UV560_VEP_ALL.xlsx	TpB	UVA	UV560	13:66236441-66236441	C	upstream_gene_variant	MODIFIER	Gm48241	ENSMUSG00000113253	Transcript	ENSMUST00000222795.1	processed_pseudogene	-	-	-	-	-	-	-	-	-	-	4336	1	-	MGI	-	-	-	-	-	-	-	-	-	-	-	-	-	-	-	-	-	-
TpB_UVA_UV560_VEP_ALL.xlsx	TpB	UVA	UV560	13:66342841-66342841	C	non_coding_transcript_exon_variant	MODIFIER	C330022B21Rik	ENSMUSG00000114729	Transcript	ENSMUST00000224620.1	processed_pseudogene	01 of 01	-	ENSMUST00000224620.1:n.95T>G	-	95	-	-	-	-	-	-	-1	-	MGI	-	-	-	-	-	-	-	-	-	-	-	-	-	-	-	-	-	-
TpB_UVA_UV560_VEP_ALL.xlsx	TpB	UVA	UV560	13:66342844-66342844	G	non_coding_transcript_exon_variant	MODIFIER	C330022B21Rik	ENSMUSG00000114729	Transcript	ENSMUST00000224620.1	processed_pseudogene	01 of 01	-	ENSMUST00000224620.1:n.92T>C	-	92	-	-	-	-	-	-	-1	-	MGI	-	-	-	-	-	-	-	-	-	-	-	-	-	-	-	-	-	-
TpB_UVA_UV560_VEP_ALL.xlsx	TpB	UVA	UV560	13:66343195-66343195	G	upstream_gene_variant	MODIFIER	C330022B21Rik	ENSMUSG00000114729	Transcript	ENSMUST00000224620.1	processed_pseudogene	-	-	-	-	-	-	-	-	-	-	260	-1	-	MGI	-	-	-	-	-	-	-	-	-	-	-	-	-	-	-	-	-	-
TpB_UVA_UV560_VEP_ALL.xlsx	TpB	UVA	UV560	13:66351494-66351494	T	intron_variant,non_coding_transcript_variant	MODIFIER	Vmn2r-ps104	ENSMUSG00000094499	Transcript	ENSMUST00000099416.4	transcribed_unprocessed_pseudogene	-	04 of 04	ENSMUST00000099416.4:n.1426-95T>A	-	-	-	-	-	-	-	-	-1	-	MGI	-	-	5	-	-	-	-	-	-	-	-	-	-	-	-	-	-	-
TpB_UVA_UV560_VEP_ALL.xlsx	TpB	UVA	UV560	13:66488296-66488296	T	upstream_gene_variant	MODIFIER	Gm48323	ENSMUSG00000114406	Transcript	ENSMUST00000224488.1	processed_pseudogene	-	-	-	-	-	-	-	-	-	-	2651	1	-	MGI	-	-	-	-	-	-	-	-	-	-	-	-	-	-	-	-	-	-
TpB_UVA_UV560_VEP_ALL.xlsx	TpB	UVA	UV560	13:66680538-66680538	T	intron_variant,non_coding_transcript_variant	MODIFIER	Zfp640	ENSMUSG00000074830	Transcript	ENSMUST00000071320.5	processed_transcript	-	01 of 03	ENSMUST00000071320.5:n.87-7208G>A	-	-	-	-	-	-	-	-	-1	-	MGI	-	-	5	-	-	-	-	-	-	-	-	-	-	-	-	-	-	-
TpB_UVA_UV560_VEP_ALL.xlsx	TpB	UVA	UV560	13:66680544-66680544	G	intron_variant,non_coding_transcript_variant	MODIFIER	Zfp640	ENSMUSG00000074830	Transcript	ENSMUST00000071320.5	processed_transcript	-	01 of 03	ENSMUST00000071320.5:n.87-7214G>C	-	-	-	-	-	-	-	-	-1	-	MGI	-	-	5	-	-	-	-	-	-	-	-	-	-	-	-	-	-	-
TpB_UVA_UV560_VEP_ALL.xlsx	TpB	UVA	UV560	13:66687197-66687197	T	intron_variant,non_coding_transcript_variant	MODIFIER	Zfp640	ENSMUSG00000074830	Transcript	ENSMUST00000071320.5	processed_transcript	-	01 of 03	ENSMUST00000071320.5:n.86+10961G>A	-	-	-	-	-	-	-	-	-1	-	MGI	-	-	5	-	-	-	-	-	-	-	-	-	-	-	-	-	-	-
TpB_UVA_UV560_VEP_ALL.xlsx	TpB	UVA	UV560	13:66687205-66687205	G	intron_variant,non_coding_transcript_variant	MODIFIER	Zfp640	ENSMUSG00000074830	Transcript	ENSMUST00000071320.5	processed_transcript	-	01 of 03	ENSMUST00000071320.5:n.86+10953G>C	-	-	-	-	-	-	-	-	-1	-	MGI	-	-	5	-	-	-	-	-	-	-	-	-	-	-	-	-	-	-
TpB_UVA_UV560_VEP_ALL.xlsx	TpB	UVA	UV560	13:66795008-66795008	C	upstream_gene_variant	MODIFIER	Gm48413	ENSMUSG00000114314	Transcript	ENSMUST00000224105.1	processed_pseudogene	-	-	-	-	-	-	-	-	-	-	4289	1	-	MGI	-	-	-	-	-	-	-	-	-	-	-	-	-	-	-	-	-	-
TpB_UVA_UV560_VEP_ALL.xlsx	TpB	UVA	UV560	13:66802278-66802278	A	downstream_gene_variant	MODIFIER	Gm48413	ENSMUSG00000114314	Transcript	ENSMUST00000224105.1	processed_pseudogene	-	-	-	-	-	-	-	-	-	-	2888	1	-	MGI	-	-	-	-	-	-	-	-	-	-	-	-	-	-	-	-	-	-
TpB_UVA_UV560_VEP_ALL.xlsx	TpB	UVA	UV560	13:66802297-66802297	T	downstream_gene_variant	MODIFIER	Gm48413	ENSMUSG00000114314	Transcript	ENSMUST00000224105.1	processed_pseudogene	-	-	-	-	-	-	-	-	-	-	2907	1	-	MGI	-	-	-	-	-	-	-	-	-	-	-	-	-	-	-	-	-	-
TpB_UVA_UV560_VEP_ALL.xlsx	TpB	UVA	UV560	13:66852521-66852521	A	non_coding_transcript_exon_variant	MODIFIER	Gm10323	ENSMUSG00000114816	Transcript	ENSMUST00000224898.1	processed_pseudogene	03 of 03	-	ENSMUST00000224898.1:n.546G>T	-	546	-	-	-	-	-	-	-1	-	MGI	-	-	-	-	-	-	-	-	-	-	-	-	-	-	-	-	-	-
TpB_UVA_UV560_VEP_ALL.xlsx	TpB	UVA	UV560	13:67181812-67181812	A	missense_variant	MODERATE	Rsl1	ENSMUSG00000058900	Transcript	ENSMUST00000021997.7	protein_coding	04 of 04	-	ENSMUST00000021997.7:c.323C>A	ENSMUSP00000021997.6:p.Thr108Lys	359	323	108	T/K	aCa/aAa	-	-	1	-	MGI	-	-	1	P1	CCDS26613.1	ENSMUSP00000021997	-	Q7M6Y1	UPI000021CAA2	tolerated(0.84)	-	-	-	-	-	-	-	-
TpB_UVA_UV560_VEP_ALL.xlsx	TpB	UVA	UV560	13:67181812-67181812	A	3_prime_UTR_variant,NMD_transcript_variant	MODIFIER	Rsl1	ENSMUSG00000058900	Transcript	ENSMUST00000225334.1	nonsense_mediated_decay	04 of 04	-	ENSMUST00000225334.1:c.*255C>A	-	397	-	-	-	-	-	-	1	-	MGI	-	-	-	-	-	ENSMUSP00000153578	-	A0A286YDU4	UPI000BAD5A12	-	-	-	-	-	-	-	-	-
TpB_UVA_UV560_VEP_ALL.xlsx	TpB	UVA	UV560	13:67181957-67181957	T	synonymous_variant	LOW	Rsl1	ENSMUSG00000058900	Transcript	ENSMUST00000021997.7	protein_coding	04 of 04	-	ENSMUST00000021997.7:c.468C>T	ENSMUSP00000021997.6:p.Phe156%3D	504	468	156	F	ttC/ttT	-	-	1	-	MGI	-	-	1	P1	CCDS26613.1	ENSMUSP00000021997	-	Q7M6Y1	UPI000021CAA2	-	-	-	-	-	-	-	-	-
TpB_UVA_UV560_VEP_ALL.xlsx	TpB	UVA	UV560	13:67181957-67181957	T	downstream_gene_variant	MODIFIER	Rsl1	ENSMUSG00000058900	Transcript	ENSMUST00000225334.1	nonsense_mediated_decay	-	-	-	-	-	-	-	-	-	-	145	1	-	MGI	-	-	-	-	-	ENSMUSP00000153578	-	A0A286YDU4	UPI000BAD5A12	-	-	-	-	-	-	-	-	-
TpB_UVA_UV560_VEP_ALL.xlsx	TpB	UVA	UV560	13:67711146-67711146	G	intron_variant	MODIFIER	Zfp65	ENSMUSG00000071281	Transcript	ENSMUST00000073157.14	protein_coding	-	01 of 03	ENSMUST00000073157.14:c.7-139T>C	-	-	-	-	-	-	-	-	-1	-	MGI	-	-	1	P1	CCDS49303.1	ENSMUSP00000072900	-	Q91W94	UPI00000292B6	-	-	-	-	-	-	-	-	-
TpB_UVA_UV560_VEP_ALL.xlsx	TpB	UVA	UV560	13:67751581-67751581	A	intron_variant,non_coding_transcript_variant	MODIFIER	Zfp85os	ENSMUSG00000044081	Transcript	ENSMUST00000049518.4	antisense	-	01 of 02	ENSMUST00000049518.4:n.124-1373G>A	-	-	-	-	-	-	-	-	1	-	MGI	-	-	1	-	-	-	-	-	-	-	-	-	-	-	-	-	-	-
TpB_UVA_UV560_VEP_ALL.xlsx	TpB	UVA	UV560	13:67751630-67751630	G	intron_variant,non_coding_transcript_variant	MODIFIER	Zfp85os	ENSMUSG00000044081	Transcript	ENSMUST00000049518.4	antisense	-	01 of 02	ENSMUST00000049518.4:n.124-1324T>G	-	-	-	-	-	-	-	-	1	-	MGI	-	-	1	-	-	-	-	-	-	-	-	-	-	-	-	-	-	-
TpB_UVA_UV560_VEP_ALL.xlsx	TpB	UVA	UV560	13:67751630-67751630	G	missense_variant	MODERATE	Zfp85	ENSMUSG00000058331	Transcript	ENSMUST00000144183.2	protein_coding	03 of 04	-	ENSMUST00000144183.2:c.209A>C	ENSMUSP00000121202.2:p.Glu70Ala	369	209	70	E/A	gAa/gCa	-	-	-1	-	MGI	-	-	1	P1	CCDS36717.1	ENSMUSP00000121202	-	Q7TMC9	UPI00001B4B0D	tolerated(0.51)	-	-	-	-	-	-	-	-
TpB_UVA_UV560_VEP_ALL.xlsx	TpB	UVA	UV560	13:67822381-67822381	T	intron_variant	MODIFIER	Zfp273	ENSMUSG00000030446	Transcript	ENSMUST00000012725.7	protein_coding	-	02 of 03	ENSMUST00000012725.7:c.34+14C>T	-	-	-	-	-	-	-	-	1	-	MGI	-	-	1	-	-	ENSMUSP00000012725	-	F6UQD0	UPI0002A47781	-	-	-	-	-	-	-	-	-
TpB_UVA_UV560_VEP_ALL.xlsx	TpB	UVA	UV560	14:6675861-6675861	A	synonymous_variant	LOW	Gm10251	ENSMUSG00000094590	Transcript	ENSMUST00000178788.1	protein_coding	01 of 02	-	ENSMUST00000178788.1:c.24C>T	ENSMUSP00000137375.1:p.Thr8%3D	24	24	8	T	acC/acT	-	-	-1	-	MGI	-	-	5	P1	-	ENSMUSP00000137375	-	J3QPM5	UPI0000D63098	-	-	-	-	-	-	-	-	-
TpB_UVA_UV560_VEP_ALL.xlsx	TpB	UVA	UV560	14:34373824-34373824	G	intron_variant	MODIFIER	Sncg	ENSMUSG00000023064	Transcript	ENSMUST00000023826.4	protein_coding	-	01 of 04	ENSMUST00000023826.4:c.122-112A>C	-	-	-	-	-	-	-	-	-1	-	MGI	-	-	1	P1	CCDS26937.1	ENSMUSP00000023826	Q9Z0F7	Q5GQ64	UPI0000001A52	-	-	-	-	-	-	-	-	-
TpB_UVA_UV560_VEP_ALL.xlsx	TpB	UVA	UV560	15:101829542-101829542	T	intergenic_variant	MODIFIER	-	-	-	-	-	-	-	-	-	-	-	-	-	-	-	-	-	-	-	-	-	-	-	-	-	-	-	-	-	-	-	-	-	-	-	-	-
TpB_UVA_UV560_VEP_ALL.xlsx	TpB	UVA	UV560	17:32090437-32090437	T	non_coding_transcript_exon_variant	MODIFIER	Pdxk-ps	ENSMUSG00000002791	Transcript	ENSMUST00000159650.7	processed_transcript	01 of 09	-	ENSMUST00000159650.7:n.987G>A	-	987	-	-	-	-	-	-	-1	-	MGI	-	-	1	-	-	-	-	-	-	-	-	-	-	-	-	-	-	-
TpB_UVA_UV560_VEP_ALL.xlsx	TpB	UVA	UV560	17:91782904-91782904	T	non_coding_transcript_exon_variant	MODIFIER	Gm49993	ENSMUSG00000117408	Transcript	ENSMUST00000234065.1	processed_pseudogene	02 of 02	-	ENSMUST00000234065.1:n.213T>A	-	213	-	-	-	-	-	-	-1	-	MGI	-	-	-	-	-	-	-	-	-	-	-	-	-	-	-	-	-	-
TpB_UVA_UV560_VEP_ALL.xlsx	TpB	UVA	UV560	19:7693663-7693663	A	intron_variant	MODIFIER	Slc22a19	ENSMUSG00000024757	Transcript	ENSMUST00000025666.7	protein_coding	-	03 of 09	ENSMUST00000025666.7:c.661+23G>T	-	-	-	-	-	-	-	-	-1	-	MGI	-	-	1	P1	CCDS29532.1	ENSMUSP00000025666	Q8VCA0	-	UPI0000022422	-	-	-	-	-	-	-	-	-
TpB_UVA_UV560_VEP_ALL.xlsx	TpB	UVA	UV560	19:37413253-37413253	A	missense_variant	MODERATE	Kif11	ENSMUSG00000012443	Transcript	ENSMUST00000012587.3	protein_coding	19 of 22	-	ENSMUST00000012587.3:c.2677G>A	ENSMUSP00000012587.3:p.Gly893Arg	2868	2677	893	G/R	Gga/Aga	-	-	1	-	MGI	-	-	1	P1	CCDS29777.1	ENSMUSP00000012587	Q6P9P6	-	UPI00001E3ED9	tolerated(0.29)	-	-	-	-	-	-	-	-
TpB_UVA_UV560_VEP_ALL.xlsx	TpB	UVA	UV560	19:37413253-37413253	A	downstream_gene_variant	MODIFIER	Gm46649	ENSMUSG00000118211	Transcript	ENSMUST00000229520.2	processed_pseudogene	-	-	-	-	-	-	-	-	-	-	189	-1	-	MGI	-	-	-	-	-	-	-	-	-	-	-	-	-	-	-	-	-	-
TpB_UVA_UV560_VEP_ALL.xlsx	TpB	UVA	UV560	2:37543080-37543080	T	intron_variant	MODIFIER	Rabgap1	ENSMUSG00000035437	Transcript	ENSMUST00000061179.11	protein_coding	-	18 of 25	ENSMUST00000061179.11:c.2281-23G>T	-	-	-	-	-	-	-	-	1	-	MGI	-	-	1	P1	CCDS16002.1	ENSMUSP00000061624	A2AWA9	B2RRC5	UPI00001EEF90	-	-	-	-	-	-	-	-	-
TpB_UVA_UV560_VEP_ALL.xlsx	TpB	UVA	UV560	2:89439832-89439832	A	missense_variant	MODERATE	Olfr1240	ENSMUSG00000111174	Transcript	ENSMUST00000215362.1	protein_coding	01 of 01	-	ENSMUST00000215362.1:c.446G>T	ENSMUSP00000149973.1:p.Gly149Val	512	446	149	G/V	gGa/gTa	-	-	-1	-	MGI	-	-	-	P1	CCDS16380.1	ENSMUSP00000149973	-	Q8VG73	UPI0000024B0C	deleterious_low_confidence(0.03)	-	-	-	-	-	-	-	-
TpB_UVA_UV560_VEP_ALL.xlsx	TpB	UVA	UV560	2:130654755-130654755	T	intron_variant	MODIFIER	Ddrgk1	ENSMUSG00000068290	Transcript	ENSMUST00000089559.10	protein_coding	-	07 of 08	ENSMUST00000089559.10:c.733-45G>A	-	-	-	-	-	-	-	-	-1	-	MGI	-	-	1	P1	CCDS38243.1	ENSMUSP00000086988	Q80WW9	-	UPI00001D4713	-	-	-	-	-	-	-	-	-
TpB_UVA_UV560_VEP_ALL.xlsx	TpB	UVA	UV560	3:69731466-69731466	T	intron_variant	MODIFIER	Nmd3	ENSMUSG00000027787	Transcript	ENSMUST00000029358.14	protein_coding	-	06 of 15	ENSMUST00000029358.14:c.487-99G>T	-	-	-	-	-	-	-	-	1	-	MGI	-	-	1	P1	CCDS17407.1	ENSMUSP00000029358	Q99L48	-	UPI0000022CC7	-	-	-	-	-	-	-	-	-
TpB_UVA_UV560_VEP_ALL.xlsx	TpB	UVA	UV560	3:87759152-87759152	A	synonymous_variant	LOW	Pear1	ENSMUSG00000028073	Transcript	ENSMUST00000029714.14	protein_coding	04 of 23	-	ENSMUST00000029714.14:c.243C>T	ENSMUSP00000029714.8:p.Asp81%3D	349	243	81	D	gaC/gaT	-	-	-1	-	MGI	-	-	5	P1	CCDS38474.1	ENSMUSP00000029714	Q8VIK5	-	UPI00000E8885	-	-	-	-	-	-	-	-	-
TpB_UVA_UV560_VEP_ALL.xlsx	TpB	UVA	UV560	3:87759152-87759152	A	non_coding_transcript_exon_variant	MODIFIER	Pear1	ENSMUSG00000028073	Transcript	ENSMUST00000172631.7	retained_intron	04 of 21	-	ENSMUST00000172631.7:n.313C>T	-	313	-	-	-	-	-	-	-1	-	MGI	-	-	5	-	-	-	-	-	-	-	-	-	-	-	-	-	-	-
TpB_UVA_UV560_VEP_ALL.xlsx	TpB	UVA	UV560	4:76325166-76325166	A	intron_variant	MODIFIER	Ptprd	ENSMUSG00000028399	Transcript	ENSMUST00000050757.15	protein_coding	-	02 of 29	ENSMUST00000050757.15:c.64+14C>T	-	-	-	-	-	-	-	-	-1	-	MGI	-	-	5	-	-	ENSMUSP00000058466	-	E9Q7I7	UPI00021CF8E8	-	-	-	-	-	-	-	-	-
TpB_UVA_UV560_VEP_ALL.xlsx	TpB	UVA	UV560	4:146173880-146173880	G	intron_variant	MODIFIER	Zfp600	ENSMUSG00000066007	Transcript	ENSMUST00000092750.11	protein_coding	-	02 of 04	ENSMUST00000092750.11:c.-11+15429A>G	-	-	-	-	-	-	-	-	1	-	MGI	-	-	1	P1	CCDS51373.1	ENSMUSP00000090425	-	A2A7V0	UPI000059E208	-	-	-	-	-	-	-	-	-
TpB_UVA_UV560_VEP_ALL.xlsx	TpB	UVA	UV560	5:15620607-15620607	T	intron_variant	MODIFIER	Speer4d	ENSMUSG00000070933	Transcript	ENSMUST00000095006.8	protein_coding	-	02 of 04	ENSMUST00000095006.8:c.167+162A>T	-	-	-	-	-	-	-	-	1	-	MGI	-	-	1	P1	CCDS19095.1	ENSMUSP00000092615	-	L7N216	UPI000024F7B7	-	-	-	-	-	-	-	-	-
TpB_UVA_UV560_VEP_ALL.xlsx	TpB	UVA	UV560	5:27860862-27860862	G	upstream_gene_variant	MODIFIER	Gm43096	ENSMUSG00000104882	Transcript	ENSMUST00000196173.1	processed_pseudogene	-	-	-	-	-	-	-	-	-	-	424	-1	-	MGI	-	-	-	-	-	-	-	-	-	-	-	-	-	-	-	-	-	-
TpB_UVA_UV560_VEP_ALL.xlsx	TpB	UVA	UV560	5:34552794-34552794	T	missense_variant	MODERATE	Sh3bp2	ENSMUSG00000054520	Transcript	ENSMUST00000067638.13	protein_coding	03 of 13	-	ENSMUST00000067638.13:c.194C>T	ENSMUSP00000070890.7:p.Thr65Ile	254	194	65	T/I	aCa/aTa	-	-	1	-	MGI	-	-	1	P3	CCDS19215.1	ENSMUSP00000070890	-	Q5U3L0	UPI0000020B1F	deleterious(0.03)	-	-	-	-	-	-	-	-
TpB_UVA_UV560_VEP_ALL.xlsx	TpB	UVA	UV560	5:34552794-34552794	T	downstream_gene_variant	MODIFIER	Sh3bp2	ENSMUSG00000054520	Transcript	ENSMUST00000125817.7	protein_coding	-	-	-	-	-	-	-	-	-	-	1094	1	cds_end_NF	MGI	-	-	2	-	-	ENSMUSP00000123177	-	D3Z107	UPI000161182C	-	-	-	-	-	-	-	-	-
TpB_UVA_UV560_VEP_ALL.xlsx	TpB	UVA	UV560	5:72282239-72282239	T	missense_variant	MODERATE	Atp10d	ENSMUSG00000046808	Transcript	ENSMUST00000094710.7	protein_coding	02 of 07	-	ENSMUST00000094710.7:c.78G>T	ENSMUSP00000142749.1:p.Glu26Asp	209	78	26	E/D	gaG/gaT	-	-	1	-	MGI	-	-	5	P1	-	ENSMUSP00000142749	-	A0A0G2JEF2	UPI0000193CF1	tolerated(1)	-	-	-	-	-	-	-	-
TpB_UVA_UV560_VEP_ALL.xlsx	TpB	UVA	UV560	5:72282239-72282239	T	non_coding_transcript_exon_variant	MODIFIER	Atp10d	ENSMUSG00000046808	Transcript	ENSMUST00000136350.7	processed_transcript	08 of 12	-	ENSMUST00000136350.7:n.1200G>T	-	1200	-	-	-	-	-	-	1	-	MGI	-	-	1	-	-	-	-	-	-	-	-	-	-	-	-	-	-	-
TpB_UVA_UV560_VEP_ALL.xlsx	TpB	UVA	UV560	5:72282240-72282240	C	missense_variant	MODERATE	Atp10d	ENSMUSG00000046808	Transcript	ENSMUST00000094710.7	protein_coding	02 of 07	-	ENSMUST00000094710.7:c.79A>C	ENSMUSP00000142749.1:p.Lys27Gln	210	79	27	K/Q	Aaa/Caa	-	-	1	-	MGI	-	-	5	P1	-	ENSMUSP00000142749	-	A0A0G2JEF2	UPI0000193CF1	deleterious(0.01)	-	-	-	-	-	-	-	-
TpB_UVA_UV560_VEP_ALL.xlsx	TpB	UVA	UV560	5:72282240-72282240	C	non_coding_transcript_exon_variant	MODIFIER	Atp10d	ENSMUSG00000046808	Transcript	ENSMUST00000136350.7	processed_transcript	08 of 12	-	ENSMUST00000136350.7:n.1201A>C	-	1201	-	-	-	-	-	-	1	-	MGI	-	-	1	-	-	-	-	-	-	-	-	-	-	-	-	-	-	-
TpB_UVA_UV560_VEP_ALL.xlsx	TpB	UVA	UV560	5:90298187-90298187	G	intron_variant	MODIFIER	Ankrd17	ENSMUSG00000055204	Transcript	ENSMUST00000014421.14	protein_coding	-	04 of 01	ENSMUST00000014421.14:c.841-53A>C	-	-	-	-	-	-	-	-	-1	-	MGI	-	-	5	P4	CCDS57354.1	ENSMUSP00000014421	Q99NH0	-	UPI0000231D01	-	-	-	-	-	-	-	-	-
TpB_UVA_UV560_VEP_ALL.xlsx	TpB	UVA	UV560	5:123503772-123503772	T	missense_variant	MODERATE	Lrrc43	ENSMUSG00000063409	Transcript	ENSMUST00000094327.9	protein_coding	10 of 12	-	ENSMUST00000094327.9:c.1684C>T	ENSMUSP00000091885.3:p.Pro562Ser	1689	1684	562	P/S	Ccg/Tcg	-	-	1	-	MGI	-	-	1	P3	CCDS19664.1	ENSMUSP00000091885	Q3V0L5	-	UPI00005AB92B	tolerated(0.86)	-	-	-	-	-	-	-	-
TpB_UVA_UV560_VEP_ALL.xlsx	TpB	UVA	UV560	5:123503772-123503772	T	upstream_gene_variant	MODIFIER	Gm15751	ENSMUSG00000086753	Transcript	ENSMUST00000134552.1	sense_overlapping	-	-	-	-	-	-	-	-	-	-	4623	1	-	MGI	-	-	1	-	-	-	-	-	-	-	-	-	-	-	-	-	-	-
TpB_UVA_UV560_VEP_ALL.xlsx	TpB	UVA	UV560	5:151281520-151281520	C	non_coding_transcript_exon_variant	MODIFIER	Gm7041	ENSMUSG00000107154	Transcript	ENSMUST00000201227.1	processed_pseudogene	01 of 01	-	ENSMUST00000201227.1:n.398T>C	-	398	-	-	-	-	-	-	1	-	MGI	-	-	-	-	-	-	-	-	-	-	-	-	-	-	-	-	-	-
TpB_UVA_UV560_VEP_ALL.xlsx	TpB	UVA	UV560	6:68903286-68903286	C	downstream_gene_variant	MODIFIER	Igkv13-87	ENSMUSG00000079544	Transcript	ENSMUST00000114214.2	IG_V_pseudogene	-	-	-	-	-	-	-	-	-	-	20	1	-	MGI	-	-	-	-	-	-	-	-	-	-	-	-	-	-	-	-	-	-
TpB_UVA_UV560_VEP_ALL.xlsx	TpB	UVA	UV560	7:12797707-12797707	G	non_coding_transcript_exon_variant	MODIFIER	Gm45315	ENSMUSG00000109925	Transcript	ENSMUST00000209283.1	processed_pseudogene	01 of 01	-	ENSMUST00000209283.1:n.179A>G	-	179	-	-	-	-	-	-	1	-	MGI	-	-	-	-	-	-	-	-	-	-	-	-	-	-	-	-	-	-
TpB_UVA_UV560_VEP_ALL.xlsx	TpB	UVA	UV560	7:12797713-12797713	T	non_coding_transcript_exon_variant	MODIFIER	Gm45315	ENSMUSG00000109925	Transcript	ENSMUST00000209283.1	processed_pseudogene	01 of 01	-	ENSMUST00000209283.1:n.185C>T	-	185	-	-	-	-	-	-	1	-	MGI	-	-	-	-	-	-	-	-	-	-	-	-	-	-	-	-	-	-
TpB_UVA_UV560_VEP_ALL.xlsx	TpB	UVA	UV560	7:85558788-85558788	A	missense_variant	MODERATE	Vmn2r70	ENSMUSG00000090806	Transcript	ENSMUST00000168230.2	protein_coding	06 of 06	-	ENSMUST00000168230.2:c.2480A>T	ENSMUSP00000129703.1:p.Lys827Ile	2584	2480	827	K/I	aAa/aTa	-	-	-1	-	MGI	-	-	5	P2	CCDS52292.1	ENSMUSP00000129703	-	K7N702	UPI00015CFC18	deleterious(0)	-	-	-	-	-	-	-	-
TpB_UVA_UV560_VEP_ALL.xlsx	TpB	UVA	UV560	7:85558788-85558788	A	upstream_gene_variant	MODIFIER	Vmn2r71	ENSMUSG00000091205	Transcript	ENSMUST00000208545.2	processed_transcript	-	-	-	-	-	-	-	-	-	-	4299	1	-	MGI	-	-	3	-	-	-	-	-	-	-	-	-	-	-	-	-	-	-
TpB_UVA_UV560_VEP_ALL.xlsx	TpB	UVA	UV560	7:103841728-103841728	G	3_prime_UTR_variant	MODIFIER	Hbb-bh1	ENSMUSG00000052217	Transcript	ENSMUST00000063957.5	protein_coding	03 of 03	-	ENSMUST00000063957.5:c.*24T>C	-	522	-	-	-	-	-	-	-1	-	MGI	-	-	1	P1	CCDS21592.1	ENSMUSP00000064865	P04444	Q5EBL1	UPI0000003EEA	-	-	-	-	-	-	-	-	-
TpB_UVA_UV560_VEP_ALL.xlsx	TpB	UVA	UV560	9:4432748-4432748	T	intron_variant	MODIFIER	Gria4	ENSMUSG00000025892	Transcript	ENSMUST00000027020.12	protein_coding	-	15 of 16	ENSMUST00000027020.12:c.2409+25G>A	-	-	-	-	-	-	-	-	-1	-	MGI	-	-	5	A1	CCDS52715.1	ENSMUSP00000027020	-	G5E863	UPI000002272A	-	-	-	-	-	-	-	-	-
TpB_UVA_UV560_VEP_ALL.xlsx	TpB	UVA	UV560	9:55149640-55149640	T	synonymous_variant	LOW	Ube2q2	ENSMUSG00000032307	Transcript	ENSMUST00000059555.14	protein_coding	01 of 13	-	ENSMUST00000059555.14:c.6C>T	ENSMUSP00000059798.8:p.Ser2%3D	787	6	2	S	tcC/tcT	-	-	1	-	MGI	-	-	1	P3	CCDS23201.1	ENSMUSP00000059798	Q8K2Z8	-	UPI00005ACA31	-	-	-	-	-	-	-	-	-
TpB_UVA_UV560_VEP_ALL.xlsx	TpB	UVA	UV560	9:55149640-55149640	T	upstream_gene_variant	MODIFIER	Ube2q2	ENSMUSG00000032307	Transcript	ENSMUST00000122441.1	protein_coding	-	-	-	-	-	-	-	-	-	-	443	1	-	MGI	-	-	1	-	CCDS85678.1	ENSMUSP00000112745	Q8K2Z8	-	UPI00000EA874	-	-	-	-	-	-	-	-	-
TpB_UVA_UV560_VEP_ALL.xlsx	TpB	UVA	UV560	9:55149652-55149652	T	synonymous_variant	LOW	Ube2q2	ENSMUSG00000032307	Transcript	ENSMUST00000059555.14	protein_coding	01 of 13	-	ENSMUST00000059555.14:c.18C>T	ENSMUSP00000059798.8:p.Leu6%3D	799	18	6	L	ctC/ctT	-	-	1	-	MGI	-	-	1	P3	CCDS23201.1	ENSMUSP00000059798	Q8K2Z8	-	UPI00005ACA31	-	-	-	-	-	-	-	-	-
TpB_UVA_UV560_VEP_ALL.xlsx	TpB	UVA	UV560	9:55149652-55149652	T	upstream_gene_variant	MODIFIER	Ube2q2	ENSMUSG00000032307	Transcript	ENSMUST00000122441.1	protein_coding	-	-	-	-	-	-	-	-	-	-	431	1	-	MGI	-	-	1	-	CCDS85678.1	ENSMUSP00000112745	Q8K2Z8	-	UPI00000EA874	-	-	-	-	-	-	-	-	-
TpB_UVA_UV560_VEP_ALL.xlsx	TpB	UVA	UV560	9:55149697-55149697	A	missense_variant	MODERATE	Ube2q2	ENSMUSG00000032307	Transcript	ENSMUST00000059555.14	protein_coding	01 of 13	-	ENSMUST00000059555.14:c.63C>A	ENSMUSP00000059798.8:p.His21Gln	844	63	21	H/Q	caC/caA	-	-	1	-	MGI	-	-	1	P3	CCDS23201.1	ENSMUSP00000059798	Q8K2Z8	-	UPI00005ACA31	deleterious(0)	-	-	-	-	-	-	-	-
TpB_UVA_UV560_VEP_ALL.xlsx	TpB	UVA	UV560	9:55149697-55149697	A	upstream_gene_variant	MODIFIER	Ube2q2	ENSMUSG00000032307	Transcript	ENSMUST00000122441.1	protein_coding	-	-	-	-	-	-	-	-	-	-	386	1	-	MGI	-	-	1	-	CCDS85678.1	ENSMUSP00000112745	Q8K2Z8	-	UPI00000EA874	-	-	-	-	-	-	-	-	-
TpB_UVA_UV560_VEP_ALL.xlsx	TpB	UVA	UV560	9:55149730-55149730	G	missense_variant	MODERATE	Ube2q2	ENSMUSG00000032307	Transcript	ENSMUST00000059555.14	protein_coding	01 of 13	-	ENSMUST00000059555.14:c.96C>G	ENSMUSP00000059798.8:p.Asp32Glu	877	96	32	D/E	gaC/gaG	-	-	1	-	MGI	-	-	1	P3	CCDS23201.1	ENSMUSP00000059798	Q8K2Z8	-	UPI00005ACA31	deleterious(0)	-	-	-	-	-	-	-	-
TpB_UVA_UV560_VEP_ALL.xlsx	TpB	UVA	UV560	9:55149730-55149730	G	upstream_gene_variant	MODIFIER	Ube2q2	ENSMUSG00000032307	Transcript	ENSMUST00000122441.1	protein_coding	-	-	-	-	-	-	-	-	-	-	353	1	-	MGI	-	-	1	-	CCDS85678.1	ENSMUSP00000112745	Q8K2Z8	-	UPI00000EA874	-	-	-	-	-	-	-	-	-
TpB_UVA_UV560_VEP_ALL.xlsx	TpB	UVA	UV560	X:32092595-32092595	A	intergenic_variant	MODIFIER	-	-	-	-	-	-	-	-	-	-	-	-	-	-	-	-	-	-	-	-	-	-	-	-	-	-	-	-	-	-	-	-	-	-	-	-	-
TpB_UVA_UV560_VEP_ALL.xlsx	TpB	UVA	UV560	X:36922916-36922916	A	missense_variant	MODERATE	Septin6	ENSMUSG00000050379	Transcript	ENSMUST00000053456.10	protein_coding	09 of 11	-	ENSMUST00000053456.10:c.1204G>T	ENSMUSP00000054034.4:p.Ala402Ser	1452	1204	402	A/S	Gca/Tca	-	-	-1	-	MGI	-	-	1	A1	CCDS57749.1	ENSMUSP00000054034	Q9R1T4	-	UPI000002B366	tolerated(0.25)	-	-	-	-	-	-	-	-
TpB_UVA_UV560_VEP_ALL.xlsx	TpB	UVA	UV560	X:65132933-65132933	C	intergenic_variant	MODIFIER	-	-	-	-	-	-	-	-	-	-	-	-	-	-	-	-	-	-	-	-	-	-	-	-	-	-	-	-	-	-	-	-	-	-	-	-	-
TpB_UVA_UV560_VEP_ALL.xlsx	TpB	UVA	UV560	X:89005676-89005676	A	downstream_gene_variant	MODIFIER	Gm16412	ENSMUSG00000084060	Transcript	ENSMUST00000121602.1	processed_pseudogene	-	-	-	-	-	-	-	-	-	-	34	1	-	MGI	-	-	-	-	-	-	-	-	-	-	-	-	-	-	-	-	-	-
TpB_UVA_UV560_VEP_ALL.xlsx	TpB	UVA	UV560	X:104300167-104300167	A	missense_variant	MODERATE	Abcb7	ENSMUSG00000031333	Transcript	ENSMUST00000033695.5	protein_coding	11 of 16	-	ENSMUST00000033695.5:c.1412C>T	ENSMUSP00000033695.5:p.Thr471Met	1434	1412	471	T/M	aCg/aTg	-	-	-1	-	MGI	-	-	1	P1	CCDS53167.1	ENSMUSP00000033695	Q61102	-	UPI00001F8356	deleterious(0.01)	-	-	-	-	-	-	-	-
TpB_UVA_UV560_VEP_ALL.xlsx	TpB	UVA	UV560	X:113034347-113034347	A	non_coding_transcript_exon_variant	MODIFIER	Gm14939	ENSMUSG00000083560	Transcript	ENSMUST00000120347.1	processed_pseudogene	02 of 02	-	ENSMUST00000120347.1:n.526C>T	-	526	-	-	-	-	-	-	-1	-	MGI	-	-	-	-	-	-	-	-	-	-	-	-	-	-	-	-	-	-
TpB_UVA_UV560_VEP_ALL.xlsx	TpB	UVA	UV560	X:114592372-114592372	A	non_coding_transcript_exon_variant	MODIFIER	Gm1866	ENSMUSG00000082070	Transcript	ENSMUST00000120701.1	processed_pseudogene	01 of 01	-	ENSMUST00000120701.1:n.153A>T	-	153	-	-	-	-	-	-	-1	-	MGI	-	-	-	-	-	-	-	-	-	-	-	-	-	-	-	-	-	-
TpB_UVA_UV560_VEP_ALL.xlsx	TpB	UVA	UV560	Y:90761322-90761322	A	intron_variant,non_coding_transcript_variant	MODIFIER	Mid1-ps1	ENSMUSG00000095134	Transcript	ENSMUST00000167967.3	unprocessed_pseudogene	-	05 of 06	ENSMUST00000167967.3:n.691+708G>A	-	-	-	-	-	-	-	-	1	-	MGI	-	-	-	-	-	-	-	-	-	-	-	-	-	-	-	-	-	-
TpB_UVA_UV564_VEP_ALL.xlsx	TpB	UVA	UV564	1:85100855-85100855	T	downstream_gene_variant	MODIFIER	Gm10553	ENSMUSG00000073631	Transcript	ENSMUST00000097669.1	antisense	-	-	-	-	-	-	-	-	-	-	320	1	-	MGI	-	-	-	-	-	-	-	-	-	-	-	-	-	-	-	-	-	-
TpB_UVA_UV564_VEP_ALL.xlsx	TpB	UVA	UV564	1:85100855-85100855	T	intron_variant,non_coding_transcript_variant	MODIFIER	C130026I21Rik	ENSMUSG00000052477	Transcript	ENSMUST00000159114.1	processed_transcript	-	02 of 02	ENSMUST00000159114.1:n.170-107779C>A	-	-	-	-	-	-	-	-	-1	-	MGI	-	-	5	-	-	-	-	-	-	-	-	-	-	-	-	-	-	-
TpB_UVA_UV564_VEP_ALL.xlsx	TpB	UVA	UV564	1:85100855-85100855	T	intron_variant	MODIFIER	A530032D15Rik	ENSMUSG00000089844	Transcript	ENSMUST00000160792.7	protein_coding	-	01 of 06	ENSMUST00000160792.7:c.33-161C>A	-	-	-	-	-	-	-	-	-1	-	MGI	-	-	1	P2	CCDS15107.1	ENSMUSP00000125122	-	E9PV05	UPI0000D62D14	-	-	-	-	-	-	-	-	-
TpB_UVA_UV564_VEP_ALL.xlsx	TpB	UVA	UV564	1:85100855-85100855	T	intron_variant	MODIFIER	A530032D15Rik	ENSMUSG00000089844	Transcript	ENSMUST00000161675.2	protein_coding	-	02 of 03	ENSMUST00000161675.2:c.33-161C>A	-	-	-	-	-	-	-	-	-1	cds_end_NF	MGI	-	-	5	-	-	ENSMUSP00000123812	-	E9Q3M7	UPI0001611466	-	-	-	-	-	-	-	-	-
TpB_UVA_UV564_VEP_ALL.xlsx	TpB	UVA	UV564	1:85100855-85100855	T	intron_variant	MODIFIER	A530032D15Rik	ENSMUSG00000089844	Transcript	ENSMUST00000161724.7	protein_coding	-	01 of 07	ENSMUST00000161724.7:c.33-161C>A	-	-	-	-	-	-	-	-	-1	-	MGI	-	-	5	A2	-	ENSMUSP00000123750	-	E9Q422	UPI0000F4CD99	-	-	-	-	-	-	-	-	-
TpB_UVA_UV564_VEP_ALL.xlsx	TpB	UVA	UV564	1:85100855-85100855	T	non_coding_transcript_exon_variant	MODIFIER	Gm10553	ENSMUSG00000073631	Transcript	ENSMUST00000238757.1	antisense	01 of 01	-	ENSMUST00000238757.1:n.1344G>T	-	1344	-	-	-	-	-	-	1	-	MGI	-	-	-	-	-	-	-	-	-	-	-	-	-	-	-	-	-	-
TpB_UVA_UV564_VEP_ALL.xlsx	TpB	UVA	UV564	1:88305182-88305182	A	upstream_gene_variant	MODIFIER	Trpm8	ENSMUSG00000036251	Transcript	ENSMUST00000040210.13	protein_coding	-	-	-	-	-	-	-	-	-	-	1577	1	-	MGI	-	-	5	P1	CCDS48316.1	ENSMUSP00000036991	Q8R4D5	-	UPI0000028546	-	-	-	-	-	-	-	-	-
TpB_UVA_UV564_VEP_ALL.xlsx	TpB	UVA	UV564	1:88305182-88305182	A	intron_variant	MODIFIER	Trpm8	ENSMUSG00000036251	Transcript	ENSMUST00000113114.9	protein_coding	-	02 of 28	ENSMUST00000113114.9:c.-229+196G>A	-	-	-	-	-	-	-	-	1	-	MGI	-	-	1	P1	CCDS48316.1	ENSMUSP00000108739	Q8R4D5	-	UPI0000028546	-	-	-	-	-	-	-	-	-
TpB_UVA_UV564_VEP_ALL.xlsx	TpB	UVA	UV564	1:88305182-88305182	A	intron_variant,non_coding_transcript_variant	MODIFIER	Trpm8	ENSMUSG00000036251	Transcript	ENSMUST00000148138.7	processed_transcript	-	03 of 05	ENSMUST00000148138.7:n.280+196G>A	-	-	-	-	-	-	-	-	1	-	MGI	-	-	2	-	-	-	-	-	-	-	-	-	-	-	-	-	-	-
TpB_UVA_UV564_VEP_ALL.xlsx	TpB	UVA	UV564	1:88305182-88305182	A	regulatory_region_variant	MODIFIER	-	-	RegulatoryFeature	ENSMUSR00000484506	-	-	-	-	-	-	-	-	-	-	-	-	-	-	-	-	-	-	-	-	-	-	-	-	-	-	-	-	-	-	-	-	-
TpB_UVA_UV564_VEP_ALL.xlsx	TpB	UVA	UV564	1:111881205-111881205	T	non_coding_transcript_exon_variant	MODIFIER	Gm6028	ENSMUSG00000101875	Transcript	ENSMUST00000077111.4	processed_pseudogene	01 of 01	-	ENSMUST00000077111.4:n.104G>A	-	104	-	-	-	-	-	-	-1	-	MGI	-	-	-	-	-	-	-	-	-	-	-	-	-	-	-	-	-	-
TpB_UVA_UV564_VEP_ALL.xlsx	TpB	UVA	UV564	1:141257237-141257237	T	upstream_gene_variant	MODIFIER	Gm4845	ENSMUSG00000095238	Transcript	ENSMUST00000179202.2	processed_pseudogene	-	-	-	-	-	-	-	-	-	-	80	-1	-	MGI	-	-	-	-	-	-	-	-	-	-	-	-	-	-	-	-	-	-
TpB_UVA_UV564_VEP_ALL.xlsx	TpB	UVA	UV564	10:3956844-3956844	A	missense_variant	MODERATE	Plekhg1	ENSMUSG00000040624	Transcript	ENSMUST00000042438.12	protein_coding	15 of 16	-	ENSMUST00000042438.12:c.1760G>A	ENSMUSP00000040495.6:p.Arg587His	1926	1760	587	R/H	cGc/cAc	-	-	1	-	MGI	-	-	1	P2	CCDS56671.1	ENSMUSP00000040495	-	Q3UX37	UPI00005ABC0F	deleterious(0)	-	-	-	-	-	-	-	-
TpB_UVA_UV564_VEP_ALL.xlsx	TpB	UVA	UV564	10:3956844-3956844	A	missense_variant	MODERATE	Plekhg1	ENSMUSG00000040624	Transcript	ENSMUST00000120274.7	protein_coding	16 of 17	-	ENSMUST00000120274.7:c.1760G>A	ENSMUSP00000114056.1:p.Arg587His	2105	1760	587	R/H	cGc/cAc	-	-	1	-	MGI	-	-	5	P2	CCDS56671.1	ENSMUSP00000114056	-	Q3UX37	UPI00005ABC0F	deleterious(0)	-	-	-	-	-	-	-	-
TpB_UVA_UV564_VEP_ALL.xlsx	TpB	UVA	UV564	10:3956844-3956844	A	missense_variant	MODERATE	Plekhg1	ENSMUSG00000040624	Transcript	ENSMUST00000136671.7	protein_coding	15 of 16	-	ENSMUST00000136671.7:c.1928G>A	ENSMUSP00000119950.1:p.Arg643His	1926	1928	643	R/H	cGc/cAc	-	-	1	cds_start_NF	MGI	-	-	1	-	-	ENSMUSP00000119950	-	F6S200	UPI000164C55E	deleterious(0)	-	-	-	-	-	-	-	-
TpB_UVA_UV564_VEP_ALL.xlsx	TpB	UVA	UV564	10:3956844-3956844	A	upstream_gene_variant	MODIFIER	Plekhg1	ENSMUSG00000040624	Transcript	ENSMUST00000141367.1	nonsense_mediated_decay	-	-	-	-	-	-	-	-	-	-	1047	1	cds_start_NF	MGI	-	-	3	-	-	ENSMUSP00000116652	-	F7CES2	UPI000164C562	-	-	-	-	-	-	-	-	-
TpB_UVA_UV564_VEP_ALL.xlsx	TpB	UVA	UV564	10:3956844-3956844	A	missense_variant	MODERATE	Plekhg1	ENSMUSG00000040624	Transcript	ENSMUST00000154727.1	protein_coding	13 of 15	-	ENSMUST00000154727.1:c.1325G>A	ENSMUSP00000122131.1:p.Arg442His	1323	1325	442	R/H	cGc/cAc	-	-	1	cds_start_NF	MGI	-	-	5	-	-	ENSMUSP00000122131	-	F7C583	UPI000164C561	deleterious(0)	-	-	-	-	-	-	-	-
TpB_UVA_UV564_VEP_ALL.xlsx	TpB	UVA	UV564	10:3956844-3956844	A	missense_variant	MODERATE	Plekhg1	ENSMUSG00000040624	Transcript	ENSMUST00000239159.1	protein_coding	15 of 16	-	ENSMUST00000239159.1:c.1985G>A	ENSMUSP00000159056.1:p.Arg662His	2065	1985	662	R/H	cGc/cAc	-	-	1	-	MGI	-	-	-	A2	-	ENSMUSP00000159056	-	A0A5F8MPP0	UPI001235E4E8	deleterious(0)	-	-	-	-	-	-	-	-
TpB_UVA_UV564_VEP_ALL.xlsx	TpB	UVA	UV564	10:3956844-3956844	A	regulatory_region_variant	MODIFIER	-	-	RegulatoryFeature	ENSMUSR00000496677	-	-	-	-	-	-	-	-	-	-	-	-	-	-	-	-	-	-	-	-	-	-	-	-	-	-	-	-	-	-	-	-	-
TpB_UVA_UV564_VEP_ALL.xlsx	TpB	UVA	UV564	10:11080357-11080357	C	missense_variant	MODERATE	Grm1	ENSMUSG00000019828	Transcript	ENSMUST00000044306.12	protein_coding	02 of 09	-	ENSMUST00000044306.12:c.182A>G	ENSMUSP00000037255.6:p.Lys61Arg	608	182	61	K/R	aAg/aGg	-	-	-1	-	MGI	-	-	1	-	CCDS23696.1	ENSMUSP00000037255	P97772	-	UPI000002739B	tolerated(0.11)	-	-	-	-	-	-	-	-
TpB_UVA_UV564_VEP_ALL.xlsx	TpB	UVA	UV564	10:11080357-11080357	C	missense_variant	MODERATE	Grm1	ENSMUSG00000019828	Transcript	ENSMUST00000105560.1	protein_coding	01 of 09	-	ENSMUST00000105560.1:c.182A>G	ENSMUSP00000101189.1:p.Lys61Arg	600	182	61	K/R	aAg/aGg	-	-	-1	-	MGI	-	-	1	P1	CCDS48499.1	ENSMUSP00000101189	P97772	-	UPI000018DB8E	tolerated(0.15)	-	-	-	-	-	-	-	-
TpB_UVA_UV564_VEP_ALL.xlsx	TpB	UVA	UV564	10:11080357-11080357	C	missense_variant	MODERATE	Grm1	ENSMUSG00000019828	Transcript	ENSMUST00000105561.8	protein_coding	02 of 10	-	ENSMUST00000105561.8:c.182A>G	ENSMUSP00000101190.2:p.Lys61Arg	557	182	61	K/R	aAg/aGg	-	-	-1	-	MGI	-	-	1	P1	CCDS48499.1	ENSMUSP00000101190	P97772	-	UPI000018DB8E	tolerated(0.15)	-	-	-	-	-	-	-	-
TpB_UVA_UV564_VEP_ALL.xlsx	TpB	UVA	UV564	10:11080357-11080357	C	downstream_gene_variant	MODIFIER	Grm1	ENSMUSG00000019828	Transcript	ENSMUST00000156826.1	processed_transcript	-	-	-	-	-	-	-	-	-	-	132	-1	-	MGI	-	-	3	-	-	-	-	-	-	-	-	-	-	-	-	-	-	-
TpB_UVA_UV564_VEP_ALL.xlsx	TpB	UVA	UV564	10:11080357-11080357	C	regulatory_region_variant	MODIFIER	-	-	RegulatoryFeature	ENSMUSR00000497475	-	-	-	-	-	-	-	-	-	-	-	-	-	-	-	-	-	-	-	-	-	-	-	-	-	-	-	-	-	-	-	-	-
TpB_UVA_UV564_VEP_ALL.xlsx	TpB	UVA	UV564	10:27616753-27616753	T	missense_variant	MODERATE	Lama2	ENSMUSG00000019899	Transcript	ENSMUST00000092639.11	protein_coding	01 of 01	-	ENSMUST00000092639.11:c.44G>A	ENSMUSP00000090304.5:p.Gly15Glu	91	44	15	G/E	gGg/gAg	-	-	-1	-	MGI	-	-	5	P1	CCDS48526.1	ENSMUSP00000090304	Q60675	-	UPI0000E6A55D	tolerated_low_confidence(0.13)	-	-	-	-	-	-	-	-
TpB_UVA_UV564_VEP_ALL.xlsx	TpB	UVA	UV564	10:27616753-27616753	T	non_coding_transcript_exon_variant	MODIFIER	Lama2	ENSMUSG00000019899	Transcript	ENSMUST00000185839.6	retained_intron	01 of 14	-	ENSMUST00000185839.6:n.190G>A	-	190	-	-	-	-	-	-	-1	-	MGI	-	-	1	-	-	-	-	-	-	-	-	-	-	-	-	-	-	-
TpB_UVA_UV564_VEP_ALL.xlsx	TpB	UVA	UV564	10:27616753-27616753	T	non_coding_transcript_exon_variant	MODIFIER	Lama2	ENSMUSG00000019899	Transcript	ENSMUST00000186965.6	retained_intron	01 of 10	-	ENSMUST00000186965.6:n.114G>A	-	114	-	-	-	-	-	-	-1	-	MGI	-	-	1	-	-	-	-	-	-	-	-	-	-	-	-	-	-	-
TpB_UVA_UV564_VEP_ALL.xlsx	TpB	UVA	UV564	10:27616753-27616753	T	non_coding_transcript_exon_variant	MODIFIER	Lama2	ENSMUSG00000019899	Transcript	ENSMUST00000187535.1	processed_transcript	01 of 02	-	ENSMUST00000187535.1:n.114G>A	-	114	-	-	-	-	-	-	-1	-	MGI	-	-	1	-	-	-	-	-	-	-	-	-	-	-	-	-	-	-
TpB_UVA_UV564_VEP_ALL.xlsx	TpB	UVA	UV564	10:27616753-27616753	T	intron_variant,non_coding_transcript_variant	MODIFIER	Lama2	ENSMUSG00000019899	Transcript	ENSMUST00000188963.1	retained_intron	-	01 of 03	ENSMUST00000188963.1:n.36+2970G>A	-	-	-	-	-	-	-	-	-1	-	MGI	-	-	3	-	-	-	-	-	-	-	-	-	-	-	-	-	-	-
TpB_UVA_UV564_VEP_ALL.xlsx	TpB	UVA	UV564	10:27616753-27616753	T	missense_variant	MODERATE	Lama2	ENSMUSG00000019899	Transcript	ENSMUST00000189575.1	protein_coding	01 of 27	-	ENSMUST00000189575.1:c.44G>A	ENSMUSP00000140716.1:p.Gly15Glu	44	44	15	G/E	gGg/gAg	-	-	-1	-	MGI	-	-	5	-	-	ENSMUSP00000140716	-	A0A087WRP2	UPI00004712AD	tolerated(0.1)	-	-	-	-	-	-	-	-
TpB_UVA_UV564_VEP_ALL.xlsx	TpB	UVA	UV564	10:27616753-27616753	T	upstream_gene_variant	MODIFIER	Gm36962	ENSMUSG00000103931	Transcript	ENSMUST00000192114.1	TEC	-	-	-	-	-	-	-	-	-	-	1425	-1	-	MGI	-	-	-	-	-	-	-	-	-	-	-	-	-	-	-	-	-	-
TpB_UVA_UV564_VEP_ALL.xlsx	TpB	UVA	UV564	10:27616753-27616753	T	regulatory_region_variant	MODIFIER	-	-	RegulatoryFeature	ENSMUSR00000024334	-	-	-	-	-	-	-	-	-	-	-	-	-	-	-	-	-	-	-	-	-	-	-	-	-	-	-	-	-	-	-	-	-
TpB_UVA_UV564_VEP_ALL.xlsx	TpB	UVA	UV564	10:95973598-95973598	T	intron_variant	MODIFIER	Eea1	ENSMUSG00000036499	Transcript	ENSMUST00000053484.7	protein_coding	-	01 of 28	ENSMUST00000053484.7:c.25-388G>T	-	-	-	-	-	-	-	-	1	-	MGI	-	-	1	P1	CCDS36042.1	ENSMUSP00000061493	Q8BL66	-	UPI00003BA2F9	-	-	-	-	-	-	-	-	-
TpB_UVA_UV564_VEP_ALL.xlsx	TpB	UVA	UV564	10:95973598-95973598	T	intron_variant,non_coding_transcript_variant	MODIFIER	Eea1	ENSMUSG00000036499	Transcript	ENSMUST00000218088.1	processed_transcript	-	01 of 19	ENSMUST00000218088.1:n.266-388G>T	-	-	-	-	-	-	-	-	1	-	MGI	-	-	1	-	-	-	-	-	-	-	-	-	-	-	-	-	-	-
TpB_UVA_UV564_VEP_ALL.xlsx	TpB	UVA	UV564	10:95973598-95973598	T	intron_variant,NMD_transcript_variant	MODIFIER	Eea1	ENSMUSG00000036499	Transcript	ENSMUST00000218291.1	nonsense_mediated_decay	-	01 of 17	ENSMUST00000218291.1:c.25-388G>T	-	-	-	-	-	-	-	-	1	-	MGI	-	-	1	-	-	ENSMUSP00000151703	-	A0A1W2P7K1	UPI00097CE265	-	-	-	-	-	-	-	-	-
TpB_UVA_UV564_VEP_ALL.xlsx	TpB	UVA	UV564	10:95973598-95973598	T	intron_variant,NMD_transcript_variant	MODIFIER	Eea1	ENSMUSG00000036499	Transcript	ENSMUST00000218517.1	nonsense_mediated_decay	-	01 of 09	ENSMUST00000218517.1:c.25-388G>T	-	-	-	-	-	-	-	-	1	-	MGI	-	-	1	-	-	ENSMUSP00000151611	-	A0A1W2P7A6	UPI00001C4853	-	-	-	-	-	-	-	-	-
TpB_UVA_UV564_VEP_ALL.xlsx	TpB	UVA	UV564	10:95973598-95973598	T	intron_variant,non_coding_transcript_variant	MODIFIER	Eea1	ENSMUSG00000036499	Transcript	ENSMUST00000219207.1	retained_intron	-	01 of 01	ENSMUST00000219207.1:n.324-388G>T	-	-	-	-	-	-	-	-	1	-	MGI	-	-	1	-	-	-	-	-	-	-	-	-	-	-	-	-	-	-
TpB_UVA_UV564_VEP_ALL.xlsx	TpB	UVA	UV564	11:3193429-3193429	T	5_prime_UTR_variant	MODIFIER	Sfi1	ENSMUSG00000023764	Transcript	ENSMUST00000066391.13	protein_coding	01 of 01	-	ENSMUST00000066391.13:c.-163C>A	-	35	-	-	-	-	-	-	-1	-	MGI	-	-	5	A2	-	ENSMUSP00000067261	Q3UZY0	-	UPI0000470E52	-	-	-	-	-	-	-	-	-
TpB_UVA_UV564_VEP_ALL.xlsx	TpB	UVA	UV564	11:3193429-3193429	T	upstream_gene_variant	MODIFIER	Sfi1	ENSMUSG00000023764	Transcript	ENSMUST00000081318.12	protein_coding	-	-	-	-	-	-	-	-	-	-	22	-1	-	MGI	-	-	1	P2	CCDS36094.1	ENSMUSP00000080066	Q3UZY0	-	UPI00005AB9B2	-	-	-	-	-	-	-	-	-
TpB_UVA_UV564_VEP_ALL.xlsx	TpB	UVA	UV564	11:3193429-3193429	T	upstream_gene_variant	MODIFIER	Sfi1	ENSMUSG00000023764	Transcript	ENSMUST00000101655.9	protein_coding	-	-	-	-	-	-	-	-	-	-	4373	-1	-	MGI	-	-	5	A2	-	ENSMUSP00000099178	-	E9QJT8	UPI0001F78C2A	-	-	-	-	-	-	-	-	-
TpB_UVA_UV564_VEP_ALL.xlsx	TpB	UVA	UV564	11:3193429-3193429	T	upstream_gene_variant	MODIFIER	Sfi1	ENSMUSG00000023764	Transcript	ENSMUST00000118627.1	protein_coding	-	-	-	-	-	-	-	-	-	-	5	-1	-	MGI	-	-	1	A2	-	ENSMUSP00000113559	-	A8Y5K5	UPI00015F3B61	-	-	-	-	-	-	-	-	-
TpB_UVA_UV564_VEP_ALL.xlsx	TpB	UVA	UV564	11:3193429-3193429	T	downstream_gene_variant	MODIFIER	Fau-ps2	ENSMUSG00000082658	Transcript	ENSMUST00000119333.1	processed_pseudogene	-	-	-	-	-	-	-	-	-	-	3025	-1	-	MGI	-	-	-	-	-	-	-	-	-	-	-	-	-	-	-	-	-	-
TpB_UVA_UV564_VEP_ALL.xlsx	TpB	UVA	UV564	11:3193429-3193429	T	5_prime_UTR_variant,NMD_transcript_variant	MODIFIER	Sfi1	ENSMUSG00000023764	Transcript	ENSMUST00000132893.7	nonsense_mediated_decay	01 of 22	-	ENSMUST00000132893.7:c.-163C>A	-	32	-	-	-	-	-	-	-1	-	MGI	-	-	5	-	-	ENSMUSP00000118419	-	E9PY38	UPI000161149D	-	-	-	-	-	-	-	-	-
TpB_UVA_UV564_VEP_ALL.xlsx	TpB	UVA	UV564	11:3193429-3193429	T	upstream_gene_variant	MODIFIER	Sfi1	ENSMUSG00000023764	Transcript	ENSMUST00000138126.7	retained_intron	-	-	-	-	-	-	-	-	-	-	8	-1	-	MGI	-	-	1	-	-	-	-	-	-	-	-	-	-	-	-	-	-	-
TpB_UVA_UV564_VEP_ALL.xlsx	TpB	UVA	UV564	11:3193429-3193429	T	upstream_gene_variant	MODIFIER	Sfi1	ENSMUSG00000023764	Transcript	ENSMUST00000140846.8	protein_coding	-	-	-	-	-	-	-	-	-	-	4377	-1	-	MGI	-	-	5	A2	-	ENSMUSP00000119905	-	E9Q799	UPI0001F78C31	-	-	-	-	-	-	-	-	-
TpB_UVA_UV564_VEP_ALL.xlsx	TpB	UVA	UV564	11:3193429-3193429	T	upstream_gene_variant	MODIFIER	Sfi1	ENSMUSG00000023764	Transcript	ENSMUST00000142315.7	protein_coding	-	-	-	-	-	-	-	-	-	-	5	-1	cds_end_NF	MGI	-	-	5	-	-	ENSMUSP00000118364	-	A8Y5K4	UPI00015F3B60	-	-	-	-	-	-	-	-	-
TpB_UVA_UV564_VEP_ALL.xlsx	TpB	UVA	UV564	11:3193429-3193429	T	upstream_gene_variant	MODIFIER	Sfi1	ENSMUSG00000023764	Transcript	ENSMUST00000144359.7	retained_intron	-	-	-	-	-	-	-	-	-	-	18	-1	-	MGI	-	-	2	-	-	-	-	-	-	-	-	-	-	-	-	-	-	-
TpB_UVA_UV564_VEP_ALL.xlsx	TpB	UVA	UV564	11:3193429-3193429	T	non_coding_transcript_exon_variant	MODIFIER	Sfi1	ENSMUSG00000023764	Transcript	ENSMUST00000144778.7	retained_intron	01 of 30	-	ENSMUST00000144778.7:n.11C>A	-	11	-	-	-	-	-	-	-1	-	MGI	-	-	1	-	-	-	-	-	-	-	-	-	-	-	-	-	-	-
TpB_UVA_UV564_VEP_ALL.xlsx	TpB	UVA	UV564	11:3193429-3193429	T	downstream_gene_variant	MODIFIER	Gm12735	ENSMUSG00000086049	Transcript	ENSMUST00000146218.1	antisense	-	-	-	-	-	-	-	-	-	-	87	-1	-	MGI	-	-	1	-	-	-	-	-	-	-	-	-	-	-	-	-	-	-
TpB_UVA_UV564_VEP_ALL.xlsx	TpB	UVA	UV564	11:3193429-3193429	T	upstream_gene_variant	MODIFIER	Sfi1	ENSMUSG00000023764	Transcript	ENSMUST00000153425.8	protein_coding	-	-	-	-	-	-	-	-	-	-	4373	-1	-	MGI	-	-	5	A2	-	ENSMUSP00000121719	-	E9Q8V3	UPI0001F78C30	-	-	-	-	-	-	-	-	-
TpB_UVA_UV564_VEP_ALL.xlsx	TpB	UVA	UV564	11:3193429-3193429	T	intron_variant,NMD_transcript_variant	MODIFIER	Drg1	ENSMUSG00000020457	Transcript	ENSMUST00000159304.7	nonsense_mediated_decay	-	02 of 03	ENSMUST00000159304.7:c.166-4373C>A	-	-	-	-	-	-	-	-	-1	cds_start_NF	MGI	-	-	5	-	-	ENSMUSP00000125536	-	F7BQ65	UPI0001DD35F6	-	-	-	-	-	-	-	-	-
TpB_UVA_UV564_VEP_ALL.xlsx	TpB	UVA	UV564	11:3193429-3193429	T	regulatory_region_variant	MODIFIER	-	-	RegulatoryFeature	ENSMUSR00000315926	-	-	-	-	-	-	-	-	-	-	-	-	-	-	-	-	-	-	-	-	-	-	-	-	-	-	-	-	-	-	-	-	-
TpB_UVA_UV564_VEP_ALL.xlsx	TpB	UVA	UV564	11:33152704-33152704	G	3_prime_UTR_variant	MODIFIER	Npm1	ENSMUSG00000057113	Transcript	ENSMUST00000075641.9	protein_coding	11 of 11	-	ENSMUST00000075641.9:c.*110A>C	-	1216	-	-	-	-	-	-	-1	-	MGI	-	-	1	P1	CCDS24532.1	ENSMUSP00000075067	Q61937	Q5SQB7	UPI0000003F61	-	-	-	-	-	-	-	-	-
TpB_UVA_UV564_VEP_ALL.xlsx	TpB	UVA	UV564	11:33152704-33152704	G	3_prime_UTR_variant	MODIFIER	Npm1	ENSMUSG00000057113	Transcript	ENSMUST00000093201.12	protein_coding	10 of 10	-	ENSMUST00000093201.12:c.*110A>C	-	998	-	-	-	-	-	-	-1	-	MGI	-	-	5	-	-	ENSMUSP00000090891	-	Q5SQB0	UPI0000470594	-	-	-	-	-	-	-	-	-
TpB_UVA_UV564_VEP_ALL.xlsx	TpB	UVA	UV564	11:33152704-33152704	G	downstream_gene_variant	MODIFIER	Npm1	ENSMUSG00000057113	Transcript	ENSMUST00000101375.4	protein_coding	-	-	-	-	-	-	-	-	-	-	2624	-1	-	MGI	-	-	1	-	-	ENSMUSP00000098926	-	Q5SQB5	UPI00000244DA	-	-	-	-	-	-	-	-	-
TpB_UVA_UV564_VEP_ALL.xlsx	TpB	UVA	UV564	11:33152704-33152704	G	downstream_gene_variant	MODIFIER	Npm1	ENSMUSG00000057113	Transcript	ENSMUST00000109354.9	protein_coding	-	-	-	-	-	-	-	-	-	-	2223	-1	-	MGI	-	-	1	-	CCDS56765.1	ENSMUSP00000104978	-	Q9DAY9	UPI00000E887F	-	-	-	-	-	-	-	-	-
TpB_UVA_UV564_VEP_ALL.xlsx	TpB	UVA	UV564	11:33152704-33152704	G	non_coding_transcript_exon_variant	MODIFIER	Npm1	ENSMUSG00000057113	Transcript	ENSMUST00000141881.1	processed_transcript	02 of 02	-	ENSMUST00000141881.1:n.629A>C	-	629	-	-	-	-	-	-	-1	-	MGI	-	-	2	-	-	-	-	-	-	-	-	-	-	-	-	-	-	-
TpB_UVA_UV564_VEP_ALL.xlsx	TpB	UVA	UV564	11:33152704-33152704	G	downstream_gene_variant	MODIFIER	Npm1	ENSMUSG00000057113	Transcript	ENSMUST00000146759.1	processed_transcript	-	-	-	-	-	-	-	-	-	-	3322	-1	-	MGI	-	-	2	-	-	-	-	-	-	-	-	-	-	-	-	-	-	-
TpB_UVA_UV564_VEP_ALL.xlsx	TpB	UVA	UV564	11:97686476-97686476	T	downstream_gene_variant	MODIFIER	Pcgf2	ENSMUSG00000018537	Transcript	ENSMUST00000018681.13	protein_coding	-	-	-	-	-	-	-	-	-	-	3344	-1	-	MGI	-	-	1	P1	CCDS25327.1	ENSMUSP00000018681	P23798	-	UPI0000029DB1	-	-	-	-	-	-	-	-	-
TpB_UVA_UV564_VEP_ALL.xlsx	TpB	UVA	UV564	11:97686476-97686476	T	downstream_gene_variant	MODIFIER	Mllt6	ENSMUSG00000038437	Transcript	ENSMUST00000044730.11	protein_coding	-	-	-	-	-	-	-	-	-	-	1013	1	-	MGI	-	-	1	P2	CCDS25323.1	ENSMUSP00000045445	-	B1AR09	UPI0000193C0F	-	-	-	-	-	-	-	-	-
TpB_UVA_UV564_VEP_ALL.xlsx	TpB	UVA	UV564	11:97686476-97686476	T	downstream_gene_variant	MODIFIER	Pcgf2	ENSMUSG00000018537	Transcript	ENSMUST00000103148.7	protein_coding	-	-	-	-	-	-	-	-	-	-	3344	-1	-	MGI	-	-	5	P1	CCDS25327.1	ENSMUSP00000099437	P23798	-	UPI0000029DB1	-	-	-	-	-	-	-	-	-
TpB_UVA_UV564_VEP_ALL.xlsx	TpB	UVA	UV564	11:97686476-97686476	T	downstream_gene_variant	MODIFIER	Pcgf2	ENSMUSG00000018537	Transcript	ENSMUST00000103149.8	protein_coding	-	-	-	-	-	-	-	-	-	-	3316	-1	-	MGI	-	-	5	-	-	ENSMUSP00000099438	-	B1AR14	UPI00001CB17D	-	-	-	-	-	-	-	-	-
TpB_UVA_UV564_VEP_ALL.xlsx	TpB	UVA	UV564	11:97686476-97686476	T	intron_variant	MODIFIER	Cisd3	ENSMUSG00000078695	Transcript	ENSMUST00000107583.2	protein_coding	-	01 of 02	ENSMUST00000107583.2:c.115-25A>T	-	-	-	-	-	-	-	-	1	-	MGI	-	-	1	P2	CCDS48896.1	ENSMUSP00000103209	B1AR13	-	UPI00001C4C6C	-	-	-	-	-	-	-	-	-
TpB_UVA_UV564_VEP_ALL.xlsx	TpB	UVA	UV564	11:97686476-97686476	T	intron_variant	MODIFIER	Cisd3	ENSMUSG00000078695	Transcript	ENSMUST00000107584.7	protein_coding	-	02 of 03	ENSMUST00000107584.7:c.49-25A>T	-	-	-	-	-	-	-	-	1	-	MGI	-	-	1	A2	-	ENSMUSP00000103210	-	Z4YKM2	UPI000059DCE3	-	-	-	-	-	-	-	-	-
TpB_UVA_UV564_VEP_ALL.xlsx	TpB	UVA	UV564	11:97686476-97686476	T	intron_variant	MODIFIER	Cisd3	ENSMUSG00000078695	Transcript	ENSMUST00000107585.8	protein_coding	-	02 of 03	ENSMUST00000107585.8:c.106-25A>T	-	-	-	-	-	-	-	-	1	-	MGI	-	-	1	A2	-	ENSMUSP00000103211	-	B2RWE3	UPI00001E4749	-	-	-	-	-	-	-	-	-
TpB_UVA_UV564_VEP_ALL.xlsx	TpB	UVA	UV564	11:97686476-97686476	T	downstream_gene_variant	MODIFIER	Mllt6	ENSMUSG00000038437	Transcript	ENSMUST00000107586.2	protein_coding	-	-	-	-	-	-	-	-	-	-	1013	1	-	MGI	-	-	5	A2	-	ENSMUSP00000103212	-	B1AR10	UPI000059DCE2	-	-	-	-	-	-	-	-	-
TpB_UVA_UV564_VEP_ALL.xlsx	TpB	UVA	UV564	11:97686476-97686476	T	downstream_gene_variant	MODIFIER	Pcgf2	ENSMUSG00000018537	Transcript	ENSMUST00000134003.1	processed_transcript	-	-	-	-	-	-	-	-	-	-	4052	-1	-	MGI	-	-	3	-	-	-	-	-	-	-	-	-	-	-	-	-	-	-
TpB_UVA_UV564_VEP_ALL.xlsx	TpB	UVA	UV564	11:97686476-97686476	T	downstream_gene_variant	MODIFIER	Cisd3	ENSMUSG00000078695	Transcript	ENSMUST00000145623.1	processed_transcript	-	-	-	-	-	-	-	-	-	-	261	1	-	MGI	-	-	3	-	-	-	-	-	-	-	-	-	-	-	-	-	-	-
TpB_UVA_UV564_VEP_ALL.xlsx	TpB	UVA	UV564	11:97686476-97686476	T	downstream_gene_variant	MODIFIER	Mllt6	ENSMUSG00000038437	Transcript	ENSMUST00000155835.7	processed_transcript	-	-	-	-	-	-	-	-	-	-	3945	1	-	MGI	-	-	5	-	-	-	-	-	-	-	-	-	-	-	-	-	-	-
TpB_UVA_UV564_VEP_ALL.xlsx	TpB	UVA	UV564	11:97686476-97686476	T	downstream_gene_variant	MODIFIER	Pcgf2	ENSMUSG00000018537	Transcript	ENSMUST00000169807.7	protein_coding	-	-	-	-	-	-	-	-	-	-	2347	-1	-	MGI	-	-	1	P1	CCDS25327.1	ENSMUSP00000126967	P23798	-	UPI0000029DB1	-	-	-	-	-	-	-	-	-
TpB_UVA_UV564_VEP_ALL.xlsx	TpB	UVA	UV564	11:97686476-97686476	T	downstream_gene_variant	MODIFIER	Pcgf2	ENSMUSG00000018537	Transcript	ENSMUST00000179765.7	protein_coding	-	-	-	-	-	-	-	-	-	-	2347	-1	-	MGI	-	-	1	P1	CCDS25327.1	ENSMUSP00000137517	P23798	-	UPI0000029DB1	-	-	-	-	-	-	-	-	-
TpB_UVA_UV564_VEP_ALL.xlsx	TpB	UVA	UV564	11:97686476-97686476	T	regulatory_region_variant	MODIFIER	-	-	RegulatoryFeature	ENSMUSR00000050083	-	-	-	-	-	-	-	-	-	-	-	-	-	-	-	-	-	-	-	-	-	-	-	-	-	-	-	-	-	-	-	-	-
TpB_UVA_UV564_VEP_ALL.xlsx	TpB	UVA	UV564	11:102896958-102896958	T	missense_variant	MODERATE	Gfap	ENSMUSG00000020932	Transcript	ENSMUST00000067444.9	protein_coding	01 of 09	-	ENSMUST00000067444.9:c.160G>A	ENSMUSP00000064691.3:p.Ala54Thr	174	160	54	A/T	Gcg/Acg	-	-	-1	-	MGI	-	-	1	P1	CCDS25507.1	ENSMUSP00000064691	P03995	-	UPI0000192B9B	deleterious(0.01)	-	-	-	-	-	-	-	-
TpB_UVA_UV564_VEP_ALL.xlsx	TpB	UVA	UV564	11:102896958-102896958	T	missense_variant	MODERATE	Gfap	ENSMUSG00000020932	Transcript	ENSMUST00000077902.4	protein_coding	01 of 08	-	ENSMUST00000077902.4:c.160G>A	ENSMUSP00000077061.4:p.Ala54Thr	243	160	54	A/T	Gcg/Acg	-	-	-1	-	MGI	-	-	1	-	CCDS48950.1	ENSMUSP00000077061	P03995	-	UPI0000D8B66C	deleterious(0.01)	-	-	-	-	-	-	-	-
TpB_UVA_UV564_VEP_ALL.xlsx	TpB	UVA	UV564	11:102896958-102896958	T	intron_variant,non_coding_transcript_variant	MODIFIER	Gfap	ENSMUSG00000020932	Transcript	ENSMUST00000127909.1	processed_transcript	-	01 of 03	ENSMUST00000127909.1:n.147-1148G>A	-	-	-	-	-	-	-	-	-1	-	MGI	-	-	3	-	-	-	-	-	-	-	-	-	-	-	-	-	-	-
TpB_UVA_UV564_VEP_ALL.xlsx	TpB	UVA	UV564	11:102896958-102896958	T	regulatory_region_variant	MODIFIER	-	-	RegulatoryFeature	ENSMUSR00000051196	-	-	-	-	-	-	-	-	-	-	-	-	-	-	-	-	-	-	-	-	-	-	-	-	-	-	-	-	-	-	-	-	-
TpB_UVA_UV564_VEP_ALL.xlsx	TpB	UVA	UV564	12:4775325-4775325	T	intron_variant	MODIFIER	Pfn4	ENSMUSG00000020639	Transcript	ENSMUST00000020967.10	protein_coding	-	02 of 03	ENSMUST00000020967.10:c.256-95G>T	-	-	-	-	-	-	-	-	1	-	MGI	-	-	1	P1	CCDS25790.1	ENSMUSP00000020967	Q9D6I3	Q6JEK6	UPI00000219A9	-	-	-	-	-	-	-	-	-
TpB_UVA_UV564_VEP_ALL.xlsx	TpB	UVA	UV564	12:4775325-4775325	T	intron_variant	MODIFIER	Pfn4	ENSMUSG00000020639	Transcript	ENSMUST00000178879.2	protein_coding	-	03 of 04	ENSMUST00000178879.2:c.256-95G>T	-	-	-	-	-	-	-	-	1	-	MGI	-	-	1	P1	CCDS25790.1	ENSMUSP00000136765	Q9D6I3	Q6JEK6	UPI00000219A9	-	-	-	-	-	-	-	-	-
TpB_UVA_UV564_VEP_ALL.xlsx	TpB	UVA	UV564	12:4775325-4775325	T	downstream_gene_variant	MODIFIER	Pfn4	ENSMUSG00000020639	Transcript	ENSMUST00000219438.1	protein_coding	-	-	-	-	-	-	-	-	-	-	821	1	cds_end_NF	MGI	-	-	3	-	-	ENSMUSP00000151865	-	A0A1W2P802	UPI00097CE21F	-	-	-	-	-	-	-	-	-
TpB_UVA_UV564_VEP_ALL.xlsx	TpB	UVA	UV564	12:4775325-4775325	T	intron_variant	MODIFIER	Pfn4	ENSMUSG00000020639	Transcript	ENSMUST00000219503.1	protein_coding	-	02 of 02	ENSMUST00000219503.1:c.256-95G>T	-	-	-	-	-	-	-	-	1	-	MGI	-	-	1	-	-	ENSMUSP00000151411	-	A0A1W2P6U9	UPI000058A3EB	-	-	-	-	-	-	-	-	-
TpB_UVA_UV564_VEP_ALL.xlsx	TpB	UVA	UV564	12:4775325-4775325	T	regulatory_region_variant	MODIFIER	-	-	RegulatoryFeature	ENSMUSR00000529076	-	-	-	-	-	-	-	-	-	-	-	-	-	-	-	-	-	-	-	-	-	-	-	-	-	-	-	-	-	-	-	-	-
TpB_UVA_UV564_VEP_ALL.xlsx	TpB	UVA	UV564	12:4775328-4775328	T	intron_variant	MODIFIER	Pfn4	ENSMUSG00000020639	Transcript	ENSMUST00000020967.10	protein_coding	-	02 of 03	ENSMUST00000020967.10:c.256-92G>T	-	-	-	-	-	-	-	-	1	-	MGI	-	-	1	P1	CCDS25790.1	ENSMUSP00000020967	Q9D6I3	Q6JEK6	UPI00000219A9	-	-	-	-	-	-	-	-	-
TpB_UVA_UV564_VEP_ALL.xlsx	TpB	UVA	UV564	12:4775328-4775328	T	intron_variant	MODIFIER	Pfn4	ENSMUSG00000020639	Transcript	ENSMUST00000178879.2	protein_coding	-	03 of 04	ENSMUST00000178879.2:c.256-92G>T	-	-	-	-	-	-	-	-	1	-	MGI	-	-	1	P1	CCDS25790.1	ENSMUSP00000136765	Q9D6I3	Q6JEK6	UPI00000219A9	-	-	-	-	-	-	-	-	-
TpB_UVA_UV564_VEP_ALL.xlsx	TpB	UVA	UV564	12:4775328-4775328	T	downstream_gene_variant	MODIFIER	Pfn4	ENSMUSG00000020639	Transcript	ENSMUST00000219438.1	protein_coding	-	-	-	-	-	-	-	-	-	-	824	1	cds_end_NF	MGI	-	-	3	-	-	ENSMUSP00000151865	-	A0A1W2P802	UPI00097CE21F	-	-	-	-	-	-	-	-	-
TpB_UVA_UV564_VEP_ALL.xlsx	TpB	UVA	UV564	12:4775328-4775328	T	intron_variant	MODIFIER	Pfn4	ENSMUSG00000020639	Transcript	ENSMUST00000219503.1	protein_coding	-	02 of 02	ENSMUST00000219503.1:c.256-92G>T	-	-	-	-	-	-	-	-	1	-	MGI	-	-	1	-	-	ENSMUSP00000151411	-	A0A1W2P6U9	UPI000058A3EB	-	-	-	-	-	-	-	-	-
TpB_UVA_UV564_VEP_ALL.xlsx	TpB	UVA	UV564	12:4775328-4775328	T	regulatory_region_variant	MODIFIER	-	-	RegulatoryFeature	ENSMUSR00000529076	-	-	-	-	-	-	-	-	-	-	-	-	-	-	-	-	-	-	-	-	-	-	-	-	-	-	-	-	-	-	-	-	-
TpB_UVA_UV564_VEP_ALL.xlsx	TpB	UVA	UV564	13:61524459-61524459	A	intergenic_variant	MODIFIER	-	-	-	-	-	-	-	-	-	-	-	-	-	-	-	-	-	-	-	-	-	-	-	-	-	-	-	-	-	-	-	-	-	-	-	-	-
TpB_UVA_UV564_VEP_ALL.xlsx	TpB	UVA	UV564	13:61567948-61567948	G	intron_variant	MODIFIER	Cts3	ENSMUSG00000074870	Transcript	ENSMUST00000054702.8	protein_coding	-	04 of 07	ENSMUST00000054702.8:c.396+107T>C	-	-	-	-	-	-	-	-	-1	-	MGI	-	-	1	P1	CCDS36695.1	ENSMUSP00000058359	-	Q91ZD5	UPI0000021BF4	-	-	-	-	-	-	-	-	-
TpB_UVA_UV564_VEP_ALL.xlsx	TpB	UVA	UV564	13:61567948-61567948	G	intron_variant	MODIFIER	Cts3	ENSMUSG00000074870	Transcript	ENSMUST00000223815.1	protein_coding	-	04 of 07	ENSMUST00000223815.1:c.396+107T>C	-	-	-	-	-	-	-	-	-1	-	MGI	-	-	-	P1	CCDS36695.1	ENSMUSP00000153399	-	Q91ZD5	UPI0000021BF4	-	-	-	-	-	-	-	-	-
TpB_UVA_UV564_VEP_ALL.xlsx	TpB	UVA	UV564	13:61567948-61567948	G	non_coding_transcript_exon_variant	MODIFIER	Cts3	ENSMUSG00000074870	Transcript	ENSMUST00000224050.1	retained_intron	03 of 03	-	ENSMUST00000224050.1:n.659T>C	-	659	-	-	-	-	-	-	-1	-	MGI	-	-	-	-	-	-	-	-	-	-	-	-	-	-	-	-	-	-
TpB_UVA_UV564_VEP_ALL.xlsx	TpB	UVA	UV564	13:61567948-61567948	G	intron_variant,NMD_transcript_variant	MODIFIER	Cts3	ENSMUSG00000074870	Transcript	ENSMUST00000224855.1	nonsense_mediated_decay	-	04 of 06	ENSMUST00000224855.1:c.396+107T>C	-	-	-	-	-	-	-	-	-1	-	MGI	-	-	-	-	-	ENSMUSP00000153683	-	A0A286YE21	UPI000BAD5AD6	-	-	-	-	-	-	-	-	-
TpB_UVA_UV564_VEP_ALL.xlsx	TpB	UVA	UV564	13:61567948-61567948	G	non_coding_transcript_exon_variant	MODIFIER	Cts3	ENSMUSG00000074870	Transcript	ENSMUST00000224967.1	retained_intron	04 of 04	-	ENSMUST00000224967.1:n.659T>C	-	659	-	-	-	-	-	-	-1	-	MGI	-	-	-	-	-	-	-	-	-	-	-	-	-	-	-	-	-	-
TpB_UVA_UV564_VEP_ALL.xlsx	TpB	UVA	UV564	13:61567948-61567948	G	upstream_gene_variant	MODIFIER	Cts3	ENSMUSG00000074870	Transcript	ENSMUST00000225515.1	retained_intron	-	-	-	-	-	-	-	-	-	-	1260	-1	-	MGI	-	-	-	-	-	-	-	-	-	-	-	-	-	-	-	-	-	-
TpB_UVA_UV564_VEP_ALL.xlsx	TpB	UVA	UV564	13:61567948-61567948	G	intron_variant	MODIFIER	Gm49352	ENSMUSG00000114904	Transcript	ENSMUST00000225902.1	protein_coding	-	01 of 02	ENSMUST00000225902.1:c.-55+107T>C	-	-	-	-	-	-	-	-	-1	cds_end_NF	MGI	-	-	-	P1	-	ENSMUSP00000152924	-	A0A286YCD0	UPI000BAD5BA7	-	-	-	-	-	-	-	-	-
TpB_UVA_UV564_VEP_ALL.xlsx	TpB	UVA	UV564	13:61567978-61567978	G	intron_variant	MODIFIER	Cts3	ENSMUSG00000074870	Transcript	ENSMUST00000054702.8	protein_coding	-	04 of 07	ENSMUST00000054702.8:c.396+77T>C	-	-	-	-	-	-	-	-	-1	-	MGI	-	-	1	P1	CCDS36695.1	ENSMUSP00000058359	-	Q91ZD5	UPI0000021BF4	-	-	-	-	-	-	-	-	-
TpB_UVA_UV564_VEP_ALL.xlsx	TpB	UVA	UV564	13:61567978-61567978	G	intron_variant	MODIFIER	Cts3	ENSMUSG00000074870	Transcript	ENSMUST00000223815.1	protein_coding	-	04 of 07	ENSMUST00000223815.1:c.396+77T>C	-	-	-	-	-	-	-	-	-1	-	MGI	-	-	-	P1	CCDS36695.1	ENSMUSP00000153399	-	Q91ZD5	UPI0000021BF4	-	-	-	-	-	-	-	-	-
TpB_UVA_UV564_VEP_ALL.xlsx	TpB	UVA	UV564	13:61567978-61567978	G	non_coding_transcript_exon_variant	MODIFIER	Cts3	ENSMUSG00000074870	Transcript	ENSMUST00000224050.1	retained_intron	03 of 03	-	ENSMUST00000224050.1:n.629T>C	-	629	-	-	-	-	-	-	-1	-	MGI	-	-	-	-	-	-	-	-	-	-	-	-	-	-	-	-	-	-
TpB_UVA_UV564_VEP_ALL.xlsx	TpB	UVA	UV564	13:61567978-61567978	G	intron_variant,NMD_transcript_variant	MODIFIER	Cts3	ENSMUSG00000074870	Transcript	ENSMUST00000224855.1	nonsense_mediated_decay	-	04 of 06	ENSMUST00000224855.1:c.396+77T>C	-	-	-	-	-	-	-	-	-1	-	MGI	-	-	-	-	-	ENSMUSP00000153683	-	A0A286YE21	UPI000BAD5AD6	-	-	-	-	-	-	-	-	-
TpB_UVA_UV564_VEP_ALL.xlsx	TpB	UVA	UV564	13:61567978-61567978	G	non_coding_transcript_exon_variant	MODIFIER	Cts3	ENSMUSG00000074870	Transcript	ENSMUST00000224967.1	retained_intron	04 of 04	-	ENSMUST00000224967.1:n.629T>C	-	629	-	-	-	-	-	-	-1	-	MGI	-	-	-	-	-	-	-	-	-	-	-	-	-	-	-	-	-	-
TpB_UVA_UV564_VEP_ALL.xlsx	TpB	UVA	UV564	13:61567978-61567978	G	upstream_gene_variant	MODIFIER	Cts3	ENSMUSG00000074870	Transcript	ENSMUST00000225515.1	retained_intron	-	-	-	-	-	-	-	-	-	-	1290	-1	-	MGI	-	-	-	-	-	-	-	-	-	-	-	-	-	-	-	-	-	-
TpB_UVA_UV564_VEP_ALL.xlsx	TpB	UVA	UV564	13:61567978-61567978	G	intron_variant	MODIFIER	Gm49352	ENSMUSG00000114904	Transcript	ENSMUST00000225902.1	protein_coding	-	01 of 02	ENSMUST00000225902.1:c.-55+77T>C	-	-	-	-	-	-	-	-	-1	cds_end_NF	MGI	-	-	-	P1	-	ENSMUSP00000152924	-	A0A286YCD0	UPI000BAD5BA7	-	-	-	-	-	-	-	-	-
TpB_UVA_UV564_VEP_ALL.xlsx	TpB	UVA	UV564	13:61780841-61780841	G	intergenic_variant	MODIFIER	-	-	-	-	-	-	-	-	-	-	-	-	-	-	-	-	-	-	-	-	-	-	-	-	-	-	-	-	-	-	-	-	-	-	-	-	-
TpB_UVA_UV564_VEP_ALL.xlsx	TpB	UVA	UV564	13:61780854-61780854	T	intergenic_variant	MODIFIER	-	-	-	-	-	-	-	-	-	-	-	-	-	-	-	-	-	-	-	-	-	-	-	-	-	-	-	-	-	-	-	-	-	-	-	-	-
TpB_UVA_UV564_VEP_ALL.xlsx	TpB	UVA	UV564	13:61785872-61785872	A	intergenic_variant	MODIFIER	-	-	-	-	-	-	-	-	-	-	-	-	-	-	-	-	-	-	-	-	-	-	-	-	-	-	-	-	-	-	-	-	-	-	-	-	-
TpB_UVA_UV564_VEP_ALL.xlsx	TpB	UVA	UV564	13:62047138-62047138	G	intron_variant,non_coding_transcript_variant	MODIFIER	Gm3325	ENSMUSG00000113836	Transcript	ENSMUST00000220871.1	processed_transcript	-	01 of 03	ENSMUST00000220871.1:n.449-43T>G	-	-	-	-	-	-	-	-	1	-	MGI	-	-	2	-	-	-	-	-	-	-	-	-	-	-	-	-	-	-
TpB_UVA_UV564_VEP_ALL.xlsx	TpB	UVA	UV564	13:62047138-62047138	G	intron_variant,non_coding_transcript_variant	MODIFIER	Gm48228	ENSMUSG00000114036	Transcript	ENSMUST00000220886.1	lincRNA	-	01 of 01	ENSMUST00000220886.1:n.142-40236A>C	-	-	-	-	-	-	-	-	-1	-	MGI	-	-	5	-	-	-	-	-	-	-	-	-	-	-	-	-	-	-
TpB_UVA_UV564_VEP_ALL.xlsx	TpB	UVA	UV564	13:62047138-62047138	G	upstream_gene_variant	MODIFIER	Gm3325	ENSMUSG00000113836	Transcript	ENSMUST00000221814.1	transcribed_processed_pseudogene	-	-	-	-	-	-	-	-	-	-	1710	1	-	MGI	-	-	-	-	-	-	-	-	-	-	-	-	-	-	-	-	-	-
TpB_UVA_UV564_VEP_ALL.xlsx	TpB	UVA	UV564	13:62047138-62047138	G	intron_variant,non_coding_transcript_variant	MODIFIER	Gm3325	ENSMUSG00000113836	Transcript	ENSMUST00000223499.1	processed_transcript	-	01 of 02	ENSMUST00000223499.1:n.70-43T>G	-	-	-	-	-	-	-	-	1	-	MGI	-	-	2	-	-	-	-	-	-	-	-	-	-	-	-	-	-	-
TpB_UVA_UV564_VEP_ALL.xlsx	TpB	UVA	UV564	13:62558308-62558308	A	intron_variant	MODIFIER	Zfp935	ENSMUSG00000055228	Transcript	ENSMUST00000076195.6	protein_coding	-	01 of 02	ENSMUST00000076195.6:c.3+179G>T	-	-	-	-	-	-	-	-	-1	-	MGI	-	-	1	P1	-	ENSMUSP00000075552	-	A0A1Y7VP04	UPI0001837E9A	-	-	-	-	-	-	-	-	-
TpB_UVA_UV564_VEP_ALL.xlsx	TpB	UVA	UV564	13:62558308-62558308	A	intron_variant	MODIFIER	Zfp934	ENSMUSG00000074865	Transcript	ENSMUST00000101547.11	protein_coding	-	01 of 03	ENSMUST00000101547.11:c.3+179G>T	-	-	-	-	-	-	-	-	-1	-	MGI	-	-	5	P1	-	ENSMUSP00000099083	-	K7N6H3	UPI00003545FD	-	-	-	-	-	-	-	-	-
TpB_UVA_UV564_VEP_ALL.xlsx	TpB	UVA	UV564	13:62558308-62558308	A	intron_variant	MODIFIER	Zfp934	ENSMUSG00000074865	Transcript	ENSMUST00000220648.1	protein_coding	-	01 of 04	ENSMUST00000220648.1:c.-298+179G>T	-	-	-	-	-	-	-	-	-1	-	MGI	-	-	5	-	-	ENSMUSP00000152492	-	A0A1Y7VJM8	UPI000B3D7D46	-	-	-	-	-	-	-	-	-
TpB_UVA_UV564_VEP_ALL.xlsx	TpB	UVA	UV564	13:62558308-62558308	A	intron_variant,NMD_transcript_variant	MODIFIER	Zfp934	ENSMUSG00000074865	Transcript	ENSMUST00000221250.1	nonsense_mediated_decay	-	01 of 05	ENSMUST00000221250.1:c.3+179G>T	-	-	-	-	-	-	-	-	-1	-	MGI	-	-	5	-	-	ENSMUSP00000152631	-	A0A1Y7VMB8	UPI000B3D7DA0	-	-	-	-	-	-	-	-	-
TpB_UVA_UV564_VEP_ALL.xlsx	TpB	UVA	UV564	13:62558308-62558308	A	intron_variant,non_coding_transcript_variant	MODIFIER	Zfp934	ENSMUSG00000074865	Transcript	ENSMUST00000221279.1	processed_transcript	-	01 of 01	ENSMUST00000221279.1:n.140-5326G>T	-	-	-	-	-	-	-	-	-1	-	MGI	-	-	2	-	-	-	-	-	-	-	-	-	-	-	-	-	-	-
TpB_UVA_UV564_VEP_ALL.xlsx	TpB	UVA	UV564	13:62558308-62558308	A	intron_variant,non_coding_transcript_variant	MODIFIER	Zfp934	ENSMUSG00000074865	Transcript	ENSMUST00000221303.1	processed_transcript	-	01 of 02	ENSMUST00000221303.1:n.143+179G>T	-	-	-	-	-	-	-	-	-1	-	MGI	-	-	5	-	-	-	-	-	-	-	-	-	-	-	-	-	-	-
TpB_UVA_UV564_VEP_ALL.xlsx	TpB	UVA	UV564	13:62558308-62558308	A	intron_variant,non_coding_transcript_variant	MODIFIER	Zfp934	ENSMUSG00000074865	Transcript	ENSMUST00000221494.1	processed_transcript	-	01 of 04	ENSMUST00000221494.1:n.126+179G>T	-	-	-	-	-	-	-	-	-1	-	MGI	-	-	5	-	-	-	-	-	-	-	-	-	-	-	-	-	-	-
TpB_UVA_UV564_VEP_ALL.xlsx	TpB	UVA	UV564	13:62558308-62558308	A	intron_variant	MODIFIER	Zfp934	ENSMUSG00000074865	Transcript	ENSMUST00000222429.1	protein_coding	-	01 of 03	ENSMUST00000222429.1:c.3+179G>T	-	-	-	-	-	-	-	-	-1	-	MGI	-	-	3	-	-	ENSMUSP00000152461	-	A0A1Y7VM11	UPI000B3D7CAC	-	-	-	-	-	-	-	-	-
TpB_UVA_UV564_VEP_ALL.xlsx	TpB	UVA	UV564	13:62558308-62558308	A	intron_variant	MODIFIER	Zfp934	ENSMUSG00000074865	Transcript	ENSMUST00000222746.1	protein_coding	-	01 of 02	ENSMUST00000222746.1:c.3+179G>T	-	-	-	-	-	-	-	-	-1	-	MGI	-	-	1	-	-	ENSMUSP00000152804	-	A0A1Y7VKB4	UPI0005ABB196	-	-	-	-	-	-	-	-	-
TpB_UVA_UV564_VEP_ALL.xlsx	TpB	UVA	UV564	13:62558308-62558308	A	intron_variant	MODIFIER	Zfp934	ENSMUSG00000074865	Transcript	ENSMUST00000222852.1	protein_coding	-	01 of 04	ENSMUST00000222852.1:c.-194+179G>T	-	-	-	-	-	-	-	-	-1	cds_end_NF	MGI	-	-	3	-	-	ENSMUSP00000152181	-	A0A1Y7VN06	UPI000B3D7D9A	-	-	-	-	-	-	-	-	-
TpB_UVA_UV564_VEP_ALL.xlsx	TpB	UVA	UV564	13:62558308-62558308	A	regulatory_region_variant	MODIFIER	-	-	RegulatoryFeature	ENSMUSR00000549167	-	-	-	-	-	-	-	-	-	-	-	-	-	-	-	-	-	-	-	-	-	-	-	-	-	-	-	-	-	-	-	-	-
TpB_UVA_UV564_VEP_ALL.xlsx	TpB	UVA	UV564	13:65310467-65310467	A	upstream_gene_variant	MODIFIER	Gm3800	ENSMUSG00000114194	Transcript	ENSMUST00000221086.1	processed_pseudogene	-	-	-	-	-	-	-	-	-	-	3291	1	-	MGI	-	-	-	-	-	-	-	-	-	-	-	-	-	-	-	-	-	-
TpB_UVA_UV564_VEP_ALL.xlsx	TpB	UVA	UV564	13:65310467-65310467	A	regulatory_region_variant	MODIFIER	-	-	RegulatoryFeature	ENSMUSR00000549543	-	-	-	-	-	-	-	-	-	-	-	-	-	-	-	-	-	-	-	-	-	-	-	-	-	-	-	-	-	-	-	-	-
TpB_UVA_UV564_VEP_ALL.xlsx	TpB	UVA	UV564	13:65310469-65310469	T	upstream_gene_variant	MODIFIER	Gm3800	ENSMUSG00000114194	Transcript	ENSMUST00000221086.1	processed_pseudogene	-	-	-	-	-	-	-	-	-	-	3289	1	-	MGI	-	-	-	-	-	-	-	-	-	-	-	-	-	-	-	-	-	-
TpB_UVA_UV564_VEP_ALL.xlsx	TpB	UVA	UV564	13:65310469-65310469	T	regulatory_region_variant	MODIFIER	-	-	RegulatoryFeature	ENSMUSR00000549543	-	-	-	-	-	-	-	-	-	-	-	-	-	-	-	-	-	-	-	-	-	-	-	-	-	-	-	-	-	-	-	-	-
TpB_UVA_UV564_VEP_ALL.xlsx	TpB	UVA	UV564	13:65340736-65340736	G	intron_variant,non_coding_transcript_variant	MODIFIER	Gm7762	ENSMUSG00000113406	Transcript	ENSMUST00000220595.1	lincRNA	-	02 of 03	ENSMUST00000220595.1:n.242-127T>C	-	-	-	-	-	-	-	-	-1	-	MGI	-	-	3	-	-	-	-	-	-	-	-	-	-	-	-	-	-	-
TpB_UVA_UV564_VEP_ALL.xlsx	TpB	UVA	UV564	13:65340736-65340736	G	upstream_gene_variant	MODIFIER	Gm47264	ENSMUSG00000114142	Transcript	ENSMUST00000222824.1	processed_pseudogene	-	-	-	-	-	-	-	-	-	-	4391	1	-	MGI	-	-	-	-	-	-	-	-	-	-	-	-	-	-	-	-	-	-
TpB_UVA_UV564_VEP_ALL.xlsx	TpB	UVA	UV564	13:65431209-65431209	G	intron_variant,non_coding_transcript_variant	MODIFIER	Vmn2r-ps96	ENSMUSG00000114065	Transcript	ENSMUST00000221218.1	unprocessed_pseudogene	-	03 of 05	ENSMUST00000221218.1:n.1273+105T>C	-	-	-	-	-	-	-	-	-1	-	MGI	-	-	-	-	-	-	-	-	-	-	-	-	-	-	-	-	-	-
TpB_UVA_UV564_VEP_ALL.xlsx	TpB	UVA	UV564	13:65510902-65510902	C	upstream_gene_variant	MODIFIER	Gm10139	ENSMUSG00000063905	Transcript	ENSMUST00000081471.2	protein_coding	-	-	-	-	-	-	-	-	-	-	1776	1	-	MGI	-	-	-	P1	-	ENSMUSP00000080191	-	O88245	UPI00000294B2	-	-	-	-	-	-	-	-	-
TpB_UVA_UV564_VEP_ALL.xlsx	TpB	UVA	UV564	13:65510902-65510902	C	upstream_gene_variant	MODIFIER	Gm48171	ENSMUSG00000113008	Transcript	ENSMUST00000220634.1	processed_pseudogene	-	-	-	-	-	-	-	-	-	-	3285	1	-	MGI	-	-	-	-	-	-	-	-	-	-	-	-	-	-	-	-	-	-
TpB_UVA_UV564_VEP_ALL.xlsx	TpB	UVA	UV564	13:65510902-65510902	C	intron_variant,non_coding_transcript_variant	MODIFIER	Gm48166	ENSMUSG00000113618	Transcript	ENSMUST00000222230.1	lincRNA	-	01 of 01	ENSMUST00000222230.1:n.997+16416T>C	-	-	-	-	-	-	-	-	1	-	MGI	-	-	5	-	-	-	-	-	-	-	-	-	-	-	-	-	-	-
TpB_UVA_UV564_VEP_ALL.xlsx	TpB	UVA	UV564	13:65510902-65510902	C	intron_variant,non_coding_transcript_variant	MODIFIER	Gm48165	ENSMUSG00000113468	Transcript	ENSMUST00000223034.1	processed_transcript	-	01 of 01	ENSMUST00000223034.1:n.689+22775T>C	-	-	-	-	-	-	-	-	1	-	MGI	-	-	5	-	-	-	-	-	-	-	-	-	-	-	-	-	-	-
TpB_UVA_UV564_VEP_ALL.xlsx	TpB	UVA	UV564	13:65564186-65564186	T	downstream_gene_variant	MODIFIER	Cbx3-ps2	ENSMUSG00000113565	Transcript	ENSMUST00000099421.3	processed_pseudogene	-	-	-	-	-	-	-	-	-	-	4475	1	-	MGI	-	-	-	-	-	-	-	-	-	-	-	-	-	-	-	-	-	-
TpB_UVA_UV564_VEP_ALL.xlsx	TpB	UVA	UV564	13:65564186-65564186	T	intron_variant,non_coding_transcript_variant	MODIFIER	Gm48166	ENSMUSG00000113618	Transcript	ENSMUST00000222230.1	lincRNA	-	01 of 01	ENSMUST00000222230.1:n.998-65926C>T	-	-	-	-	-	-	-	-	1	-	MGI	-	-	5	-	-	-	-	-	-	-	-	-	-	-	-	-	-	-
TpB_UVA_UV564_VEP_ALL.xlsx	TpB	UVA	UV564	13:65564186-65564186	T	downstream_gene_variant	MODIFIER	Vmn2r-ps97	ENSMUSG00000113381	Transcript	ENSMUST00000222427.2	unprocessed_pseudogene	-	-	-	-	-	-	-	-	-	-	20	-1	-	MGI	-	-	-	-	-	-	-	-	-	-	-	-	-	-	-	-	-	-
TpB_UVA_UV564_VEP_ALL.xlsx	TpB	UVA	UV564	13:65564186-65564186	T	intron_variant,non_coding_transcript_variant	MODIFIER	Gm48165	ENSMUSG00000113468	Transcript	ENSMUST00000223034.1	processed_transcript	-	01 of 01	ENSMUST00000223034.1:n.690-59542C>T	-	-	-	-	-	-	-	-	1	-	MGI	-	-	5	-	-	-	-	-	-	-	-	-	-	-	-	-	-	-
TpB_UVA_UV564_VEP_ALL.xlsx	TpB	UVA	UV564	13:65564194-65564194	T	downstream_gene_variant	MODIFIER	Cbx3-ps2	ENSMUSG00000113565	Transcript	ENSMUST00000099421.3	processed_pseudogene	-	-	-	-	-	-	-	-	-	-	4483	1	-	MGI	-	-	-	-	-	-	-	-	-	-	-	-	-	-	-	-	-	-
TpB_UVA_UV564_VEP_ALL.xlsx	TpB	UVA	UV564	13:65564194-65564194	T	intron_variant,non_coding_transcript_variant	MODIFIER	Gm48166	ENSMUSG00000113618	Transcript	ENSMUST00000222230.1	lincRNA	-	01 of 01	ENSMUST00000222230.1:n.998-65918G>T	-	-	-	-	-	-	-	-	1	-	MGI	-	-	5	-	-	-	-	-	-	-	-	-	-	-	-	-	-	-
TpB_UVA_UV564_VEP_ALL.xlsx	TpB	UVA	UV564	13:65564194-65564194	T	downstream_gene_variant	MODIFIER	Vmn2r-ps97	ENSMUSG00000113381	Transcript	ENSMUST00000222427.2	unprocessed_pseudogene	-	-	-	-	-	-	-	-	-	-	12	-1	-	MGI	-	-	-	-	-	-	-	-	-	-	-	-	-	-	-	-	-	-
TpB_UVA_UV564_VEP_ALL.xlsx	TpB	UVA	UV564	13:65564194-65564194	T	intron_variant,non_coding_transcript_variant	MODIFIER	Gm48165	ENSMUSG00000113468	Transcript	ENSMUST00000223034.1	processed_transcript	-	01 of 01	ENSMUST00000223034.1:n.690-59534G>T	-	-	-	-	-	-	-	-	1	-	MGI	-	-	5	-	-	-	-	-	-	-	-	-	-	-	-	-	-	-
TpB_UVA_UV564_VEP_ALL.xlsx	TpB	UVA	UV564	13:65692537-65692537	A	intron_variant,non_coding_transcript_variant	MODIFIER	Gm19428	ENSMUSG00000113260	Transcript	ENSMUST00000220512.1	transcribed_processed_pseudogene	-	02 of 02	ENSMUST00000220512.1:n.179+77C>T	-	-	-	-	-	-	-	-	-1	-	MGI	-	-	-	-	-	-	-	-	-	-	-	-	-	-	-	-	-	-
TpB_UVA_UV564_VEP_ALL.xlsx	TpB	UVA	UV564	13:65692537-65692537	A	non_coding_transcript_exon_variant	MODIFIER	Gm19428	ENSMUSG00000113260	Transcript	ENSMUST00000220573.1	processed_transcript	06 of 06	-	ENSMUST00000220573.1:n.848C>T	-	848	-	-	-	-	-	-	-1	-	MGI	-	-	5	-	-	-	-	-	-	-	-	-	-	-	-	-	-	-
TpB_UVA_UV564_VEP_ALL.xlsx	TpB	UVA	UV564	13:65692537-65692537	A	upstream_gene_variant	MODIFIER	Gm19118	ENSMUSG00000113513	Transcript	ENSMUST00000222554.1	unprocessed_pseudogene	-	-	-	-	-	-	-	-	-	-	4526	1	-	MGI	-	-	-	-	-	-	-	-	-	-	-	-	-	-	-	-	-	-
TpB_UVA_UV564_VEP_ALL.xlsx	TpB	UVA	UV564	13:65904139-65904139	C	upstream_gene_variant	MODIFIER	Gm48218	ENSMUSG00000114625	Transcript	ENSMUST00000225676.1	processed_pseudogene	-	-	-	-	-	-	-	-	-	-	4084	1	-	MGI	-	-	-	-	-	-	-	-	-	-	-	-	-	-	-	-	-	-
TpB_UVA_UV564_VEP_ALL.xlsx	TpB	UVA	UV564	13:65904152-65904152	C	upstream_gene_variant	MODIFIER	Gm48218	ENSMUSG00000114625	Transcript	ENSMUST00000225676.1	processed_pseudogene	-	-	-	-	-	-	-	-	-	-	4071	1	-	MGI	-	-	-	-	-	-	-	-	-	-	-	-	-	-	-	-	-	-
TpB_UVA_UV564_VEP_ALL.xlsx	TpB	UVA	UV564	13:65990990-65990990	A	downstream_gene_variant	MODIFIER	Gm48221	ENSMUSG00000113173	Transcript	ENSMUST00000221832.1	lincRNA	-	-	-	-	-	-	-	-	-	-	3059	-1	-	MGI	-	-	5	-	-	-	-	-	-	-	-	-	-	-	-	-	-	-
TpB_UVA_UV564_VEP_ALL.xlsx	TpB	UVA	UV564	13:65990990-65990990	A	upstream_gene_variant	MODIFIER	Gm48220	ENSMUSG00000113653	Transcript	ENSMUST00000223087.1	processed_pseudogene	-	-	-	-	-	-	-	-	-	-	3048	1	-	MGI	-	-	-	-	-	-	-	-	-	-	-	-	-	-	-	-	-	-
TpB_UVA_UV564_VEP_ALL.xlsx	TpB	UVA	UV564	13:66062677-66062677	A	intergenic_variant	MODIFIER	-	-	-	-	-	-	-	-	-	-	-	-	-	-	-	-	-	-	-	-	-	-	-	-	-	-	-	-	-	-	-	-	-	-	-	-	-
TpB_UVA_UV564_VEP_ALL.xlsx	TpB	UVA	UV564	13:66062679-66062679	A	intergenic_variant	MODIFIER	-	-	-	-	-	-	-	-	-	-	-	-	-	-	-	-	-	-	-	-	-	-	-	-	-	-	-	-	-	-	-	-	-	-	-	-	-
TpB_UVA_UV564_VEP_ALL.xlsx	TpB	UVA	UV564	13:66119588-66119588	A	intron_variant	MODIFIER	Gm10324	ENSMUSG00000095909	Transcript	ENSMUST00000092528.5	protein_coding	-	01 of 03	ENSMUST00000092528.5:c.3+39T>A	-	-	-	-	-	-	-	-	1	-	MGI	-	-	5	P1	-	ENSMUSP00000090190	-	L7N208	UPI0001D16928	-	-	-	-	-	-	-	-	-
TpB_UVA_UV564_VEP_ALL.xlsx	TpB	UVA	UV564	13:66119588-66119588	A	intron_variant	MODIFIER	Gm10324	ENSMUSG00000095909	Transcript	ENSMUST00000238355.1	protein_coding	-	01 of 02	ENSMUST00000238355.1:c.4-49T>A	-	-	-	-	-	-	-	-	1	-	MGI	-	-	-	-	-	ENSMUSP00000158641	-	A0A571BE92	UPI00114B4070	-	-	-	-	-	-	-	-	-
TpB_UVA_UV564_VEP_ALL.xlsx	TpB	UVA	UV564	13:66119588-66119588	A	intron_variant	MODIFIER	Gm10324	ENSMUSG00000095909	Transcript	ENSMUST00000238623.1	protein_coding	-	01 of 03	ENSMUST00000238623.1:c.4-49T>A	-	-	-	-	-	-	-	-	1	cds_end_NF	MGI	-	-	-	-	-	ENSMUSP00000158820	-	A0A571BGF1	UPI00114868E2	-	-	-	-	-	-	-	-	-
TpB_UVA_UV564_VEP_ALL.xlsx	TpB	UVA	UV564	13:66119588-66119588	A	intron_variant,non_coding_transcript_variant	MODIFIER	Gm50489	ENSMUSG00000118427	Transcript	ENSMUST00000238686.1	lincRNA	-	02 of 02	ENSMUST00000238686.1:n.207-105A>T	-	-	-	-	-	-	-	-	-1	-	MGI	-	-	-	-	-	-	-	-	-	-	-	-	-	-	-	-	-	-
TpB_UVA_UV564_VEP_ALL.xlsx	TpB	UVA	UV564	13:66122830-66122830	C	missense_variant	MODERATE	Gm10324	ENSMUSG00000095909	Transcript	ENSMUST00000092528.5	protein_coding	04 of 04	-	ENSMUST00000092528.5:c.1809A>C	ENSMUSP00000090190.5:p.Arg603Ser	1809	1809	603	R/S	agA/agC	-	-	1	-	MGI	-	-	5	P1	-	ENSMUSP00000090190	-	L7N208	UPI0001D16928	deleterious(0.02)	-	-	-	-	-	-	-	-
TpB_UVA_UV564_VEP_ALL.xlsx	TpB	UVA	UV564	13:66122830-66122830	C	downstream_gene_variant	MODIFIER	Gm10324	ENSMUSG00000095909	Transcript	ENSMUST00000238355.1	protein_coding	-	-	-	-	-	-	-	-	-	-	2626	1	-	MGI	-	-	-	-	-	ENSMUSP00000158641	-	A0A571BE92	UPI00114B4070	-	-	-	-	-	-	-	-	-
TpB_UVA_UV564_VEP_ALL.xlsx	TpB	UVA	UV564	13:66122830-66122830	C	downstream_gene_variant	MODIFIER	Gm10324	ENSMUSG00000095909	Transcript	ENSMUST00000238623.1	protein_coding	-	-	-	-	-	-	-	-	-	-	362	1	cds_end_NF	MGI	-	-	-	-	-	ENSMUSP00000158820	-	A0A571BGF1	UPI00114868E2	-	-	-	-	-	-	-	-	-
TpB_UVA_UV564_VEP_ALL.xlsx	TpB	UVA	UV564	13:66122830-66122830	C	intron_variant,non_coding_transcript_variant	MODIFIER	Gm50489	ENSMUSG00000118427	Transcript	ENSMUST00000238686.1	lincRNA	-	01 of 02	ENSMUST00000238686.1:n.113-1959T>G	-	-	-	-	-	-	-	-	-1	-	MGI	-	-	-	-	-	-	-	-	-	-	-	-	-	-	-	-	-	-
TpB_UVA_UV564_VEP_ALL.xlsx	TpB	UVA	UV564	13:66122840-66122840	G	downstream_gene_variant	MODIFIER	Gm10324	ENSMUSG00000095909	Transcript	ENSMUST00000092528.5	protein_coding	-	-	-	-	-	-	-	-	-	-	4	1	-	MGI	-	-	5	P1	-	ENSMUSP00000090190	-	L7N208	UPI0001D16928	-	-	-	-	-	-	-	-	-
TpB_UVA_UV564_VEP_ALL.xlsx	TpB	UVA	UV564	13:66122840-66122840	G	downstream_gene_variant	MODIFIER	Gm10324	ENSMUSG00000095909	Transcript	ENSMUST00000238355.1	protein_coding	-	-	-	-	-	-	-	-	-	-	2636	1	-	MGI	-	-	-	-	-	ENSMUSP00000158641	-	A0A571BE92	UPI00114B4070	-	-	-	-	-	-	-	-	-
TpB_UVA_UV564_VEP_ALL.xlsx	TpB	UVA	UV564	13:66122840-66122840	G	downstream_gene_variant	MODIFIER	Gm10324	ENSMUSG00000095909	Transcript	ENSMUST00000238623.1	protein_coding	-	-	-	-	-	-	-	-	-	-	372	1	cds_end_NF	MGI	-	-	-	-	-	ENSMUSP00000158820	-	A0A571BGF1	UPI00114868E2	-	-	-	-	-	-	-	-	-
TpB_UVA_UV564_VEP_ALL.xlsx	TpB	UVA	UV564	13:66122840-66122840	G	intron_variant,non_coding_transcript_variant	MODIFIER	Gm50489	ENSMUSG00000118427	Transcript	ENSMUST00000238686.1	lincRNA	-	01 of 02	ENSMUST00000238686.1:n.113-1969A>C	-	-	-	-	-	-	-	-	-1	-	MGI	-	-	-	-	-	-	-	-	-	-	-	-	-	-	-	-	-	-
TpB_UVA_UV564_VEP_ALL.xlsx	TpB	UVA	UV564	13:66351494-66351494	T	intron_variant,non_coding_transcript_variant	MODIFIER	Vmn2r-ps104	ENSMUSG00000094499	Transcript	ENSMUST00000099416.4	transcribed_unprocessed_pseudogene	-	04 of 04	ENSMUST00000099416.4:n.1426-95T>A	-	-	-	-	-	-	-	-	-1	-	MGI	-	-	5	-	-	-	-	-	-	-	-	-	-	-	-	-	-	-
TpB_UVA_UV564_VEP_ALL.xlsx	TpB	UVA	UV564	13:66351494-66351494	T	intron_variant,non_coding_transcript_variant	MODIFIER	Gm26754	ENSMUSG00000114616	Transcript	ENSMUST00000225647.1	lincRNA	-	02 of 02	ENSMUST00000225647.1:n.319+50948A>T	-	-	-	-	-	-	-	-	1	-	MGI	-	-	-	-	-	-	-	-	-	-	-	-	-	-	-	-	-	-
TpB_UVA_UV564_VEP_ALL.xlsx	TpB	UVA	UV564	13:66351494-66351494	T	non_coding_transcript_exon_variant	MODIFIER	Vmn2r-ps104	ENSMUSG00000094499	Transcript	ENSMUST00000234850.1	processed_transcript	10 of 10	-	ENSMUST00000234850.1:n.2454T>A	-	2454	-	-	-	-	-	-	-1	-	MGI	-	-	-	-	-	-	-	-	-	-	-	-	-	-	-	-	-	-
TpB_UVA_UV564_VEP_ALL.xlsx	TpB	UVA	UV564	13:66680544-66680544	G	intron_variant,non_coding_transcript_variant	MODIFIER	Zfp640	ENSMUSG00000074830	Transcript	ENSMUST00000071320.5	processed_transcript	-	01 of 03	ENSMUST00000071320.5:n.87-7214G>C	-	-	-	-	-	-	-	-	-1	-	MGI	-	-	5	-	-	-	-	-	-	-	-	-	-	-	-	-	-	-
TpB_UVA_UV564_VEP_ALL.xlsx	TpB	UVA	UV564	13:66680544-66680544	G	downstream_gene_variant	MODIFIER	Vmn2r-ps106	ENSMUSG00000114549	Transcript	ENSMUST00000224860.1	unprocessed_pseudogene	-	-	-	-	-	-	-	-	-	-	2295	-1	-	MGI	-	-	-	-	-	-	-	-	-	-	-	-	-	-	-	-	-	-
TpB_UVA_UV564_VEP_ALL.xlsx	TpB	UVA	UV564	13:66680544-66680544	G	upstream_gene_variant	MODIFIER	Gm40988	ENSMUSG00000114327	Transcript	ENSMUST00000225998.1	lincRNA	-	-	-	-	-	-	-	-	-	-	410	1	-	MGI	-	-	-	-	-	-	-	-	-	-	-	-	-	-	-	-	-	-
TpB_UVA_UV564_VEP_ALL.xlsx	TpB	UVA	UV564	13:66795008-66795008	C	upstream_gene_variant	MODIFIER	Gm48413	ENSMUSG00000114314	Transcript	ENSMUST00000224105.1	processed_pseudogene	-	-	-	-	-	-	-	-	-	-	4289	1	-	MGI	-	-	-	-	-	-	-	-	-	-	-	-	-	-	-	-	-	-
TpB_UVA_UV564_VEP_ALL.xlsx	TpB	UVA	UV564	13:66795008-66795008	C	non_coding_transcript_exon_variant	MODIFIER	Gm7896	ENSMUSG00000114353	Transcript	ENSMUST00000224253.1	transcribed_processed_pseudogene	01 of 03	-	ENSMUST00000224253.1:n.17T>G	-	17	-	-	-	-	-	-	-1	-	MGI	-	-	-	-	-	-	-	-	-	-	-	-	-	-	-	-	-	-
TpB_UVA_UV564_VEP_ALL.xlsx	TpB	UVA	UV564	13:66795008-66795008	C	non_coding_transcript_exon_variant	MODIFIER	Gm7896	ENSMUSG00000114353	Transcript	ENSMUST00000224917.1	processed_transcript	02 of 04	-	ENSMUST00000224917.1:n.114T>G	-	114	-	-	-	-	-	-	-1	-	MGI	-	-	-	-	-	-	-	-	-	-	-	-	-	-	-	-	-	-
TpB_UVA_UV564_VEP_ALL.xlsx	TpB	UVA	UV564	13:66802297-66802297	T	downstream_gene_variant	MODIFIER	Gm48413	ENSMUSG00000114314	Transcript	ENSMUST00000224105.1	processed_pseudogene	-	-	-	-	-	-	-	-	-	-	2907	1	-	MGI	-	-	-	-	-	-	-	-	-	-	-	-	-	-	-	-	-	-
TpB_UVA_UV564_VEP_ALL.xlsx	TpB	UVA	UV564	13:66802297-66802297	T	intron_variant,non_coding_transcript_variant	MODIFIER	Gm7896	ENSMUSG00000114353	Transcript	ENSMUST00000224917.1	processed_transcript	-	01 of 03	ENSMUST00000224917.1:n.96+168G>A	-	-	-	-	-	-	-	-	-1	-	MGI	-	-	-	-	-	-	-	-	-	-	-	-	-	-	-	-	-	-
TpB_UVA_UV564_VEP_ALL.xlsx	TpB	UVA	UV564	13:67181957-67181957	T	synonymous_variant	LOW	Rsl1	ENSMUSG00000058900	Transcript	ENSMUST00000021997.7	protein_coding	04 of 04	-	ENSMUST00000021997.7:c.468C>T	ENSMUSP00000021997.6:p.Phe156%3D	504	468	156	F	ttC/ttT	-	-	1	-	MGI	-	-	1	P1	CCDS26613.1	ENSMUSP00000021997	-	Q7M6Y1	UPI000021CAA2	-	-	-	-	-	-	-	-	-
TpB_UVA_UV564_VEP_ALL.xlsx	TpB	UVA	UV564	13:67181957-67181957	T	downstream_gene_variant	MODIFIER	Rsl1	ENSMUSG00000058900	Transcript	ENSMUST00000225334.1	nonsense_mediated_decay	-	-	-	-	-	-	-	-	-	-	145	1	-	MGI	-	-	-	-	-	ENSMUSP00000153578	-	A0A286YDU4	UPI000BAD5A12	-	-	-	-	-	-	-	-	-
TpB_UVA_UV564_VEP_ALL.xlsx	TpB	UVA	UV564	13:67751630-67751630	G	intron_variant,non_coding_transcript_variant	MODIFIER	Zfp85os	ENSMUSG00000044081	Transcript	ENSMUST00000049518.4	antisense	-	01 of 02	ENSMUST00000049518.4:n.124-1324T>G	-	-	-	-	-	-	-	-	1	-	MGI	-	-	1	-	-	-	-	-	-	-	-	-	-	-	-	-	-	-
TpB_UVA_UV564_VEP_ALL.xlsx	TpB	UVA	UV564	13:67751630-67751630	G	3_prime_UTR_variant,NMD_transcript_variant	MODIFIER	Zfp85	ENSMUSG00000058331	Transcript	ENSMUST00000091520.13	nonsense_mediated_decay	03 of 04	-	ENSMUST00000091520.13:c.*109A>C	-	334	-	-	-	-	-	-	-1	-	MGI	-	-	2	-	-	ENSMUSP00000089105	-	F7A6M1	UPI000B3D7D9B	-	-	-	-	-	-	-	-	-
TpB_UVA_UV564_VEP_ALL.xlsx	TpB	UVA	UV564	13:67751630-67751630	G	intron_variant,non_coding_transcript_variant	MODIFIER	Zfp85os	ENSMUSG00000044081	Transcript	ENSMUST00000143812.1	antisense	-	01 of 02	ENSMUST00000143812.1:n.442-1358T>G	-	-	-	-	-	-	-	-	1	-	MGI	-	-	1	-	-	-	-	-	-	-	-	-	-	-	-	-	-	-
TpB_UVA_UV564_VEP_ALL.xlsx	TpB	UVA	UV564	13:67751630-67751630	G	missense_variant	MODERATE	Zfp85	ENSMUSG00000058331	Transcript	ENSMUST00000144183.2	protein_coding	03 of 04	-	ENSMUST00000144183.2:c.209A>C	ENSMUSP00000121202.2:p.Glu70Ala	369	209	70	E/A	gAa/gCa	-	-	-1	-	MGI	-	-	1	P1	CCDS36717.1	ENSMUSP00000121202	-	Q7TMC9	UPI00001B4B0D	tolerated(0.51)	-	-	-	-	-	-	-	-
TpB_UVA_UV564_VEP_ALL.xlsx	TpB	UVA	UV564	13:67751630-67751630	G	upstream_gene_variant	MODIFIER	Zfp85os	ENSMUSG00000044081	Transcript	ENSMUST00000181158.1	retained_intron	-	-	-	-	-	-	-	-	-	-	645	1	-	MGI	-	-	-	-	-	-	-	-	-	-	-	-	-	-	-	-	-	-
TpB_UVA_UV564_VEP_ALL.xlsx	TpB	UVA	UV564	13:68195800-68195800	A	intergenic_variant	MODIFIER	-	-	-	-	-	-	-	-	-	-	-	-	-	-	-	-	-	-	-	-	-	-	-	-	-	-	-	-	-	-	-	-	-	-	-	-	-
TpB_UVA_UV564_VEP_ALL.xlsx	TpB	UVA	UV564	14:29124728-29124728	G	intron_variant	MODIFIER	Cacna2d3	ENSMUSG00000021991	Transcript	ENSMUST00000022567.8	protein_coding	-	13 of 37	ENSMUST00000022567.8:c.1381-45A>C	-	-	-	-	-	-	-	-	-1	-	MGI	-	-	1	P1	-	ENSMUSP00000022567	Q9Z1L5	A0A411ACY3	UPI00000296DE	-	-	-	-	-	-	-	-	-
TpB_UVA_UV564_VEP_ALL.xlsx	TpB	UVA	UV564	14:29124728-29124728	G	intron_variant	MODIFIER	Cacna2d3	ENSMUSG00000021991	Transcript	ENSMUST00000225733.1	non_stop_decay	-	09 of 14	ENSMUST00000225733.1:c.583-45A>C	-	-	-	-	-	-	-	-	-1	-	MGI	-	-	-	-	-	ENSMUSP00000153143	-	A0A286YCT5	UPI000BAD5BCC	-	-	-	-	-	-	-	-	-
TpB_UVA_UV564_VEP_ALL.xlsx	TpB	UVA	UV564	14:29124728-29124728	G	intron_variant,NMD_transcript_variant	MODIFIER	Cacna2d3	ENSMUSG00000021991	Transcript	ENSMUST00000225863.1	nonsense_mediated_decay	-	10 of 15	ENSMUST00000225863.1:c.*350-45A>C	-	-	-	-	-	-	-	-	-1	-	MGI	-	-	-	-	-	ENSMUSP00000153444	-	A0A286YE06	UPI000BAD5BC3	-	-	-	-	-	-	-	-	-
TpB_UVA_UV564_VEP_ALL.xlsx	TpB	UVA	UV564	14:42312501-42312501	T	downstream_gene_variant	MODIFIER	Gm7995	ENSMUSG00000094157	Transcript	ENSMUST00000089789.10	protein_coding	-	-	-	-	-	-	-	-	-	-	228	1	-	MGI	-	-	5	P1	-	ENSMUSP00000087222	-	K7N665	UPI0002747174	-	-	-	-	-	-	-	-	-
TpB_UVA_UV564_VEP_ALL.xlsx	TpB	UVA	UV564	14:42312501-42312501	T	intron_variant	MODIFIER	Gm7995	ENSMUSG00000094157	Transcript	ENSMUST00000171967.1	protein_coding	-	03 of 03	ENSMUST00000171967.1:c.476+180A>T	-	-	-	-	-	-	-	-	1	cds_start_NF	MGI	-	-	5	-	-	ENSMUSP00000132956	-	L7N2E4	UPI0001F78C4E	-	-	-	-	-	-	-	-	-
TpB_UVA_UV564_VEP_ALL.xlsx	TpB	UVA	UV564	14:69770741-69770741	T	intron_variant	MODIFIER	Tnfrsf10b	ENSMUSG00000022074	Transcript	ENSMUST00000022663.6	protein_coding	-	01 of 07	ENSMUST00000022663.6:c.133-40C>T	-	-	-	-	-	-	-	-	1	-	MGI	-	-	1	P1	CCDS27243.1	ENSMUSP00000022663	Q9QZM4	-	UPI00000040BB	-	-	-	-	-	-	-	-	-
TpB_UVA_UV564_VEP_ALL.xlsx	TpB	UVA	UV564	14:69770741-69770741	T	intron_variant,non_coding_transcript_variant	MODIFIER	Tnfrsf10b	ENSMUSG00000022074	Transcript	ENSMUST00000224533.1	retained_intron	-	01 of 05	ENSMUST00000224533.1:n.308-40C>T	-	-	-	-	-	-	-	-	1	-	MGI	-	-	-	-	-	-	-	-	-	-	-	-	-	-	-	-	-	-
TpB_UVA_UV564_VEP_ALL.xlsx	TpB	UVA	UV564	15:75086687-75086687	A	regulatory_region_variant	MODIFIER	-	-	RegulatoryFeature	ENSMUSR00000101624	-	-	-	-	-	-	-	-	-	-	-	-	-	-	-	-	-	-	-	-	-	-	-	-	-	-	-	-	-	-	-	-	-
TpB_UVA_UV564_VEP_ALL.xlsx	TpB	UVA	UV564	15:75086687-75086687	A	intergenic_variant	MODIFIER	-	-	-	-	-	-	-	-	-	-	-	-	-	-	-	-	-	-	-	-	-	-	-	-	-	-	-	-	-	-	-	-	-	-	-	-	-
TpB_UVA_UV564_VEP_ALL.xlsx	TpB	UVA	UV564	16:37697239-37697239	T	non_coding_transcript_exon_variant	MODIFIER	Gm4600	ENSMUSG00000116529	Transcript	ENSMUST00000231714.1	processed_pseudogene	01 of 01	-	ENSMUST00000231714.1:n.102G>A	-	102	-	-	-	-	-	-	-1	-	MGI	-	-	-	-	-	-	-	-	-	-	-	-	-	-	-	-	-	-
TpB_UVA_UV564_VEP_ALL.xlsx	TpB	UVA	UV564	16:37697239-37697239	T	regulatory_region_variant	MODIFIER	-	-	RegulatoryFeature	ENSMUSR00000584201	-	-	-	-	-	-	-	-	-	-	-	-	-	-	-	-	-	-	-	-	-	-	-	-	-	-	-	-	-	-	-	-	-
TpB_UVA_UV564_VEP_ALL.xlsx	TpB	UVA	UV564	17:20623945-20623945	A	synonymous_variant	LOW	Fpr-rs3	ENSMUSG00000060701	Transcript	ENSMUST00000071189.1	protein_coding	01 of 01	-	ENSMUST00000071189.1:c.933C>T	ENSMUSP00000071179.1:p.Ser311%3D	933	933	311	S	tcC/tcT	-	-	-1	-	MGI	-	-	-	P1	CCDS49989.1	ENSMUSP00000071179	O88537	-	UPI0000026E92	-	-	-	-	-	-	-	-	-
TpB_UVA_UV564_VEP_ALL.xlsx	TpB	UVA	UV564	17:50741370-50741370	T	intron_variant	MODIFIER	Tbc1d5	ENSMUSG00000023923	Transcript	ENSMUST00000024717.9	protein_coding	-	21 of 21	ENSMUST00000024717.9:c.2148+106T>A	-	-	-	-	-	-	-	-	-1	-	MGI	-	-	1	P2	CCDS37650.1	ENSMUSP00000024717	Q80XQ2	-	UPI0000355537	-	-	-	-	-	-	-	-	-
TpB_UVA_UV564_VEP_ALL.xlsx	TpB	UVA	UV564	17:50741370-50741370	T	intron_variant	MODIFIER	Tbc1d5	ENSMUSG00000023923	Transcript	ENSMUST00000224528.1	protein_coding	-	22 of 22	ENSMUST00000224528.1:c.2214+106T>A	-	-	-	-	-	-	-	-	-1	-	MGI	-	-	-	A2	-	ENSMUSP00000153172	-	A0A286YDB3	UPI0000F4C24A	-	-	-	-	-	-	-	-	-
TpB_UVA_UV564_VEP_ALL.xlsx	TpB	UVA	UV564	17:50741370-50741370	T	intron_variant,non_coding_transcript_variant	MODIFIER	Tbc1d5	ENSMUSG00000023923	Transcript	ENSMUST00000224977.1	processed_transcript	-	21 of 21	ENSMUST00000224977.1:n.2465+106T>A	-	-	-	-	-	-	-	-	-1	-	MGI	-	-	-	-	-	-	-	-	-	-	-	-	-	-	-	-	-	-
TpB_UVA_UV564_VEP_ALL.xlsx	TpB	UVA	UV564	18:63544098-63544098	A	non_coding_transcript_exon_variant	MODIFIER	Gm6789	ENSMUSG00000117875	Transcript	ENSMUST00000237314.1	processed_pseudogene	01 of 01	-	ENSMUST00000237314.1:n.1038C>T	-	1038	-	-	-	-	-	-	-1	-	MGI	-	-	-	-	-	-	-	-	-	-	-	-	-	-	-	-	-	-
TpB_UVA_UV564_VEP_ALL.xlsx	TpB	UVA	UV564	18:63544098-63544098	A	regulatory_region_variant	MODIFIER	-	-	RegulatoryFeature	ENSMUSR00000136189	-	-	-	-	-	-	-	-	-	-	-	-	-	-	-	-	-	-	-	-	-	-	-	-	-	-	-	-	-	-	-	-	-
TpB_UVA_UV564_VEP_ALL.xlsx	TpB	UVA	UV564	19:39087566-39087566	A	splice_acceptor_variant	HIGH	Cyp2c65	ENSMUSG00000067231	Transcript	ENSMUST00000087236.4	protein_coding	-	06 of 08	ENSMUST00000087236.4:c.962-1G>A	-	-	-	-	-	-	-	-	1	-	MGI	-	-	1	P1	CCDS29791.1	ENSMUSP00000084489	-	Q148B1	UPI00001C62C2	-	-	-	-	-	-	-	-	-
TpB_UVA_UV564_VEP_ALL.xlsx	TpB	UVA	UV564	2:85776578-85776578	T	upstream_gene_variant	MODIFIER	Olfr1014	ENSMUSG00000059379	Transcript	ENSMUST00000076250.1	protein_coding	-	-	-	-	-	-	-	-	-	-	8	1	-	MGI	-	-	-	P1	CCDS16219.1	ENSMUSP00000075600	-	Q7TR95	UPI00000268DF	-	-	-	-	-	-	-	-	-
TpB_UVA_UV564_VEP_ALL.xlsx	TpB	UVA	UV564	2:85776578-85776578	T	5_prime_UTR_variant	MODIFIER	Olfr1014	ENSMUSG00000059379	Transcript	ENSMUST00000213453.2	protein_coding	02 of 02	-	ENSMUST00000213453.2:c.-8C>T	-	51	-	-	-	-	-	-	1	-	MGI	-	-	3	P1	CCDS16219.1	ENSMUSP00000150352	-	Q7TR95	UPI00000268DF	-	-	-	-	-	-	-	-	-
TpB_UVA_UV564_VEP_ALL.xlsx	TpB	UVA	UV564	2:85776578-85776578	T	upstream_gene_variant	MODIFIER	Gm49332	ENSMUSG00000111120	Transcript	ENSMUST00000215522.1	unprocessed_pseudogene	-	-	-	-	-	-	-	-	-	-	1340	1	-	MGI	-	-	-	-	-	-	-	-	-	-	-	-	-	-	-	-	-	-
TpB_UVA_UV564_VEP_ALL.xlsx	TpB	UVA	UV564	2:85776578-85776578	T	downstream_gene_variant	MODIFIER	Olfr1013	ENSMUSG00000053287	Transcript	ENSMUST00000216397.2	protein_coding	-	-	-	-	-	-	-	-	-	-	1929	1	-	MGI	-	-	2	P1	CCDS16218.1	ENSMUSP00000150201	Q7TR96	-	UPI00000268F5	-	-	-	-	-	-	-	-	-
TpB_UVA_UV564_VEP_ALL.xlsx	TpB	UVA	UV564	2:130654755-130654755	T	intron_variant	MODIFIER	Ddrgk1	ENSMUSG00000068290	Transcript	ENSMUST00000089559.10	protein_coding	-	07 of 08	ENSMUST00000089559.10:c.733-45G>A	-	-	-	-	-	-	-	-	-1	-	MGI	-	-	1	P1	CCDS38243.1	ENSMUSP00000086988	Q80WW9	-	UPI00001D4713	-	-	-	-	-	-	-	-	-
TpB_UVA_UV564_VEP_ALL.xlsx	TpB	UVA	UV564	2:130654755-130654755	T	downstream_gene_variant	MODIFIER	Ddrgk1	ENSMUSG00000068290	Transcript	ENSMUST00000124559.1	processed_transcript	-	-	-	-	-	-	-	-	-	-	444	-1	-	MGI	-	-	5	-	-	-	-	-	-	-	-	-	-	-	-	-	-	-
TpB_UVA_UV564_VEP_ALL.xlsx	TpB	UVA	UV564	2:130654755-130654755	T	intron_variant,NMD_transcript_variant	MODIFIER	Ddrgk1	ENSMUSG00000068290	Transcript	ENSMUST00000134044.7	nonsense_mediated_decay	-	04 of 05	ENSMUST00000134044.7:c.*162-45G>A	-	-	-	-	-	-	-	-	-1	cds_start_NF	MGI	-	-	5	-	-	ENSMUSP00000114535	-	F7AIJ1	UPI000173A867	-	-	-	-	-	-	-	-	-
TpB_UVA_UV564_VEP_ALL.xlsx	TpB	UVA	UV564	2:130654755-130654755	T	downstream_gene_variant	MODIFIER	Ddrgk1	ENSMUSG00000068290	Transcript	ENSMUST00000135072.1	protein_coding	-	-	-	-	-	-	-	-	-	-	3931	-1	cds_end_NF	MGI	-	-	5	-	-	ENSMUSP00000121190	-	B0R015	UPI000165DC27	-	-	-	-	-	-	-	-	-
TpB_UVA_UV564_VEP_ALL.xlsx	TpB	UVA	UV564	2:130654755-130654755	T	intron_variant,non_coding_transcript_variant	MODIFIER	Ddrgk1	ENSMUSG00000068290	Transcript	ENSMUST00000135167.7	processed_transcript	-	02 of 03	ENSMUST00000135167.7:n.342-45G>A	-	-	-	-	-	-	-	-	-1	-	MGI	-	-	2	-	-	-	-	-	-	-	-	-	-	-	-	-	-	-
TpB_UVA_UV564_VEP_ALL.xlsx	TpB	UVA	UV564	2:130654755-130654755	T	non_coding_transcript_exon_variant	MODIFIER	Ddrgk1	ENSMUSG00000068290	Transcript	ENSMUST00000153271.1	retained_intron	01 of 02	-	ENSMUST00000153271.1:n.23G>A	-	23	-	-	-	-	-	-	-1	-	MGI	-	-	2	-	-	-	-	-	-	-	-	-	-	-	-	-	-	-
TpB_UVA_UV564_VEP_ALL.xlsx	TpB	UVA	UV564	3:67594309-67594309	A	synonymous_variant	LOW	Mfsd1	ENSMUSG00000027775	Transcript	ENSMUST00000029344.9	protein_coding	08 of 16	-	ENSMUST00000029344.9:c.660G>A	ENSMUSP00000029344.8:p.Thr220%3D	737	660	220	T	acG/acA	-	-	1	-	MGI	-	-	1	P1	CCDS38450.1	ENSMUSP00000029344	Q9DC37	-	UPI0000022CBD	-	-	-	-	-	-	-	-	-
TpB_UVA_UV564_VEP_ALL.xlsx	TpB	UVA	UV564	3:67594309-67594309	A	non_coding_transcript_exon_variant	MODIFIER	Mfsd1	ENSMUSG00000027775	Transcript	ENSMUST00000192776.1	processed_transcript	07 of 09	-	ENSMUST00000192776.1:n.478G>A	-	478	-	-	-	-	-	-	1	-	MGI	-	-	3	-	-	-	-	-	-	-	-	-	-	-	-	-	-	-
TpB_UVA_UV564_VEP_ALL.xlsx	TpB	UVA	UV564	4:88827598-88827598	T	synonymous_variant	LOW	Ifna6	ENSMUSG00000101252	Transcript	ENSMUST00000105146.3	protein_coding	01 of 01	-	ENSMUST00000105146.3:c.183C>T	ENSMUSP00000100777.3:p.Phe61%3D	183	183	61	F	ttC/ttT	-	-	1	-	MGI	-	-	-	P1	CCDS38811.1	ENSMUSP00000100777	-	Q810G5	UPI000017DD18	-	-	-	-	-	-	-	-	-
TpB_UVA_UV564_VEP_ALL.xlsx	TpB	UVA	UV564	4:146173880-146173880	G	intron_variant	MODIFIER	Zfp600	ENSMUSG00000066007	Transcript	ENSMUST00000092750.11	protein_coding	-	02 of 04	ENSMUST00000092750.11:c.-11+15429A>G	-	-	-	-	-	-	-	-	1	-	MGI	-	-	1	P1	CCDS51373.1	ENSMUSP00000090425	-	A2A7V0	UPI000059E208	-	-	-	-	-	-	-	-	-
TpB_UVA_UV564_VEP_ALL.xlsx	TpB	UVA	UV564	4:146173880-146173880	G	upstream_gene_variant	MODIFIER	Gm13170	ENSMUSG00000081522	Transcript	ENSMUST00000119716.1	processed_pseudogene	-	-	-	-	-	-	-	-	-	-	4244	1	-	MGI	-	-	-	-	-	-	-	-	-	-	-	-	-	-	-	-	-	-
TpB_UVA_UV564_VEP_ALL.xlsx	TpB	UVA	UV564	4:146173880-146173880	G	intron_variant	MODIFIER	Zfp600	ENSMUSG00000066007	Transcript	ENSMUST00000131932.1	protein_coding	-	02 of 04	ENSMUST00000131932.1:c.-11+8265A>G	-	-	-	-	-	-	-	-	1	cds_end_NF	MGI	-	-	3	-	-	ENSMUSP00000117892	-	A2A7U9	UPI000059E20A	-	-	-	-	-	-	-	-	-
TpB_UVA_UV564_VEP_ALL.xlsx	TpB	UVA	UV564	4:146173880-146173880	G	intron_variant,non_coding_transcript_variant	MODIFIER	Gm13165	ENSMUSG00000086654	Transcript	ENSMUST00000152923.1	antisense	-	01 of 01	ENSMUST00000152923.1:n.212-6187T>C	-	-	-	-	-	-	-	-	-1	-	MGI	-	-	5	-	-	-	-	-	-	-	-	-	-	-	-	-	-	-
TpB_UVA_UV564_VEP_ALL.xlsx	TpB	UVA	UV564	4:146173880-146173880	G	intron_variant,non_coding_transcript_variant	MODIFIER	Gm13165	ENSMUSG00000086654	Transcript	ENSMUST00000153595.1	antisense	-	01 of 01	ENSMUST00000153595.1:n.86-6187T>C	-	-	-	-	-	-	-	-	-1	-	MGI	-	-	5	-	-	-	-	-	-	-	-	-	-	-	-	-	-	-
TpB_UVA_UV564_VEP_ALL.xlsx	TpB	UVA	UV564	4:146173880-146173880	G	intron_variant	MODIFIER	Zfp600	ENSMUSG00000066007	Transcript	ENSMUST00000168483.8	protein_coding	-	02 of 04	ENSMUST00000168483.8:c.-11+15429A>G	-	-	-	-	-	-	-	-	1	-	MGI	-	-	2	P1	CCDS51373.1	ENSMUSP00000126879	-	A2A7V0	UPI000059E208	-	-	-	-	-	-	-	-	-
TpB_UVA_UV564_VEP_ALL.xlsx	TpB	UVA	UV564	5:10118462-10118462	C	downstream_gene_variant	MODIFIER	Gm5715	ENSMUSG00000105173	Transcript	ENSMUST00000196854.1	processed_pseudogene	-	-	-	-	-	-	-	-	-	-	415	1	-	MGI	-	-	-	-	-	-	-	-	-	-	-	-	-	-	-	-	-	-
TpB_UVA_UV564_VEP_ALL.xlsx	TpB	UVA	UV564	5:15620607-15620607	T	intron_variant	MODIFIER	Speer4d	ENSMUSG00000070933	Transcript	ENSMUST00000095006.8	protein_coding	-	02 of 04	ENSMUST00000095006.8:c.167+162A>T	-	-	-	-	-	-	-	-	1	-	MGI	-	-	1	P1	CCDS19095.1	ENSMUSP00000092615	-	L7N216	UPI000024F7B7	-	-	-	-	-	-	-	-	-
TpB_UVA_UV564_VEP_ALL.xlsx	TpB	UVA	UV564	5:15620607-15620607	T	intron_variant	MODIFIER	Speer4d	ENSMUSG00000070933	Transcript	ENSMUST00000119100.1	protein_coding	-	01 of 03	ENSMUST00000119100.1:c.11+162A>T	-	-	-	-	-	-	-	-	1	-	MGI	-	-	2	-	-	ENSMUSP00000113289	-	L7N261	UPI00016117A7	-	-	-	-	-	-	-	-	-
TpB_UVA_UV564_VEP_ALL.xlsx	TpB	UVA	UV564	5:15620607-15620607	T	intron_variant,non_coding_transcript_variant	MODIFIER	Gm21847	ENSMUSG00000094230	Transcript	ENSMUST00000178227.5	antisense	-	02 of 02	ENSMUST00000178227.5:n.223-35227A>T	-	-	-	-	-	-	-	-	1	-	MGI	-	-	5	-	-	-	-	-	-	-	-	-	-	-	-	-	-	-
TpB_UVA_UV564_VEP_ALL.xlsx	TpB	UVA	UV564	5:15620607-15620607	T	regulatory_region_variant	MODIFIER	-	-	RegulatoryFeature	ENSMUSR00000676467	-	-	-	-	-	-	-	-	-	-	-	-	-	-	-	-	-	-	-	-	-	-	-	-	-	-	-	-	-	-	-	-	-
TpB_UVA_UV564_VEP_ALL.xlsx	TpB	UVA	UV564	5:26086583-26086583	G	intron_variant	MODIFIER	Gm10471	ENSMUSG00000073116	Transcript	ENSMUST00000094946.4	protein_coding	-	02 of 04	ENSMUST00000094946.4:c.255-31A>C	-	-	-	-	-	-	-	-	-1	-	MGI	-	-	5	P1	CCDS80236.1	ENSMUSP00000092553	-	E9Q1C7	UPI0001D089C7	-	-	-	-	-	-	-	-	-
TpB_UVA_UV564_VEP_ALL.xlsx	TpB	UVA	UV564	5:101305519-101305519	A	upstream_gene_variant	MODIFIER	Cycs-ps2	ENSMUSG00000105965	Transcript	ENSMUST00000197114.1	processed_pseudogene	-	-	-	-	-	-	-	-	-	-	59	1	-	MGI	-	-	-	-	-	-	-	-	-	-	-	-	-	-	-	-	-	-
TpB_UVA_UV564_VEP_ALL.xlsx	TpB	UVA	UV564	5:109847652-109847652	C	intergenic_variant	MODIFIER	-	-	-	-	-	-	-	-	-	-	-	-	-	-	-	-	-	-	-	-	-	-	-	-	-	-	-	-	-	-	-	-	-	-	-	-	-
TpB_UVA_UV564_VEP_ALL.xlsx	TpB	UVA	UV564	5:112693261-112693261	C	missense_variant	MODERATE	Myo18b	ENSMUSG00000072720	Transcript	ENSMUST00000086617.10	protein_coding	43 of 44	-	ENSMUST00000086617.10:c.6665C>G	ENSMUSP00000083810.4:p.Ala2222Gly	6893	6665	2222	A/G	gCc/gGc	-	-	-1	-	MGI	-	-	5	P1	CCDS51618.1	ENSMUSP00000083810	-	E9PV66	UPI0000F4EDB0	tolerated(0.38)	-	-	-	-	-	-	-	-
TpB_UVA_UV564_VEP_ALL.xlsx	TpB	UVA	UV564	5:112693261-112693261	C	non_coding_transcript_exon_variant	MODIFIER	Myo18b	ENSMUSG00000072720	Transcript	ENSMUST00000182189.1	processed_transcript	10 of 11	-	ENSMUST00000182189.1:n.1125C>G	-	1125	-	-	-	-	-	-	-1	-	MGI	-	-	1	-	-	-	-	-	-	-	-	-	-	-	-	-	-	-
TpB_UVA_UV564_VEP_ALL.xlsx	TpB	UVA	UV564	5:112693261-112693261	C	regulatory_region_variant	MODIFIER	-	-	RegulatoryFeature	ENSMUSR00000686907	-	-	-	-	-	-	-	-	-	-	-	-	-	-	-	-	-	-	-	-	-	-	-	-	-	-	-	-	-	-	-	-	-
TpB_UVA_UV564_VEP_ALL.xlsx	TpB	UVA	UV564	5:120606629-120606629	A	downstream_gene_variant	MODIFIER	Rita1	ENSMUSG00000029600	Transcript	ENSMUST00000031599.8	protein_coding	-	-	-	-	-	-	-	-	-	-	2429	-1	-	MGI	-	-	1	P1	CCDS51635.1	ENSMUSP00000031599	Q9D1H0	-	UPI0000023259	-	-	-	-	-	-	-	-	-
TpB_UVA_UV564_VEP_ALL.xlsx	TpB	UVA	UV564	5:120606629-120606629	A	splice_region_variant,intron_variant	LOW	Iqcd	ENSMUSG00000029601	Transcript	ENSMUST00000069259.8	protein_coding	-	04 of 04	ENSMUST00000069259.8:c.928-6G>A	-	-	-	-	-	-	-	-	1	-	MGI	-	-	1	A2	-	ENSMUSP00000069167	Q9D3V1	-	UPI00001F260B	-	-	-	-	-	-	-	-	-
TpB_UVA_UV564_VEP_ALL.xlsx	TpB	UVA	UV564	5:120606629-120606629	A	splice_region_variant,intron_variant	LOW	Iqcd	ENSMUSG00000029601	Transcript	ENSMUST00000094391.5	protein_coding	-	04 of 04	ENSMUST00000094391.5:c.1027-6G>A	-	-	-	-	-	-	-	-	1	-	MGI	-	-	1	P2	CCDS19621.1	ENSMUSP00000091955	Q9D3V1	B2RPX1	UPI000002325A	-	-	-	-	-	-	-	-	-
TpB_UVA_UV564_VEP_ALL.xlsx	TpB	UVA	UV564	5:120606629-120606629	A	intron_variant	MODIFIER	Rita1	ENSMUSG00000029600	Transcript	ENSMUST00000111884.7	protein_coding	-	02 of 02	ENSMUST00000111884.7:c.269+4749C>T	-	-	-	-	-	-	-	-	-1	-	MGI	-	-	2	-	-	ENSMUSP00000107515	-	D3Z228	UPI00015AA3AD	-	-	-	-	-	-	-	-	-
TpB_UVA_UV564_VEP_ALL.xlsx	TpB	UVA	UV564	5:120606629-120606629	A	downstream_gene_variant	MODIFIER	Rita1	ENSMUSG00000029600	Transcript	ENSMUST00000136070.7	processed_transcript	-	-	-	-	-	-	-	-	-	-	413	-1	-	MGI	-	-	5	-	-	-	-	-	-	-	-	-	-	-	-	-	-	-
TpB_UVA_UV564_VEP_ALL.xlsx	TpB	UVA	UV564	5:120606629-120606629	A	downstream_gene_variant	MODIFIER	Rita1	ENSMUSG00000029600	Transcript	ENSMUST00000140554.1	protein_coding	-	-	-	-	-	-	-	-	-	-	3282	-1	cds_end_NF	MGI	-	-	5	-	-	ENSMUSP00000116344	-	D3Z5Q7	UPI00015AA3AC	-	-	-	-	-	-	-	-	-
TpB_UVA_UV564_VEP_ALL.xlsx	TpB	UVA	UV564	5:120606629-120606629	A	upstream_gene_variant	MODIFIER	Rita1	ENSMUSG00000029600	Transcript	ENSMUST00000147596.1	processed_transcript	-	-	-	-	-	-	-	-	-	-	912	-1	-	MGI	-	-	2	-	-	-	-	-	-	-	-	-	-	-	-	-	-	-
TpB_UVA_UV564_VEP_ALL.xlsx	TpB	UVA	UV564	5:120606629-120606629	A	intron_variant	MODIFIER	Rita1	ENSMUSG00000029600	Transcript	ENSMUST00000156356.1	protein_coding	-	01 of 02	ENSMUST00000156356.1:c.261-2382C>T	-	-	-	-	-	-	-	-	-1	cds_start_NF	MGI	-	-	5	-	-	ENSMUSP00000122910	-	F6Y0D0	UPI00015AA3AB	-	-	-	-	-	-	-	-	-
TpB_UVA_UV564_VEP_ALL.xlsx	TpB	UVA	UV564	5:120606629-120606629	A	downstream_gene_variant	MODIFIER	Rita1	ENSMUSG00000029600	Transcript	ENSMUST00000177800.7	protein_coding	-	-	-	-	-	-	-	-	-	-	2429	-1	-	MGI	-	-	5	P1	CCDS51635.1	ENSMUSP00000136946	Q9D1H0	-	UPI0000023259	-	-	-	-	-	-	-	-	-
TpB_UVA_UV564_VEP_ALL.xlsx	TpB	UVA	UV564	5:120606629-120606629	A	regulatory_region_variant	MODIFIER	-	-	RegulatoryFeature	ENSMUSR00000427773	-	-	-	-	-	-	-	-	-	-	-	-	-	-	-	-	-	-	-	-	-	-	-	-	-	-	-	-	-	-	-	-	-
TpB_UVA_UV564_VEP_ALL.xlsx	TpB	UVA	UV564	6:5961831-5961831	C	intron_variant	MODIFIER	Dync1i1	ENSMUSG00000029757	Transcript	ENSMUST00000115554.3	protein_coding	-	09 of 15	ENSMUST00000115554.3:c.910-10T>C	-	-	-	-	-	-	-	-	1	-	MGI	-	-	1	A1	CCDS57408.1	ENSMUSP00000111216	O88485	-	UPI0000435516	-	-	-	-	-	-	-	-	-
TpB_UVA_UV564_VEP_ALL.xlsx	TpB	UVA	UV564	6:5961831-5961831	C	intron_variant	MODIFIER	Dync1i1	ENSMUSG00000029757	Transcript	ENSMUST00000115555.7	protein_coding	-	10 of 16	ENSMUST00000115555.7:c.1021-10T>C	-	-	-	-	-	-	-	-	1	-	MGI	-	-	5	A1	-	ENSMUSP00000111217	-	D3Z0M6	UPI000024DEE7	-	-	-	-	-	-	-	-	-
TpB_UVA_UV564_VEP_ALL.xlsx	TpB	UVA	UV564	6:5961831-5961831	C	intron_variant	MODIFIER	Dync1i1	ENSMUSG00000029757	Transcript	ENSMUST00000115556.7	protein_coding	-	10 of 16	ENSMUST00000115556.7:c.937-10T>C	-	-	-	-	-	-	-	-	1	-	MGI	-	-	1	-	CCDS57409.1	ENSMUSP00000111218	-	Q3TYJ3	UPI00005AD203	-	-	-	-	-	-	-	-	-
TpB_UVA_UV564_VEP_ALL.xlsx	TpB	UVA	UV564	6:5961831-5961831	C	intron_variant	MODIFIER	Dync1i1	ENSMUSG00000029757	Transcript	ENSMUST00000115559.9	protein_coding	-	10 of 16	ENSMUST00000115559.9:c.970-10T>C	-	-	-	-	-	-	-	-	1	-	MGI	-	-	1	P3	CCDS19903.1	ENSMUSP00000111221	O88485	-	UPI00000232C9	-	-	-	-	-	-	-	-	-
TpB_UVA_UV564_VEP_ALL.xlsx	TpB	UVA	UV564	6:5961831-5961831	C	downstream_gene_variant	MODIFIER	1700019G24Rik	ENSMUSG00000085416	Transcript	ENSMUST00000130004.1	antisense	-	-	-	-	-	-	-	-	-	-	2078	-1	-	MGI	-	-	1	-	-	-	-	-	-	-	-	-	-	-	-	-	-	-
TpB_UVA_UV564_VEP_ALL.xlsx	TpB	UVA	UV564	7:4943983-4943983	T	missense_variant	MODERATE	Ssc5d	ENSMUSG00000035279	Transcript	ENSMUST00000057612.8	protein_coding	14 of 14	-	ENSMUST00000057612.8:c.3335C>T	ENSMUSP00000052126.7:p.Thr1112Ile	3505	3335	1112	T/I	aCc/aTc	-	-	1	-	MGI	-	-	1	P1	CCDS20750.1	ENSMUSP00000052126	Q8BV57	-	UPI000002778C	deleterious_low_confidence(0.03)	-	-	-	-	-	-	-	-
TpB_UVA_UV564_VEP_ALL.xlsx	TpB	UVA	UV564	7:4943983-4943983	T	downstream_gene_variant	MODIFIER	Ssc5d	ENSMUSG00000035279	Transcript	ENSMUST00000207310.1	retained_intron	-	-	-	-	-	-	-	-	-	-	1116	1	-	MGI	-	-	2	-	-	-	-	-	-	-	-	-	-	-	-	-	-	-
TpB_UVA_UV564_VEP_ALL.xlsx	TpB	UVA	UV564	7:4943983-4943983	T	intron_variant	MODIFIER	Sbk2	ENSMUSG00000030433	Transcript	ENSMUST00000208109.1	protein_coding	-	03 of 03	ENSMUST00000208109.1:c.457-2767G>A	-	-	-	-	-	-	-	-	-1	-	MGI	-	-	5	-	-	ENSMUSP00000146819	-	A0A140LIH2	UPI0007699E32	-	-	-	-	-	-	-	-	-
TpB_UVA_UV564_VEP_ALL.xlsx	TpB	UVA	UV564	7:4943983-4943983	T	regulatory_region_variant	MODIFIER	-	-	RegulatoryFeature	ENSMUSR00000239236	-	-	-	-	-	-	-	-	-	-	-	-	-	-	-	-	-	-	-	-	-	-	-	-	-	-	-	-	-	-	-	-	-
TpB_UVA_UV564_VEP_ALL.xlsx	TpB	UVA	UV564	7:103470621-103470621	C	missense_variant	MODERATE	Olfr608	ENSMUSG00000073948	Transcript	ENSMUST00000213546.2	protein_coding	01 of 01	-	ENSMUST00000213546.2:c.581T>C	ENSMUSP00000150595.1:p.Phe194Ser	745	581	194	F/S	tTc/tCc	-	-	1	-	MGI	-	-	-	P1	CCDS21575.1	ENSMUSP00000150595	-	E9Q564	UPI00000260D5	tolerated(0.27)	-	-	-	-	-	-	-	-
TpB_UVA_UV564_VEP_ALL.xlsx	TpB	UVA	UV564	8:19697778-19697778	T	downstream_gene_variant	MODIFIER	Gm6483	ENSMUSG00000087153	Transcript	ENSMUST00000155660.8	unprocessed_pseudogene	-	-	-	-	-	-	-	-	-	-	42	1	-	MGI	-	-	-	-	-	-	-	-	-	-	-	-	-	-	-	-	-	-
TpB_UVA_UV564_VEP_ALL.xlsx	TpB	UVA	UV564	8:19697778-19697778	T	regulatory_region_variant	MODIFIER	-	-	RegulatoryFeature	ENSMUSR00000728888	-	-	-	-	-	-	-	-	-	-	-	-	-	-	-	-	-	-	-	-	-	-	-	-	-	-	-	-	-	-	-	-	-
TpB_UVA_UV564_VEP_ALL.xlsx	TpB	UVA	UV564	8:117117604-117117604	G	synonymous_variant	LOW	Bco1	ENSMUSG00000031845	Transcript	ENSMUST00000034308.14	protein_coding	07 of 11	-	ENSMUST00000034308.14:c.1056A>G	ENSMUSP00000034308.8:p.Ser352%3D	1233	1056	352	S	tcA/tcG	-	-	1	-	MGI	-	-	1	P3	CCDS22697.1	ENSMUSP00000034308	Q9JJS6	Q05AC0	UPI00000238D1	-	-	-	-	-	-	-	-	-
TpB_UVA_UV564_VEP_ALL.xlsx	TpB	UVA	UV564	8:117117604-117117604	G	synonymous_variant	LOW	Bco1	ENSMUSG00000031845	Transcript	ENSMUST00000167370.7	protein_coding	07 of 11	-	ENSMUST00000167370.7:c.1056A>G	ENSMUSP00000132042.1:p.Ser352%3D	1222	1056	352	S	tcA/tcG	-	-	1	-	MGI	-	-	5	A2	CCDS52679.1	ENSMUSP00000132042	-	E9Q321	UPI0001AE826C	-	-	-	-	-	-	-	-	-
TpB_UVA_UV564_VEP_ALL.xlsx	TpB	UVA	UV564	8:117117604-117117604	G	synonymous_variant	LOW	Bco1	ENSMUSG00000031845	Transcript	ENSMUST00000176860.1	protein_coding	07 of 12	-	ENSMUST00000176860.1:c.1056A>G	ENSMUSP00000134815.1:p.Ser352%3D	1089	1056	352	S	tcA/tcG	-	-	1	-	MGI	-	-	1	A2	CCDS52679.1	ENSMUSP00000134815	-	E9Q321	UPI0001AE826C	-	-	-	-	-	-	-	-	-
TpB_UVA_UV564_VEP_ALL.xlsx	TpB	UVA	UV564	8:117411179-117411179	C	intron_variant	MODIFIER	Cmip	ENSMUSG00000034390	Transcript	ENSMUST00000095172.5	protein_coding	-	03 of 20	ENSMUST00000095172.5:c.214-82T>C	-	-	-	-	-	-	-	-	1	-	MGI	-	-	1	-	CCDS52681.1	ENSMUSP00000092795	Q9D486	-	UPI000024E282	-	-	-	-	-	-	-	-	-
TpB_UVA_UV564_VEP_ALL.xlsx	TpB	UVA	UV564	8:117411179-117411179	C	intron_variant	MODIFIER	Cmip	ENSMUSG00000034390	Transcript	ENSMUST00000166750.8	protein_coding	-	03 of 20	ENSMUST00000166750.8:c.478-82T>C	-	-	-	-	-	-	-	-	1	-	MGI	-	-	5	P1	CCDS52680.1	ENSMUSP00000130264	Q9D486	-	UPI00001E4428	-	-	-	-	-	-	-	-	-
TpB_UVA_UV564_VEP_ALL.xlsx	TpB	UVA	UV564	8:117411179-117411179	C	intron_variant,non_coding_transcript_variant	MODIFIER	Cmip	ENSMUSG00000034390	Transcript	ENSMUST00000211913.1	retained_intron	-	03 of 10	ENSMUST00000211913.1:n.463-82T>C	-	-	-	-	-	-	-	-	1	-	MGI	-	-	1	-	-	-	-	-	-	-	-	-	-	-	-	-	-	-
TpB_UVA_UV564_VEP_ALL.xlsx	TpB	UVA	UV564	8:117411179-117411179	C	regulatory_region_variant	MODIFIER	-	-	RegulatoryFeature	ENSMUSR00000266220	-	-	-	-	-	-	-	-	-	-	-	-	-	-	-	-	-	-	-	-	-	-	-	-	-	-	-	-	-	-	-	-	-
TpB_UVA_UV564_VEP_ALL.xlsx	TpB	UVA	UV564	9:4432748-4432748	T	intron_variant	MODIFIER	Gria4	ENSMUSG00000025892	Transcript	ENSMUST00000027020.12	protein_coding	-	15 of 16	ENSMUST00000027020.12:c.2409+25G>A	-	-	-	-	-	-	-	-	-1	-	MGI	-	-	5	A1	CCDS52715.1	ENSMUSP00000027020	-	G5E863	UPI000002272A	-	-	-	-	-	-	-	-	-
TpB_UVA_UV564_VEP_ALL.xlsx	TpB	UVA	UV564	9:4432748-4432748	T	intron_variant	MODIFIER	Gria4	ENSMUSG00000025892	Transcript	ENSMUST00000063508.14	protein_coding	-	14 of 16	ENSMUST00000063508.14:c.2295-5604G>A	-	-	-	-	-	-	-	-	-1	-	MGI	-	-	1	P3	CCDS22797.1	ENSMUSP00000066980	Q9Z2W8	-	UPI00002131A3	-	-	-	-	-	-	-	-	-
TpB_UVA_UV564_VEP_ALL.xlsx	TpB	UVA	UV564	9:4432748-4432748	T	intron_variant	MODIFIER	Gria4	ENSMUSG00000025892	Transcript	ENSMUST00000212533.1	protein_coding	-	14 of 15	ENSMUST00000212533.1:c.2409+25G>A	-	-	-	-	-	-	-	-	-1	-	MGI	-	-	1	A1	CCDS52715.1	ENSMUSP00000148533	-	G5E863	UPI000002272A	-	-	-	-	-	-	-	-	-
TpB_UVA_UV564_VEP_ALL.xlsx	TpB	UVA	UV564	9:60863451-60863451	G	intron_variant	MODIFIER	Uaca	ENSMUSG00000034485	Transcript	ENSMUST00000050183.6	protein_coding	-	12 of 18	ENSMUST00000050183.6:c.1053+28T>G	-	-	-	-	-	-	-	-	1	-	MGI	-	-	1	P2	CCDS23259.1	ENSMUSP00000062047	-	A0A0R4J0S7	UPI0000029840	-	-	-	-	-	-	-	-	-
TpB_UVA_UV564_VEP_ALL.xlsx	TpB	UVA	UV564	9:60863451-60863451	G	intron_variant	MODIFIER	Uaca	ENSMUSG00000034485	Transcript	ENSMUST00000214354.1	protein_coding	-	12 of 18	ENSMUST00000214354.1:c.1047+28T>G	-	-	-	-	-	-	-	-	1	-	MGI	-	-	5	A2	-	ENSMUSP00000151172	-	A0A1L1SVG0	UPI0003D704BE	-	-	-	-	-	-	-	-	-
TpB_UVA_UV564_VEP_ALL.xlsx	TpB	UVA	UV564	9:60863451-60863451	G	non_coding_transcript_exon_variant	MODIFIER	Uaca	ENSMUSG00000034485	Transcript	ENSMUST00000214997.1	retained_intron	01 of 07	-	ENSMUST00000214997.1:n.1038T>G	-	1038	-	-	-	-	-	-	1	-	MGI	-	-	1	-	-	-	-	-	-	-	-	-	-	-	-	-	-	-
TpB_UVA_UV564_VEP_ALL.xlsx	TpB	UVA	UV564	9:60863451-60863451	G	upstream_gene_variant	MODIFIER	Uaca	ENSMUSG00000034485	Transcript	ENSMUST00000216574.1	retained_intron	-	-	-	-	-	-	-	-	-	-	2694	1	-	MGI	-	-	2	-	-	-	-	-	-	-	-	-	-	-	-	-	-	-
TpB_UVA_UV564_VEP_ALL.xlsx	TpB	UVA	UV564	9:60863451-60863451	G	intron_variant	MODIFIER	Uaca	ENSMUSG00000034485	Transcript	ENSMUST00000217656.1	protein_coding	-	12 of 19	ENSMUST00000217656.1:c.1031+28T>G	-	-	-	-	-	-	-	-	1	cds_start_NF	MGI	-	-	1	-	-	ENSMUSP00000150547	-	A0A1L1STY4	UPI0008FC1CD1	-	-	-	-	-	-	-	-	-
TpB_UVA_UV564_VEP_ALL.xlsx	TpB	UVA	UV564	9:108860487-108860487	A	intron_variant	MODIFIER	Slc26a6	ENSMUSG00000023259	Transcript	ENSMUST00000098376.9	protein_coding	-	14 of 20	ENSMUST00000098376.9:c.1534-116G>A	-	-	-	-	-	-	-	-	1	-	MGI	-	-	5	A2	-	ENSMUSP00000095979	-	A0A0A0MQB3	UPI0002747288	-	-	-	-	-	-	-	-	-
TpB_UVA_UV564_VEP_ALL.xlsx	TpB	UVA	UV564	9:108860487-108860487	A	intron_variant	MODIFIER	Slc26a6	ENSMUSG00000023259	Transcript	ENSMUST00000188557.6	protein_coding	-	14 of 17	ENSMUST00000188557.6:c.1534-116G>A	-	-	-	-	-	-	-	-	1	cds_end_NF	MGI	-	-	1	P5	-	ENSMUSP00000140849	-	A0A087WS07	UPI0000D8B307	-	-	-	-	-	-	-	-	-
TpB_UVA_UV564_VEP_ALL.xlsx	TpB	UVA	UV564	9:108860487-108860487	A	intron_variant	MODIFIER	Slc26a6	ENSMUSG00000023259	Transcript	ENSMUST00000192507.5	protein_coding	-	13 of 16	ENSMUST00000192507.5:c.1534-116G>A	-	-	-	-	-	-	-	-	1	cds_end_NF	MGI	-	-	1	P5	-	ENSMUSP00000141336	-	A0A087WS07	UPI0000D8B307	-	-	-	-	-	-	-	-	-
TpB_UVA_UV564_VEP_ALL.xlsx	TpB	UVA	UV564	9:108860487-108860487	A	intron_variant,NMD_transcript_variant	MODIFIER	Slc26a6	ENSMUSG00000023259	Transcript	ENSMUST00000192559.5	nonsense_mediated_decay	-	14 of 15	ENSMUST00000192559.5:c.*759-116G>A	-	-	-	-	-	-	-	-	1	-	MGI	-	-	1	A2	-	ENSMUSP00000141632	-	A0A0A6YWP3	UPI00053BD645	-	-	-	-	-	-	-	-	-
TpB_UVA_UV564_VEP_ALL.xlsx	TpB	UVA	UV564	9:108860487-108860487	A	intron_variant	MODIFIER	Slc26a6	ENSMUSG00000023259	Transcript	ENSMUST00000193291.5	protein_coding	-	14 of 17	ENSMUST00000193291.5:c.1534-116G>A	-	-	-	-	-	-	-	-	1	cds_end_NF	MGI	-	-	1	P5	-	ENSMUSP00000142250	-	A0A087WS07	UPI0000D8B307	-	-	-	-	-	-	-	-	-
TpB_UVA_UV564_VEP_ALL.xlsx	TpB	UVA	UV564	9:108860487-108860487	A	intron_variant,non_coding_transcript_variant	MODIFIER	Slc26a6	ENSMUSG00000023259	Transcript	ENSMUST00000193463.5	retained_intron	-	11 of 14	ENSMUST00000193463.5:n.3633-116G>A	-	-	-	-	-	-	-	-	1	-	MGI	-	-	2	-	-	-	-	-	-	-	-	-	-	-	-	-	-	-
TpB_UVA_UV564_VEP_ALL.xlsx	TpB	UVA	UV564	9:108860487-108860487	A	intron_variant,NMD_transcript_variant	MODIFIER	Slc26a6	ENSMUSG00000023259	Transcript	ENSMUST00000193874.1	nonsense_mediated_decay	-	14 of 17	ENSMUST00000193874.1:c.*759-116G>A	-	-	-	-	-	-	-	-	1	-	MGI	-	-	5	A2	-	ENSMUSP00000141409	-	A0A0A6YWP3	UPI00053BD645	-	-	-	-	-	-	-	-	-
TpB_UVA_UV564_VEP_ALL.xlsx	TpB	UVA	UV564	9:108860487-108860487	A	intron_variant,non_coding_transcript_variant	MODIFIER	Slc26a6	ENSMUSG00000023259	Transcript	ENSMUST00000195646.5	retained_intron	-	12 of 15	ENSMUST00000195646.5:n.2023-116G>A	-	-	-	-	-	-	-	-	1	-	MGI	-	-	2	-	-	-	-	-	-	-	-	-	-	-	-	-	-	-
TpB_UVA_UV564_VEP_ALL.xlsx	TpB	UVA	UV564	9:109816742-109816742	T	5_prime_UTR_variant	MODIFIER	Spink8	ENSMUSG00000050074	Transcript	ENSMUST00000118732.3	protein_coding	01 of 04	-	ENSMUST00000118732.3:c.-20C>T	-	116	-	-	-	-	-	-	1	-	MGI	-	-	1	-	-	ENSMUSP00000112990	-	Q8C1F8	UPI000000BCA0	-	-	-	-	-	-	-	-	-
TpB_UVA_UV564_VEP_ALL.xlsx	TpB	UVA	UV564	9:109816742-109816742	T	5_prime_UTR_variant	MODIFIER	Spink8	ENSMUSG00000050074	Transcript	ENSMUST00000198988.4	protein_coding	01 of 05	-	ENSMUST00000198988.4:c.-20C>T	-	199	-	-	-	-	-	-	1	-	MGI	-	-	1	P1	CCDS40777.1	ENSMUSP00000142586	Q09TK9	-	UPI00001C45BB	-	-	-	-	-	-	-	-	-
TpB_UVA_UV564_VEP_ALL.xlsx	TpB	UVA	UV564	9:109816742-109816742	T	intron_variant	MODIFIER	Spink8	ENSMUSG00000050074	Transcript	ENSMUST00000200555.4	protein_coding	-	01 of 03	ENSMUST00000200555.4:c.-10-10C>T	-	-	-	-	-	-	-	-	1	cds_end_NF	MGI	-	-	5	-	-	ENSMUSP00000142856	-	A0A0G2JEP9	UPI00016119D9	-	-	-	-	-	-	-	-	-
TpB_UVA_UV564_VEP_ALL.xlsx	TpB	UVA	UV564	9:109816742-109816742	T	regulatory_region_variant	MODIFIER	-	-	RegulatoryFeature	ENSMUSR00000756123	-	-	-	-	-	-	-	-	-	-	-	-	-	-	-	-	-	-	-	-	-	-	-	-	-	-	-	-	-	-	-	-	-
TpB_UVA_UV564_VEP_ALL.xlsx	TpB	UVA	UV564	X:38207943-38207943	G	intron_variant	MODIFIER	Tmem255a	ENSMUSG00000036502	Transcript	ENSMUST00000066498.7	protein_coding	-	09 of 09	ENSMUST00000066498.7:c.891+67T>C	-	-	-	-	-	-	-	-	-1	-	MGI	-	-	1	P1	CCDS30089.1	ENSMUSP00000064511	Q8BHW5	-	UPI00000262EA	-	-	-	-	-	-	-	-	-
TpB_UVA_UV564_VEP_ALL.xlsx	TpB	UVA	UV564	X:38207943-38207943	G	intron_variant	MODIFIER	Tmem255a	ENSMUSG00000036502	Transcript	ENSMUST00000089054.10	protein_coding	-	08 of 08	ENSMUST00000089054.10:c.822+67T>C	-	-	-	-	-	-	-	-	-1	-	MGI	-	-	1	-	CCDS72367.1	ENSMUSP00000086455	Q8BHW5	-	UPI000024E579	-	-	-	-	-	-	-	-	-
TpB_UVA_UV564_VEP_ALL.xlsx	TpB	UVA	UV564	X:38207943-38207943	G	intron_variant	MODIFIER	Tmem255a	ENSMUSG00000036502	Transcript	ENSMUST00000089056.9	protein_coding	-	09 of 09	ENSMUST00000089056.9:c.891+67T>C	-	-	-	-	-	-	-	-	-1	-	MGI	-	-	1	-	CCDS81122.1	ENSMUSP00000086457	Q8BHW5	-	UPI00000EB89C	-	-	-	-	-	-	-	-	-
TpB_UVA_UV564_VEP_ALL.xlsx	TpB	UVA	UV564	X:38207943-38207943	G	intron_variant,non_coding_transcript_variant	MODIFIER	Tmem255a	ENSMUSG00000036502	Transcript	ENSMUST00000155848.7	retained_intron	-	07 of 07	ENSMUST00000155848.7:n.1344+67T>C	-	-	-	-	-	-	-	-	-1	-	MGI	-	-	2	-	-	-	-	-	-	-	-	-	-	-	-	-	-	-
TpB_UVA_UV564_VEP_ALL.xlsx	TpB	UVA	UV564	X:38207943-38207943	G	upstream_gene_variant	MODIFIER	Mir3110	ENSMUSG00000092794	Transcript	ENSMUST00000175053.1	miRNA	-	-	-	-	-	-	-	-	-	-	2498	1	-	MGI	-	-	-	-	-	-	-	-	-	-	-	-	-	-	-	-	-	-
TpB_UVA_UV564_VEP_ALL.xlsx	TpB	UVA	UV564	X:74235722-74235722	T	missense_variant	MODERATE	Flna	ENSMUSG00000031328	Transcript	ENSMUST00000033699.12	protein_coding	21 of 47	-	ENSMUST00000033699.12:c.3703T>A	ENSMUSP00000033699.6:p.Tyr1235Asn	3822	3703	1235	Y/N	Tat/Aat	-	-	-1	-	MGI	-	-	5	A1	-	ENSMUSP00000033699	Q8BTM8	-	UPI00001E409A	deleterious(0)	-	-	-	-	-	-	-	-
TpB_UVA_UV564_VEP_ALL.xlsx	TpB	UVA	UV564	X:74235722-74235722	T	missense_variant	MODERATE	Flna	ENSMUSG00000031328	Transcript	ENSMUST00000101454.8	protein_coding	21 of 46	-	ENSMUST00000101454.8:c.3703T>A	ENSMUSP00000098997.2:p.Tyr1235Asn	3801	3703	1235	Y/N	Tat/Aat	-	-	-1	-	MGI	-	-	1	P2	CCDS41018.1	ENSMUSP00000098997	-	B7FAU9	UPI0000F0A5D9	deleterious(0)	-	-	-	-	-	-	-	-
TpB_UVA_UV564_VEP_ALL.xlsx	TpB	UVA	UV564	X:74235722-74235722	T	missense_variant	MODERATE	Flna	ENSMUSG00000031328	Transcript	ENSMUST00000114299.7	protein_coding	22 of 47	-	ENSMUST00000114299.7:c.3703T>A	ENSMUSP00000109938.1:p.Tyr1235Asn	3910	3703	1235	Y/N	Tat/Aat	-	-	-1	-	MGI	-	-	5	P2	CCDS41018.1	ENSMUSP00000109938	-	B7FAU9	UPI0000F0A5D9	deleterious(0)	-	-	-	-	-	-	-	-
TpB_UVA_UV564_VEP_ALL.xlsx	TpB	UVA	UV564	X:74235722-74235722	T	missense_variant	MODERATE	Flna	ENSMUSG00000031328	Transcript	ENSMUST00000130007.7	protein_coding	21 of 45	-	ENSMUST00000130007.7:c.3631T>A	ENSMUSP00000121082.1:p.Tyr1211Asn	3631	3631	1211	Y/N	Tat/Aat	-	-	-1	cds_start_NF	MGI	-	-	5	-	-	ENSMUSP00000121082	-	B7FAV1	UPI000164C33E	deleterious(0)	-	-	-	-	-	-	-	-
TpB_UVA_UV564_VEP_ALL.xlsx	TpB	UVA	UV564	X:74235722-74235722	T	non_coding_transcript_exon_variant	MODIFIER	Flna	ENSMUSG00000031328	Transcript	ENSMUST00000130203.1	processed_transcript	01 of 04	-	ENSMUST00000130203.1:n.241T>A	-	241	-	-	-	-	-	-	-1	-	MGI	-	-	5	-	-	-	-	-	-	-	-	-	-	-	-	-	-	-
TpB_UVA_UV564_VEP_ALL.xlsx	TpB	UVA	UV564	X:74235722-74235722	T	downstream_gene_variant	MODIFIER	Flna	ENSMUSG00000031328	Transcript	ENSMUST00000133288.1	processed_transcript	-	-	-	-	-	-	-	-	-	-	359	-1	-	MGI	-	-	2	-	-	-	-	-	-	-	-	-	-	-	-	-	-	-
TpB_UVA_UV564_VEP_ALL.xlsx	TpB	UVA	UV564	X:74235722-74235722	T	3_prime_UTR_variant,NMD_transcript_variant	MODIFIER	Flna	ENSMUSG00000031328	Transcript	ENSMUST00000144429.7	nonsense_mediated_decay	21 of 47	-	ENSMUST00000144429.7:c.*2129T>A	-	3663	-	-	-	-	-	-	-1	cds_start_NF	MGI	-	-	1	-	-	ENSMUSP00000123278	-	F6XC15	UPI000164C33B	-	-	-	-	-	-	-	-	-
TpB_UVA_UV564_VEP_ALL.xlsx	TpB	UVA	UV564	X:74235722-74235722	T	downstream_gene_variant	MODIFIER	Flna	ENSMUSG00000031328	Transcript	ENSMUST00000239316.1	nonsense_mediated_decay	-	-	-	-	-	-	-	-	-	-	4691	-1	cds_start_NF	MGI	-	-	-	-	-	ENSMUSP00000159282	-	-	-	-	-	-	-	-	-	-	-	-
TpB_UVA_UV564_VEP_ALL.xlsx	TpB	UVA	UV564	X:81822643-81822643	C	non_coding_transcript_exon_variant	MODIFIER	Actr3-ps	ENSMUSG00000082319	Transcript	ENSMUST00000118948.1	processed_pseudogene	01 of 01	-	ENSMUST00000118948.1:n.88A>G	-	88	-	-	-	-	-	-	-1	-	MGI	-	-	-	-	-	-	-	-	-	-	-	-	-	-	-	-	-	-
TpB_UVA_UV564_VEP_ALL.xlsx	TpB	UVA	UV564	X:81822643-81822643	C	regulatory_region_variant	MODIFIER	-	-	RegulatoryFeature	ENSMUSR00000473407	-	-	-	-	-	-	-	-	-	-	-	-	-	-	-	-	-	-	-	-	-	-	-	-	-	-	-	-	-	-	-	-	-
TpB_UVA_UV564_VEP_ALL.xlsx	TpB	UVA	UV564	X:106434198-106434198	A	intron_variant	MODIFIER	Fndc3c1	ENSMUSG00000033737	Transcript	ENSMUST00000039447.13	protein_coding	-	17 of 26	ENSMUST00000039447.13:c.2365+65C>T	-	-	-	-	-	-	-	-	-1	-	MGI	-	-	1	P1	CCDS30342.1	ENSMUSP00000038678	Q6DFV6	-	UPI00003BF2D1	-	-	-	-	-	-	-	-	-
TpB_UVA_UV564_VEP_ALL.xlsx	TpB	UVA	UV564	X:106434198-106434198	A	upstream_gene_variant	MODIFIER	Fndc3c1	ENSMUSG00000033737	Transcript	ENSMUST00000127796.7	processed_transcript	-	-	-	-	-	-	-	-	-	-	684	-1	-	MGI	-	-	3	-	-	-	-	-	-	-	-	-	-	-	-	-	-	-
TpB_UVA_UV564_VEP_ALL.xlsx	TpB	UVA	UV564	X:106434198-106434198	A	upstream_gene_variant	MODIFIER	Fndc3c1	ENSMUSG00000033737	Transcript	ENSMUST00000137507.1	retained_intron	-	-	-	-	-	-	-	-	-	-	2190	-1	-	MGI	-	-	3	-	-	-	-	-	-	-	-	-	-	-	-	-	-	-
TpB_UVA_UV564_VEP_ALL.xlsx	TpB	UVA	UV564	X:106434198-106434198	A	intron_variant,non_coding_transcript_variant	MODIFIER	Fndc3c1	ENSMUSG00000033737	Transcript	ENSMUST00000151745.1	retained_intron	-	01 of 03	ENSMUST00000151745.1:n.581+65C>T	-	-	-	-	-	-	-	-	-1	-	MGI	-	-	5	-	-	-	-	-	-	-	-	-	-	-	-	-	-	-
TpB_UVA_UV564_VEP_ALL.xlsx	TpB	UVA	UV564	X:107678689-107678689	C	upstream_gene_variant	MODIFIER	Tbx22	ENSMUSG00000031241	Transcript	ENSMUST00000068451.11	protein_coding	-	-	-	-	-	-	-	-	-	-	274	1	-	MGI	-	-	1	-	CCDS72420.1	ENSMUSP00000063611	-	Q8BKE4	UPI00000EB5AE	-	-	-	-	-	-	-	-	-
TpB_UVA_UV564_VEP_ALL.xlsx	TpB	UVA	UV564	X:107678689-107678689	C	intron_variant	MODIFIER	Tbx22	ENSMUSG00000031241	Transcript	ENSMUST00000118986.7	protein_coding	-	04 of 08	ENSMUST00000118986.7:c.449+36T>C	-	-	-	-	-	-	-	-	1	-	MGI	-	-	5	A2	CCDS30350.1	ENSMUSP00000112544	Q8K402	-	UPI00000E88C7	-	-	-	-	-	-	-	-	-
TpB_UVA_UV564_VEP_ALL.xlsx	TpB	UVA	UV564	X:107678689-107678689	C	intron_variant	MODIFIER	Tbx22	ENSMUSG00000031241	Transcript	ENSMUST00000168174.8	protein_coding	-	04 of 08	ENSMUST00000168174.8:c.491+36T>C	-	-	-	-	-	-	-	-	1	-	MGI	-	-	2	P4	CCDS30351.2	ENSMUSP00000128247	-	E9Q5R8	UPI0001BFBBE9	-	-	-	-	-	-	-	-	-
TpB_UVA_UV564_VEP_ALL.xlsx	TpB	UVA	UV564	X:107678689-107678689	C	upstream_gene_variant	MODIFIER	Tbx22	ENSMUSG00000031241	Transcript	ENSMUST00000168403.1	protein_coding	-	-	-	-	-	-	-	-	-	-	326	1	-	MGI	-	-	1	-	CCDS72420.1	ENSMUSP00000127321	-	Q8BKE4	UPI00000EB5AE	-	-	-	-	-	-	-	-	-
TpB_UVA_UV564_VEP_ALL.xlsx	TpB	UVA	UV564	X:107678689-107678689	C	intron_variant,NMD_transcript_variant	MODIFIER	Tbx22	ENSMUSG00000031241	Transcript	ENSMUST00000172682.7	nonsense_mediated_decay	-	03 of 04	ENSMUST00000172682.7:c.*70+36T>C	-	-	-	-	-	-	-	-	1	-	MGI	-	-	3	-	-	ENSMUSP00000133607	-	G3UXA1	UPI00021CF521	-	-	-	-	-	-	-	-	-
TpB_UVA_UV564_VEP_ALL.xlsx	TpB	UVA	UV564	X:112644236-112644236	A	intron_variant	MODIFIER	Pof1b	ENSMUSG00000034607	Transcript	ENSMUST00000039887.3	protein_coding	-	15 of 16	ENSMUST00000039887.3:c.1643+97C>T	-	-	-	-	-	-	-	-	-1	-	MGI	-	-	1	P1	CCDS30362.1	ENSMUSP00000047655	Q8K4L4	-	UPI00001A95E6	-	-	-	-	-	-	-	-	-
TpB_UVA_UV564_VEP_ALL.xlsx	TpB	UVA	UV564	Y:4005575-4005575	G	non_coding_transcript_exon_variant	MODIFIER	Vmn2r-ps139	ENSMUSG00000101499	Transcript	ENSMUST00000190764.1	unprocessed_pseudogene	01 of 04	-	ENSMUST00000190764.1:n.412A>G	-	412	-	-	-	-	-	-	1	-	MGI	-	-	-	-	-	-	-	-	-	-	-	-	-	-	-	-	-	-
TpB_UVA_UV564_VEP_ALL.xlsx	TpB	UVA	UV564	Y:4005578-4005578	G	non_coding_transcript_exon_variant	MODIFIER	Vmn2r-ps139	ENSMUSG00000101499	Transcript	ENSMUST00000190764.1	unprocessed_pseudogene	01 of 04	-	ENSMUST00000190764.1:n.415A>G	-	415	-	-	-	-	-	-	1	-	MGI	-	-	-	-	-	-	-	-	-	-	-	-	-	-	-	-	-	-
TpB_UVA_UV565_VEP_ALL.xlsx	TpB	UVA	UV565	1:88305182-88305182	A	upstream_gene_variant	MODIFIER	Trpm8	ENSMUSG00000036251	Transcript	ENSMUST00000040210.13	protein_coding	-	-	-	-	-	-	-	-	-	-	1577	1	-	MGI	-	-	5	P1	CCDS48316.1	ENSMUSP00000036991	Q8R4D5	-	UPI0000028546	-	-	-	-	-	-	-	-	-
TpB_UVA_UV565_VEP_ALL.xlsx	TpB	UVA	UV565	1:88305182-88305182	A	intron_variant	MODIFIER	Trpm8	ENSMUSG00000036251	Transcript	ENSMUST00000113114.9	protein_coding	-	02 of 28	ENSMUST00000113114.9:c.-229+196G>A	-	-	-	-	-	-	-	-	1	-	MGI	-	-	1	P1	CCDS48316.1	ENSMUSP00000108739	Q8R4D5	-	UPI0000028546	-	-	-	-	-	-	-	-	-
TpB_UVA_UV565_VEP_ALL.xlsx	TpB	UVA	UV565	1:88305182-88305182	A	intron_variant,non_coding_transcript_variant	MODIFIER	Trpm8	ENSMUSG00000036251	Transcript	ENSMUST00000148138.7	processed_transcript	-	03 of 05	ENSMUST00000148138.7:n.280+196G>A	-	-	-	-	-	-	-	-	1	-	MGI	-	-	2	-	-	-	-	-	-	-	-	-	-	-	-	-	-	-
TpB_UVA_UV565_VEP_ALL.xlsx	TpB	UVA	UV565	1:88305182-88305182	A	regulatory_region_variant	MODIFIER	-	-	RegulatoryFeature	ENSMUSR00000484506	-	-	-	-	-	-	-	-	-	-	-	-	-	-	-	-	-	-	-	-	-	-	-	-	-	-	-	-	-	-	-	-	-
TpB_UVA_UV565_VEP_ALL.xlsx	TpB	UVA	UV565	11:102896958-102896958	T	missense_variant	MODERATE	Gfap	ENSMUSG00000020932	Transcript	ENSMUST00000067444.9	protein_coding	01 of 09	-	ENSMUST00000067444.9:c.160G>A	ENSMUSP00000064691.3:p.Ala54Thr	174	160	54	A/T	Gcg/Acg	-	-	-1	-	MGI	-	-	1	P1	CCDS25507.1	ENSMUSP00000064691	P03995	-	UPI0000192B9B	deleterious(0.01)	-	-	-	-	-	-	-	-
TpB_UVA_UV565_VEP_ALL.xlsx	TpB	UVA	UV565	11:102896958-102896958	T	missense_variant	MODERATE	Gfap	ENSMUSG00000020932	Transcript	ENSMUST00000077902.4	protein_coding	01 of 08	-	ENSMUST00000077902.4:c.160G>A	ENSMUSP00000077061.4:p.Ala54Thr	243	160	54	A/T	Gcg/Acg	-	-	-1	-	MGI	-	-	1	-	CCDS48950.1	ENSMUSP00000077061	P03995	-	UPI0000D8B66C	deleterious(0.01)	-	-	-	-	-	-	-	-
TpB_UVA_UV565_VEP_ALL.xlsx	TpB	UVA	UV565	11:102896958-102896958	T	intron_variant,non_coding_transcript_variant	MODIFIER	Gfap	ENSMUSG00000020932	Transcript	ENSMUST00000127909.1	processed_transcript	-	01 of 03	ENSMUST00000127909.1:n.147-1148G>A	-	-	-	-	-	-	-	-	-1	-	MGI	-	-	3	-	-	-	-	-	-	-	-	-	-	-	-	-	-	-
TpB_UVA_UV565_VEP_ALL.xlsx	TpB	UVA	UV565	11:102896958-102896958	T	regulatory_region_variant	MODIFIER	-	-	RegulatoryFeature	ENSMUSR00000051196	-	-	-	-	-	-	-	-	-	-	-	-	-	-	-	-	-	-	-	-	-	-	-	-	-	-	-	-	-	-	-	-	-
TpB_UVA_UV565_VEP_ALL.xlsx	TpB	UVA	UV565	11:115446882-115446882	C	intron_variant	MODIFIER	Trim80	ENSMUSG00000070332	Transcript	ENSMUST00000093914.4	protein_coding	-	07 of 07	ENSMUST00000093914.4:c.1318+62T>C	-	-	-	-	-	-	-	-	1	-	MGI	-	-	1	P1	CCDS36372.1	ENSMUSP00000091442	-	Q3V061	UPI00005AB98C	-	-	-	-	-	-	-	-	-
TpB_UVA_UV565_VEP_ALL.xlsx	TpB	UVA	UV565	11:115446882-115446882	C	downstream_gene_variant	MODIFIER	Mir3968	ENSMUSG00000093096	Transcript	ENSMUST00000175355.1	miRNA	-	-	-	-	-	-	-	-	-	-	1079	-1	-	MGI	-	-	-	-	-	-	-	-	-	-	-	-	-	-	-	-	-	-
TpB_UVA_UV565_VEP_ALL.xlsx	TpB	UVA	UV565	11:116107073-116107073	A	intron_variant	MODIFIER	Trim47	ENSMUSG00000020773	Transcript	ENSMUST00000021120.5	protein_coding	-	04 of 05	ENSMUST00000021120.5:c.1214-67G>T	-	-	-	-	-	-	-	-	-1	-	MGI	-	-	1	P4	CCDS56823.1	ENSMUSP00000021120	Q8C0E3	-	UPI0000021A0A	-	-	-	-	-	-	-	-	-
TpB_UVA_UV565_VEP_ALL.xlsx	TpB	UVA	UV565	11:116107073-116107073	A	intron_variant	MODIFIER	Trim47	ENSMUSG00000020773	Transcript	ENSMUST00000106441.7	protein_coding	-	04 of 05	ENSMUST00000106441.7:c.1214-70G>T	-	-	-	-	-	-	-	-	-1	-	MGI	-	-	1	A2	CCDS56822.1	ENSMUSP00000102049	Q8C0E3	-	UPI00004650CB	-	-	-	-	-	-	-	-	-
TpB_UVA_UV565_VEP_ALL.xlsx	TpB	UVA	UV565	11:116107073-116107073	A	intron_variant,non_coding_transcript_variant	MODIFIER	Trim47	ENSMUSG00000020773	Transcript	ENSMUST00000127235.1	processed_transcript	-	01 of 02	ENSMUST00000127235.1:n.318-70G>T	-	-	-	-	-	-	-	-	-1	-	MGI	-	-	2	-	-	-	-	-	-	-	-	-	-	-	-	-	-	-
TpB_UVA_UV565_VEP_ALL.xlsx	TpB	UVA	UV565	11:116107073-116107073	A	downstream_gene_variant	MODIFIER	Trim47	ENSMUSG00000020773	Transcript	ENSMUST00000133039.1	processed_transcript	-	-	-	-	-	-	-	-	-	-	738	-1	-	MGI	-	-	3	-	-	-	-	-	-	-	-	-	-	-	-	-	-	-
TpB_UVA_UV565_VEP_ALL.xlsx	TpB	UVA	UV565	11:116107073-116107073	A	intron_variant,non_coding_transcript_variant	MODIFIER	Trim47	ENSMUSG00000020773	Transcript	ENSMUST00000134691.1	processed_transcript	-	02 of 03	ENSMUST00000134691.1:n.458-67G>T	-	-	-	-	-	-	-	-	-1	-	MGI	-	-	3	-	-	-	-	-	-	-	-	-	-	-	-	-	-	-
TpB_UVA_UV565_VEP_ALL.xlsx	TpB	UVA	UV565	11:116107073-116107073	A	intron_variant,non_coding_transcript_variant	MODIFIER	Trim47	ENSMUSG00000020773	Transcript	ENSMUST00000141531.7	processed_transcript	-	02 of 03	ENSMUST00000141531.7:n.542-70G>T	-	-	-	-	-	-	-	-	-1	-	MGI	-	-	1	-	-	-	-	-	-	-	-	-	-	-	-	-	-	-
TpB_UVA_UV565_VEP_ALL.xlsx	TpB	UVA	UV565	11:116107073-116107073	A	non_coding_transcript_exon_variant	MODIFIER	Trim47	ENSMUSG00000020773	Transcript	ENSMUST00000149957.1	processed_transcript	01 of 02	-	ENSMUST00000149957.1:n.11G>T	-	11	-	-	-	-	-	-	-1	-	MGI	-	-	2	-	-	-	-	-	-	-	-	-	-	-	-	-	-	-
TpB_UVA_UV565_VEP_ALL.xlsx	TpB	UVA	UV565	11:116107073-116107073	A	regulatory_region_variant	MODIFIER	-	-	RegulatoryFeature	ENSMUSR00000527422	-	-	-	-	-	-	-	-	-	-	-	-	-	-	-	-	-	-	-	-	-	-	-	-	-	-	-	-	-	-	-	-	-
TpB_UVA_UV565_VEP_ALL.xlsx	TpB	UVA	UV565	11:121605118-121605118	T	intron_variant	MODIFIER	Tbcd	ENSMUSG00000039230	Transcript	ENSMUST00000103013.9	protein_coding	-	33 of 38	ENSMUST00000103013.9:c.3123-145G>T	-	-	-	-	-	-	-	-	1	-	MGI	-	-	1	P1	CCDS25778.1	ENSMUSP00000099302	Q8BYA0	-	UPI0000029C84	-	-	-	-	-	-	-	-	-
TpB_UVA_UV565_VEP_ALL.xlsx	TpB	UVA	UV565	11:121605118-121605118	T	intron_variant,non_coding_transcript_variant	MODIFIER	Tbcd	ENSMUSG00000039230	Transcript	ENSMUST00000139414.7	processed_transcript	-	05 of 10	ENSMUST00000139414.7:n.606-145G>T	-	-	-	-	-	-	-	-	1	-	MGI	-	-	1	-	-	-	-	-	-	-	-	-	-	-	-	-	-	-
TpB_UVA_UV565_VEP_ALL.xlsx	TpB	UVA	UV565	11:121605118-121605118	T	intron_variant,non_coding_transcript_variant	MODIFIER	Tbcd	ENSMUSG00000039230	Transcript	ENSMUST00000151666.1	processed_transcript	-	05 of 10	ENSMUST00000151666.1:n.638-145G>T	-	-	-	-	-	-	-	-	1	-	MGI	-	-	1	-	-	-	-	-	-	-	-	-	-	-	-	-	-	-
TpB_UVA_UV565_VEP_ALL.xlsx	TpB	UVA	UV565	11:121605118-121605118	T	intron_variant,non_coding_transcript_variant	MODIFIER	Tbcd	ENSMUSG00000039230	Transcript	ENSMUST00000155666.7	retained_intron	-	04 of 09	ENSMUST00000155666.7:n.4146-145G>T	-	-	-	-	-	-	-	-	1	-	MGI	-	-	1	-	-	-	-	-	-	-	-	-	-	-	-	-	-	-
TpB_UVA_UV565_VEP_ALL.xlsx	TpB	UVA	UV565	13:19094930-19094930	T	intron_variant	MODIFIER	Amph	ENSMUSG00000021314	Transcript	ENSMUST00000003345.9	protein_coding	-	06 of 20	ENSMUST00000003345.9:c.504+70A>T	-	-	-	-	-	-	-	-	1	-	MGI	-	-	1	P3	CCDS26258.1	ENSMUSP00000003345	Q7TQF7	-	UPI00001B0760	-	-	-	-	-	-	-	-	-
TpB_UVA_UV565_VEP_ALL.xlsx	TpB	UVA	UV565	13:19094930-19094930	T	intron_variant,non_coding_transcript_variant	MODIFIER	Amph	ENSMUSG00000021314	Transcript	ENSMUST00000200273.1	retained_intron	-	06 of 08	ENSMUST00000200273.1:n.539+70A>T	-	-	-	-	-	-	-	-	1	-	MGI	-	-	1	-	-	-	-	-	-	-	-	-	-	-	-	-	-	-
TpB_UVA_UV565_VEP_ALL.xlsx	TpB	UVA	UV565	13:19094930-19094930	T	intron_variant	MODIFIER	Amph	ENSMUSG00000021314	Transcript	ENSMUST00000200466.4	protein_coding	-	06 of 20	ENSMUST00000200466.4:c.504+70A>T	-	-	-	-	-	-	-	-	1	-	MGI	-	-	1	A2	CCDS79165.1	ENSMUSP00000142766	-	A0A0G2JEG8	UPI0000020D03	-	-	-	-	-	-	-	-	-
TpB_UVA_UV565_VEP_ALL.xlsx	TpB	UVA	UV565	13:19094930-19094930	T	intron_variant,non_coding_transcript_variant	MODIFIER	Amph	ENSMUSG00000021314	Transcript	ENSMUST00000222698.1	processed_transcript	-	05 of 19	ENSMUST00000222698.1:n.444+70A>T	-	-	-	-	-	-	-	-	1	-	MGI	-	-	1	-	-	-	-	-	-	-	-	-	-	-	-	-	-	-
TpB_UVA_UV565_VEP_ALL.xlsx	TpB	UVA	UV565	13:19094930-19094930	T	intron_variant	MODIFIER	Amph	ENSMUSG00000021314	Transcript	ENSMUST00000239207.1	protein_coding	-	06 of 20	ENSMUST00000239207.1:c.504+70A>T	-	-	-	-	-	-	-	-	1	-	MGI	-	-	-	A2	-	ENSMUSP00000159202	-	-	-	-	-	-	-	-	-	-	-	-
TpB_UVA_UV565_VEP_ALL.xlsx	TpB	UVA	UV565	13:61567948-61567948	G	intron_variant	MODIFIER	Cts3	ENSMUSG00000074870	Transcript	ENSMUST00000054702.8	protein_coding	-	04 of 07	ENSMUST00000054702.8:c.396+107T>C	-	-	-	-	-	-	-	-	-1	-	MGI	-	-	1	P1	CCDS36695.1	ENSMUSP00000058359	-	Q91ZD5	UPI0000021BF4	-	-	-	-	-	-	-	-	-
TpB_UVA_UV565_VEP_ALL.xlsx	TpB	UVA	UV565	13:61567948-61567948	G	intron_variant	MODIFIER	Cts3	ENSMUSG00000074870	Transcript	ENSMUST00000223815.1	protein_coding	-	04 of 07	ENSMUST00000223815.1:c.396+107T>C	-	-	-	-	-	-	-	-	-1	-	MGI	-	-	-	P1	CCDS36695.1	ENSMUSP00000153399	-	Q91ZD5	UPI0000021BF4	-	-	-	-	-	-	-	-	-
TpB_UVA_UV565_VEP_ALL.xlsx	TpB	UVA	UV565	13:61567948-61567948	G	non_coding_transcript_exon_variant	MODIFIER	Cts3	ENSMUSG00000074870	Transcript	ENSMUST00000224050.1	retained_intron	03 of 03	-	ENSMUST00000224050.1:n.659T>C	-	659	-	-	-	-	-	-	-1	-	MGI	-	-	-	-	-	-	-	-	-	-	-	-	-	-	-	-	-	-
TpB_UVA_UV565_VEP_ALL.xlsx	TpB	UVA	UV565	13:61567948-61567948	G	intron_variant,NMD_transcript_variant	MODIFIER	Cts3	ENSMUSG00000074870	Transcript	ENSMUST00000224855.1	nonsense_mediated_decay	-	04 of 06	ENSMUST00000224855.1:c.396+107T>C	-	-	-	-	-	-	-	-	-1	-	MGI	-	-	-	-	-	ENSMUSP00000153683	-	A0A286YE21	UPI000BAD5AD6	-	-	-	-	-	-	-	-	-
TpB_UVA_UV565_VEP_ALL.xlsx	TpB	UVA	UV565	13:61567948-61567948	G	non_coding_transcript_exon_variant	MODIFIER	Cts3	ENSMUSG00000074870	Transcript	ENSMUST00000224967.1	retained_intron	04 of 04	-	ENSMUST00000224967.1:n.659T>C	-	659	-	-	-	-	-	-	-1	-	MGI	-	-	-	-	-	-	-	-	-	-	-	-	-	-	-	-	-	-
TpB_UVA_UV565_VEP_ALL.xlsx	TpB	UVA	UV565	13:61567948-61567948	G	upstream_gene_variant	MODIFIER	Cts3	ENSMUSG00000074870	Transcript	ENSMUST00000225515.1	retained_intron	-	-	-	-	-	-	-	-	-	-	1260	-1	-	MGI	-	-	-	-	-	-	-	-	-	-	-	-	-	-	-	-	-	-
TpB_UVA_UV565_VEP_ALL.xlsx	TpB	UVA	UV565	13:61567948-61567948	G	intron_variant	MODIFIER	Gm49352	ENSMUSG00000114904	Transcript	ENSMUST00000225902.1	protein_coding	-	01 of 02	ENSMUST00000225902.1:c.-55+107T>C	-	-	-	-	-	-	-	-	-1	cds_end_NF	MGI	-	-	-	P1	-	ENSMUSP00000152924	-	A0A286YCD0	UPI000BAD5BA7	-	-	-	-	-	-	-	-	-
TpB_UVA_UV565_VEP_ALL.xlsx	TpB	UVA	UV565	13:61780841-61780841	G	intergenic_variant	MODIFIER	-	-	-	-	-	-	-	-	-	-	-	-	-	-	-	-	-	-	-	-	-	-	-	-	-	-	-	-	-	-	-	-	-	-	-	-	-
TpB_UVA_UV565_VEP_ALL.xlsx	TpB	UVA	UV565	13:61785872-61785872	A	intergenic_variant	MODIFIER	-	-	-	-	-	-	-	-	-	-	-	-	-	-	-	-	-	-	-	-	-	-	-	-	-	-	-	-	-	-	-	-	-	-	-	-	-
TpB_UVA_UV565_VEP_ALL.xlsx	TpB	UVA	UV565	13:62145970-62145970	G	intron_variant	MODIFIER	Zfp808	ENSMUSG00000074867	Transcript	ENSMUST00000099449.3	protein_coding	-	01 of 03	ENSMUST00000099449.3:c.3+15942T>G	-	-	-	-	-	-	-	-	1	-	MGI	-	-	1	P1	CCDS36696.1	ENSMUSP00000097048	-	B8JJZ4	UPI0000606E6C	-	-	-	-	-	-	-	-	-
TpB_UVA_UV565_VEP_ALL.xlsx	TpB	UVA	UV565	13:62145970-62145970	G	intron_variant,non_coding_transcript_variant	MODIFIER	Zfp808	ENSMUSG00000074867	Transcript	ENSMUST00000221542.1	processed_transcript	-	01 of 04	ENSMUST00000221542.1:n.127+15942T>G	-	-	-	-	-	-	-	-	1	-	MGI	-	-	5	-	-	-	-	-	-	-	-	-	-	-	-	-	-	-
TpB_UVA_UV565_VEP_ALL.xlsx	TpB	UVA	UV565	13:62145970-62145970	G	intron_variant	MODIFIER	Zfp808	ENSMUSG00000074867	Transcript	ENSMUST00000221772.1	protein_coding	-	01 of 02	ENSMUST00000221772.1:c.3+15942T>G	-	-	-	-	-	-	-	-	1	-	MGI	-	-	5	-	-	ENSMUSP00000152319	-	A0A1Y7VJ92	UPI0005ABA683	-	-	-	-	-	-	-	-	-
TpB_UVA_UV565_VEP_ALL.xlsx	TpB	UVA	UV565	13:62145970-62145970	G	intron_variant,non_coding_transcript_variant	MODIFIER	Zfp808	ENSMUSG00000074867	Transcript	ENSMUST00000222809.1	processed_transcript	-	01 of 03	ENSMUST00000222809.1:n.129+15942T>G	-	-	-	-	-	-	-	-	1	-	MGI	-	-	5	-	-	-	-	-	-	-	-	-	-	-	-	-	-	-
TpB_UVA_UV565_VEP_ALL.xlsx	TpB	UVA	UV565	13:62145970-62145970	G	intron_variant,non_coding_transcript_variant	MODIFIER	Zfp808	ENSMUSG00000074867	Transcript	ENSMUST00000222947.1	processed_transcript	-	01 of 04	ENSMUST00000222947.1:n.96+15942T>G	-	-	-	-	-	-	-	-	1	-	MGI	-	-	3	-	-	-	-	-	-	-	-	-	-	-	-	-	-	-
TpB_UVA_UV565_VEP_ALL.xlsx	TpB	UVA	UV565	13:62145970-62145970	G	intron_variant,non_coding_transcript_variant	MODIFIER	Zfp808	ENSMUSG00000074867	Transcript	ENSMUST00000223094.1	processed_transcript	-	01 of 05	ENSMUST00000223094.1:n.129+15942T>G	-	-	-	-	-	-	-	-	1	-	MGI	-	-	3	-	-	-	-	-	-	-	-	-	-	-	-	-	-	-
TpB_UVA_UV565_VEP_ALL.xlsx	TpB	UVA	UV565	13:62145970-62145970	G	regulatory_region_variant	MODIFIER	-	-	RegulatoryFeature	ENSMUSR00000075642	-	-	-	-	-	-	-	-	-	-	-	-	-	-	-	-	-	-	-	-	-	-	-	-	-	-	-	-	-	-	-	-	-
TpB_UVA_UV565_VEP_ALL.xlsx	TpB	UVA	UV565	13:62146182-62146182	C	intron_variant	MODIFIER	Zfp808	ENSMUSG00000074867	Transcript	ENSMUST00000099449.3	protein_coding	-	01 of 03	ENSMUST00000099449.3:c.3+16154T>C	-	-	-	-	-	-	-	-	1	-	MGI	-	-	1	P1	CCDS36696.1	ENSMUSP00000097048	-	B8JJZ4	UPI0000606E6C	-	-	-	-	-	-	-	-	-
TpB_UVA_UV565_VEP_ALL.xlsx	TpB	UVA	UV565	13:62146182-62146182	C	intron_variant,non_coding_transcript_variant	MODIFIER	Zfp808	ENSMUSG00000074867	Transcript	ENSMUST00000221542.1	processed_transcript	-	01 of 04	ENSMUST00000221542.1:n.127+16154T>C	-	-	-	-	-	-	-	-	1	-	MGI	-	-	5	-	-	-	-	-	-	-	-	-	-	-	-	-	-	-
TpB_UVA_UV565_VEP_ALL.xlsx	TpB	UVA	UV565	13:62146182-62146182	C	intron_variant	MODIFIER	Zfp808	ENSMUSG00000074867	Transcript	ENSMUST00000221772.1	protein_coding	-	01 of 02	ENSMUST00000221772.1:c.3+16154T>C	-	-	-	-	-	-	-	-	1	-	MGI	-	-	5	-	-	ENSMUSP00000152319	-	A0A1Y7VJ92	UPI0005ABA683	-	-	-	-	-	-	-	-	-
TpB_UVA_UV565_VEP_ALL.xlsx	TpB	UVA	UV565	13:62146182-62146182	C	upstream_gene_variant	MODIFIER	Gm36501	ENSMUSG00000113690	Transcript	ENSMUST00000221857.1	processed_pseudogene	-	-	-	-	-	-	-	-	-	-	4988	1	-	MGI	-	-	-	-	-	-	-	-	-	-	-	-	-	-	-	-	-	-
TpB_UVA_UV565_VEP_ALL.xlsx	TpB	UVA	UV565	13:62146182-62146182	C	intron_variant,non_coding_transcript_variant	MODIFIER	Zfp808	ENSMUSG00000074867	Transcript	ENSMUST00000222809.1	processed_transcript	-	01 of 03	ENSMUST00000222809.1:n.129+16154T>C	-	-	-	-	-	-	-	-	1	-	MGI	-	-	5	-	-	-	-	-	-	-	-	-	-	-	-	-	-	-
TpB_UVA_UV565_VEP_ALL.xlsx	TpB	UVA	UV565	13:62146182-62146182	C	intron_variant,non_coding_transcript_variant	MODIFIER	Zfp808	ENSMUSG00000074867	Transcript	ENSMUST00000222947.1	processed_transcript	-	01 of 04	ENSMUST00000222947.1:n.96+16154T>C	-	-	-	-	-	-	-	-	1	-	MGI	-	-	3	-	-	-	-	-	-	-	-	-	-	-	-	-	-	-
TpB_UVA_UV565_VEP_ALL.xlsx	TpB	UVA	UV565	13:62146182-62146182	C	intron_variant,non_coding_transcript_variant	MODIFIER	Zfp808	ENSMUSG00000074867	Transcript	ENSMUST00000223094.1	processed_transcript	-	01 of 05	ENSMUST00000223094.1:n.129+16154T>C	-	-	-	-	-	-	-	-	1	-	MGI	-	-	3	-	-	-	-	-	-	-	-	-	-	-	-	-	-	-
TpB_UVA_UV565_VEP_ALL.xlsx	TpB	UVA	UV565	13:62146182-62146182	C	regulatory_region_variant	MODIFIER	-	-	RegulatoryFeature	ENSMUSR00000075642	-	-	-	-	-	-	-	-	-	-	-	-	-	-	-	-	-	-	-	-	-	-	-	-	-	-	-	-	-	-	-	-	-
TpB_UVA_UV565_VEP_ALL.xlsx	TpB	UVA	UV565	13:65340736-65340736	G	intron_variant,non_coding_transcript_variant	MODIFIER	Gm7762	ENSMUSG00000113406	Transcript	ENSMUST00000220595.1	lincRNA	-	02 of 03	ENSMUST00000220595.1:n.242-127T>C	-	-	-	-	-	-	-	-	-1	-	MGI	-	-	3	-	-	-	-	-	-	-	-	-	-	-	-	-	-	-
TpB_UVA_UV565_VEP_ALL.xlsx	TpB	UVA	UV565	13:65340736-65340736	G	upstream_gene_variant	MODIFIER	Gm47264	ENSMUSG00000114142	Transcript	ENSMUST00000222824.1	processed_pseudogene	-	-	-	-	-	-	-	-	-	-	4391	1	-	MGI	-	-	-	-	-	-	-	-	-	-	-	-	-	-	-	-	-	-
TpB_UVA_UV565_VEP_ALL.xlsx	TpB	UVA	UV565	13:65400223-65400223	A	upstream_gene_variant	MODIFIER	Gm21930	ENSMUSG00000113911	Transcript	ENSMUST00000220797.1	processed_pseudogene	-	-	-	-	-	-	-	-	-	-	2545	-1	-	MGI	-	-	-	-	-	-	-	-	-	-	-	-	-	-	-	-	-	-
TpB_UVA_UV565_VEP_ALL.xlsx	TpB	UVA	UV565	13:65400223-65400223	A	upstream_gene_variant	MODIFIER	Gm48111	ENSMUSG00000113388	Transcript	ENSMUST00000221482.1	processed_pseudogene	-	-	-	-	-	-	-	-	-	-	4073	1	-	MGI	-	-	-	-	-	-	-	-	-	-	-	-	-	-	-	-	-	-
TpB_UVA_UV565_VEP_ALL.xlsx	TpB	UVA	UV565	13:65400223-65400223	A	upstream_gene_variant	MODIFIER	Gm48103	ENSMUSG00000113301	Transcript	ENSMUST00000221922.1	processed_pseudogene	-	-	-	-	-	-	-	-	-	-	4085	-1	-	MGI	-	-	-	-	-	-	-	-	-	-	-	-	-	-	-	-	-	-
TpB_UVA_UV565_VEP_ALL.xlsx	TpB	UVA	UV565	13:65415121-65415121	T	upstream_gene_variant	MODIFIER	Cbx3-ps5	ENSMUSG00000113207	Transcript	ENSMUST00000091545.2	processed_pseudogene	-	-	-	-	-	-	-	-	-	-	1480	1	-	MGI	-	-	-	-	-	-	-	-	-	-	-	-	-	-	-	-	-	-
TpB_UVA_UV565_VEP_ALL.xlsx	TpB	UVA	UV565	13:65549822-65549822	T	intron_variant,non_coding_transcript_variant	MODIFIER	Gm48166	ENSMUSG00000113618	Transcript	ENSMUST00000222230.1	lincRNA	-	01 of 01	ENSMUST00000222230.1:n.997+55336C>T	-	-	-	-	-	-	-	-	1	-	MGI	-	-	5	-	-	-	-	-	-	-	-	-	-	-	-	-	-	-
TpB_UVA_UV565_VEP_ALL.xlsx	TpB	UVA	UV565	13:65549822-65549822	T	intron_variant,non_coding_transcript_variant	MODIFIER	Gm48165	ENSMUSG00000113468	Transcript	ENSMUST00000223034.1	processed_transcript	-	01 of 01	ENSMUST00000223034.1:n.689+61695C>T	-	-	-	-	-	-	-	-	1	-	MGI	-	-	5	-	-	-	-	-	-	-	-	-	-	-	-	-	-	-
TpB_UVA_UV565_VEP_ALL.xlsx	TpB	UVA	UV565	13:65564194-65564194	T	downstream_gene_variant	MODIFIER	Cbx3-ps2	ENSMUSG00000113565	Transcript	ENSMUST00000099421.3	processed_pseudogene	-	-	-	-	-	-	-	-	-	-	4483	1	-	MGI	-	-	-	-	-	-	-	-	-	-	-	-	-	-	-	-	-	-
TpB_UVA_UV565_VEP_ALL.xlsx	TpB	UVA	UV565	13:65564194-65564194	T	intron_variant,non_coding_transcript_variant	MODIFIER	Gm48166	ENSMUSG00000113618	Transcript	ENSMUST00000222230.1	lincRNA	-	01 of 01	ENSMUST00000222230.1:n.998-65918G>T	-	-	-	-	-	-	-	-	1	-	MGI	-	-	5	-	-	-	-	-	-	-	-	-	-	-	-	-	-	-
TpB_UVA_UV565_VEP_ALL.xlsx	TpB	UVA	UV565	13:65564194-65564194	T	downstream_gene_variant	MODIFIER	Vmn2r-ps97	ENSMUSG00000113381	Transcript	ENSMUST00000222427.2	unprocessed_pseudogene	-	-	-	-	-	-	-	-	-	-	12	-1	-	MGI	-	-	-	-	-	-	-	-	-	-	-	-	-	-	-	-	-	-
TpB_UVA_UV565_VEP_ALL.xlsx	TpB	UVA	UV565	13:65564194-65564194	T	intron_variant,non_coding_transcript_variant	MODIFIER	Gm48165	ENSMUSG00000113468	Transcript	ENSMUST00000223034.1	processed_transcript	-	01 of 01	ENSMUST00000223034.1:n.690-59534G>T	-	-	-	-	-	-	-	-	1	-	MGI	-	-	5	-	-	-	-	-	-	-	-	-	-	-	-	-	-	-
TpB_UVA_UV565_VEP_ALL.xlsx	TpB	UVA	UV565	13:65692938-65692938	G	non_coding_transcript_exon_variant	MODIFIER	Gm19428	ENSMUSG00000113260	Transcript	ENSMUST00000220512.1	transcribed_processed_pseudogene	01 of 03	-	ENSMUST00000220512.1:n.59G>C	-	59	-	-	-	-	-	-	-1	-	MGI	-	-	-	-	-	-	-	-	-	-	-	-	-	-	-	-	-	-
TpB_UVA_UV565_VEP_ALL.xlsx	TpB	UVA	UV565	13:65692938-65692938	G	intron_variant,non_coding_transcript_variant	MODIFIER	Gm19428	ENSMUSG00000113260	Transcript	ENSMUST00000220573.1	processed_transcript	-	04 of 05	ENSMUST00000220573.1:n.656-9G>C	-	-	-	-	-	-	-	-	-1	-	MGI	-	-	5	-	-	-	-	-	-	-	-	-	-	-	-	-	-	-
TpB_UVA_UV565_VEP_ALL.xlsx	TpB	UVA	UV565	13:65692938-65692938	G	upstream_gene_variant	MODIFIER	Gm19118	ENSMUSG00000113513	Transcript	ENSMUST00000222554.1	unprocessed_pseudogene	-	-	-	-	-	-	-	-	-	-	4125	1	-	MGI	-	-	-	-	-	-	-	-	-	-	-	-	-	-	-	-	-	-
TpB_UVA_UV565_VEP_ALL.xlsx	TpB	UVA	UV565	13:65692944-65692944	G	non_coding_transcript_exon_variant	MODIFIER	Gm19428	ENSMUSG00000113260	Transcript	ENSMUST00000220512.1	transcribed_processed_pseudogene	01 of 03	-	ENSMUST00000220512.1:n.53A>C	-	53	-	-	-	-	-	-	-1	-	MGI	-	-	-	-	-	-	-	-	-	-	-	-	-	-	-	-	-	-
TpB_UVA_UV565_VEP_ALL.xlsx	TpB	UVA	UV565	13:65692944-65692944	G	intron_variant,non_coding_transcript_variant	MODIFIER	Gm19428	ENSMUSG00000113260	Transcript	ENSMUST00000220573.1	processed_transcript	-	04 of 05	ENSMUST00000220573.1:n.656-15A>C	-	-	-	-	-	-	-	-	-1	-	MGI	-	-	5	-	-	-	-	-	-	-	-	-	-	-	-	-	-	-
TpB_UVA_UV565_VEP_ALL.xlsx	TpB	UVA	UV565	13:65692944-65692944	G	upstream_gene_variant	MODIFIER	Gm19118	ENSMUSG00000113513	Transcript	ENSMUST00000222554.1	unprocessed_pseudogene	-	-	-	-	-	-	-	-	-	-	4119	1	-	MGI	-	-	-	-	-	-	-	-	-	-	-	-	-	-	-	-	-	-
TpB_UVA_UV565_VEP_ALL.xlsx	TpB	UVA	UV565	13:65732669-65732669	C	non_coding_transcript_exon_variant	MODIFIER	Vmn2r-ps98	ENSMUSG00000117836	Transcript	ENSMUST00000224983.2	unprocessed_pseudogene	02 of 05	-	ENSMUST00000224983.2:n.663A>G	-	663	-	-	-	-	-	-	-1	-	MGI	-	-	-	-	-	-	-	-	-	-	-	-	-	-	-	-	-	-
TpB_UVA_UV565_VEP_ALL.xlsx	TpB	UVA	UV565	13:65886239-65886239	C	non_coding_transcript_exon_variant	MODIFIER	Vmn2r-ps99	ENSMUSG00000113945	Transcript	ENSMUST00000221276.1	processed_transcript	04 of 04	-	ENSMUST00000221276.1:n.1052A>C	-	1052	-	-	-	-	-	-	1	-	MGI	-	-	5	-	-	-	-	-	-	-	-	-	-	-	-	-	-	-
TpB_UVA_UV565_VEP_ALL.xlsx	TpB	UVA	UV565	13:65886239-65886239	C	non_coding_transcript_exon_variant	MODIFIER	Vmn2r-ps99	ENSMUSG00000113945	Transcript	ENSMUST00000223517.1	transcribed_unprocessed_pseudogene	03 of 05	-	ENSMUST00000223517.1:n.1092A>C	-	1092	-	-	-	-	-	-	1	-	MGI	-	-	-	-	-	-	-	-	-	-	-	-	-	-	-	-	-	-
TpB_UVA_UV565_VEP_ALL.xlsx	TpB	UVA	UV565	13:65904163-65904163	T	upstream_gene_variant	MODIFIER	Gm48218	ENSMUSG00000114625	Transcript	ENSMUST00000225676.1	processed_pseudogene	-	-	-	-	-	-	-	-	-	-	4060	1	-	MGI	-	-	-	-	-	-	-	-	-	-	-	-	-	-	-	-	-	-
TpB_UVA_UV565_VEP_ALL.xlsx	TpB	UVA	UV565	13:65904304-65904304	A	upstream_gene_variant	MODIFIER	Gm48218	ENSMUSG00000114625	Transcript	ENSMUST00000225676.1	processed_pseudogene	-	-	-	-	-	-	-	-	-	-	3919	1	-	MGI	-	-	-	-	-	-	-	-	-	-	-	-	-	-	-	-	-	-
TpB_UVA_UV565_VEP_ALL.xlsx	TpB	UVA	UV565	13:65945942-65945942	G	non_coding_transcript_exon_variant	MODIFIER	Vmn2r-ps100	ENSMUSG00000113723	Transcript	ENSMUST00000221238.2	unprocessed_pseudogene	02 of 04	-	ENSMUST00000221238.2:n.498T>G	-	498	-	-	-	-	-	-	1	-	MGI	-	-	-	-	-	-	-	-	-	-	-	-	-	-	-	-	-	-
TpB_UVA_UV565_VEP_ALL.xlsx	TpB	UVA	UV565	13:65948475-65948475	G	non_coding_transcript_exon_variant	MODIFIER	Vmn2r-ps100	ENSMUSG00000113723	Transcript	ENSMUST00000221238.2	unprocessed_pseudogene	04 of 04	-	ENSMUST00000221238.2:n.795C>G	-	795	-	-	-	-	-	-	1	-	MGI	-	-	-	-	-	-	-	-	-	-	-	-	-	-	-	-	-	-
TpB_UVA_UV565_VEP_ALL.xlsx	TpB	UVA	UV565	13:65950739-65950739	A	downstream_gene_variant	MODIFIER	Vmn2r-ps100	ENSMUSG00000113723	Transcript	ENSMUST00000221238.2	unprocessed_pseudogene	-	-	-	-	-	-	-	-	-	-	2157	1	-	MGI	-	-	-	-	-	-	-	-	-	-	-	-	-	-	-	-	-	-
TpB_UVA_UV565_VEP_ALL.xlsx	TpB	UVA	UV565	13:65956032-65956032	G	intergenic_variant	MODIFIER	-	-	-	-	-	-	-	-	-	-	-	-	-	-	-	-	-	-	-	-	-	-	-	-	-	-	-	-	-	-	-	-	-	-	-	-	-
TpB_UVA_UV565_VEP_ALL.xlsx	TpB	UVA	UV565	13:66119588-66119588	A	intron_variant	MODIFIER	Gm10324	ENSMUSG00000095909	Transcript	ENSMUST00000092528.5	protein_coding	-	01 of 03	ENSMUST00000092528.5:c.3+39T>A	-	-	-	-	-	-	-	-	1	-	MGI	-	-	5	P1	-	ENSMUSP00000090190	-	L7N208	UPI0001D16928	-	-	-	-	-	-	-	-	-
TpB_UVA_UV565_VEP_ALL.xlsx	TpB	UVA	UV565	13:66119588-66119588	A	intron_variant	MODIFIER	Gm10324	ENSMUSG00000095909	Transcript	ENSMUST00000238355.1	protein_coding	-	01 of 02	ENSMUST00000238355.1:c.4-49T>A	-	-	-	-	-	-	-	-	1	-	MGI	-	-	-	-	-	ENSMUSP00000158641	-	A0A571BE92	UPI00114B4070	-	-	-	-	-	-	-	-	-
TpB_UVA_UV565_VEP_ALL.xlsx	TpB	UVA	UV565	13:66119588-66119588	A	intron_variant	MODIFIER	Gm10324	ENSMUSG00000095909	Transcript	ENSMUST00000238623.1	protein_coding	-	01 of 03	ENSMUST00000238623.1:c.4-49T>A	-	-	-	-	-	-	-	-	1	cds_end_NF	MGI	-	-	-	-	-	ENSMUSP00000158820	-	A0A571BGF1	UPI00114868E2	-	-	-	-	-	-	-	-	-
TpB_UVA_UV565_VEP_ALL.xlsx	TpB	UVA	UV565	13:66119588-66119588	A	intron_variant,non_coding_transcript_variant	MODIFIER	Gm50489	ENSMUSG00000118427	Transcript	ENSMUST00000238686.1	lincRNA	-	02 of 02	ENSMUST00000238686.1:n.207-105A>T	-	-	-	-	-	-	-	-	-1	-	MGI	-	-	-	-	-	-	-	-	-	-	-	-	-	-	-	-	-	-
TpB_UVA_UV565_VEP_ALL.xlsx	TpB	UVA	UV565	13:66210564-66210564	G	intergenic_variant	MODIFIER	-	-	-	-	-	-	-	-	-	-	-	-	-	-	-	-	-	-	-	-	-	-	-	-	-	-	-	-	-	-	-	-	-	-	-	-	-
TpB_UVA_UV565_VEP_ALL.xlsx	TpB	UVA	UV565	13:66210613-66210613	T	intergenic_variant	MODIFIER	-	-	-	-	-	-	-	-	-	-	-	-	-	-	-	-	-	-	-	-	-	-	-	-	-	-	-	-	-	-	-	-	-	-	-	-	-
TpB_UVA_UV565_VEP_ALL.xlsx	TpB	UVA	UV565	13:66236441-66236441	C	upstream_gene_variant	MODIFIER	Gm48241	ENSMUSG00000113253	Transcript	ENSMUST00000222795.1	processed_pseudogene	-	-	-	-	-	-	-	-	-	-	4336	1	-	MGI	-	-	-	-	-	-	-	-	-	-	-	-	-	-	-	-	-	-
TpB_UVA_UV565_VEP_ALL.xlsx	TpB	UVA	UV565	13:66342841-66342841	C	non_coding_transcript_exon_variant	MODIFIER	C330022B21Rik	ENSMUSG00000114729	Transcript	ENSMUST00000224620.1	processed_pseudogene	01 of 01	-	ENSMUST00000224620.1:n.95T>G	-	95	-	-	-	-	-	-	-1	-	MGI	-	-	-	-	-	-	-	-	-	-	-	-	-	-	-	-	-	-
TpB_UVA_UV565_VEP_ALL.xlsx	TpB	UVA	UV565	13:66342841-66342841	C	intron_variant,non_coding_transcript_variant	MODIFIER	Gm26754	ENSMUSG00000114616	Transcript	ENSMUST00000225647.1	lincRNA	-	02 of 02	ENSMUST00000225647.1:n.319+42295A>C	-	-	-	-	-	-	-	-	1	-	MGI	-	-	-	-	-	-	-	-	-	-	-	-	-	-	-	-	-	-
TpB_UVA_UV565_VEP_ALL.xlsx	TpB	UVA	UV565	13:66342844-66342844	G	non_coding_transcript_exon_variant	MODIFIER	C330022B21Rik	ENSMUSG00000114729	Transcript	ENSMUST00000224620.1	processed_pseudogene	01 of 01	-	ENSMUST00000224620.1:n.92T>C	-	92	-	-	-	-	-	-	-1	-	MGI	-	-	-	-	-	-	-	-	-	-	-	-	-	-	-	-	-	-
TpB_UVA_UV565_VEP_ALL.xlsx	TpB	UVA	UV565	13:66342844-66342844	G	intron_variant,non_coding_transcript_variant	MODIFIER	Gm26754	ENSMUSG00000114616	Transcript	ENSMUST00000225647.1	lincRNA	-	02 of 02	ENSMUST00000225647.1:n.319+42298A>G	-	-	-	-	-	-	-	-	1	-	MGI	-	-	-	-	-	-	-	-	-	-	-	-	-	-	-	-	-	-
TpB_UVA_UV565_VEP_ALL.xlsx	TpB	UVA	UV565	13:66343195-66343195	G	upstream_gene_variant	MODIFIER	C330022B21Rik	ENSMUSG00000114729	Transcript	ENSMUST00000224620.1	processed_pseudogene	-	-	-	-	-	-	-	-	-	-	260	-1	-	MGI	-	-	-	-	-	-	-	-	-	-	-	-	-	-	-	-	-	-
TpB_UVA_UV565_VEP_ALL.xlsx	TpB	UVA	UV565	13:66343195-66343195	G	intron_variant,non_coding_transcript_variant	MODIFIER	Gm26754	ENSMUSG00000114616	Transcript	ENSMUST00000225647.1	lincRNA	-	02 of 02	ENSMUST00000225647.1:n.319+42649A>G	-	-	-	-	-	-	-	-	1	-	MGI	-	-	-	-	-	-	-	-	-	-	-	-	-	-	-	-	-	-
TpB_UVA_UV565_VEP_ALL.xlsx	TpB	UVA	UV565	13:66351494-66351494	T	intron_variant,non_coding_transcript_variant	MODIFIER	Vmn2r-ps104	ENSMUSG00000094499	Transcript	ENSMUST00000099416.4	transcribed_unprocessed_pseudogene	-	04 of 04	ENSMUST00000099416.4:n.1426-95T>A	-	-	-	-	-	-	-	-	-1	-	MGI	-	-	5	-	-	-	-	-	-	-	-	-	-	-	-	-	-	-
TpB_UVA_UV565_VEP_ALL.xlsx	TpB	UVA	UV565	13:66351494-66351494	T	intron_variant,non_coding_transcript_variant	MODIFIER	Gm26754	ENSMUSG00000114616	Transcript	ENSMUST00000225647.1	lincRNA	-	02 of 02	ENSMUST00000225647.1:n.319+50948A>T	-	-	-	-	-	-	-	-	1	-	MGI	-	-	-	-	-	-	-	-	-	-	-	-	-	-	-	-	-	-
TpB_UVA_UV565_VEP_ALL.xlsx	TpB	UVA	UV565	13:66351494-66351494	T	non_coding_transcript_exon_variant	MODIFIER	Vmn2r-ps104	ENSMUSG00000094499	Transcript	ENSMUST00000234850.1	processed_transcript	10 of 10	-	ENSMUST00000234850.1:n.2454T>A	-	2454	-	-	-	-	-	-	-1	-	MGI	-	-	-	-	-	-	-	-	-	-	-	-	-	-	-	-	-	-
TpB_UVA_UV565_VEP_ALL.xlsx	TpB	UVA	UV565	13:66488296-66488296	T	upstream_gene_variant	MODIFIER	Gm48323	ENSMUSG00000114406	Transcript	ENSMUST00000224488.1	processed_pseudogene	-	-	-	-	-	-	-	-	-	-	2651	1	-	MGI	-	-	-	-	-	-	-	-	-	-	-	-	-	-	-	-	-	-
TpB_UVA_UV565_VEP_ALL.xlsx	TpB	UVA	UV565	13:66589342-66589342	C	upstream_gene_variant	MODIFIER	Gm27501	ENSMUSG00000098452	Transcript	ENSMUST00000183599.1	miRNA	-	-	-	-	-	-	-	-	-	-	2426	-1	-	MGI	-	-	-	-	-	-	-	-	-	-	-	-	-	-	-	-	-	-
TpB_UVA_UV565_VEP_ALL.xlsx	TpB	UVA	UV565	13:66589342-66589342	C	downstream_gene_variant	MODIFIER	Gm49532	ENSMUSG00000114262	Transcript	ENSMUST00000225932.1	processed_pseudogene	-	-	-	-	-	-	-	-	-	-	2571	-1	-	MGI	-	-	-	-	-	-	-	-	-	-	-	-	-	-	-	-	-	-
TpB_UVA_UV565_VEP_ALL.xlsx	TpB	UVA	UV565	13:66625952-66625952	G	upstream_gene_variant	MODIFIER	Gm48361	ENSMUSG00000114814	Transcript	ENSMUST00000223830.1	processed_pseudogene	-	-	-	-	-	-	-	-	-	-	3047	-1	-	MGI	-	-	-	-	-	-	-	-	-	-	-	-	-	-	-	-	-	-
TpB_UVA_UV565_VEP_ALL.xlsx	TpB	UVA	UV565	13:66680538-66680538	T	intron_variant,non_coding_transcript_variant	MODIFIER	Zfp640	ENSMUSG00000074830	Transcript	ENSMUST00000071320.5	processed_transcript	-	01 of 03	ENSMUST00000071320.5:n.87-7208G>A	-	-	-	-	-	-	-	-	-1	-	MGI	-	-	5	-	-	-	-	-	-	-	-	-	-	-	-	-	-	-
TpB_UVA_UV565_VEP_ALL.xlsx	TpB	UVA	UV565	13:66680538-66680538	T	downstream_gene_variant	MODIFIER	Vmn2r-ps106	ENSMUSG00000114549	Transcript	ENSMUST00000224860.1	unprocessed_pseudogene	-	-	-	-	-	-	-	-	-	-	2301	-1	-	MGI	-	-	-	-	-	-	-	-	-	-	-	-	-	-	-	-	-	-
TpB_UVA_UV565_VEP_ALL.xlsx	TpB	UVA	UV565	13:66680538-66680538	T	upstream_gene_variant	MODIFIER	Gm40988	ENSMUSG00000114327	Transcript	ENSMUST00000225998.1	lincRNA	-	-	-	-	-	-	-	-	-	-	416	1	-	MGI	-	-	-	-	-	-	-	-	-	-	-	-	-	-	-	-	-	-
TpB_UVA_UV565_VEP_ALL.xlsx	TpB	UVA	UV565	13:66680544-66680544	G	intron_variant,non_coding_transcript_variant	MODIFIER	Zfp640	ENSMUSG00000074830	Transcript	ENSMUST00000071320.5	processed_transcript	-	01 of 03	ENSMUST00000071320.5:n.87-7214G>C	-	-	-	-	-	-	-	-	-1	-	MGI	-	-	5	-	-	-	-	-	-	-	-	-	-	-	-	-	-	-
TpB_UVA_UV565_VEP_ALL.xlsx	TpB	UVA	UV565	13:66680544-66680544	G	downstream_gene_variant	MODIFIER	Vmn2r-ps106	ENSMUSG00000114549	Transcript	ENSMUST00000224860.1	unprocessed_pseudogene	-	-	-	-	-	-	-	-	-	-	2295	-1	-	MGI	-	-	-	-	-	-	-	-	-	-	-	-	-	-	-	-	-	-
TpB_UVA_UV565_VEP_ALL.xlsx	TpB	UVA	UV565	13:66680544-66680544	G	upstream_gene_variant	MODIFIER	Gm40988	ENSMUSG00000114327	Transcript	ENSMUST00000225998.1	lincRNA	-	-	-	-	-	-	-	-	-	-	410	1	-	MGI	-	-	-	-	-	-	-	-	-	-	-	-	-	-	-	-	-	-
TpB_UVA_UV565_VEP_ALL.xlsx	TpB	UVA	UV565	13:66680806-66680806	A	intron_variant,non_coding_transcript_variant	MODIFIER	Zfp640	ENSMUSG00000074830	Transcript	ENSMUST00000071320.5	processed_transcript	-	01 of 03	ENSMUST00000071320.5:n.87-7476C>T	-	-	-	-	-	-	-	-	-1	-	MGI	-	-	5	-	-	-	-	-	-	-	-	-	-	-	-	-	-	-
TpB_UVA_UV565_VEP_ALL.xlsx	TpB	UVA	UV565	13:66680806-66680806	A	downstream_gene_variant	MODIFIER	Vmn2r-ps106	ENSMUSG00000114549	Transcript	ENSMUST00000224860.1	unprocessed_pseudogene	-	-	-	-	-	-	-	-	-	-	2033	-1	-	MGI	-	-	-	-	-	-	-	-	-	-	-	-	-	-	-	-	-	-
TpB_UVA_UV565_VEP_ALL.xlsx	TpB	UVA	UV565	13:66680806-66680806	A	upstream_gene_variant	MODIFIER	Gm40988	ENSMUSG00000114327	Transcript	ENSMUST00000225998.1	lincRNA	-	-	-	-	-	-	-	-	-	-	148	1	-	MGI	-	-	-	-	-	-	-	-	-	-	-	-	-	-	-	-	-	-
TpB_UVA_UV565_VEP_ALL.xlsx	TpB	UVA	UV565	13:66795008-66795008	C	upstream_gene_variant	MODIFIER	Gm48413	ENSMUSG00000114314	Transcript	ENSMUST00000224105.1	processed_pseudogene	-	-	-	-	-	-	-	-	-	-	4289	1	-	MGI	-	-	-	-	-	-	-	-	-	-	-	-	-	-	-	-	-	-
TpB_UVA_UV565_VEP_ALL.xlsx	TpB	UVA	UV565	13:66795008-66795008	C	non_coding_transcript_exon_variant	MODIFIER	Gm7896	ENSMUSG00000114353	Transcript	ENSMUST00000224253.1	transcribed_processed_pseudogene	01 of 03	-	ENSMUST00000224253.1:n.17T>G	-	17	-	-	-	-	-	-	-1	-	MGI	-	-	-	-	-	-	-	-	-	-	-	-	-	-	-	-	-	-
TpB_UVA_UV565_VEP_ALL.xlsx	TpB	UVA	UV565	13:66795008-66795008	C	non_coding_transcript_exon_variant	MODIFIER	Gm7896	ENSMUSG00000114353	Transcript	ENSMUST00000224917.1	processed_transcript	02 of 04	-	ENSMUST00000224917.1:n.114T>G	-	114	-	-	-	-	-	-	-1	-	MGI	-	-	-	-	-	-	-	-	-	-	-	-	-	-	-	-	-	-
TpB_UVA_UV565_VEP_ALL.xlsx	TpB	UVA	UV565	13:66852521-66852521	A	non_coding_transcript_exon_variant	MODIFIER	Gm10323	ENSMUSG00000114816	Transcript	ENSMUST00000224898.1	processed_pseudogene	03 of 03	-	ENSMUST00000224898.1:n.546G>T	-	546	-	-	-	-	-	-	-1	-	MGI	-	-	-	-	-	-	-	-	-	-	-	-	-	-	-	-	-	-
TpB_UVA_UV565_VEP_ALL.xlsx	TpB	UVA	UV565	13:67167835-67167835	A	non_coding_transcript_exon_variant	MODIFIER	Gm48733	ENSMUSG00000114677	Transcript	ENSMUST00000225091.1	transcribed_processed_pseudogene	01 of 02	-	ENSMUST00000225091.1:n.25G>A	-	25	-	-	-	-	-	-	1	-	MGI	-	-	-	-	-	-	-	-	-	-	-	-	-	-	-	-	-	-
TpB_UVA_UV565_VEP_ALL.xlsx	TpB	UVA	UV565	13:67167835-67167835	A	non_coding_transcript_exon_variant	MODIFIER	Gm48733	ENSMUSG00000114677	Transcript	ENSMUST00000225399.1	processed_transcript	01 of 02	-	ENSMUST00000225399.1:n.55G>A	-	55	-	-	-	-	-	-	1	-	MGI	-	-	-	-	-	-	-	-	-	-	-	-	-	-	-	-	-	-
TpB_UVA_UV565_VEP_ALL.xlsx	TpB	UVA	UV565	13:67167835-67167835	A	regulatory_region_variant	MODIFIER	-	-	RegulatoryFeature	ENSMUSR00000549607	-	-	-	-	-	-	-	-	-	-	-	-	-	-	-	-	-	-	-	-	-	-	-	-	-	-	-	-	-	-	-	-	-
TpB_UVA_UV565_VEP_ALL.xlsx	TpB	UVA	UV565	13:67181957-67181957	T	synonymous_variant	LOW	Rsl1	ENSMUSG00000058900	Transcript	ENSMUST00000021997.7	protein_coding	04 of 04	-	ENSMUST00000021997.7:c.468C>T	ENSMUSP00000021997.6:p.Phe156%3D	504	468	156	F	ttC/ttT	-	-	1	-	MGI	-	-	1	P1	CCDS26613.1	ENSMUSP00000021997	-	Q7M6Y1	UPI000021CAA2	-	-	-	-	-	-	-	-	-
TpB_UVA_UV565_VEP_ALL.xlsx	TpB	UVA	UV565	13:67181957-67181957	T	downstream_gene_variant	MODIFIER	Rsl1	ENSMUSG00000058900	Transcript	ENSMUST00000225334.1	nonsense_mediated_decay	-	-	-	-	-	-	-	-	-	-	145	1	-	MGI	-	-	-	-	-	ENSMUSP00000153578	-	A0A286YDU4	UPI000BAD5A12	-	-	-	-	-	-	-	-	-
TpB_UVA_UV565_VEP_ALL.xlsx	TpB	UVA	UV565	13:67621010-67621010	T	missense_variant	MODERATE	Zfp729a	ENSMUSG00000021510	Transcript	ENSMUST00000012314.9	protein_coding	04 of 04	-	ENSMUST00000012314.9:c.1099G>A	ENSMUSP00000012314.7:p.Gly367Arg	1208	1099	367	G/R	Gga/Aga	-	-	-1	-	MGI	-	-	1	P1	CCDS26617.1	ENSMUSP00000012314	-	Q4QQP3	UPI000052F223	tolerated(0.06)	-	-	-	-	-	-	-	-
TpB_UVA_UV565_VEP_ALL.xlsx	TpB	UVA	UV565	13:67621010-67621010	T	upstream_gene_variant	MODIFIER	Zfp729a	ENSMUSG00000021510	Transcript	ENSMUST00000224548.1	processed_transcript	-	-	-	-	-	-	-	-	-	-	2157	-1	-	MGI	-	-	-	-	-	-	-	-	-	-	-	-	-	-	-	-	-	-
TpB_UVA_UV565_VEP_ALL.xlsx	TpB	UVA	UV565	13:67621010-67621010	T	intron_variant	MODIFIER	Gm49345	ENSMUSG00000114923	Transcript	ENSMUST00000224814.1	protein_coding	-	01 of 03	ENSMUST00000224814.1:c.36+16637G>A	-	-	-	-	-	-	-	-	-1	cds_end_NF	MGI	-	-	-	P5	-	ENSMUSP00000153476	-	A0A286YDM2	UPI000BAD5BBB	-	-	-	-	-	-	-	-	-
TpB_UVA_UV565_VEP_ALL.xlsx	TpB	UVA	UV565	13:67621010-67621010	T	upstream_gene_variant	MODIFIER	Zfp729a	ENSMUSG00000021510	Transcript	ENSMUST00000225511.1	processed_transcript	-	-	-	-	-	-	-	-	-	-	2626	-1	-	MGI	-	-	-	-	-	-	-	-	-	-	-	-	-	-	-	-	-	-
TpB_UVA_UV565_VEP_ALL.xlsx	TpB	UVA	UV565	13:67621010-67621010	T	downstream_gene_variant	MODIFIER	Zfp729a	ENSMUSG00000021510	Transcript	ENSMUST00000225608.1	processed_transcript	-	-	-	-	-	-	-	-	-	-	648	-1	-	MGI	-	-	-	-	-	-	-	-	-	-	-	-	-	-	-	-	-	-
TpB_UVA_UV565_VEP_ALL.xlsx	TpB	UVA	UV565	13:67621010-67621010	T	intron_variant	MODIFIER	Gm49345	ENSMUSG00000114923	Transcript	ENSMUST00000225627.1	protein_coding	-	01 of 03	ENSMUST00000225627.1:c.36+16637G>A	-	-	-	-	-	-	-	-	-1	cds_end_NF	MGI	-	-	-	A2	-	ENSMUSP00000153696	-	A0A286YE34	UPI000BAD5A83	-	-	-	-	-	-	-	-	-
TpB_UVA_UV565_VEP_ALL.xlsx	TpB	UVA	UV565	13:67751630-67751630	G	intron_variant,non_coding_transcript_variant	MODIFIER	Zfp85os	ENSMUSG00000044081	Transcript	ENSMUST00000049518.4	antisense	-	01 of 02	ENSMUST00000049518.4:n.124-1324T>G	-	-	-	-	-	-	-	-	1	-	MGI	-	-	1	-	-	-	-	-	-	-	-	-	-	-	-	-	-	-
TpB_UVA_UV565_VEP_ALL.xlsx	TpB	UVA	UV565	13:67751630-67751630	G	3_prime_UTR_variant,NMD_transcript_variant	MODIFIER	Zfp85	ENSMUSG00000058331	Transcript	ENSMUST00000091520.13	nonsense_mediated_decay	03 of 04	-	ENSMUST00000091520.13:c.*109A>C	-	334	-	-	-	-	-	-	-1	-	MGI	-	-	2	-	-	ENSMUSP00000089105	-	F7A6M1	UPI000B3D7D9B	-	-	-	-	-	-	-	-	-
TpB_UVA_UV565_VEP_ALL.xlsx	TpB	UVA	UV565	13:67751630-67751630	G	intron_variant,non_coding_transcript_variant	MODIFIER	Zfp85os	ENSMUSG00000044081	Transcript	ENSMUST00000143812.1	antisense	-	01 of 02	ENSMUST00000143812.1:n.442-1358T>G	-	-	-	-	-	-	-	-	1	-	MGI	-	-	1	-	-	-	-	-	-	-	-	-	-	-	-	-	-	-
TpB_UVA_UV565_VEP_ALL.xlsx	TpB	UVA	UV565	13:67751630-67751630	G	missense_variant	MODERATE	Zfp85	ENSMUSG00000058331	Transcript	ENSMUST00000144183.2	protein_coding	03 of 04	-	ENSMUST00000144183.2:c.209A>C	ENSMUSP00000121202.2:p.Glu70Ala	369	209	70	E/A	gAa/gCa	-	-	-1	-	MGI	-	-	1	P1	CCDS36717.1	ENSMUSP00000121202	-	Q7TMC9	UPI00001B4B0D	tolerated(0.51)	-	-	-	-	-	-	-	-
TpB_UVA_UV565_VEP_ALL.xlsx	TpB	UVA	UV565	13:67751630-67751630	G	upstream_gene_variant	MODIFIER	Zfp85os	ENSMUSG00000044081	Transcript	ENSMUST00000181158.1	retained_intron	-	-	-	-	-	-	-	-	-	-	645	1	-	MGI	-	-	-	-	-	-	-	-	-	-	-	-	-	-	-	-	-	-
TpB_UVA_UV565_VEP_ALL.xlsx	TpB	UVA	UV565	13:67822381-67822381	T	intron_variant	MODIFIER	Zfp273	ENSMUSG00000030446	Transcript	ENSMUST00000012725.7	protein_coding	-	02 of 03	ENSMUST00000012725.7:c.34+14C>T	-	-	-	-	-	-	-	-	1	-	MGI	-	-	1	-	-	ENSMUSP00000012725	-	F6UQD0	UPI0002A47781	-	-	-	-	-	-	-	-	-
TpB_UVA_UV565_VEP_ALL.xlsx	TpB	UVA	UV565	13:67822381-67822381	T	intron_variant	MODIFIER	Zfp273	ENSMUSG00000030446	Transcript	ENSMUST00000181391.7	protein_coding	-	02 of 03	ENSMUST00000181391.7:c.133+14C>T	-	-	-	-	-	-	-	-	1	-	MGI	-	-	1	P1	CCDS49305.1	ENSMUSP00000137903	-	Q7M6W8	UPI00001E8779	-	-	-	-	-	-	-	-	-
TpB_UVA_UV565_VEP_ALL.xlsx	TpB	UVA	UV565	13:67822381-67822381	T	intron_variant,non_coding_transcript_variant	MODIFIER	4930525G20Rik	ENSMUSG00000097276	Transcript	ENSMUST00000181912.1	antisense	-	01 of 02	ENSMUST00000181912.1:n.152-1604G>A	-	-	-	-	-	-	-	-	-1	-	MGI	-	-	1	-	-	-	-	-	-	-	-	-	-	-	-	-	-	-
TpB_UVA_UV565_VEP_ALL.xlsx	TpB	UVA	UV565	13:68195800-68195800	A	intergenic_variant	MODIFIER	-	-	-	-	-	-	-	-	-	-	-	-	-	-	-	-	-	-	-	-	-	-	-	-	-	-	-	-	-	-	-	-	-	-	-	-	-
TpB_UVA_UV565_VEP_ALL.xlsx	TpB	UVA	UV565	13:93294964-93294964	A	downstream_gene_variant	MODIFIER	Gm2076	ENSMUSG00000098092	Transcript	ENSMUST00000182524.1	processed_pseudogene	-	-	-	-	-	-	-	-	-	-	213	1	-	MGI	-	-	-	-	-	-	-	-	-	-	-	-	-	-	-	-	-	-
TpB_UVA_UV565_VEP_ALL.xlsx	TpB	UVA	UV565	13:93294964-93294964	A	upstream_gene_variant	MODIFIER	Homer1	ENSMUSG00000007617	Transcript	ENSMUST00000220609.1	processed_transcript	-	-	-	-	-	-	-	-	-	-	4671	1	-	MGI	-	-	3	-	-	-	-	-	-	-	-	-	-	-	-	-	-	-
TpB_UVA_UV565_VEP_ALL.xlsx	TpB	UVA	UV565	13:93294967-93294967	A	downstream_gene_variant	MODIFIER	Gm2076	ENSMUSG00000098092	Transcript	ENSMUST00000182524.1	processed_pseudogene	-	-	-	-	-	-	-	-	-	-	216	1	-	MGI	-	-	-	-	-	-	-	-	-	-	-	-	-	-	-	-	-	-
TpB_UVA_UV565_VEP_ALL.xlsx	TpB	UVA	UV565	13:93294967-93294967	A	upstream_gene_variant	MODIFIER	Homer1	ENSMUSG00000007617	Transcript	ENSMUST00000220609.1	processed_transcript	-	-	-	-	-	-	-	-	-	-	4668	1	-	MGI	-	-	3	-	-	-	-	-	-	-	-	-	-	-	-	-	-	-
TpB_UVA_UV565_VEP_ALL.xlsx	TpB	UVA	UV565	14:43250987-43250987	G	non_coding_transcript_exon_variant	MODIFIER	Gm49146	ENSMUSG00000114544	Transcript	ENSMUST00000223745.1	processed_transcript	01 of 03	-	ENSMUST00000223745.1:n.398T>G	-	398	-	-	-	-	-	-	1	-	MGI	-	-	-	-	-	-	-	-	-	-	-	-	-	-	-	-	-	-
TpB_UVA_UV565_VEP_ALL.xlsx	TpB	UVA	UV565	14:43250987-43250987	G	non_coding_transcript_exon_variant	MODIFIER	Gm49146	ENSMUSG00000114544	Transcript	ENSMUST00000224139.1	transcribed_unprocessed_pseudogene	01 of 01	-	ENSMUST00000224139.1:n.168T>G	-	168	-	-	-	-	-	-	1	-	MGI	-	-	-	-	-	-	-	-	-	-	-	-	-	-	-	-	-	-
TpB_UVA_UV565_VEP_ALL.xlsx	TpB	UVA	UV565	14:43250987-43250987	G	upstream_gene_variant	MODIFIER	Gm49146	ENSMUSG00000114544	Transcript	ENSMUST00000225166.1	processed_transcript	-	-	-	-	-	-	-	-	-	-	4384	1	-	MGI	-	-	-	-	-	-	-	-	-	-	-	-	-	-	-	-	-	-
TpB_UVA_UV565_VEP_ALL.xlsx	TpB	UVA	UV565	14:43250987-43250987	G	regulatory_region_variant	MODIFIER	-	-	RegulatoryFeature	ENSMUSR00000086275	-	-	-	-	-	-	-	-	-	-	-	-	-	-	-	-	-	-	-	-	-	-	-	-	-	-	-	-	-	-	-	-	-
TpB_UVA_UV565_VEP_ALL.xlsx	TpB	UVA	UV565	14:43250987-43250987	G	regulatory_region_variant	MODIFIER	-	-	RegulatoryFeature	ENSMUSR00000347015	-	-	-	-	-	-	-	-	-	-	-	-	-	-	-	-	-	-	-	-	-	-	-	-	-	-	-	-	-	-	-	-	-
TpB_UVA_UV565_VEP_ALL.xlsx	TpB	UVA	UV565	14:51412875-51412875	C	intron_variant	MODIFIER	Vmn2r88	ENSMUSG00000000606	Transcript	ENSMUST00000022438.11	protein_coding	-	01 of 05	ENSMUST00000022438.11:c.207-163A>C	-	-	-	-	-	-	-	-	1	-	MGI	-	-	5	P2	CCDS56953.1	ENSMUSP00000022438	-	L7N1W8	UPI00015B9BB5	-	-	-	-	-	-	-	-	-
TpB_UVA_UV565_VEP_ALL.xlsx	TpB	UVA	UV565	14:51412875-51412875	C	intron_variant	MODIFIER	Vmn2r88	ENSMUSG00000000606	Transcript	ENSMUST00000159674.3	protein_coding	-	01 of 05	ENSMUST00000159674.3:c.207-163A>C	-	-	-	-	-	-	-	-	1	-	MGI	-	-	1	A2	-	ENSMUSP00000125126	-	F7D4U1	UPI0000192C50	-	-	-	-	-	-	-	-	-
TpB_UVA_UV565_VEP_ALL.xlsx	TpB	UVA	UV565	14:51412875-51412875	C	intron_variant,non_coding_transcript_variant	MODIFIER	Vmn2r-ps111	ENSMUSG00000089761	Transcript	ENSMUST00000161565.2	processed_transcript	-	01 of 01	ENSMUST00000161565.2:n.39-18838A>C	-	-	-	-	-	-	-	-	1	-	MGI	-	-	2	-	-	-	-	-	-	-	-	-	-	-	-	-	-	-
TpB_UVA_UV565_VEP_ALL.xlsx	TpB	UVA	UV565	14:51412875-51412875	C	intron_variant	MODIFIER	Gm7247	ENSMUSG00000068399	Transcript	ENSMUST00000162998.1	protein_coding	-	03 of 06	ENSMUST00000162998.1:c.254+47413A>C	-	-	-	-	-	-	-	-	1	-	MGI	-	-	5	P1	-	ENSMUSP00000125409	-	Q6UY52	UPI00001C1B41	-	-	-	-	-	-	-	-	-
TpB_UVA_UV565_VEP_ALL.xlsx	TpB	UVA	UV565	14:51412875-51412875	C	intron_variant	MODIFIER	Vmn2r88	ENSMUSG00000000606	Transcript	ENSMUST00000163019.8	protein_coding	-	01 of 03	ENSMUST00000163019.8:c.207-163A>C	-	-	-	-	-	-	-	-	1	-	MGI	-	-	1	-	-	ENSMUSP00000124837	-	F6U6R2	UPI00006071BD	-	-	-	-	-	-	-	-	-
TpB_UVA_UV565_VEP_ALL.xlsx	TpB	UVA	UV565	14:51412875-51412875	C	intron_variant	MODIFIER	Vmn2r88	ENSMUSG00000000606	Transcript	ENSMUST00000232797.1	protein_coding	-	01 of 04	ENSMUST00000232797.1:c.207-163A>C	-	-	-	-	-	-	-	-	1	-	MGI	-	-	-	-	-	ENSMUSP00000156867	-	A0A3B2W855	UPI000E6F0984	-	-	-	-	-	-	-	-	-
TpB_UVA_UV565_VEP_ALL.xlsx	TpB	UVA	UV565	14:51412875-51412875	C	intron_variant	MODIFIER	Vmn2r88	ENSMUSG00000000606	Transcript	ENSMUST00000232951.1	protein_coding	-	01 of 04	ENSMUST00000232951.1:c.207-163A>C	-	-	-	-	-	-	-	-	1	-	MGI	-	-	-	A2	-	ENSMUSP00000156671	-	A0A3B2WB46	UPI000E6F45EF	-	-	-	-	-	-	-	-	-
TpB_UVA_UV565_VEP_ALL.xlsx	TpB	UVA	UV565	14:51412875-51412875	C	intron_variant	MODIFIER	Vmn2r88	ENSMUSG00000000606	Transcript	ENSMUST00000233126.1	protein_coding	-	01 of 04	ENSMUST00000233126.1:c.207-163A>C	-	-	-	-	-	-	-	-	1	-	MGI	-	-	-	-	-	ENSMUSP00000156772	-	A0A3B2WBA9	UPI000E6F0727	-	-	-	-	-	-	-	-	-
TpB_UVA_UV565_VEP_ALL.xlsx	TpB	UVA	UV565	14:51412875-51412875	C	intron_variant	MODIFIER	Vmn2r88	ENSMUSG00000000606	Transcript	ENSMUST00000233280.1	protein_coding	-	01 of 05	ENSMUST00000233280.1:c.207-163A>C	-	-	-	-	-	-	-	-	1	-	MGI	-	-	-	A2	-	ENSMUSP00000156423	-	A0A3B2WCB0	UPI000E6E9DA1	-	-	-	-	-	-	-	-	-
TpB_UVA_UV565_VEP_ALL.xlsx	TpB	UVA	UV565	14:51412875-51412875	C	intron_variant	MODIFIER	Vmn2r88	ENSMUSG00000000606	Transcript	ENSMUST00000233394.1	protein_coding	-	01 of 05	ENSMUST00000233394.1:c.207-163A>C	-	-	-	-	-	-	-	-	1	-	MGI	-	-	-	A2	-	ENSMUSP00000156456	-	A0A3B2W7D8	UPI000E6F1036	-	-	-	-	-	-	-	-	-
TpB_UVA_UV565_VEP_ALL.xlsx	TpB	UVA	UV565	14:51412875-51412875	C	intron_variant	MODIFIER	Vmn2r88	ENSMUSG00000000606	Transcript	ENSMUST00000233651.1	protein_coding	-	01 of 03	ENSMUST00000233651.1:c.207-163A>C	-	-	-	-	-	-	-	-	1	-	MGI	-	-	-	-	-	ENSMUSP00000156606	-	F6U6R2	UPI00006071BD	-	-	-	-	-	-	-	-	-
TpB_UVA_UV565_VEP_ALL.xlsx	TpB	UVA	UV565	14:51412875-51412875	C	intron_variant	MODIFIER	Vmn2r88	ENSMUSG00000000606	Transcript	ENSMUST00000233766.1	protein_coding	-	01 of 03	ENSMUST00000233766.1:c.207-163A>C	-	-	-	-	-	-	-	-	1	-	MGI	-	-	-	-	-	ENSMUSP00000156821	-	A0A3B2W498	UPI00015DEDBB	-	-	-	-	-	-	-	-	-
TpB_UVA_UV565_VEP_ALL.xlsx	TpB	UVA	UV565	14:51412875-51412875	C	intron_variant	MODIFIER	Vmn2r88	ENSMUSG00000000606	Transcript	ENSMUST00000233848.1	protein_coding	-	01 of 05	ENSMUST00000233848.1:c.207-163A>C	-	-	-	-	-	-	-	-	1	-	MGI	-	-	-	A2	-	ENSMUSP00000156397	-	F7D4U1	UPI0000192C50	-	-	-	-	-	-	-	-	-
TpB_UVA_UV565_VEP_ALL.xlsx	TpB	UVA	UV565	14:51412875-51412875	C	intron_variant	MODIFIER	Vmn2r88	ENSMUSG00000000606	Transcript	ENSMUST00000233920.1	protein_coding	-	01 of 04	ENSMUST00000233920.1:c.207-163A>C	-	-	-	-	-	-	-	-	1	-	MGI	-	-	-	A2	-	ENSMUSP00000156955	-	A0A3B2WDD6	UPI000E6EDB83	-	-	-	-	-	-	-	-	-
TpB_UVA_UV565_VEP_ALL.xlsx	TpB	UVA	UV565	15:98488923-98488923	T	upstream_gene_variant	MODIFIER	Olfr279	ENSMUSG00000054036	Transcript	ENSMUST00000205772.2	protein_coding	-	-	-	-	-	-	-	-	-	-	3479	1	-	MGI	-	-	3	P1	CCDS27796.1	ENSMUSP00000145811	-	Q8VFD8	UPI0000028FEC	-	-	-	-	-	-	-	-	-
TpB_UVA_UV565_VEP_ALL.xlsx	TpB	UVA	UV565	15:98488923-98488923	T	upstream_gene_variant	MODIFIER	Olfr279	ENSMUSG00000054036	Transcript	ENSMUST00000216822.1	protein_coding	-	-	-	-	-	-	-	-	-	-	3479	1	-	MGI	-	-	5	P1	CCDS27796.1	ENSMUSP00000150851	-	Q8VFD8	UPI0000028FEC	-	-	-	-	-	-	-	-	-
TpB_UVA_UV565_VEP_ALL.xlsx	TpB	UVA	UV565	17:32090437-32090437	T	non_coding_transcript_exon_variant	MODIFIER	Pdxk-ps	ENSMUSG00000002791	Transcript	ENSMUST00000159650.7	processed_transcript	01 of 09	-	ENSMUST00000159650.7:n.987G>A	-	987	-	-	-	-	-	-	-1	-	MGI	-	-	1	-	-	-	-	-	-	-	-	-	-	-	-	-	-	-
TpB_UVA_UV565_VEP_ALL.xlsx	TpB	UVA	UV565	17:32090437-32090437	T	intron_variant,non_coding_transcript_variant	MODIFIER	Pdxk-ps	ENSMUSG00000002791	Transcript	ENSMUST00000160550.8	transcribed_unprocessed_pseudogene	-	01 of 10	ENSMUST00000160550.8:n.88-182G>A	-	-	-	-	-	-	-	-	-1	-	MGI	-	-	-	-	-	-	-	-	-	-	-	-	-	-	-	-	-	-
TpB_UVA_UV565_VEP_ALL.xlsx	TpB	UVA	UV565	17:32090437-32090437	T	intron_variant,non_coding_transcript_variant	MODIFIER	Pdxk-ps	ENSMUSG00000002791	Transcript	ENSMUST00000183934.1	processed_transcript	-	01 of 06	ENSMUST00000183934.1:n.264-182G>A	-	-	-	-	-	-	-	-	-1	-	MGI	-	-	3	-	-	-	-	-	-	-	-	-	-	-	-	-	-	-
TpB_UVA_UV565_VEP_ALL.xlsx	TpB	UVA	UV565	17:32090437-32090437	T	upstream_gene_variant	MODIFIER	Pdxk-ps	ENSMUSG00000002791	Transcript	ENSMUST00000235497.1	retained_intron	-	-	-	-	-	-	-	-	-	-	182	-1	-	MGI	-	-	-	-	-	-	-	-	-	-	-	-	-	-	-	-	-	-
TpB_UVA_UV565_VEP_ALL.xlsx	TpB	UVA	UV565	18:4198220-4198220	A	downstream_gene_variant	MODIFIER	Gm10557	ENSMUSG00000073647	Transcript	ENSMUST00000097690.4	processed_pseudogene	-	-	-	-	-	-	-	-	-	-	100	-1	-	MGI	-	-	-	-	-	-	-	-	-	-	-	-	-	-	-	-	-	-
TpB_UVA_UV565_VEP_ALL.xlsx	TpB	UVA	UV565	19:37413253-37413253	A	missense_variant	MODERATE	Kif11	ENSMUSG00000012443	Transcript	ENSMUST00000012587.3	protein_coding	19 of 22	-	ENSMUST00000012587.3:c.2677G>A	ENSMUSP00000012587.3:p.Gly893Arg	2868	2677	893	G/R	Gga/Aga	-	-	1	-	MGI	-	-	1	P1	CCDS29777.1	ENSMUSP00000012587	Q6P9P6	-	UPI00001E3ED9	tolerated(0.29)	-	-	-	-	-	-	-	-
TpB_UVA_UV565_VEP_ALL.xlsx	TpB	UVA	UV565	19:37413253-37413253	A	downstream_gene_variant	MODIFIER	Gm46649	ENSMUSG00000118211	Transcript	ENSMUST00000229520.2	processed_pseudogene	-	-	-	-	-	-	-	-	-	-	189	-1	-	MGI	-	-	-	-	-	-	-	-	-	-	-	-	-	-	-	-	-	-
TpB_UVA_UV565_VEP_ALL.xlsx	TpB	UVA	UV565	2:150791708-150791708	A	intron_variant	MODIFIER	Pygb	ENSMUSG00000033059	Transcript	ENSMUST00000045441.7	protein_coding	-	01 of 19	ENSMUST00000045441.7:c.243+4598G>A	-	-	-	-	-	-	-	-	1	-	MGI	-	-	1	P1	CCDS16862.1	ENSMUSP00000035743	Q8CI94	-	UPI0000027A68	-	-	-	-	-	-	-	-	-
TpB_UVA_UV565_VEP_ALL.xlsx	TpB	UVA	UV565	2:150791708-150791708	A	intron_variant,non_coding_transcript_variant	MODIFIER	Pygb	ENSMUSG00000033059	Transcript	ENSMUST00000139938.1	processed_transcript	-	01 of 06	ENSMUST00000139938.1:n.179+2524G>A	-	-	-	-	-	-	-	-	1	-	MGI	-	-	3	-	-	-	-	-	-	-	-	-	-	-	-	-	-	-
TpB_UVA_UV565_VEP_ALL.xlsx	TpB	UVA	UV565	4:88827598-88827598	T	synonymous_variant	LOW	Ifna6	ENSMUSG00000101252	Transcript	ENSMUST00000105146.3	protein_coding	01 of 01	-	ENSMUST00000105146.3:c.183C>T	ENSMUSP00000100777.3:p.Phe61%3D	183	183	61	F	ttC/ttT	-	-	1	-	MGI	-	-	-	P1	CCDS38811.1	ENSMUSP00000100777	-	Q810G5	UPI000017DD18	-	-	-	-	-	-	-	-	-
TpB_UVA_UV565_VEP_ALL.xlsx	TpB	UVA	UV565	4:147403330-147403330	G	intergenic_variant	MODIFIER	-	-	-	-	-	-	-	-	-	-	-	-	-	-	-	-	-	-	-	-	-	-	-	-	-	-	-	-	-	-	-	-	-	-	-	-	-
TpB_UVA_UV565_VEP_ALL.xlsx	TpB	UVA	UV565	5:14910767-14910767	G	intron_variant	MODIFIER	Gm9758	ENSMUSG00000033219	Transcript	ENSMUST00000035980.8	protein_coding	-	04 of 04	ENSMUST00000035980.8:c.625-173T>C	-	-	-	-	-	-	-	-	-1	-	MGI	-	-	1	P1	CCDS51416.1	ENSMUSP00000041597	-	Q80ZT2	UPI000000BC72	-	-	-	-	-	-	-	-	-
TpB_UVA_UV565_VEP_ALL.xlsx	TpB	UVA	UV565	5:14910767-14910767	G	downstream_gene_variant	MODIFIER	Gm9758	ENSMUSG00000033219	Transcript	ENSMUST00000154544.1	retained_intron	-	-	-	-	-	-	-	-	-	-	2630	-1	-	MGI	-	-	5	-	-	-	-	-	-	-	-	-	-	-	-	-	-	-
TpB_UVA_UV565_VEP_ALL.xlsx	TpB	UVA	UV565	5:15620607-15620607	T	intron_variant	MODIFIER	Speer4d	ENSMUSG00000070933	Transcript	ENSMUST00000095006.8	protein_coding	-	02 of 04	ENSMUST00000095006.8:c.167+162A>T	-	-	-	-	-	-	-	-	1	-	MGI	-	-	1	P1	CCDS19095.1	ENSMUSP00000092615	-	L7N216	UPI000024F7B7	-	-	-	-	-	-	-	-	-
TpB_UVA_UV565_VEP_ALL.xlsx	TpB	UVA	UV565	5:15620607-15620607	T	intron_variant	MODIFIER	Speer4d	ENSMUSG00000070933	Transcript	ENSMUST00000119100.1	protein_coding	-	01 of 03	ENSMUST00000119100.1:c.11+162A>T	-	-	-	-	-	-	-	-	1	-	MGI	-	-	2	-	-	ENSMUSP00000113289	-	L7N261	UPI00016117A7	-	-	-	-	-	-	-	-	-
TpB_UVA_UV565_VEP_ALL.xlsx	TpB	UVA	UV565	5:15620607-15620607	T	intron_variant,non_coding_transcript_variant	MODIFIER	Gm21847	ENSMUSG00000094230	Transcript	ENSMUST00000178227.5	antisense	-	02 of 02	ENSMUST00000178227.5:n.223-35227A>T	-	-	-	-	-	-	-	-	1	-	MGI	-	-	5	-	-	-	-	-	-	-	-	-	-	-	-	-	-	-
TpB_UVA_UV565_VEP_ALL.xlsx	TpB	UVA	UV565	5:15620607-15620607	T	regulatory_region_variant	MODIFIER	-	-	RegulatoryFeature	ENSMUSR00000676467	-	-	-	-	-	-	-	-	-	-	-	-	-	-	-	-	-	-	-	-	-	-	-	-	-	-	-	-	-	-	-	-	-
TpB_UVA_UV565_VEP_ALL.xlsx	TpB	UVA	UV565	5:120606629-120606629	A	downstream_gene_variant	MODIFIER	Rita1	ENSMUSG00000029600	Transcript	ENSMUST00000031599.8	protein_coding	-	-	-	-	-	-	-	-	-	-	2429	-1	-	MGI	-	-	1	P1	CCDS51635.1	ENSMUSP00000031599	Q9D1H0	-	UPI0000023259	-	-	-	-	-	-	-	-	-
TpB_UVA_UV565_VEP_ALL.xlsx	TpB	UVA	UV565	5:120606629-120606629	A	splice_region_variant,intron_variant	LOW	Iqcd	ENSMUSG00000029601	Transcript	ENSMUST00000069259.8	protein_coding	-	04 of 04	ENSMUST00000069259.8:c.928-6G>A	-	-	-	-	-	-	-	-	1	-	MGI	-	-	1	A2	-	ENSMUSP00000069167	Q9D3V1	-	UPI00001F260B	-	-	-	-	-	-	-	-	-
TpB_UVA_UV565_VEP_ALL.xlsx	TpB	UVA	UV565	5:120606629-120606629	A	splice_region_variant,intron_variant	LOW	Iqcd	ENSMUSG00000029601	Transcript	ENSMUST00000094391.5	protein_coding	-	04 of 04	ENSMUST00000094391.5:c.1027-6G>A	-	-	-	-	-	-	-	-	1	-	MGI	-	-	1	P2	CCDS19621.1	ENSMUSP00000091955	Q9D3V1	B2RPX1	UPI000002325A	-	-	-	-	-	-	-	-	-
TpB_UVA_UV565_VEP_ALL.xlsx	TpB	UVA	UV565	5:120606629-120606629	A	intron_variant	MODIFIER	Rita1	ENSMUSG00000029600	Transcript	ENSMUST00000111884.7	protein_coding	-	02 of 02	ENSMUST00000111884.7:c.269+4749C>T	-	-	-	-	-	-	-	-	-1	-	MGI	-	-	2	-	-	ENSMUSP00000107515	-	D3Z228	UPI00015AA3AD	-	-	-	-	-	-	-	-	-
TpB_UVA_UV565_VEP_ALL.xlsx	TpB	UVA	UV565	5:120606629-120606629	A	downstream_gene_variant	MODIFIER	Rita1	ENSMUSG00000029600	Transcript	ENSMUST00000136070.7	processed_transcript	-	-	-	-	-	-	-	-	-	-	413	-1	-	MGI	-	-	5	-	-	-	-	-	-	-	-	-	-	-	-	-	-	-
TpB_UVA_UV565_VEP_ALL.xlsx	TpB	UVA	UV565	5:120606629-120606629	A	downstream_gene_variant	MODIFIER	Rita1	ENSMUSG00000029600	Transcript	ENSMUST00000140554.1	protein_coding	-	-	-	-	-	-	-	-	-	-	3282	-1	cds_end_NF	MGI	-	-	5	-	-	ENSMUSP00000116344	-	D3Z5Q7	UPI00015AA3AC	-	-	-	-	-	-	-	-	-
TpB_UVA_UV565_VEP_ALL.xlsx	TpB	UVA	UV565	5:120606629-120606629	A	upstream_gene_variant	MODIFIER	Rita1	ENSMUSG00000029600	Transcript	ENSMUST00000147596.1	processed_transcript	-	-	-	-	-	-	-	-	-	-	912	-1	-	MGI	-	-	2	-	-	-	-	-	-	-	-	-	-	-	-	-	-	-
TpB_UVA_UV565_VEP_ALL.xlsx	TpB	UVA	UV565	5:120606629-120606629	A	intron_variant	MODIFIER	Rita1	ENSMUSG00000029600	Transcript	ENSMUST00000156356.1	protein_coding	-	01 of 02	ENSMUST00000156356.1:c.261-2382C>T	-	-	-	-	-	-	-	-	-1	cds_start_NF	MGI	-	-	5	-	-	ENSMUSP00000122910	-	F6Y0D0	UPI00015AA3AB	-	-	-	-	-	-	-	-	-
TpB_UVA_UV565_VEP_ALL.xlsx	TpB	UVA	UV565	5:120606629-120606629	A	downstream_gene_variant	MODIFIER	Rita1	ENSMUSG00000029600	Transcript	ENSMUST00000177800.7	protein_coding	-	-	-	-	-	-	-	-	-	-	2429	-1	-	MGI	-	-	5	P1	CCDS51635.1	ENSMUSP00000136946	Q9D1H0	-	UPI0000023259	-	-	-	-	-	-	-	-	-
TpB_UVA_UV565_VEP_ALL.xlsx	TpB	UVA	UV565	5:120606629-120606629	A	regulatory_region_variant	MODIFIER	-	-	RegulatoryFeature	ENSMUSR00000427773	-	-	-	-	-	-	-	-	-	-	-	-	-	-	-	-	-	-	-	-	-	-	-	-	-	-	-	-	-	-	-	-	-
TpB_UVA_UV565_VEP_ALL.xlsx	TpB	UVA	UV565	7:4943983-4943983	T	missense_variant	MODERATE	Ssc5d	ENSMUSG00000035279	Transcript	ENSMUST00000057612.8	protein_coding	14 of 14	-	ENSMUST00000057612.8:c.3335C>T	ENSMUSP00000052126.7:p.Thr1112Ile	3505	3335	1112	T/I	aCc/aTc	-	-	1	-	MGI	-	-	1	P1	CCDS20750.1	ENSMUSP00000052126	Q8BV57	-	UPI000002778C	deleterious_low_confidence(0.03)	-	-	-	-	-	-	-	-
TpB_UVA_UV565_VEP_ALL.xlsx	TpB	UVA	UV565	7:4943983-4943983	T	downstream_gene_variant	MODIFIER	Ssc5d	ENSMUSG00000035279	Transcript	ENSMUST00000207310.1	retained_intron	-	-	-	-	-	-	-	-	-	-	1116	1	-	MGI	-	-	2	-	-	-	-	-	-	-	-	-	-	-	-	-	-	-
TpB_UVA_UV565_VEP_ALL.xlsx	TpB	UVA	UV565	7:4943983-4943983	T	intron_variant	MODIFIER	Sbk2	ENSMUSG00000030433	Transcript	ENSMUST00000208109.1	protein_coding	-	03 of 03	ENSMUST00000208109.1:c.457-2767G>A	-	-	-	-	-	-	-	-	-1	-	MGI	-	-	5	-	-	ENSMUSP00000146819	-	A0A140LIH2	UPI0007699E32	-	-	-	-	-	-	-	-	-
TpB_UVA_UV565_VEP_ALL.xlsx	TpB	UVA	UV565	7:4943983-4943983	T	regulatory_region_variant	MODIFIER	-	-	RegulatoryFeature	ENSMUSR00000239236	-	-	-	-	-	-	-	-	-	-	-	-	-	-	-	-	-	-	-	-	-	-	-	-	-	-	-	-	-	-	-	-	-
TpB_UVA_UV565_VEP_ALL.xlsx	TpB	UVA	UV565	7:131138406-131138406	G	3_prime_UTR_variant	MODIFIER	4933402N03Rik	ENSMUSG00000013668	Transcript	ENSMUST00000070980.3	protein_coding	03 of 03	-	ENSMUST00000070980.3:c.*90T>C	-	1133	-	-	-	-	-	-	-1	-	MGI	-	-	1	P1	CCDS40156.1	ENSMUSP00000070291	-	Q8CDT9	UPI00000E91E7	-	-	-	-	-	-	-	-	-
TpB_UVA_UV565_VEP_ALL.xlsx	TpB	UVA	UV565	7:131138406-131138406	G	intron_variant	MODIFIER	Fgfr2	ENSMUSG00000030849	Transcript	ENSMUST00000124096.7	protein_coding	-	02 of 06	ENSMUST00000124096.7:c.-54-965467T>C	-	-	-	-	-	-	-	-	-1	-	MGI	-	-	5	-	-	ENSMUSP00000130971	-	F2Z480	UPI000066301C	-	-	-	-	-	-	-	-	-
TpB_UVA_UV565_VEP_ALL.xlsx	TpB	UVA	UV565	8:62487790-62487790	G	non_coding_transcript_exon_variant	MODIFIER	Hspd1-ps2	ENSMUSG00000109687	Transcript	ENSMUST00000210003.1	processed_pseudogene	01 of 01	-	ENSMUST00000210003.1:n.699T>C	-	699	-	-	-	-	-	-	-1	-	MGI	-	-	-	-	-	-	-	-	-	-	-	-	-	-	-	-	-	-
TpB_UVA_UV565_VEP_ALL.xlsx	TpB	UVA	UV565	8:69151990-69151990	A	intron_variant	MODIFIER	Lzts1	ENSMUSG00000036306	Transcript	ENSMUST00000185176.7	protein_coding	-	01 of 03	ENSMUST00000185176.7:c.-133-10904C>T	-	-	-	-	-	-	-	-	-1	-	MGI	-	-	5	P1	CCDS22345.1	ENSMUSP00000139117	P60853	-	UPI00000241D8	-	-	-	-	-	-	-	-	-
TpB_UVA_UV565_VEP_ALL.xlsx	TpB	UVA	UV565	9:4432748-4432748	T	intron_variant	MODIFIER	Gria4	ENSMUSG00000025892	Transcript	ENSMUST00000027020.12	protein_coding	-	15 of 16	ENSMUST00000027020.12:c.2409+25G>A	-	-	-	-	-	-	-	-	-1	-	MGI	-	-	5	A1	CCDS52715.1	ENSMUSP00000027020	-	G5E863	UPI000002272A	-	-	-	-	-	-	-	-	-
TpB_UVA_UV565_VEP_ALL.xlsx	TpB	UVA	UV565	9:4432748-4432748	T	intron_variant	MODIFIER	Gria4	ENSMUSG00000025892	Transcript	ENSMUST00000063508.14	protein_coding	-	14 of 16	ENSMUST00000063508.14:c.2295-5604G>A	-	-	-	-	-	-	-	-	-1	-	MGI	-	-	1	P3	CCDS22797.1	ENSMUSP00000066980	Q9Z2W8	-	UPI00002131A3	-	-	-	-	-	-	-	-	-
TpB_UVA_UV565_VEP_ALL.xlsx	TpB	UVA	UV565	9:4432748-4432748	T	intron_variant	MODIFIER	Gria4	ENSMUSG00000025892	Transcript	ENSMUST00000212533.1	protein_coding	-	14 of 15	ENSMUST00000212533.1:c.2409+25G>A	-	-	-	-	-	-	-	-	-1	-	MGI	-	-	1	A1	CCDS52715.1	ENSMUSP00000148533	-	G5E863	UPI000002272A	-	-	-	-	-	-	-	-	-
TpB_UVA_UV565_VEP_ALL.xlsx	TpB	UVA	UV565	9:27015311-27015311	A	stop_gained	HIGH	Vps26b	ENSMUSG00000031988	Transcript	ENSMUST00000034470.10	protein_coding	03 of 06	-	ENSMUST00000034470.10:c.391C>T	ENSMUSP00000034470.9:p.Arg131Ter	835	391	131	R/*	Cga/Tga	-	-	-1	-	MGI	-	-	1	P1	CCDS22938.1	ENSMUSP00000034470	Q8C0E2	-	UPI0000023945	-	-	-	-	-	-	-	-	-
TpB_UVA_UV565_VEP_ALL.xlsx	TpB	UVA	UV565	9:27015311-27015311	A	non_coding_transcript_exon_variant	MODIFIER	Vps26b	ENSMUSG00000031988	Transcript	ENSMUST00000213917.1	retained_intron	03 of 04	-	ENSMUST00000213917.1:n.800C>T	-	800	-	-	-	-	-	-	-1	-	MGI	-	-	1	-	-	-	-	-	-	-	-	-	-	-	-	-	-	-
TpB_UVA_UV565_VEP_ALL.xlsx	TpB	UVA	UV565	9:50624732-50624732	T	intron_variant	MODIFIER	Pih1d2	ENSMUSG00000000167	Transcript	ENSMUST00000000171.14	protein_coding	-	05 of 05	ENSMUST00000000171.14:c.814-128C>T	-	-	-	-	-	-	-	-	1	-	MGI	-	-	1	P1	CCDS23167.1	ENSMUSP00000000171	Q8CHR9	-	UPI00000E8D2D	-	-	-	-	-	-	-	-	-
TpB_UVA_UV565_VEP_ALL.xlsx	TpB	UVA	UV565	9:50624732-50624732	T	downstream_gene_variant	MODIFIER	Pih1d2	ENSMUSG00000000167	Transcript	ENSMUST00000124029.1	retained_intron	-	-	-	-	-	-	-	-	-	-	2089	1	-	MGI	-	-	1	-	-	-	-	-	-	-	-	-	-	-	-	-	-	-
TpB_UVA_UV565_VEP_ALL.xlsx	TpB	UVA	UV565	9:50624732-50624732	T	downstream_gene_variant	MODIFIER	Pih1d2	ENSMUSG00000000167	Transcript	ENSMUST00000125606.1	protein_coding	-	-	-	-	-	-	-	-	-	-	3667	1	cds_end_NF	MGI	-	-	2	-	-	ENSMUSP00000121100	-	D3YTM2	UPI0001889DEC	-	-	-	-	-	-	-	-	-
TpB_UVA_UV565_VEP_ALL.xlsx	TpB	UVA	UV565	9:50624732-50624732	T	intron_variant,NMD_transcript_variant	MODIFIER	Pih1d2	ENSMUSG00000000167	Transcript	ENSMUST00000132187.1	nonsense_mediated_decay	-	05 of 05	ENSMUST00000132187.1:c.*429-128C>T	-	-	-	-	-	-	-	-	1	-	MGI	-	-	1	-	-	ENSMUSP00000118064	Q8CHR9	-	UPI00015D7771	-	-	-	-	-	-	-	-	-
TpB_UVA_UV565_VEP_ALL.xlsx	TpB	UVA	UV565	9:50624732-50624732	T	downstream_gene_variant	MODIFIER	Pih1d2	ENSMUSG00000000167	Transcript	ENSMUST00000141366.7	protein_coding	-	-	-	-	-	-	-	-	-	-	3542	1	cds_end_NF	MGI	-	-	3	-	-	ENSMUSP00000122789	-	D3Z3T0	UPI0001889DEB	-	-	-	-	-	-	-	-	-
TpB_UVA_UV565_VEP_ALL.xlsx	TpB	UVA	UV565	9:50624732-50624732	T	downstream_gene_variant	MODIFIER	Pih1d2	ENSMUSG00000000167	Transcript	ENSMUST00000151197.7	protein_coding	-	-	-	-	-	-	-	-	-	-	2954	1	cds_end_NF	MGI	-	-	5	-	-	ENSMUSP00000119253	-	D3Z2K7	UPI0001889DED	-	-	-	-	-	-	-	-	-
TpB_UVA_UV565_VEP_ALL.xlsx	TpB	UVA	UV565	9:108860487-108860487	A	intron_variant	MODIFIER	Slc26a6	ENSMUSG00000023259	Transcript	ENSMUST00000098376.9	protein_coding	-	14 of 20	ENSMUST00000098376.9:c.1534-116G>A	-	-	-	-	-	-	-	-	1	-	MGI	-	-	5	A2	-	ENSMUSP00000095979	-	A0A0A0MQB3	UPI0002747288	-	-	-	-	-	-	-	-	-
TpB_UVA_UV565_VEP_ALL.xlsx	TpB	UVA	UV565	9:108860487-108860487	A	intron_variant	MODIFIER	Slc26a6	ENSMUSG00000023259	Transcript	ENSMUST00000188557.6	protein_coding	-	14 of 17	ENSMUST00000188557.6:c.1534-116G>A	-	-	-	-	-	-	-	-	1	cds_end_NF	MGI	-	-	1	P5	-	ENSMUSP00000140849	-	A0A087WS07	UPI0000D8B307	-	-	-	-	-	-	-	-	-
TpB_UVA_UV565_VEP_ALL.xlsx	TpB	UVA	UV565	9:108860487-108860487	A	intron_variant	MODIFIER	Slc26a6	ENSMUSG00000023259	Transcript	ENSMUST00000192507.5	protein_coding	-	13 of 16	ENSMUST00000192507.5:c.1534-116G>A	-	-	-	-	-	-	-	-	1	cds_end_NF	MGI	-	-	1	P5	-	ENSMUSP00000141336	-	A0A087WS07	UPI0000D8B307	-	-	-	-	-	-	-	-	-
TpB_UVA_UV565_VEP_ALL.xlsx	TpB	UVA	UV565	9:108860487-108860487	A	intron_variant,NMD_transcript_variant	MODIFIER	Slc26a6	ENSMUSG00000023259	Transcript	ENSMUST00000192559.5	nonsense_mediated_decay	-	14 of 15	ENSMUST00000192559.5:c.*759-116G>A	-	-	-	-	-	-	-	-	1	-	MGI	-	-	1	A2	-	ENSMUSP00000141632	-	A0A0A6YWP3	UPI00053BD645	-	-	-	-	-	-	-	-	-
TpB_UVA_UV565_VEP_ALL.xlsx	TpB	UVA	UV565	9:108860487-108860487	A	intron_variant	MODIFIER	Slc26a6	ENSMUSG00000023259	Transcript	ENSMUST00000193291.5	protein_coding	-	14 of 17	ENSMUST00000193291.5:c.1534-116G>A	-	-	-	-	-	-	-	-	1	cds_end_NF	MGI	-	-	1	P5	-	ENSMUSP00000142250	-	A0A087WS07	UPI0000D8B307	-	-	-	-	-	-	-	-	-
TpB_UVA_UV565_VEP_ALL.xlsx	TpB	UVA	UV565	9:108860487-108860487	A	intron_variant,non_coding_transcript_variant	MODIFIER	Slc26a6	ENSMUSG00000023259	Transcript	ENSMUST00000193463.5	retained_intron	-	11 of 14	ENSMUST00000193463.5:n.3633-116G>A	-	-	-	-	-	-	-	-	1	-	MGI	-	-	2	-	-	-	-	-	-	-	-	-	-	-	-	-	-	-
TpB_UVA_UV565_VEP_ALL.xlsx	TpB	UVA	UV565	9:108860487-108860487	A	intron_variant,NMD_transcript_variant	MODIFIER	Slc26a6	ENSMUSG00000023259	Transcript	ENSMUST00000193874.1	nonsense_mediated_decay	-	14 of 17	ENSMUST00000193874.1:c.*759-116G>A	-	-	-	-	-	-	-	-	1	-	MGI	-	-	5	A2	-	ENSMUSP00000141409	-	A0A0A6YWP3	UPI00053BD645	-	-	-	-	-	-	-	-	-
TpB_UVA_UV565_VEP_ALL.xlsx	TpB	UVA	UV565	9:108860487-108860487	A	intron_variant,non_coding_transcript_variant	MODIFIER	Slc26a6	ENSMUSG00000023259	Transcript	ENSMUST00000195646.5	retained_intron	-	12 of 15	ENSMUST00000195646.5:n.2023-116G>A	-	-	-	-	-	-	-	-	1	-	MGI	-	-	2	-	-	-	-	-	-	-	-	-	-	-	-	-	-	-
TpB_UVA_UV565_VEP_ALL.xlsx	TpB	UVA	UV565	X:32530349-32530349	T	intergenic_variant	MODIFIER	-	-	-	-	-	-	-	-	-	-	-	-	-	-	-	-	-	-	-	-	-	-	-	-	-	-	-	-	-	-	-	-	-	-	-	-	-
TpB_UVA_UV565_VEP_ALL.xlsx	TpB	UVA	UV565	X:74235706-74235706	C	missense_variant	MODERATE	Flna	ENSMUSG00000031328	Transcript	ENSMUST00000033699.12	protein_coding	21 of 47	-	ENSMUST00000033699.12:c.3719T>G	ENSMUSP00000033699.6:p.Val1240Gly	3838	3719	1240	V/G	gTg/gGg	-	-	-1	-	MGI	-	-	5	A1	-	ENSMUSP00000033699	Q8BTM8	-	UPI00001E409A	deleterious(0)	-	-	-	-	-	-	-	-
TpB_UVA_UV565_VEP_ALL.xlsx	TpB	UVA	UV565	X:74235706-74235706	C	missense_variant	MODERATE	Flna	ENSMUSG00000031328	Transcript	ENSMUST00000101454.8	protein_coding	21 of 46	-	ENSMUST00000101454.8:c.3719T>G	ENSMUSP00000098997.2:p.Val1240Gly	3817	3719	1240	V/G	gTg/gGg	-	-	-1	-	MGI	-	-	1	P2	CCDS41018.1	ENSMUSP00000098997	-	B7FAU9	UPI0000F0A5D9	deleterious(0)	-	-	-	-	-	-	-	-
TpB_UVA_UV565_VEP_ALL.xlsx	TpB	UVA	UV565	X:74235706-74235706	C	missense_variant	MODERATE	Flna	ENSMUSG00000031328	Transcript	ENSMUST00000114299.7	protein_coding	22 of 47	-	ENSMUST00000114299.7:c.3719T>G	ENSMUSP00000109938.1:p.Val1240Gly	3926	3719	1240	V/G	gTg/gGg	-	-	-1	-	MGI	-	-	5	P2	CCDS41018.1	ENSMUSP00000109938	-	B7FAU9	UPI0000F0A5D9	deleterious(0)	-	-	-	-	-	-	-	-
TpB_UVA_UV565_VEP_ALL.xlsx	TpB	UVA	UV565	X:74235706-74235706	C	missense_variant	MODERATE	Flna	ENSMUSG00000031328	Transcript	ENSMUST00000130007.7	protein_coding	21 of 45	-	ENSMUST00000130007.7:c.3647T>G	ENSMUSP00000121082.1:p.Val1216Gly	3647	3647	1216	V/G	gTg/gGg	-	-	-1	cds_start_NF	MGI	-	-	5	-	-	ENSMUSP00000121082	-	B7FAV1	UPI000164C33E	deleterious(0)	-	-	-	-	-	-	-	-
TpB_UVA_UV565_VEP_ALL.xlsx	TpB	UVA	UV565	X:74235706-74235706	C	non_coding_transcript_exon_variant	MODIFIER	Flna	ENSMUSG00000031328	Transcript	ENSMUST00000130203.1	processed_transcript	01 of 04	-	ENSMUST00000130203.1:n.257T>G	-	257	-	-	-	-	-	-	-1	-	MGI	-	-	5	-	-	-	-	-	-	-	-	-	-	-	-	-	-	-
TpB_UVA_UV565_VEP_ALL.xlsx	TpB	UVA	UV565	X:74235706-74235706	C	downstream_gene_variant	MODIFIER	Flna	ENSMUSG00000031328	Transcript	ENSMUST00000133288.1	processed_transcript	-	-	-	-	-	-	-	-	-	-	375	-1	-	MGI	-	-	2	-	-	-	-	-	-	-	-	-	-	-	-	-	-	-
TpB_UVA_UV565_VEP_ALL.xlsx	TpB	UVA	UV565	X:74235706-74235706	C	3_prime_UTR_variant,NMD_transcript_variant	MODIFIER	Flna	ENSMUSG00000031328	Transcript	ENSMUST00000144429.7	nonsense_mediated_decay	21 of 47	-	ENSMUST00000144429.7:c.*2145T>G	-	3679	-	-	-	-	-	-	-1	cds_start_NF	MGI	-	-	1	-	-	ENSMUSP00000123278	-	F6XC15	UPI000164C33B	-	-	-	-	-	-	-	-	-
TpB_UVA_UV565_VEP_ALL.xlsx	TpB	UVA	UV565	X:74235706-74235706	C	downstream_gene_variant	MODIFIER	Flna	ENSMUSG00000031328	Transcript	ENSMUST00000239316.1	nonsense_mediated_decay	-	-	-	-	-	-	-	-	-	-	4707	-1	cds_start_NF	MGI	-	-	-	-	-	ENSMUSP00000159282	-	-	-	-	-	-	-	-	-	-	-	-
TpB_UVA_UV565_VEP_ALL.xlsx	TpB	UVA	UV565	X:81822643-81822643	C	non_coding_transcript_exon_variant	MODIFIER	Actr3-ps	ENSMUSG00000082319	Transcript	ENSMUST00000118948.1	processed_pseudogene	01 of 01	-	ENSMUST00000118948.1:n.88A>G	-	88	-	-	-	-	-	-	-1	-	MGI	-	-	-	-	-	-	-	-	-	-	-	-	-	-	-	-	-	-
TpB_UVA_UV565_VEP_ALL.xlsx	TpB	UVA	UV565	X:81822643-81822643	C	regulatory_region_variant	MODIFIER	-	-	RegulatoryFeature	ENSMUSR00000473407	-	-	-	-	-	-	-	-	-	-	-	-	-	-	-	-	-	-	-	-	-	-	-	-	-	-	-	-	-	-	-	-	-
TpB_UVA_UV565_VEP_ALL.xlsx	TpB	UVA	UV565	X:114592372-114592372	A	non_coding_transcript_exon_variant	MODIFIER	Gm1866	ENSMUSG00000082070	Transcript	ENSMUST00000120701.1	processed_pseudogene	01 of 01	-	ENSMUST00000120701.1:n.153A>T	-	153	-	-	-	-	-	-	-1	-	MGI	-	-	-	-	-	-	-	-	-	-	-	-	-	-	-	-	-	-
TpB_UVA_UV565_VEP_ALL.xlsx	TpB	UVA	UV565	X:169987429-169987429	T	intron_variant	MODIFIER	Mid1	ENSMUSG00000035299	Transcript	ENSMUST00000036753.11	protein_coding	-	08 of 09	ENSMUST00000036753.11:c.1487-130C>T	-	-	-	-	-	-	-	-	1	-	MGI	-	-	5	P1	CCDS41215.1	ENSMUSP00000038765	O70583	-	UPI000019349A	-	-	-	-	-	-	-	-	-
TpB_UVA_UV565_VEP_ALL.xlsx	TpB	UVA	UV565	X:169987429-169987429	T	intron_variant	MODIFIER	Mid1	ENSMUSG00000035299	Transcript	ENSMUST00000078947.11	protein_coding	-	08 of 09	ENSMUST00000078947.11:c.1373-130C>T	-	-	-	-	-	-	-	-	1	-	MGI	-	-	5	-	-	ENSMUSP00000077974	-	B1AV01	UPI0000EE05A4	-	-	-	-	-	-	-	-	-
TpB_UVA_UV565_VEP_ALL.xlsx	TpB	UVA	UV565	X:169987429-169987429	T	intron_variant	MODIFIER	Mid1	ENSMUSG00000035299	Transcript	ENSMUST00000079443.5	protein_coding	-	05 of 06	ENSMUST00000079443.5:c.647-130C>T	-	-	-	-	-	-	-	-	1	-	MGI	-	-	5	-	-	ENSMUSP00000078412	-	Q6PD02	UPI00001D6DCC	-	-	-	-	-	-	-	-	-
TpB_UVA_UV565_VEP_ALL.xlsx	TpB	UVA	UV565	X:169987429-169987429	T	intron_variant	MODIFIER	Mid1	ENSMUSG00000035299	Transcript	ENSMUST00000112104.7	protein_coding	-	08 of 09	ENSMUST00000112104.7:c.1487-130C>T	-	-	-	-	-	-	-	-	1	-	MGI	-	-	5	P1	CCDS41215.1	ENSMUSP00000107732	O70583	-	UPI000019349A	-	-	-	-	-	-	-	-	-
TpB_UVA_UV565_VEP_ALL.xlsx	TpB	UVA	UV565	X:169987429-169987429	T	intron_variant	MODIFIER	Mid1	ENSMUSG00000035299	Transcript	ENSMUST00000112105.7	protein_coding	-	08 of 09	ENSMUST00000112105.7:c.1487-130C>T	-	-	-	-	-	-	-	-	1	-	MGI	-	-	5	P1	CCDS41215.1	ENSMUSP00000107733	O70583	-	UPI000019349A	-	-	-	-	-	-	-	-	-
TpB_UVA_UV565_VEP_ALL.xlsx	TpB	UVA	UV565	X:169987429-169987429	T	intron_variant	MODIFIER	Mid1	ENSMUSG00000035299	Transcript	ENSMUST00000112107.7	protein_coding	-	08 of 09	ENSMUST00000112107.7:c.869-130C>T	-	-	-	-	-	-	-	-	1	-	MGI	-	-	5	-	-	ENSMUSP00000107735	-	B1AUZ9	UPI0000EE05A3	-	-	-	-	-	-	-	-	-
TpB_UVA_UV565_VEP_ALL.xlsx	TpB	UVA	UV565	X:169987429-169987429	T	upstream_gene_variant	MODIFIER	Gm15247	ENSMUSG00000086695	Transcript	ENSMUST00000124513.1	antisense	-	-	-	-	-	-	-	-	-	-	490	-1	-	MGI	-	-	1	-	-	-	-	-	-	-	-	-	-	-	-	-	-	-
TpB_UVA_UV565_VEP_ALL.xlsx	TpB	UVA	UV565	X:169987429-169987429	T	downstream_gene_variant	MODIFIER	Mid1	ENSMUSG00000035299	Transcript	ENSMUST00000129642.7	processed_transcript	-	-	-	-	-	-	-	-	-	-	3455	1	-	MGI	-	-	1	-	-	-	-	-	-	-	-	-	-	-	-	-	-	-
TpB_UVA_UV565_VEP_ALL.xlsx	TpB	UVA	UV565	X:169987429-169987429	T	downstream_gene_variant	MODIFIER	Mid1	ENSMUSG00000035299	Transcript	ENSMUST00000133857.7	processed_transcript	-	-	-	-	-	-	-	-	-	-	3455	1	-	MGI	-	-	5	-	-	-	-	-	-	-	-	-	-	-	-	-	-	-
TpB_UVA_UV565_VEP_ALL.xlsx	TpB	UVA	UV565	X:169987429-169987429	T	downstream_gene_variant	MODIFIER	Mid1	ENSMUSG00000035299	Transcript	ENSMUST00000143815.1	processed_transcript	-	-	-	-	-	-	-	-	-	-	3455	1	-	MGI	-	-	1	-	-	-	-	-	-	-	-	-	-	-	-	-	-	-
TpB_UVA_UV565_VEP_ALL.xlsx	TpB	UVA	UV565	X:169987429-169987429	T	upstream_gene_variant	MODIFIER	Gm15726	ENSMUSG00000087263	Transcript	ENSMUST00000144738.1	antisense	-	-	-	-	-	-	-	-	-	-	2197	-1	-	MGI	-	-	3	-	-	-	-	-	-	-	-	-	-	-	-	-	-	-
TpB_UVA_UV565_VEP_ALL.xlsx	TpB	UVA	UV565	X:169987429-169987429	T	downstream_gene_variant	MODIFIER	Mid1	ENSMUSG00000035299	Transcript	ENSMUST00000146073.7	processed_transcript	-	-	-	-	-	-	-	-	-	-	3455	1	-	MGI	-	-	5	-	-	-	-	-	-	-	-	-	-	-	-	-	-	-
TpB_UVA_UV565_VEP_ALL.xlsx	TpB	UVA	UV565	X:169987429-169987429	T	downstream_gene_variant	MODIFIER	Mid1	ENSMUSG00000035299	Transcript	ENSMUST00000151722.7	processed_transcript	-	-	-	-	-	-	-	-	-	-	3454	1	-	MGI	-	-	1	-	-	-	-	-	-	-	-	-	-	-	-	-	-	-
TpB_UVA_UV565_VEP_ALL.xlsx	TpB	UVA	UV565	X:169987429-169987429	T	downstream_gene_variant	MODIFIER	Mid1	ENSMUSG00000035299	Transcript	ENSMUST00000152163.7	processed_transcript	-	-	-	-	-	-	-	-	-	-	3455	1	-	MGI	-	-	1	-	-	-	-	-	-	-	-	-	-	-	-	-	-	-
TpB_UVA_UV565_VEP_ALL.xlsx	TpB	UVA	UV565	X:169987429-169987429	T	intron_variant	MODIFIER	Mid1	ENSMUSG00000035299	Transcript	ENSMUST00000163810.8	protein_coding	-	07 of 08	ENSMUST00000163810.8:c.1487-130C>T	-	-	-	-	-	-	-	-	1	-	MGI	-	-	5	P1	CCDS41215.1	ENSMUSP00000128176	O70583	-	UPI000019349A	-	-	-	-	-	-	-	-	-
TpB_UVA_UV565_VEP_ALL.xlsx	TpB	UVA	UV565	X:169987429-169987429	T	intron_variant	MODIFIER	Mid1	ENSMUSG00000035299	Transcript	ENSMUST00000171433.7	protein_coding	-	07 of 09	ENSMUST00000171433.7:c.1487-130C>T	-	-	-	-	-	-	-	-	1	-	MGI	-	-	5	P1	CCDS41215.1	ENSMUSP00000126746	O70583	-	UPI000019349A	-	-	-	-	-	-	-	-	-
TpB_UVA_UV565_VEP_ALL.xlsx	TpB	UVA	UV565	X:169987429-169987429	T	regulatory_region_variant	MODIFIER	-	-	RegulatoryFeature	ENSMUSR00000475878	-	-	-	-	-	-	-	-	-	-	-	-	-	-	-	-	-	-	-	-	-	-	-	-	-	-	-	-	-	-	-	-	-
TpB_UVA_UV568_VEP_ALL.xlsx	TpB	UVA	UV568	1:85273814-85273814	T	upstream_gene_variant	MODIFIER	C130026I21Rik	ENSMUSG00000052477	Transcript	ENSMUST00000064341.8	protein_coding	-	-	-	-	-	-	-	-	-	-	3248	-1	-	MGI	-	-	1	P3	CCDS15109.1	ENSMUSP00000066587	-	Q3KNJ6	UPI000058C09D	-	-	-	-	-	-	-	-	-
TpB_UVA_UV568_VEP_ALL.xlsx	TpB	UVA	UV568	1:85280548-85280548	T	intron_variant,non_coding_transcript_variant	MODIFIER	Gm16026	ENSMUSG00000079455	Transcript	ENSMUST00000159695.1	transcribed_unprocessed_pseudogene	-	03 of 06	ENSMUST00000159695.1:n.394+639C>T	-	-	-	-	-	-	-	-	1	-	MGI	-	-	-	-	-	-	-	-	-	-	-	-	-	-	-	-	-	-
TpB_UVA_UV568_VEP_ALL.xlsx	TpB	UVA	UV568	1:85280579-85280579	G	intron_variant,non_coding_transcript_variant	MODIFIER	Gm16026	ENSMUSG00000079455	Transcript	ENSMUST00000159695.1	transcribed_unprocessed_pseudogene	-	03 of 06	ENSMUST00000159695.1:n.394+670A>G	-	-	-	-	-	-	-	-	1	-	MGI	-	-	-	-	-	-	-	-	-	-	-	-	-	-	-	-	-	-
TpB_UVA_UV568_VEP_ALL.xlsx	TpB	UVA	UV568	1:107292213-107292213	T	splice_donor_variant,non_coding_transcript_variant	HIGH	Gm8089	ENSMUSG00000084189	Transcript	ENSMUST00000122463.1	unprocessed_pseudogene	-	03 of 05	ENSMUST00000122463.1:n.339+1G>A	-	-	-	-	-	-	-	-	-1	-	MGI	-	-	-	-	-	-	-	-	-	-	-	-	-	-	-	-	-	-
TpB_UVA_UV568_VEP_ALL.xlsx	TpB	UVA	UV568	1:180802866-180802866	A	3_prime_UTR_variant	MODIFIER	H3f3a	ENSMUSG00000060743	Transcript	ENSMUST00000081026.10	protein_coding	04 of 04	-	ENSMUST00000081026.10:c.*211G>T	-	719	-	-	-	-	-	-	-1	-	MGI	-	-	5	A1	-	ENSMUSP00000079816	-	F8WI35	UPI000035411A	-	-	-	-	-	-	-	-	-
TpB_UVA_UV568_VEP_ALL.xlsx	TpB	UVA	UV568	11:102896958-102896958	T	missense_variant	MODERATE	Gfap	ENSMUSG00000020932	Transcript	ENSMUST00000067444.9	protein_coding	01 of 09	-	ENSMUST00000067444.9:c.160G>A	ENSMUSP00000064691.3:p.Ala54Thr	174	160	54	A/T	Gcg/Acg	-	-	-1	-	MGI	-	-	1	P1	CCDS25507.1	ENSMUSP00000064691	P03995	-	UPI0000192B9B	deleterious(0.01)	-	-	-	-	-	-	-	-
TpB_UVA_UV568_VEP_ALL.xlsx	TpB	UVA	UV568	11:102896958-102896958	T	intron_variant,non_coding_transcript_variant	MODIFIER	Gfap	ENSMUSG00000020932	Transcript	ENSMUST00000127909.1	processed_transcript	-	01 of 03	ENSMUST00000127909.1:n.147-1148G>A	-	-	-	-	-	-	-	-	-1	-	MGI	-	-	3	-	-	-	-	-	-	-	-	-	-	-	-	-	-	-
TpB_UVA_UV568_VEP_ALL.xlsx	TpB	UVA	UV568	12:38120561-38120561	G	intron_variant	MODIFIER	Dgkb	ENSMUSG00000036095	Transcript	ENSMUST00000040500.8	protein_coding	-	05 of 24	ENSMUST00000040500.8:c.443-45A>G	-	-	-	-	-	-	-	-	1	-	MGI	-	-	1	P1	CCDS25889.1	ENSMUSP00000037900	Q6NS52	-	UPI00001C4DDF	-	-	-	-	-	-	-	-	-
TpB_UVA_UV568_VEP_ALL.xlsx	TpB	UVA	UV568	13:22043139-22043139	G	upstream_gene_variant	MODIFIER	H2ac11	ENSMUSG00000069301	Transcript	ENSMUST00000091741.5	protein_coding	-	-	-	-	-	-	-	-	-	-	195	-1	-	MGI	-	-	-	P1	CCDS26307.1	ENSMUSP00000089335	C0HKE1,C0HKE2,C0HKE3,C0HKE4,C0HKE5,C0HKE6,C0HKE7,C0HKE8,C0HKE9	B2RVF0	UPI00000007AF	-	-	-	-	-	-	-	-	-
TpB_UVA_UV568_VEP_ALL.xlsx	TpB	UVA	UV568	13:61567948-61567948	G	intron_variant	MODIFIER	Cts3	ENSMUSG00000074870	Transcript	ENSMUST00000054702.8	protein_coding	-	04 of 07	ENSMUST00000054702.8:c.396+107T>C	-	-	-	-	-	-	-	-	-1	-	MGI	-	-	1	P1	CCDS36695.1	ENSMUSP00000058359	-	Q91ZD5	UPI0000021BF4	-	-	-	-	-	-	-	-	-
TpB_UVA_UV568_VEP_ALL.xlsx	TpB	UVA	UV568	13:61567978-61567978	G	intron_variant	MODIFIER	Cts3	ENSMUSG00000074870	Transcript	ENSMUST00000054702.8	protein_coding	-	04 of 07	ENSMUST00000054702.8:c.396+77T>C	-	-	-	-	-	-	-	-	-1	-	MGI	-	-	1	P1	CCDS36695.1	ENSMUSP00000058359	-	Q91ZD5	UPI0000021BF4	-	-	-	-	-	-	-	-	-
TpB_UVA_UV568_VEP_ALL.xlsx	TpB	UVA	UV568	13:61780841-61780841	G	intergenic_variant	MODIFIER	-	-	-	-	-	-	-	-	-	-	-	-	-	-	-	-	-	-	-	-	-	-	-	-	-	-	-	-	-	-	-	-	-	-	-	-	-
TpB_UVA_UV568_VEP_ALL.xlsx	TpB	UVA	UV568	13:61785872-61785872	A	intergenic_variant	MODIFIER	-	-	-	-	-	-	-	-	-	-	-	-	-	-	-	-	-	-	-	-	-	-	-	-	-	-	-	-	-	-	-	-	-	-	-	-	-
TpB_UVA_UV568_VEP_ALL.xlsx	TpB	UVA	UV568	13:61786112-61786112	G	intergenic_variant	MODIFIER	-	-	-	-	-	-	-	-	-	-	-	-	-	-	-	-	-	-	-	-	-	-	-	-	-	-	-	-	-	-	-	-	-	-	-	-	-
TpB_UVA_UV568_VEP_ALL.xlsx	TpB	UVA	UV568	13:62047138-62047138	G	intron_variant,non_coding_transcript_variant	MODIFIER	Gm3325	ENSMUSG00000113836	Transcript	ENSMUST00000220871.1	processed_transcript	-	01 of 03	ENSMUST00000220871.1:n.449-43T>G	-	-	-	-	-	-	-	-	1	-	MGI	-	-	2	-	-	-	-	-	-	-	-	-	-	-	-	-	-	-
TpB_UVA_UV568_VEP_ALL.xlsx	TpB	UVA	UV568	13:62146182-62146182	C	intron_variant	MODIFIER	Zfp808	ENSMUSG00000074867	Transcript	ENSMUST00000099449.3	protein_coding	-	01 of 03	ENSMUST00000099449.3:c.3+16154T>C	-	-	-	-	-	-	-	-	1	-	MGI	-	-	1	P1	CCDS36696.1	ENSMUSP00000097048	-	B8JJZ4	UPI0000606E6C	-	-	-	-	-	-	-	-	-
TpB_UVA_UV568_VEP_ALL.xlsx	TpB	UVA	UV568	13:65340736-65340736	G	intron_variant,non_coding_transcript_variant	MODIFIER	Gm7762	ENSMUSG00000113406	Transcript	ENSMUST00000220595.1	lincRNA	-	02 of 03	ENSMUST00000220595.1:n.242-127T>C	-	-	-	-	-	-	-	-	-1	-	MGI	-	-	3	-	-	-	-	-	-	-	-	-	-	-	-	-	-	-
TpB_UVA_UV568_VEP_ALL.xlsx	TpB	UVA	UV568	13:65431209-65431209	G	intron_variant,non_coding_transcript_variant	MODIFIER	Vmn2r-ps96	ENSMUSG00000114065	Transcript	ENSMUST00000221218.1	unprocessed_pseudogene	-	03 of 05	ENSMUST00000221218.1:n.1273+105T>C	-	-	-	-	-	-	-	-	-1	-	MGI	-	-	-	-	-	-	-	-	-	-	-	-	-	-	-	-	-	-
TpB_UVA_UV568_VEP_ALL.xlsx	TpB	UVA	UV568	13:65512937-65512937	T	downstream_gene_variant	MODIFIER	Gm10139	ENSMUSG00000063905	Transcript	ENSMUST00000081471.2	protein_coding	-	-	-	-	-	-	-	-	-	-	89	1	-	MGI	-	-	-	P1	-	ENSMUSP00000080191	-	O88245	UPI00000294B2	-	-	-	-	-	-	-	-	-
TpB_UVA_UV568_VEP_ALL.xlsx	TpB	UVA	UV568	13:65512938-65512938	G	downstream_gene_variant	MODIFIER	Gm10139	ENSMUSG00000063905	Transcript	ENSMUST00000081471.2	protein_coding	-	-	-	-	-	-	-	-	-	-	90	1	-	MGI	-	-	-	P1	-	ENSMUSP00000080191	-	O88245	UPI00000294B2	-	-	-	-	-	-	-	-	-
TpB_UVA_UV568_VEP_ALL.xlsx	TpB	UVA	UV568	13:65512977-65512977	T	downstream_gene_variant	MODIFIER	Gm10139	ENSMUSG00000063905	Transcript	ENSMUST00000081471.2	protein_coding	-	-	-	-	-	-	-	-	-	-	129	1	-	MGI	-	-	-	P1	-	ENSMUSP00000080191	-	O88245	UPI00000294B2	-	-	-	-	-	-	-	-	-
TpB_UVA_UV568_VEP_ALL.xlsx	TpB	UVA	UV568	13:65590893-65590893	T	intron_variant,non_coding_transcript_variant	MODIFIER	Gm26639	ENSMUSG00000097562	Transcript	ENSMUST00000181426.3	lincRNA	-	01 of 01	ENSMUST00000181426.3:n.28-109C>A	-	-	-	-	-	-	-	-	-1	-	MGI	-	-	1	-	-	-	-	-	-	-	-	-	-	-	-	-	-	-
TpB_UVA_UV568_VEP_ALL.xlsx	TpB	UVA	UV568	13:65648480-65648480	G	upstream_gene_variant	MODIFIER	Gm48185	ENSMUSG00000113870	Transcript	ENSMUST00000222090.1	processed_pseudogene	-	-	-	-	-	-	-	-	-	-	1078	1	-	MGI	-	-	-	-	-	-	-	-	-	-	-	-	-	-	-	-	-	-
TpB_UVA_UV568_VEP_ALL.xlsx	TpB	UVA	UV568	13:65948475-65948475	G	non_coding_transcript_exon_variant	MODIFIER	Vmn2r-ps100	ENSMUSG00000113723	Transcript	ENSMUST00000221238.2	unprocessed_pseudogene	04 of 04	-	ENSMUST00000221238.2:n.795C>G	-	795	-	-	-	-	-	-	1	-	MGI	-	-	-	-	-	-	-	-	-	-	-	-	-	-	-	-	-	-
TpB_UVA_UV568_VEP_ALL.xlsx	TpB	UVA	UV568	13:66062677-66062677	A	intergenic_variant	MODIFIER	-	-	-	-	-	-	-	-	-	-	-	-	-	-	-	-	-	-	-	-	-	-	-	-	-	-	-	-	-	-	-	-	-	-	-	-	-
TpB_UVA_UV568_VEP_ALL.xlsx	TpB	UVA	UV568	13:66062679-66062679	A	intergenic_variant	MODIFIER	-	-	-	-	-	-	-	-	-	-	-	-	-	-	-	-	-	-	-	-	-	-	-	-	-	-	-	-	-	-	-	-	-	-	-	-	-
TpB_UVA_UV568_VEP_ALL.xlsx	TpB	UVA	UV568	13:66119588-66119588	A	intron_variant	MODIFIER	Gm10324	ENSMUSG00000095909	Transcript	ENSMUST00000092528.5	protein_coding	-	01 of 03	ENSMUST00000092528.5:c.3+39T>A	-	-	-	-	-	-	-	-	1	-	MGI	-	-	5	P1	-	ENSMUSP00000090190	-	L7N208	UPI0001D16928	-	-	-	-	-	-	-	-	-
TpB_UVA_UV568_VEP_ALL.xlsx	TpB	UVA	UV568	13:66210613-66210613	T	intergenic_variant	MODIFIER	-	-	-	-	-	-	-	-	-	-	-	-	-	-	-	-	-	-	-	-	-	-	-	-	-	-	-	-	-	-	-	-	-	-	-	-	-
TpB_UVA_UV568_VEP_ALL.xlsx	TpB	UVA	UV568	13:66343195-66343195	G	upstream_gene_variant	MODIFIER	C330022B21Rik	ENSMUSG00000114729	Transcript	ENSMUST00000224620.1	processed_pseudogene	-	-	-	-	-	-	-	-	-	-	260	-1	-	MGI	-	-	-	-	-	-	-	-	-	-	-	-	-	-	-	-	-	-
TpB_UVA_UV568_VEP_ALL.xlsx	TpB	UVA	UV568	13:66351494-66351494	T	intron_variant,non_coding_transcript_variant	MODIFIER	Vmn2r-ps104	ENSMUSG00000094499	Transcript	ENSMUST00000099416.4	transcribed_unprocessed_pseudogene	-	04 of 04	ENSMUST00000099416.4:n.1426-95T>A	-	-	-	-	-	-	-	-	-1	-	MGI	-	-	5	-	-	-	-	-	-	-	-	-	-	-	-	-	-	-
TpB_UVA_UV568_VEP_ALL.xlsx	TpB	UVA	UV568	13:66680544-66680544	G	intron_variant,non_coding_transcript_variant	MODIFIER	Zfp640	ENSMUSG00000074830	Transcript	ENSMUST00000071320.5	processed_transcript	-	01 of 03	ENSMUST00000071320.5:n.87-7214G>C	-	-	-	-	-	-	-	-	-1	-	MGI	-	-	5	-	-	-	-	-	-	-	-	-	-	-	-	-	-	-
TpB_UVA_UV568_VEP_ALL.xlsx	TpB	UVA	UV568	13:66795008-66795008	C	upstream_gene_variant	MODIFIER	Gm48413	ENSMUSG00000114314	Transcript	ENSMUST00000224105.1	processed_pseudogene	-	-	-	-	-	-	-	-	-	-	4289	1	-	MGI	-	-	-	-	-	-	-	-	-	-	-	-	-	-	-	-	-	-
TpB_UVA_UV568_VEP_ALL.xlsx	TpB	UVA	UV568	13:66802297-66802297	T	downstream_gene_variant	MODIFIER	Gm48413	ENSMUSG00000114314	Transcript	ENSMUST00000224105.1	processed_pseudogene	-	-	-	-	-	-	-	-	-	-	2907	1	-	MGI	-	-	-	-	-	-	-	-	-	-	-	-	-	-	-	-	-	-
TpB_UVA_UV568_VEP_ALL.xlsx	TpB	UVA	UV568	13:66809553-66809553	A	non_coding_transcript_exon_variant	MODIFIER	Vmn2r-ps108	ENSMUSG00000117784	Transcript	ENSMUST00000222552.2	unprocessed_pseudogene	05 of 05	-	ENSMUST00000222552.2:n.1709C>T	-	1709	-	-	-	-	-	-	-1	-	MGI	-	-	-	-	-	-	-	-	-	-	-	-	-	-	-	-	-	-
TpB_UVA_UV568_VEP_ALL.xlsx	TpB	UVA	UV568	13:67181812-67181812	A	missense_variant	MODERATE	Rsl1	ENSMUSG00000058900	Transcript	ENSMUST00000021997.7	protein_coding	04 of 04	-	ENSMUST00000021997.7:c.323C>A	ENSMUSP00000021997.6:p.Thr108Lys	359	323	108	T/K	aCa/aAa	-	-	1	-	MGI	-	-	1	P1	CCDS26613.1	ENSMUSP00000021997	-	Q7M6Y1	UPI000021CAA2	tolerated(0.84)	-	-	-	-	-	-	-	-
TpB_UVA_UV568_VEP_ALL.xlsx	TpB	UVA	UV568	13:67181812-67181812	A	3_prime_UTR_variant,NMD_transcript_variant	MODIFIER	Rsl1	ENSMUSG00000058900	Transcript	ENSMUST00000225334.1	nonsense_mediated_decay	04 of 04	-	ENSMUST00000225334.1:c.*255C>A	-	397	-	-	-	-	-	-	1	-	MGI	-	-	-	-	-	ENSMUSP00000153578	-	A0A286YDU4	UPI000BAD5A12	-	-	-	-	-	-	-	-	-
TpB_UVA_UV568_VEP_ALL.xlsx	TpB	UVA	UV568	13:67181957-67181957	T	synonymous_variant	LOW	Rsl1	ENSMUSG00000058900	Transcript	ENSMUST00000021997.7	protein_coding	04 of 04	-	ENSMUST00000021997.7:c.468C>T	ENSMUSP00000021997.6:p.Phe156%3D	504	468	156	F	ttC/ttT	-	-	1	-	MGI	-	-	1	P1	CCDS26613.1	ENSMUSP00000021997	-	Q7M6Y1	UPI000021CAA2	-	-	-	-	-	-	-	-	-
TpB_UVA_UV568_VEP_ALL.xlsx	TpB	UVA	UV568	13:67181957-67181957	T	downstream_gene_variant	MODIFIER	Rsl1	ENSMUSG00000058900	Transcript	ENSMUST00000225334.1	nonsense_mediated_decay	-	-	-	-	-	-	-	-	-	-	145	1	-	MGI	-	-	-	-	-	ENSMUSP00000153578	-	A0A286YDU4	UPI000BAD5A12	-	-	-	-	-	-	-	-	-
TpB_UVA_UV568_VEP_ALL.xlsx	TpB	UVA	UV568	13:67822381-67822381	T	intron_variant	MODIFIER	Zfp273	ENSMUSG00000030446	Transcript	ENSMUST00000012725.7	protein_coding	-	02 of 03	ENSMUST00000012725.7:c.34+14C>T	-	-	-	-	-	-	-	-	1	-	MGI	-	-	1	-	-	ENSMUSP00000012725	-	F6UQD0	UPI0002A47781	-	-	-	-	-	-	-	-	-
TpB_UVA_UV568_VEP_ALL.xlsx	TpB	UVA	UV568	13:68195800-68195800	A	intergenic_variant	MODIFIER	-	-	-	-	-	-	-	-	-	-	-	-	-	-	-	-	-	-	-	-	-	-	-	-	-	-	-	-	-	-	-	-	-	-	-	-	-
TpB_UVA_UV568_VEP_ALL.xlsx	TpB	UVA	UV568	13:119596772-119596772	T	intron_variant	MODIFIER	Tmem267	ENSMUSG00000074634	Transcript	ENSMUST00000099147.4	protein_coding	-	03 of 03	ENSMUST00000099147.4:c.*36-13665C>T	-	-	-	-	-	-	-	-	1	-	MGI	-	-	5	P1	CCDS56899.1	ENSMUSP00000096751	-	H3BJ86	UPI0001D134CD	-	-	-	-	-	-	-	-	-
TpB_UVA_UV568_VEP_ALL.xlsx	TpB	UVA	UV568	14:34092498-34092498	A	intron_variant	MODIFIER	Anxa8	ENSMUSG00000021950	Transcript	ENSMUST00000022519.14	protein_coding	-	04 of 11	ENSMUST00000022519.14:c.322-32G>A	-	-	-	-	-	-	-	-	1	-	MGI	-	-	1	P1	CCDS26932.1	ENSMUSP00000022519	O35640	-	UPI0000021D7C	-	-	-	-	-	-	-	-	-
TpB_UVA_UV568_VEP_ALL.xlsx	TpB	UVA	UV568	14:51412875-51412875	C	intron_variant	MODIFIER	Vmn2r88	ENSMUSG00000000606	Transcript	ENSMUST00000022438.11	protein_coding	-	01 of 05	ENSMUST00000022438.11:c.207-163A>C	-	-	-	-	-	-	-	-	1	-	MGI	-	-	5	P2	CCDS56953.1	ENSMUSP00000022438	-	L7N1W8	UPI00015B9BB5	-	-	-	-	-	-	-	-	-
TpB_UVA_UV568_VEP_ALL.xlsx	TpB	UVA	UV568	15:75086687-75086687	A	regulatory_region_variant	MODIFIER	-	-	RegulatoryFeature	ENSMUSR00000101624	-	-	-	-	-	-	-	-	-	-	-	-	-	-	-	-	-	-	-	-	-	-	-	-	-	-	-	-	-	-	-	-	-
TpB_UVA_UV568_VEP_ALL.xlsx	TpB	UVA	UV568	17:20623945-20623945	A	synonymous_variant	LOW	Fpr-rs3	ENSMUSG00000060701	Transcript	ENSMUST00000071189.1	protein_coding	01 of 01	-	ENSMUST00000071189.1:c.933C>T	ENSMUSP00000071179.1:p.Ser311%3D	933	933	311	S	tcC/tcT	-	-	-1	-	MGI	-	-	-	P1	CCDS49989.1	ENSMUSP00000071179	O88537	-	UPI0000026E92	-	-	-	-	-	-	-	-	-
TpB_UVA_UV568_VEP_ALL.xlsx	TpB	UVA	UV568	17:32090437-32090437	T	non_coding_transcript_exon_variant	MODIFIER	Pdxk-ps	ENSMUSG00000002791	Transcript	ENSMUST00000159650.7	processed_transcript	01 of 09	-	ENSMUST00000159650.7:n.987G>A	-	987	-	-	-	-	-	-	-1	-	MGI	-	-	1	-	-	-	-	-	-	-	-	-	-	-	-	-	-	-
TpB_UVA_UV568_VEP_ALL.xlsx	TpB	UVA	UV568	19:41302536-41302536	C	missense_variant	MODERATE	Pik3ap1	ENSMUSG00000025017	Transcript	ENSMUST00000059672.8	protein_coding	10 of 17	-	ENSMUST00000059672.8:c.1556A>G	ENSMUSP00000052777.7:p.Asp519Gly	1683	1556	519	D/G	gAt/gGt	-	-	-1	-	MGI	-	-	1	P1	CCDS37987.1	ENSMUSP00000052777	Q9EQ32	-	UPI000002736C	tolerated(0.12)	-	-	-	-	-	-	-	-
TpB_UVA_UV568_VEP_ALL.xlsx	TpB	UVA	UV568	19:41302536-41302536	C	downstream_gene_variant	MODIFIER	Pik3ap1	ENSMUSG00000025017	Transcript	ENSMUST00000235978.1	retained_intron	-	-	-	-	-	-	-	-	-	-	4816	-1	-	MGI	-	-	-	-	-	-	-	-	-	-	-	-	-	-	-	-	-	-
TpB_UVA_UV568_VEP_ALL.xlsx	TpB	UVA	UV568	2:174346831-174346831	C	downstream_gene_variant	MODIFIER	Gnas	ENSMUSG00000027523	Transcript	ENSMUST00000080493.11	protein_coding	-	-	-	-	-	-	-	-	-	-	329	1	-	MGI	-	-	1	-	CCDS17151.1	ENSMUSP00000079341	Q6R0H7	-	UPI000023B625	-	-	-	-	-	-	-	-	-
TpB_UVA_UV568_VEP_ALL.xlsx	TpB	UVA	UV568	4:146206433-146206433	G	upstream_gene_variant	MODIFIER	Gm13165	ENSMUSG00000086654	Transcript	ENSMUST00000152923.1	antisense	-	-	-	-	-	-	-	-	-	-	1076	-1	-	MGI	-	-	5	-	-	-	-	-	-	-	-	-	-	-	-	-	-	-
TpB_UVA_UV568_VEP_ALL.xlsx	TpB	UVA	UV568	4:146263512-146263512	T	upstream_gene_variant	MODIFIER	Gm13168	ENSMUSG00000081460	Transcript	ENSMUST00000121771.1	processed_pseudogene	-	-	-	-	-	-	-	-	-	-	47	1	-	MGI	-	-	-	-	-	-	-	-	-	-	-	-	-	-	-	-	-	-
TpB_UVA_UV568_VEP_ALL.xlsx	TpB	UVA	UV568	5:14934167-14934167	T	missense_variant	MODERATE	Speer4e	ENSMUSG00000091255	Transcript	ENSMUST00000159973.2	protein_coding	05 of 05	-	ENSMUST00000159973.2:c.634G>A	ENSMUSP00000125587.2:p.Ala212Thr	657	634	212	A/T	Gct/Act	-	-	-1	-	MGI	-	-	5	P1	CCDS51417.1	ENSMUSP00000125587	-	K7N6S8	UPI0000603AFE	tolerated(1)	-	-	-	-	-	-	-	-
TpB_UVA_UV568_VEP_ALL.xlsx	TpB	UVA	UV568	5:14934167-14934167	T	regulatory_region_variant	MODIFIER	-	-	RegulatoryFeature	ENSMUSR00000676206	-	-	-	-	-	-	-	-	-	-	-	-	-	-	-	-	-	-	-	-	-	-	-	-	-	-	-	-	-	-	-	-	-
TpB_UVA_UV568_VEP_ALL.xlsx	TpB	UVA	UV568	5:25985187-25985187	T	missense_variant	MODERATE	Gm21698	ENSMUSG00000096045	Transcript	ENSMUST00000178487.1	protein_coding	03 of 04	-	ENSMUST00000178487.1:c.373G>A	ENSMUSP00000137405.1:p.Glu125Lys	373	373	125	E/K	Gag/Aag	-	-	-1	-	MGI	-	-	5	-	-	ENSMUSP00000137405	-	J3QK71	UPI000274729E	deleterious(0)	-	-	-	-	-	-	-	-
TpB_UVA_UV568_VEP_ALL.xlsx	TpB	UVA	UV568	5:27860334-27860334	T	non_coding_transcript_exon_variant	MODIFIER	Gm43096	ENSMUSG00000104882	Transcript	ENSMUST00000196173.1	processed_pseudogene	01 of 01	-	ENSMUST00000196173.1:n.105G>A	-	105	-	-	-	-	-	-	-1	-	MGI	-	-	-	-	-	-	-	-	-	-	-	-	-	-	-	-	-	-
TpB_UVA_UV568_VEP_ALL.xlsx	TpB	UVA	UV568	5:120606629-120606629	A	downstream_gene_variant	MODIFIER	Rita1	ENSMUSG00000029600	Transcript	ENSMUST00000031599.8	protein_coding	-	-	-	-	-	-	-	-	-	-	2429	-1	-	MGI	-	-	1	P1	CCDS51635.1	ENSMUSP00000031599	Q9D1H0	-	UPI0000023259	-	-	-	-	-	-	-	-	-
TpB_UVA_UV568_VEP_ALL.xlsx	TpB	UVA	UV568	5:145409830-145409830	G	non_coding_transcript_exon_variant	MODIFIER	Gm42859	ENSMUSG00000105764	Transcript	ENSMUST00000199572.1	processed_pseudogene	01 of 01	-	ENSMUST00000199572.1:n.183A>G	-	183	-	-	-	-	-	-	1	-	MGI	-	-	-	-	-	-	-	-	-	-	-	-	-	-	-	-	-	-
TpB_UVA_UV568_VEP_ALL.xlsx	TpB	UVA	UV568	6:15376629-15376629	G	intron_variant	MODIFIER	Foxp2	ENSMUSG00000029563	Transcript	ENSMUST00000031545.13	protein_coding	-	03 of 16	ENSMUST00000031545.13:c.259-60T>G	-	-	-	-	-	-	-	-	1	-	MGI	-	-	1	P3	CCDS19918.1	ENSMUSP00000031545	P58463	-	UPI00000E5BA4	-	-	-	-	-	-	-	-	-
TpB_UVA_UV568_VEP_ALL.xlsx	TpB	UVA	UV568	6:77758293-77758293	C	intron_variant	MODIFIER	Ctnna2	ENSMUSG00000063063	Transcript	ENSMUST00000075340.11	protein_coding	-	03 of 17	ENSMUST00000075340.11:c.298+103T>G	-	-	-	-	-	-	-	-	-1	-	MGI	-	-	5	A1	CCDS39521.1	ENSMUSP00000074809	Q61301	-	UPI0000217FC7	-	-	-	-	-	-	-	-	-
TpB_UVA_UV568_VEP_ALL.xlsx	TpB	UVA	UV568	7:4943983-4943983	T	missense_variant	MODERATE	Ssc5d	ENSMUSG00000035279	Transcript	ENSMUST00000057612.8	protein_coding	14 of 14	-	ENSMUST00000057612.8:c.3335C>T	ENSMUSP00000052126.7:p.Thr1112Ile	3505	3335	1112	T/I	aCc/aTc	-	-	1	-	MGI	-	-	1	P1	CCDS20750.1	ENSMUSP00000052126	Q8BV57	-	UPI000002778C	deleterious_low_confidence(0.03)	-	-	-	-	-	-	-	-
TpB_UVA_UV568_VEP_ALL.xlsx	TpB	UVA	UV568	7:4943983-4943983	T	downstream_gene_variant	MODIFIER	Ssc5d	ENSMUSG00000035279	Transcript	ENSMUST00000207310.1	retained_intron	-	-	-	-	-	-	-	-	-	-	1116	1	-	MGI	-	-	2	-	-	-	-	-	-	-	-	-	-	-	-	-	-	-
TpB_UVA_UV568_VEP_ALL.xlsx	TpB	UVA	UV568	8:22647564-22647564	A	intron_variant	MODIFIER	Polb	ENSMUSG00000031536	Transcript	ENSMUST00000033938.6	protein_coding	-	04 of 13	ENSMUST00000033938.6:c.262-93C>T	-	-	-	-	-	-	-	-	-1	-	MGI	-	-	1	P1	CCDS22181.1	ENSMUSP00000033938	Q8K409	-	UPI0000028A90	-	-	-	-	-	-	-	-	-
TpB_UVA_UV568_VEP_ALL.xlsx	TpB	UVA	UV568	8:22647565-22647565	A	intron_variant	MODIFIER	Polb	ENSMUSG00000031536	Transcript	ENSMUST00000033938.6	protein_coding	-	04 of 13	ENSMUST00000033938.6:c.262-94G>T	-	-	-	-	-	-	-	-	-1	-	MGI	-	-	1	P1	CCDS22181.1	ENSMUSP00000033938	Q8K409	-	UPI0000028A90	-	-	-	-	-	-	-	-	-
TpB_UVA_UV568_VEP_ALL.xlsx	TpB	UVA	UV568	9:4432748-4432748	T	intron_variant	MODIFIER	Gria4	ENSMUSG00000025892	Transcript	ENSMUST00000027020.12	protein_coding	-	15 of 16	ENSMUST00000027020.12:c.2409+25G>A	-	-	-	-	-	-	-	-	-1	-	MGI	-	-	5	A1	CCDS52715.1	ENSMUSP00000027020	-	G5E863	UPI000002272A	-	-	-	-	-	-	-	-	-
TpB_UVA_UV568_VEP_ALL.xlsx	TpB	UVA	UV568	9:65391316-65391316	T	missense_variant	MODERATE	Kbtbd13	ENSMUSG00000054978	Transcript	ENSMUST00000068307.3	protein_coding	01 of 01	-	ENSMUST00000068307.3:c.337G>A	ENSMUSP00000136872.1:p.Ala113Thr	337	337	113	A/T	Gcc/Acc	-	-	-1	-	MGI	-	-	-	P1	CCDS57682.1	ENSMUSP00000136872	Q8C828	-	UPI00001E44EB	deleterious(0)	-	-	-	-	-	-	-	-
TpB_UVA_UV568_VEP_ALL.xlsx	TpB	UVA	UV568	9:65391316-65391316	T	regulatory_region_variant	MODIFIER	-	-	RegulatoryFeature	ENSMUSR00000465906	-	-	-	-	-	-	-	-	-	-	-	-	-	-	-	-	-	-	-	-	-	-	-	-	-	-	-	-	-	-	-	-	-
TpB_UVA_UV568_VEP_ALL.xlsx	TpB	UVA	UV568	X:68668868-68668868	A	intergenic_variant	MODIFIER	-	-	-	-	-	-	-	-	-	-	-	-	-	-	-	-	-	-	-	-	-	-	-	-	-	-	-	-	-	-	-	-	-	-	-	-	-
TpB_UVA_UV568_VEP_ALL.xlsx	TpB	UVA	UV568	X:74230085-74230085	A	missense_variant	MODERATE	Flna	ENSMUSG00000031328	Transcript	ENSMUST00000033699.12	protein_coding	32 of 47	-	ENSMUST00000033699.12:c.5387C>T	ENSMUSP00000033699.6:p.Pro1796Leu	5506	5387	1796	P/L	cCc/cTc	-	-	-1	-	MGI	-	-	5	A1	-	ENSMUSP00000033699	Q8BTM8	-	UPI00001E409A	deleterious(0.01)	-	-	-	-	-	-	-	-
TpB_UVA_UV568_VEP_ALL.xlsx	TpB	UVA	UV568	X:74230085-74230085	A	upstream_gene_variant	MODIFIER	Flna	ENSMUSG00000031328	Transcript	ENSMUST00000124950.1	retained_intron	-	-	-	-	-	-	-	-	-	-	2465	-1	-	MGI	-	-	2	-	-	-	-	-	-	-	-	-	-	-	-	-	-	-
TpB_UVA_UV568_VEP_ALL.xlsx	TpB	UVA	UV568	X:75316371-75316371	G	intron_variant	MODIFIER	F8	ENSMUSG00000031196	Transcript	ENSMUST00000033539.12	protein_coding	-	12 of 25	ENSMUST00000033539.12:c.1903+138A>C	-	-	-	-	-	-	-	-	-1	-	MGI	-	-	1	P3	CCDS30238.1	ENSMUSP00000033539	Q06194	-	UPI0000193225	-	-	-	-	-	-	-	-	-
TpB_UVA_UV574_VEP_ALL.xlsx	TpB	UVA	UV574	1:74609015-74609015	T	synonymous_variant	LOW	Stk36	ENSMUSG00000033276	Transcript	ENSMUST00000087183.10	protein_coding	06 of 27	-	ENSMUST00000087183.10:c.438C>T	ENSMUSP00000084430.4:p.Phe146%3D	696	438	146	F	ttC/ttT	-	-	1	-	MGI	-	-	5	P1	CCDS35619.1	ENSMUSP00000084430	Q69ZM6	-	UPI0000530313	-	-	-	-	-	-	-	-	-
TpB_UVA_UV574_VEP_ALL.xlsx	TpB	UVA	UV574	1:74609015-74609015	T	downstream_gene_variant	MODIFIER	Stk36	ENSMUSG00000033276	Transcript	ENSMUST00000113694.7	protein_coding	-	-	-	-	-	-	-	-	-	-	3490	1	-	MGI	-	-	1	-	-	ENSMUSP00000109324	-	Q9D9B2	UPI0000025621	-	-	-	-	-	-	-	-	-
TpB_UVA_UV574_VEP_ALL.xlsx	TpB	UVA	UV574	1:74609015-74609015	T	missense_variant,NMD_transcript_variant	MODERATE	Stk36	ENSMUSG00000033276	Transcript	ENSMUST00000189830.1	nonsense_mediated_decay	03 of 05	-	ENSMUST00000189830.1:c.145C>T	ENSMUSP00000140912.1:p.Arg49Cys	151	145	49	R/C	Cgc/Tgc	-	-	1	-	MGI	-	-	3	-	-	ENSMUSP00000140912	-	A0A087WS61	UPI00046210A9	deleterious(0)	-	-	-	-	-	-	-	-
TpB_UVA_UV574_VEP_ALL.xlsx	TpB	UVA	UV574	1:85100855-85100855	T	downstream_gene_variant	MODIFIER	Gm10553	ENSMUSG00000073631	Transcript	ENSMUST00000097669.1	antisense	-	-	-	-	-	-	-	-	-	-	320	1	-	MGI	-	-	-	-	-	-	-	-	-	-	-	-	-	-	-	-	-	-
TpB_UVA_UV574_VEP_ALL.xlsx	TpB	UVA	UV574	1:85280579-85280579	G	intron_variant,non_coding_transcript_variant	MODIFIER	Gm16026	ENSMUSG00000079455	Transcript	ENSMUST00000159695.1	transcribed_unprocessed_pseudogene	-	03 of 06	ENSMUST00000159695.1:n.394+670A>G	-	-	-	-	-	-	-	-	1	-	MGI	-	-	-	-	-	-	-	-	-	-	-	-	-	-	-	-	-	-
TpB_UVA_UV574_VEP_ALL.xlsx	TpB	UVA	UV574	1:88224574-88224574	A	downstream_gene_variant	MODIFIER	Ugt1a7c	ENSMUSG00000090124	Transcript	ENSMUST00000058237.13	protein_coding	-	-	-	-	-	-	-	-	-	-	4572	1	-	MGI	-	-	1	P3	CCDS15139.1	ENSMUSP00000058683	Q6ZQM8	-	UPI00001957F5	-	-	-	-	-	-	-	-	-
TpB_UVA_UV574_VEP_ALL.xlsx	TpB	UVA	UV574	11:23280342-23280342	T	intron_variant	MODIFIER	Xpo1	ENSMUSG00000020290	Transcript	ENSMUST00000020538.12	protein_coding	-	10 of 25	ENSMUST00000020538.12:c.760-32A>T	-	-	-	-	-	-	-	-	1	-	MGI	-	-	5	P1	CCDS24475.1	ENSMUSP00000020538	Q6P5F9	-	UPI000022467D	-	-	-	-	-	-	-	-	-
TpB_UVA_UV574_VEP_ALL.xlsx	TpB	UVA	UV574	11:23280343-23280343	T	intron_variant	MODIFIER	Xpo1	ENSMUSG00000020290	Transcript	ENSMUST00000020538.12	protein_coding	-	10 of 25	ENSMUST00000020538.12:c.760-31A>T	-	-	-	-	-	-	-	-	1	-	MGI	-	-	5	P1	CCDS24475.1	ENSMUSP00000020538	Q6P5F9	-	UPI000022467D	-	-	-	-	-	-	-	-	-
TpB_UVA_UV574_VEP_ALL.xlsx	TpB	UVA	UV574	13:61742061-61742061	C	intron_variant,non_coding_transcript_variant	MODIFIER	Gm49357	ENSMUSG00000113295	Transcript	ENSMUST00000222397.1	lincRNA	-	01 of 02	ENSMUST00000222397.1:n.132-101G>C	-	-	-	-	-	-	-	-	1	-	MGI	-	-	5	-	-	-	-	-	-	-	-	-	-	-	-	-	-	-
TpB_UVA_UV574_VEP_ALL.xlsx	TpB	UVA	UV574	13:61742093-61742093	G	intron_variant,non_coding_transcript_variant	MODIFIER	Gm49357	ENSMUSG00000113295	Transcript	ENSMUST00000222397.1	lincRNA	-	01 of 02	ENSMUST00000222397.1:n.132-69A>G	-	-	-	-	-	-	-	-	1	-	MGI	-	-	5	-	-	-	-	-	-	-	-	-	-	-	-	-	-	-
TpB_UVA_UV574_VEP_ALL.xlsx	TpB	UVA	UV574	14:5019683-5019683	T	downstream_gene_variant	MODIFIER	Gm3298	ENSMUSG00000079383	Transcript	ENSMUST00000165289.7	protein_coding	-	-	-	-	-	-	-	-	-	-	1006	1	-	MGI	-	-	1	P1	-	ENSMUSP00000126766	-	L7N281	UPI0001BA2C59	-	-	-	-	-	-	-	-	-
TpB_UVA_UV574_VEP_ALL.xlsx	TpB	UVA	UV574	14:43250987-43250987	G	non_coding_transcript_exon_variant	MODIFIER	Gm49146	ENSMUSG00000114544	Transcript	ENSMUST00000223745.1	processed_transcript	01 of 03	-	ENSMUST00000223745.1:n.398T>G	-	398	-	-	-	-	-	-	1	-	MGI	-	-	-	-	-	-	-	-	-	-	-	-	-	-	-	-	-	-
TpB_UVA_UV574_VEP_ALL.xlsx	TpB	UVA	UV574	14:51412875-51412875	C	intron_variant	MODIFIER	Vmn2r88	ENSMUSG00000000606	Transcript	ENSMUST00000022438.11	protein_coding	-	01 of 05	ENSMUST00000022438.11:c.207-163A>C	-	-	-	-	-	-	-	-	1	-	MGI	-	-	5	P2	CCDS56953.1	ENSMUSP00000022438	-	L7N1W8	UPI00015B9BB5	-	-	-	-	-	-	-	-	-
TpB_UVA_UV574_VEP_ALL.xlsx	TpB	UVA	UV574	15:98118303-98118303	T	intron_variant	MODIFIER	Pfkm	ENSMUSG00000033065	Transcript	ENSMUST00000051226.7	protein_coding	-	03 of 22	ENSMUST00000051226.7:c.159+48C>T	-	-	-	-	-	-	-	-	1	-	MGI	-	-	1	P1	CCDS27786.1	ENSMUSP00000059801	P47857	-	UPI00000040A3	-	-	-	-	-	-	-	-	-
TpB_UVA_UV574_VEP_ALL.xlsx	TpB	UVA	UV574	16:29349099-29349099	T	missense_variant	MODERATE	Atp13a5	ENSMUSG00000048939	Transcript	ENSMUST00000075806.10	protein_coding	03 of 30	-	ENSMUST00000075806.10:c.241G>A	ENSMUSP00000075204.4:p.Glu81Lys	436	241	81	E/K	Gaa/Aaa	-	-	-1	-	MGI	-	-	1	P1	CCDS28095.1	ENSMUSP00000075204	Q3TYU2	-	UPI0000354F04	deleterious(0.01)	-	-	-	-	-	-	-	-
TpB_UVA_UV574_VEP_ALL.xlsx	TpB	UVA	UV574	17:32090437-32090437	T	non_coding_transcript_exon_variant	MODIFIER	Pdxk-ps	ENSMUSG00000002791	Transcript	ENSMUST00000159650.7	processed_transcript	01 of 09	-	ENSMUST00000159650.7:n.987G>A	-	987	-	-	-	-	-	-	-1	-	MGI	-	-	1	-	-	-	-	-	-	-	-	-	-	-	-	-	-	-
TpB_UVA_UV574_VEP_ALL.xlsx	TpB	UVA	UV574	19:7693663-7693663	A	intron_variant	MODIFIER	Slc22a19	ENSMUSG00000024757	Transcript	ENSMUST00000025666.7	protein_coding	-	03 of 09	ENSMUST00000025666.7:c.661+23G>T	-	-	-	-	-	-	-	-	-1	-	MGI	-	-	1	P1	CCDS29532.1	ENSMUSP00000025666	Q8VCA0	-	UPI0000022422	-	-	-	-	-	-	-	-	-
TpB_UVA_UV574_VEP_ALL.xlsx	TpB	UVA	UV574	19:37413253-37413253	A	missense_variant	MODERATE	Kif11	ENSMUSG00000012443	Transcript	ENSMUST00000012587.3	protein_coding	19 of 22	-	ENSMUST00000012587.3:c.2677G>A	ENSMUSP00000012587.3:p.Gly893Arg	2868	2677	893	G/R	Gga/Aga	-	-	1	-	MGI	-	-	1	P1	CCDS29777.1	ENSMUSP00000012587	Q6P9P6	-	UPI00001E3ED9	tolerated(0.29)	-	-	-	-	-	-	-	-
TpB_UVA_UV574_VEP_ALL.xlsx	TpB	UVA	UV574	19:37413253-37413253	A	downstream_gene_variant	MODIFIER	Gm46649	ENSMUSG00000118211	Transcript	ENSMUST00000229520.2	processed_pseudogene	-	-	-	-	-	-	-	-	-	-	189	-1	-	MGI	-	-	-	-	-	-	-	-	-	-	-	-	-	-	-	-	-	-
TpB_UVA_UV574_VEP_ALL.xlsx	TpB	UVA	UV574	2:64936289-64936289	T	intron_variant	MODIFIER	Grb14	ENSMUSG00000026888	Transcript	ENSMUST00000028252.13	protein_coding	-	05 of 13	ENSMUST00000028252.13:c.672+128C>A	-	-	-	-	-	-	-	-	-1	-	MGI	-	-	1	P1	CCDS16071.1	ENSMUSP00000028252	Q9JLM9	A2ASX2	UPI0000022A3D	-	-	-	-	-	-	-	-	-
TpB_UVA_UV574_VEP_ALL.xlsx	TpB	UVA	UV574	2:130654755-130654755	T	intron_variant	MODIFIER	Ddrgk1	ENSMUSG00000068290	Transcript	ENSMUST00000089559.10	protein_coding	-	07 of 08	ENSMUST00000089559.10:c.733-45G>A	-	-	-	-	-	-	-	-	-1	-	MGI	-	-	1	P1	CCDS38243.1	ENSMUSP00000086988	Q80WW9	-	UPI00001D4713	-	-	-	-	-	-	-	-	-
TpB_UVA_UV574_VEP_ALL.xlsx	TpB	UVA	UV574	3:87759152-87759152	A	synonymous_variant	LOW	Pear1	ENSMUSG00000028073	Transcript	ENSMUST00000029714.14	protein_coding	04 of 23	-	ENSMUST00000029714.14:c.243C>T	ENSMUSP00000029714.8:p.Asp81%3D	349	243	81	D	gaC/gaT	-	-	-1	-	MGI	-	-	5	P1	CCDS38474.1	ENSMUSP00000029714	Q8VIK5	-	UPI00000E8885	-	-	-	-	-	-	-	-	-
TpB_UVA_UV574_VEP_ALL.xlsx	TpB	UVA	UV574	3:87759152-87759152	A	non_coding_transcript_exon_variant	MODIFIER	Pear1	ENSMUSG00000028073	Transcript	ENSMUST00000172631.7	retained_intron	04 of 21	-	ENSMUST00000172631.7:n.313C>T	-	313	-	-	-	-	-	-	-1	-	MGI	-	-	5	-	-	-	-	-	-	-	-	-	-	-	-	-	-	-
TpB_UVA_UV574_VEP_ALL.xlsx	TpB	UVA	UV574	4:147324652-147324652	G	intron_variant	MODIFIER	Zfp988	ENSMUSG00000078498	Transcript	ENSMUST00000148762.3	protein_coding	-	01 of 03	ENSMUST00000148762.3:c.-74-122C>G	-	-	-	-	-	-	-	-	1	-	MGI	-	-	5	P1	-	ENSMUSP00000120413	-	F6VKC7	UPI0000D6604F	-	-	-	-	-	-	-	-	-
TpB_UVA_UV574_VEP_ALL.xlsx	TpB	UVA	UV574	5:15472793-15472793	A	intron_variant,non_coding_transcript_variant	MODIFIER	Gm43391	ENSMUSG00000106004	Transcript	ENSMUST00000196145.4	antisense	-	01 of 02	ENSMUST00000196145.4:n.47-235C>A	-	-	-	-	-	-	-	-	1	-	MGI	-	-	5	-	-	-	-	-	-	-	-	-	-	-	-	-	-	-
TpB_UVA_UV574_VEP_ALL.xlsx	TpB	UVA	UV574	5:34552794-34552794	T	missense_variant	MODERATE	Sh3bp2	ENSMUSG00000054520	Transcript	ENSMUST00000067638.13	protein_coding	03 of 13	-	ENSMUST00000067638.13:c.194C>T	ENSMUSP00000070890.7:p.Thr65Ile	254	194	65	T/I	aCa/aTa	-	-	1	-	MGI	-	-	1	P3	CCDS19215.1	ENSMUSP00000070890	-	Q5U3L0	UPI0000020B1F	deleterious(0.03)	-	-	-	-	-	-	-	-
TpB_UVA_UV574_VEP_ALL.xlsx	TpB	UVA	UV574	5:34552794-34552794	T	downstream_gene_variant	MODIFIER	Sh3bp2	ENSMUSG00000054520	Transcript	ENSMUST00000125817.7	protein_coding	-	-	-	-	-	-	-	-	-	-	1094	1	cds_end_NF	MGI	-	-	2	-	-	ENSMUSP00000123177	-	D3Z107	UPI000161182C	-	-	-	-	-	-	-	-	-
TpB_UVA_UV574_VEP_ALL.xlsx	TpB	UVA	UV574	5:72282239-72282239	T	missense_variant	MODERATE	Atp10d	ENSMUSG00000046808	Transcript	ENSMUST00000094710.7	protein_coding	02 of 07	-	ENSMUST00000094710.7:c.78G>T	ENSMUSP00000142749.1:p.Glu26Asp	209	78	26	E/D	gaG/gaT	-	-	1	-	MGI	-	-	5	P1	-	ENSMUSP00000142749	-	A0A0G2JEF2	UPI0000193CF1	tolerated(1)	-	-	-	-	-	-	-	-
TpB_UVA_UV574_VEP_ALL.xlsx	TpB	UVA	UV574	5:72282239-72282239	T	non_coding_transcript_exon_variant	MODIFIER	Atp10d	ENSMUSG00000046808	Transcript	ENSMUST00000136350.7	processed_transcript	08 of 12	-	ENSMUST00000136350.7:n.1200G>T	-	1200	-	-	-	-	-	-	1	-	MGI	-	-	1	-	-	-	-	-	-	-	-	-	-	-	-	-	-	-
TpB_UVA_UV574_VEP_ALL.xlsx	TpB	UVA	UV574	5:72282240-72282240	C	missense_variant	MODERATE	Atp10d	ENSMUSG00000046808	Transcript	ENSMUST00000094710.7	protein_coding	02 of 07	-	ENSMUST00000094710.7:c.79A>C	ENSMUSP00000142749.1:p.Lys27Gln	210	79	27	K/Q	Aaa/Caa	-	-	1	-	MGI	-	-	5	P1	-	ENSMUSP00000142749	-	A0A0G2JEF2	UPI0000193CF1	deleterious(0.01)	-	-	-	-	-	-	-	-
TpB_UVA_UV574_VEP_ALL.xlsx	TpB	UVA	UV574	5:72282240-72282240	C	non_coding_transcript_exon_variant	MODIFIER	Atp10d	ENSMUSG00000046808	Transcript	ENSMUST00000136350.7	processed_transcript	08 of 12	-	ENSMUST00000136350.7:n.1201A>C	-	1201	-	-	-	-	-	-	1	-	MGI	-	-	1	-	-	-	-	-	-	-	-	-	-	-	-	-	-	-
TpB_UVA_UV574_VEP_ALL.xlsx	TpB	UVA	UV574	5:72612399-72612399	T	synonymous_variant	LOW	Cnga1	ENSMUSG00000067220	Transcript	ENSMUST00000087213.11	protein_coding	05 of 09	-	ENSMUST00000087213.11:c.276G>A	ENSMUSP00000084464.5:p.Glu92%3D	541	276	92	E	gaG/gaA	-	-	-1	-	MGI	-	-	1	P1	CCDS19333.1	ENSMUSP00000084464	P29974	-	UPI0000023133	-	-	-	-	-	-	-	-	-
TpB_UVA_UV574_VEP_ALL.xlsx	TpB	UVA	UV574	5:72612399-72612399	T	downstream_gene_variant	MODIFIER	Cnga1	ENSMUSG00000067220	Transcript	ENSMUST00000126799.3	protein_coding	-	-	-	-	-	-	-	-	-	-	2735	-1	-	MGI	-	-	1	-	-	ENSMUSP00000143377	-	A0A0G2JG06	UPI0000217BA3	-	-	-	-	-	-	-	-	-
TpB_UVA_UV574_VEP_ALL.xlsx	TpB	UVA	UV574	6:34959615-34959615	T	splice_acceptor_variant	HIGH	Slc23a4	ENSMUSG00000029847	Transcript	ENSMUST00000044387.13	protein_coding	-	02 of 07	ENSMUST00000044387.13:c.-52-1G>A	-	-	-	-	-	-	-	-	-1	-	MGI	-	-	1	-	CCDS19998.1	ENSMUSP00000041436	-	E9PW54	UPI0000563A24	-	-	-	-	-	-	-	-	-
TpB_UVA_UV574_VEP_ALL.xlsx	TpB	UVA	UV574	6:68103505-68103505	C	upstream_gene_variant	MODIFIER	Gm5309	ENSMUSG00000106331	Transcript	ENSMUST00000197416.1	processed_pseudogene	-	-	-	-	-	-	-	-	-	-	39	-1	-	MGI	-	-	-	-	-	-	-	-	-	-	-	-	-	-	-	-	-	-
TpB_UVA_UV574_VEP_ALL.xlsx	TpB	UVA	UV574	7:19277812-19277812	T	upstream_gene_variant	MODIFIER	Rtn2	ENSMUSG00000030401	Transcript	ENSMUST00000032559.16	protein_coding	-	-	-	-	-	-	-	-	-	-	4812	1	-	MGI	-	-	1	P3	CCDS20896.1	ENSMUSP00000032559	O70622	Q6IM75	UPI000000151A	-	-	-	-	-	-	-	-	-
TpB_UVA_UV574_VEP_ALL.xlsx	TpB	UVA	UV574	7:43572507-43572507	T	intron_variant	MODIFIER	Zfp658	ENSMUSG00000056592	Transcript	ENSMUST00000005597.8	protein_coding	-	03 of 03	ENSMUST00000005597.8:c.287-82C>T	-	-	-	-	-	-	-	-	1	-	MGI	-	-	1	P1	CCDS39931.1	ENSMUSP00000005597	-	Q5PPQ4	UPI0000428DE2	-	-	-	-	-	-	-	-	-
TpB_UVA_UV574_VEP_ALL.xlsx	TpB	UVA	UV574	7:45194437-45194437	A	intron_variant	MODIFIER	Ccdc155	ENSMUSG00000038292	Transcript	ENSMUST00000121017.4	protein_coding	-	05 of 19	ENSMUST00000121017.4:c.611-21C>T	-	-	-	-	-	-	-	-	-1	-	MGI	-	-	1	P1	CCDS21234.2	ENSMUSP00000113616	Q80VJ8	-	UPI00001F4A21	-	-	-	-	-	-	-	-	-
TpB_UVA_UV574_VEP_ALL.xlsx	TpB	UVA	UV574	7:130897370-130897370	T	missense_variant	MODERATE	Plekha1	ENSMUSG00000040268	Transcript	ENSMUST00000048180.11	protein_coding	04 of 10	-	ENSMUST00000048180.11:c.244C>T	ENSMUSP00000035375.5:p.Arg82Cys	338	244	82	R/C	Cgc/Tgc	-	-	1	-	MGI	-	-	1	-	CCDS21907.1	ENSMUSP00000035375	Q8BUL6	-	UPI0000026A91	deleterious(0.04)	-	-	-	-	-	-	-	-
TpB_UVA_UV574_VEP_ALL.xlsx	TpB	UVA	UV574	7:130897370-130897370	T	intron_variant	MODIFIER	Fgfr2	ENSMUSG00000030849	Transcript	ENSMUST00000124096.7	protein_coding	-	02 of 06	ENSMUST00000124096.7:c.-54-724431G>A	-	-	-	-	-	-	-	-	-1	-	MGI	-	-	5	-	-	ENSMUSP00000130971	-	F2Z480	UPI000066301C	-	-	-	-	-	-	-	-	-
TpB_UVA_UV574_VEP_ALL.xlsx	TpB	UVA	UV574	8:19697778-19697778	T	downstream_gene_variant	MODIFIER	Gm6483	ENSMUSG00000087153	Transcript	ENSMUST00000155660.8	unprocessed_pseudogene	-	-	-	-	-	-	-	-	-	-	42	1	-	MGI	-	-	-	-	-	-	-	-	-	-	-	-	-	-	-	-	-	-
TpB_UVA_UV574_VEP_ALL.xlsx	TpB	UVA	UV574	8:97566322-97566322	T	non_coding_transcript_exon_variant	MODIFIER	Gm7191	ENSMUSG00000098116	Transcript	ENSMUST00000182678.1	processed_pseudogene	01 of 01	-	ENSMUST00000182678.1:n.271G>A	-	271	-	-	-	-	-	-	-1	-	MGI	-	-	-	-	-	-	-	-	-	-	-	-	-	-	-	-	-	-
TpB_UVA_UV574_VEP_ALL.xlsx	TpB	UVA	UV574	8:119454481-119454481	T	intron_variant	MODIFIER	Necab2	ENSMUSG00000031837	Transcript	ENSMUST00000098363.9	protein_coding	-	05 of 12	ENSMUST00000098363.9:c.468+25C>T	-	-	-	-	-	-	-	-	1	-	MGI	-	-	1	P1	CCDS22705.1	ENSMUSP00000095966	Q91ZP9	-	UPI0000029866	-	-	-	-	-	-	-	-	-
TpB_UVA_UV574_VEP_ALL.xlsx	TpB	UVA	UV574	9:4432748-4432748	T	intron_variant	MODIFIER	Gria4	ENSMUSG00000025892	Transcript	ENSMUST00000027020.12	protein_coding	-	15 of 16	ENSMUST00000027020.12:c.2409+25G>A	-	-	-	-	-	-	-	-	-1	-	MGI	-	-	5	A1	CCDS52715.1	ENSMUSP00000027020	-	G5E863	UPI000002272A	-	-	-	-	-	-	-	-	-
TpB_UVA_UV574_VEP_ALL.xlsx	TpB	UVA	UV574	9:39550238-39550238	T	missense_variant	MODERATE	Olfr958	ENSMUSG00000050853	Transcript	ENSMUST00000062545.2	protein_coding	01 of 01	-	ENSMUST00000062545.2:c.632T>A	ENSMUSP00000049930.2:p.Phe211Tyr	632	632	211	F/Y	tTt/tAt	-	-	-1	-	MGI	-	-	-	P1	CCDS23050.1	ENSMUSP00000049930	Q8VEY3	-	UPI0000028F5C	deleterious(0)	-	-	-	-	-	-	-	-
TpB_UVA_UV574_VEP_ALL.xlsx	TpB	UVA	UV574	9:119670027-119670027	A	intron_variant	MODIFIER	Scn10a	ENSMUSG00000034533	Transcript	ENSMUST00000084787.5	protein_coding	-	07 of 27	ENSMUST00000084787.5:c.884-10C>T	-	-	-	-	-	-	-	-	-1	-	MGI	-	-	5	P2	CCDS57716.1	ENSMUSP00000081845	-	K3W4P8	UPI0000D8B320	-	-	-	-	-	-	-	-	-
TpB_UVA_UV574_VEP_ALL.xlsx	TpB	UVA	UV574	X:169987429-169987429	T	intron_variant	MODIFIER	Mid1	ENSMUSG00000035299	Transcript	ENSMUST00000036753.11	protein_coding	-	08 of 09	ENSMUST00000036753.11:c.1487-130C>T	-	-	-	-	-	-	-	-	1	-	MGI	-	-	5	P1	CCDS41215.1	ENSMUSP00000038765	O70583	-	UPI000019349A	-	-	-	-	-	-	-	-	-
TpB_UVA_UV574_VEP_ALL.xlsx	TpB	UVA	UV574	Y:4005575-4005575	G	non_coding_transcript_exon_variant	MODIFIER	Vmn2r-ps139	ENSMUSG00000101499	Transcript	ENSMUST00000190764.1	unprocessed_pseudogene	01 of 04	-	ENSMUST00000190764.1:n.412A>G	-	412	-	-	-	-	-	-	1	-	MGI	-	-	-	-	-	-	-	-	-	-	-	-	-	-	-	-	-	-
TpB_UVA_UV574_VEP_ALL.xlsx	TpB	UVA	UV574	Y:4014429-4014429	C	non_coding_transcript_exon_variant	MODIFIER	Vmn2r-ps139	ENSMUSG00000101499	Transcript	ENSMUST00000190764.1	unprocessed_pseudogene	03 of 04	-	ENSMUST00000190764.1:n.1043T>C	-	1043	-	-	-	-	-	-	1	-	MGI	-	-	-	-	-	-	-	-	-	-	-	-	-	-	-	-	-	-
TpB_UVA_UV574_VEP_ALL.xlsx	TpB	UVA	UV574	Y:4014432-4014432	C	non_coding_transcript_exon_variant	MODIFIER	Vmn2r-ps139	ENSMUSG00000101499	Transcript	ENSMUST00000190764.1	unprocessed_pseudogene	03 of 04	-	ENSMUST00000190764.1:n.1046T>C	-	1046	-	-	-	-	-	-	1	-	MGI	-	-	-	-	-	-	-	-	-	-	-	-	-	-	-	-	-	-
TpB_UVA_UV574_VEP_ALL.xlsx	TpB	UVA	UV574	Y:90761322-90761322	A	intron_variant,non_coding_transcript_variant	MODIFIER	Mid1-ps1	ENSMUSG00000095134	Transcript	ENSMUST00000167967.3	unprocessed_pseudogene	-	05 of 06	ENSMUST00000167967.3:n.691+708G>A	-	-	-	-	-	-	-	-	1	-	MGI	-	-	-	-	-	-	-	-	-	-	-	-	-	-	-	-	-	-
TpB_UVB_BPS1_VEP_ALL.xlsx	TpB	UVB	BPS1	1:4841028-4841028	T	synonymous_variant	LOW	Lypla1	ENSMUSG00000025903	Transcript	ENSMUST00000027036.10	protein_coding	08 of 09	-	ENSMUST00000027036.10:c.535C>T	ENSMUSP00000027036.4:p.Leu179%3D	626	535	179	L	Cta/Tta	-	-	1	-	MGI	-	-	1	P1	CCDS14806.1	ENSMUSP00000027036	P97823	-	UPI0000022735	-	-	-	-	-	-	-	-	-
TpB_UVB_BPS1_VEP_ALL.xlsx	TpB	UVB	BPS1	1:4841028-4841028	T	intron_variant	MODIFIER	Lypla1	ENSMUSG00000025903	Transcript	ENSMUST00000119612.8	protein_coding	-	05 of 06	ENSMUST00000119612.8:c.274-79C>T	-	-	-	-	-	-	-	-	1	-	MGI	-	-	3	-	-	ENSMUSP00000137647	-	J3QQ63	UPI000268B569	-	-	-	-	-	-	-	-	-
TpB_UVB_BPS1_VEP_ALL.xlsx	TpB	UVB	BPS1	1:7257525-7257525	A	intergenic_variant	MODIFIER	-	-	-	-	-	-	-	-	-	-	-	-	-	-	-	-	-	-	-	-	-	-	-	-	-	-	-	-	-	-	-	-	-	-	-	-	-
TpB_UVB_BPS1_VEP_ALL.xlsx	TpB	UVB	BPS1	1:11101059-11101059	C	splice_region_variant,intron_variant	LOW	Prex2	ENSMUSG00000048960	Transcript	ENSMUST00000027056.11	protein_coding	-	07 of 01	ENSMUST00000027056.11:c.816-5T>C	-	-	-	-	-	-	-	-	1	-	MGI	-	-	1	P1	CCDS48217.1	ENSMUSP00000027056	Q3LAC4	-	UPI0000D8ABA7	-	-	-	-	-	-	-	-	-
TpB_UVB_BPS1_VEP_ALL.xlsx	TpB	UVB	BPS1	1:11160262-11160262	T	synonymous_variant	LOW	Prex2	ENSMUSG00000048960	Transcript	ENSMUST00000027056.11	protein_coding	22 of 40	-	ENSMUST00000027056.11:c.2511C>T	ENSMUSP00000027056.5:p.Phe837%3D	2839	2511	837	F	ttC/ttT	-	-	1	-	MGI	-	-	1	P1	CCDS48217.1	ENSMUSP00000027056	Q3LAC4	-	UPI0000D8ABA7	-	-	-	-	-	-	-	-	-
TpB_UVB_BPS1_VEP_ALL.xlsx	TpB	UVB	BPS1	1:11160262-11160262	T	non_coding_transcript_exon_variant	MODIFIER	Prex2	ENSMUSG00000048960	Transcript	ENSMUST00000187694.1	retained_intron	05 of 05	-	ENSMUST00000187694.1:n.2615C>T	-	2615	-	-	-	-	-	-	1	-	MGI	-	-	1	-	-	-	-	-	-	-	-	-	-	-	-	-	-	-
TpB_UVB_BPS1_VEP_ALL.xlsx	TpB	UVB	BPS1	1:12747910-12747910	C	intron_variant	MODIFIER	Sulf1	ENSMUSG00000016918	Transcript	ENSMUST00000088585.9	protein_coding	-	02 of 21	ENSMUST00000088585.9:c.-133+19222T>C	-	-	-	-	-	-	-	-	1	-	MGI	-	-	1	P1	CCDS14820.1	ENSMUSP00000085949	Q8K007	-	UPI0000027F92	-	-	-	-	-	-	-	-	-
TpB_UVB_BPS1_VEP_ALL.xlsx	TpB	UVB	BPS1	1:13221277-13221277	A	intron_variant	MODIFIER	Ncoa2	ENSMUSG00000005886	Transcript	ENSMUST00000006037.12	protein_coding	-	04 of 22	ENSMUST00000006037.12:c.259+30C>T	-	-	-	-	-	-	-	-	-1	-	MGI	-	-	1	P4	CCDS35515.1	ENSMUSP00000006037	Q61026	-	UPI00001C20C2	-	-	-	-	-	-	-	-	-
TpB_UVB_BPS1_VEP_ALL.xlsx	TpB	UVB	BPS1	1:18265176-18265176	A	upstream_gene_variant	MODIFIER	Defb41	ENSMUSG00000067773	Transcript	ENSMUST00000088463.1	protein_coding	-	-	-	-	-	-	-	-	-	-	38	-1	-	MGI	-	-	1	-	CCDS48226.1	ENSMUSP00000085811	Q30KP6	-	UPI00000EA1B7	-	-	-	-	-	-	-	-	-
TpB_UVB_BPS1_VEP_ALL.xlsx	TpB	UVB	BPS1	1:20586820-20586820	C	splice_region_variant,intron_variant	LOW	Pkhd1	ENSMUSG00000043760	Transcript	ENSMUST00000088448.11	protein_coding	-	08 of 01	ENSMUST00000088448.11:c.596+4A>G	-	-	-	-	-	-	-	-	-1	-	MGI	-	-	1	P1	CCDS14841.1	ENSMUSP00000085794	-	E9PZ36	UPI0000D8B930	-	-	-	-	-	-	-	-	-
TpB_UVB_BPS1_VEP_ALL.xlsx	TpB	UVB	BPS1	1:25128780-25128780	T	intron_variant	MODIFIER	Adgrb3	ENSMUSG00000033569	Transcript	ENSMUST00000041838.6	protein_coding	-	20 of 29	ENSMUST00000041838.6:c.3035+39G>A	-	-	-	-	-	-	-	-	-1	-	MGI	-	-	1	P1	CCDS14855.1	ENSMUSP00000035612	Q80ZF8	-	UPI00001ECF80	-	-	-	-	-	-	-	-	-
TpB_UVB_BPS1_VEP_ALL.xlsx	TpB	UVB	BPS1	1:34268991-34268991	T	intron_variant	MODIFIER	Dst	ENSMUSG00000026131	Transcript	ENSMUST00000097785.9	protein_coding	-	75 of 97	ENSMUST00000097785.9:c.18729+101C>T	-	-	-	-	-	-	-	-	1	-	MGI	-	-	1	P4	CCDS35534.1	ENSMUSP00000095392	Q91ZU6	-	UPI0000DBD9C1	-	-	-	-	-	-	-	-	-
TpB_UVB_BPS1_VEP_ALL.xlsx	TpB	UVB	BPS1	1:34498605-34498605	T	missense_variant	MODERATE	Prss39	ENSMUSG00000026125	Transcript	ENSMUST00000027299.9	protein_coding	01 of 05	-	ENSMUST00000027299.9:c.149C>T	ENSMUSP00000027299.3:p.Pro50Leu	196	149	50	P/L	cCa/cTa	-	-	1	-	MGI	-	-	1	P1	CCDS14868.1	ENSMUSP00000027299	O70169	-	UPI00000227EA	tolerated(0.09)	-	-	-	-	-	-	-	-
TpB_UVB_BPS1_VEP_ALL.xlsx	TpB	UVB	BPS1	1:36412996-36412996	A	upstream_gene_variant	MODIFIER	Fer1l5	ENSMUSG00000037432	Transcript	ENSMUST00000140452.3	nonsense_mediated_decay	-	-	-	-	-	-	-	-	-	-	3892	1	cds_start_NF	MGI	-	-	1	-	-	ENSMUSP00000144430	-	A0A0J9YV09	UPI00064547CA	-	-	-	-	-	-	-	-	-
TpB_UVB_BPS1_VEP_ALL.xlsx	TpB	UVB	BPS1	1:37157198-37157198	A	intron_variant,NMD_transcript_variant	MODIFIER	Vwa3b	ENSMUSG00000050122	Transcript	ENSMUST00000027289.13	nonsense_mediated_decay	-	17 of 24	ENSMUST00000027289.13:c.*209-135T>A	-	-	-	-	-	-	-	-	1	-	MGI	-	-	5	-	-	ENSMUSP00000027289	-	J9JI28	UPI00053BD670	-	-	-	-	-	-	-	-	-
TpB_UVB_BPS1_VEP_ALL.xlsx	TpB	UVB	BPS1	1:37612338-37612338	C	synonymous_variant	LOW	2010300C02Rik	ENSMUSG00000026090	Transcript	ENSMUST00000160023.5	protein_coding	04 of 04	-	ENSMUST00000160023.5:c.1878C>G	ENSMUSP00000125015.1:p.Ala626%3D	1877	1878	626	A	gcC/gcG	-	-	-1	cds_start_NF	MGI	-	-	1	-	-	ENSMUSP00000125015	-	F7B0R9	UPI000164C5AC	-	-	-	-	-	-	-	-	-
TpB_UVB_BPS1_VEP_ALL.xlsx	TpB	UVB	BPS1	1:37612338-37612338	C	upstream_gene_variant	MODIFIER	4930556I23Rik	ENSMUSG00000089767	Transcript	ENSMUST00000160659.1	antisense	-	-	-	-	-	-	-	-	-	-	1921	1	-	MGI	-	-	1	-	-	-	-	-	-	-	-	-	-	-	-	-	-	-
TpB_UVB_BPS1_VEP_ALL.xlsx	TpB	UVB	BPS1	1:37909828-37909828	A	intron_variant	MODIFIER	Lyg2	ENSMUSG00000061584	Transcript	ENSMUST00000078307.6	protein_coding	-	04 of 05	ENSMUST00000078307.6:c.384+68C>T	-	-	-	-	-	-	-	-	-1	-	MGI	-	-	1	P1	CCDS14897.1	ENSMUSP00000077422	Q3V1I0	-	UPI00001C221C	-	-	-	-	-	-	-	-	-
TpB_UVB_BPS1_VEP_ALL.xlsx	TpB	UVB	BPS1	1:37909834-37909834	A	intron_variant	MODIFIER	Lyg2	ENSMUSG00000061584	Transcript	ENSMUST00000078307.6	protein_coding	-	04 of 05	ENSMUST00000078307.6:c.384+62C>T	-	-	-	-	-	-	-	-	-1	-	MGI	-	-	1	P1	CCDS14897.1	ENSMUSP00000077422	Q3V1I0	-	UPI00001C221C	-	-	-	-	-	-	-	-	-
TpB_UVB_BPS1_VEP_ALL.xlsx	TpB	UVB	BPS1	1:38944135-38944135	C	intron_variant	MODIFIER	Nms	ENSMUSG00000067604	Transcript	ENSMUST00000088029.7	protein_coding	-	05 of 09	ENSMUST00000088029.7:c.261+26A>C	-	-	-	-	-	-	-	-	1	-	MGI	-	-	1	P1	CCDS14902.1	ENSMUSP00000085346	Q5H8A1	A0A250SH12	UPI00004C702F	-	-	-	-	-	-	-	-	-
TpB_UVB_BPS1_VEP_ALL.xlsx	TpB	UVB	BPS1	1:40480803-40480803	C	intron_variant	MODIFIER	Il18r1	ENSMUSG00000026070	Transcript	ENSMUST00000087983.7	protein_coding	-	04 of 11	ENSMUST00000087983.7:c.472-119T>C	-	-	-	-	-	-	-	-	1	-	MGI	-	-	5	P1	CCDS35549.1	ENSMUSP00000085298	Q61098	-	UPI0000027D24	-	-	-	-	-	-	-	-	-
TpB_UVB_BPS1_VEP_ALL.xlsx	TpB	UVB	BPS1	1:43785980-43785980	A	intron_variant,NMD_transcript_variant	MODIFIER	Uxs1	ENSMUSG00000057363	Transcript	ENSMUST00000076997.12	nonsense_mediated_decay	-	06 of 14	ENSMUST00000076997.12:c.*36+4484C>T	-	-	-	-	-	-	-	-	-1	-	MGI	-	-	1	-	-	ENSMUSP00000076259	-	G5E8H4	UPI000154CD9A	-	-	-	-	-	-	-	-	-
TpB_UVB_BPS1_VEP_ALL.xlsx	TpB	UVB	BPS1	1:44013759-44013759	T	missense_variant	MODERATE	Mettl21c	ENSMUSG00000047343	Transcript	ENSMUST00000061421.3	protein_coding	03 of 05	-	ENSMUST00000061421.3:c.97G>A	ENSMUSP00000061229.3:p.Glu33Lys	205	97	33	E/K	Gaa/Aaa	-	-	-1	-	MGI	-	-	1	P1	CCDS14927.1	ENSMUSP00000061229	Q8BLU2	B2RVS5	UPI00000EB3EB	tolerated(0.2)	-	-	-	-	-	-	-	-
TpB_UVB_BPS1_VEP_ALL.xlsx	TpB	UVB	BPS1	1:44013759-44013759	T	non_coding_transcript_exon_variant	MODIFIER	Mettl21c	ENSMUSG00000047343	Transcript	ENSMUST00000159881.1	retained_intron	03 of 03	-	ENSMUST00000159881.1:n.233G>A	-	233	-	-	-	-	-	-	-1	-	MGI	-	-	3	-	-	-	-	-	-	-	-	-	-	-	-	-	-	-
TpB_UVB_BPS1_VEP_ALL.xlsx	TpB	UVB	BPS1	1:45602005-45602005	C	upstream_gene_variant	MODIFIER	Gm8304	ENSMUSG00000100894	Transcript	ENSMUST00000185744.1	processed_pseudogene	-	-	-	-	-	-	-	-	-	-	21	1	-	MGI	-	-	-	-	-	-	-	-	-	-	-	-	-	-	-	-	-	-
TpB_UVB_BPS1_VEP_ALL.xlsx	TpB	UVB	BPS1	1:46340032-46340032	A	intron_variant	MODIFIER	Dnah7b	ENSMUSG00000041144	Transcript	ENSMUST00000069293.9	protein_coding	-	59 of 65	ENSMUST00000069293.9:c.11011-86G>A	-	-	-	-	-	-	-	-	1	-	MGI	-	-	5	P2	CCDS48253.1	ENSMUSP00000068738	-	L7N1Y0	UPI0001553AE4	-	-	-	-	-	-	-	-	-
TpB_UVB_BPS1_VEP_ALL.xlsx	TpB	UVB	BPS1	1:52102811-52102811	T	intron_variant	MODIFIER	Stat4	ENSMUSG00000062939	Transcript	ENSMUST00000027277.6	protein_coding	-	20 of 23	ENSMUST00000027277.6:c.1853-37C>T	-	-	-	-	-	-	-	-	1	-	MGI	-	-	1	P1	CCDS14943.1	ENSMUSP00000027277	-	Q3V157	UPI0000163883	-	-	-	-	-	-	-	-	-
TpB_UVB_BPS1_VEP_ALL.xlsx	TpB	UVB	BPS1	1:53606063-53606063	A	intron_variant	MODIFIER	Dnah7a	ENSMUSG00000096141	Transcript	ENSMUST00000094964.6	protein_coding	-	19 of 65	ENSMUST00000094964.6:c.2892-79C>T	-	-	-	-	-	-	-	-	-1	-	MGI	-	-	5	P1	CCDS56629.1	ENSMUSP00000092571	-	E9Q0T8	UPI000231BBEE	-	-	-	-	-	-	-	-	-
TpB_UVB_BPS1_VEP_ALL.xlsx	TpB	UVB	BPS1	1:53926180-53926180	A	missense_variant	MODERATE	Hecw2	ENSMUSG00000042807	Transcript	ENSMUST00000087659.10	protein_coding	09 of 29	-	ENSMUST00000087659.10:c.1486A>T	ENSMUSP00000084942.4:p.Ile496Phe	1580	1486	496	I/F	Att/Ttt	-	-	-1	-	MGI	-	-	5	P1	CCDS14956.1	ENSMUSP00000084942	Q6I6G8	-	UPI00003B0F1B	tolerated_low_confidence(0.62)	-	-	-	-	-	-	-	-
TpB_UVB_BPS1_VEP_ALL.xlsx	TpB	UVB	BPS1	1:53926180-53926180	A	downstream_gene_variant	MODIFIER	Hecw2	ENSMUSG00000042807	Transcript	ENSMUST00000097741.2	protein_coding	-	-	-	-	-	-	-	-	-	-	4633	-1	-	MGI	-	-	1	-	CCDS14957.1	ENSMUSP00000095348	Q6I6G8	A3KPB7	UPI00001939CC	-	-	-	-	-	-	-	-	-
TpB_UVB_BPS1_VEP_ALL.xlsx	TpB	UVB	BPS1	1:54510090-54510090	G	intron_variant	MODIFIER	Pgap1	ENSMUSG00000073678	Transcript	ENSMUST00000097739.4	protein_coding	-	18 of 26	ENSMUST00000097739.4:c.1729-24T>C	-	-	-	-	-	-	-	-	-1	-	MGI	-	-	5	P1	CCDS48260.1	ENSMUSP00000095346	Q3UUQ7	-	UPI00015528FD	-	-	-	-	-	-	-	-	-
TpB_UVB_BPS1_VEP_ALL.xlsx	TpB	UVB	BPS1	1:54653589-54653589	A	intron_variant	MODIFIER	Ankrd44	ENSMUSG00000052331	Transcript	ENSMUST00000044359.15	protein_coding	-	26 of 27	ENSMUST00000044359.15:c.2885+154C>T	-	-	-	-	-	-	-	-	-1	-	MGI	-	-	5	A2	-	ENSMUSP00000040327	-	E9QNQ2	UPI0000D659B0	-	-	-	-	-	-	-	-	-
TpB_UVB_BPS1_VEP_ALL.xlsx	TpB	UVB	BPS1	1:55061502-55061502	T	intron_variant	MODIFIER	Coq10b	ENSMUSG00000025981	Transcript	ENSMUST00000027125.6	protein_coding	-	02 of 04	ENSMUST00000027125.6:c.266+78A>T	-	-	-	-	-	-	-	-	1	-	MGI	-	-	1	A2	CCDS35568.1	ENSMUSP00000027125	-	A0A0R4J066	UPI000022462F	-	-	-	-	-	-	-	-	-
TpB_UVB_BPS1_VEP_ALL.xlsx	TpB	UVB	BPS1	1:55061504-55061504	T	intron_variant	MODIFIER	Coq10b	ENSMUSG00000025981	Transcript	ENSMUST00000027125.6	protein_coding	-	02 of 04	ENSMUST00000027125.6:c.266+80C>T	-	-	-	-	-	-	-	-	1	-	MGI	-	-	1	A2	CCDS35568.1	ENSMUSP00000027125	-	A0A0R4J066	UPI000022462F	-	-	-	-	-	-	-	-	-
TpB_UVB_BPS1_VEP_ALL.xlsx	TpB	UVB	BPS1	1:55226009-55226009	A	intron_variant	MODIFIER	Rftn2	ENSMUSG00000025978	Transcript	ENSMUST00000027121.14	protein_coding	-	01 of 08	ENSMUST00000027121.14:c.139+112C>T	-	-	-	-	-	-	-	-	-1	-	MGI	-	-	1	P1	CCDS14962.1	ENSMUSP00000027121	Q8CHX7	-	UPI00000E8D02	-	-	-	-	-	-	-	-	-
TpB_UVB_BPS1_VEP_ALL.xlsx	TpB	UVB	BPS1	1:58057394-58057394	T	intron_variant	MODIFIER	Aox1	ENSMUSG00000063558	Transcript	ENSMUST00000001027.6	protein_coding	-	08 of 01	ENSMUST00000001027.6:c.667-20C>T	-	-	-	-	-	-	-	-	1	-	MGI	-	-	1	P1	CCDS35575.1	ENSMUSP00000001027	-	G3X8P9	UPI00001ED236	-	-	-	-	-	-	-	-	-
TpB_UVB_BPS1_VEP_ALL.xlsx	TpB	UVB	BPS1	1:58127687-58127687	A	missense_variant	MODERATE	Aox3	ENSMUSG00000064294	Transcript	ENSMUST00000040999.13	protein_coding	07 of 01	-	ENSMUST00000040999.13:c.568G>A	ENSMUSP00000049391.7:p.Glu190Lys	691	568	190	E/K	Gag/Aag	-	-	1	-	MGI	-	-	1	P1	CCDS14969.1	ENSMUSP00000049391	G3X982	-	UPI0000355D47	tolerated(0.62)	-	-	-	-	-	-	-	-
TpB_UVB_BPS1_VEP_ALL.xlsx	TpB	UVB	BPS1	1:58163601-58163601	C	intron_variant	MODIFIER	Aox3	ENSMUSG00000064294	Transcript	ENSMUST00000040999.13	protein_coding	-	20 of 34	ENSMUST00000040999.13:c.2209+156A>C	-	-	-	-	-	-	-	-	1	-	MGI	-	-	1	P1	CCDS14969.1	ENSMUSP00000049391	G3X982	-	UPI0000355D47	-	-	-	-	-	-	-	-	-
TpB_UVB_BPS1_VEP_ALL.xlsx	TpB	UVB	BPS1	1:58183410-58183410	A	intron_variant	MODIFIER	Aox3	ENSMUSG00000064294	Transcript	ENSMUST00000040999.13	protein_coding	-	30 of 34	ENSMUST00000040999.13:c.3417-56G>A	-	-	-	-	-	-	-	-	1	-	MGI	-	-	1	P1	CCDS14969.1	ENSMUSP00000049391	G3X982	-	UPI0000355D47	-	-	-	-	-	-	-	-	-
TpB_UVB_BPS1_VEP_ALL.xlsx	TpB	UVB	BPS1	1:58240644-58240644	A	intron_variant	MODIFIER	Aox4	ENSMUSG00000038242	Transcript	ENSMUST00000040442.5	protein_coding	-	14 of 34	ENSMUST00000040442.5:c.1455-37G>A	-	-	-	-	-	-	-	-	1	-	MGI	-	-	1	P1	CCDS14970.1	ENSMUSP00000048929	Q3TYQ9	-	UPI0000024E48	-	-	-	-	-	-	-	-	-
TpB_UVB_BPS1_VEP_ALL.xlsx	TpB	UVB	BPS1	1:58667906-58667906	A	intron_variant	MODIFIER	Flacc1	ENSMUSG00000047528	Transcript	ENSMUST00000055313.13	protein_coding	-	09 of 14	ENSMUST00000055313.13:c.679-78C>T	-	-	-	-	-	-	-	-	-1	-	MGI	-	-	1	P3	CCDS35581.1	ENSMUSP00000062497	Q8BVM7	-	UPI00000EA8C8	-	-	-	-	-	-	-	-	-
TpB_UVB_BPS1_VEP_ALL.xlsx	TpB	UVB	BPS1	1:59116003-59116003	T	downstream_gene_variant	MODIFIER	Mpp4	ENSMUSG00000079550	Transcript	ENSMUST00000066374.13	protein_coding	-	-	-	-	-	-	-	-	-	-	4933	-1	-	MGI	-	-	5	A2	-	ENSMUSP00000070711	-	K3W4N9	UPI0000D8ABE7	-	-	-	-	-	-	-	-	-
TpB_UVB_BPS1_VEP_ALL.xlsx	TpB	UVB	BPS1	1:59151782-59151782	A	intron_variant	MODIFIER	Mpp4	ENSMUSG00000079550	Transcript	ENSMUST00000066374.13	protein_coding	-	03 of 21	ENSMUST00000066374.13:c.199-46C>T	-	-	-	-	-	-	-	-	-1	-	MGI	-	-	5	A2	-	ENSMUSP00000070711	-	K3W4N9	UPI0000D8ABE7	-	-	-	-	-	-	-	-	-
TpB_UVB_BPS1_VEP_ALL.xlsx	TpB	UVB	BPS1	1:63062174-63062174	T	missense_variant	MODERATE	Ino80d	ENSMUSG00000040865	Transcript	ENSMUST00000097718.8	protein_coding	09 of 11	-	ENSMUST00000097718.8:c.1292C>A	ENSMUSP00000095325.2:p.Pro431His	2034	1292	431	P/H	cCt/cAt	-	-	-1	-	MGI	-	-	5	-	CCDS35594.1	ENSMUSP00000095325	Q66JY2	B1AT32	UPI0000470505	deleterious(0.05)	-	-	-	-	-	-	-	-
TpB_UVB_BPS1_VEP_ALL.xlsx	TpB	UVB	BPS1	1:63062174-63062174	T	non_coding_transcript_exon_variant	MODIFIER	Ino80d	ENSMUSG00000040865	Transcript	ENSMUST00000188100.1	retained_intron	01 of 01	-	ENSMUST00000188100.1:n.1388C>A	-	1388	-	-	-	-	-	-	-1	-	MGI	-	-	-	-	-	-	-	-	-	-	-	-	-	-	-	-	-	-
TpB_UVB_BPS1_VEP_ALL.xlsx	TpB	UVB	BPS1	1:63062175-63062175	A	missense_variant	MODERATE	Ino80d	ENSMUSG00000040865	Transcript	ENSMUST00000097718.8	protein_coding	09 of 11	-	ENSMUST00000097718.8:c.1291C>T	ENSMUSP00000095325.2:p.Pro431Ser	2033	1291	431	P/S	Cct/Tct	-	-	-1	-	MGI	-	-	5	-	CCDS35594.1	ENSMUSP00000095325	Q66JY2	B1AT32	UPI0000470505	tolerated(0.23)	-	-	-	-	-	-	-	-
TpB_UVB_BPS1_VEP_ALL.xlsx	TpB	UVB	BPS1	1:63062175-63062175	A	non_coding_transcript_exon_variant	MODIFIER	Ino80d	ENSMUSG00000040865	Transcript	ENSMUST00000188100.1	retained_intron	01 of 01	-	ENSMUST00000188100.1:n.1387C>T	-	1387	-	-	-	-	-	-	-1	-	MGI	-	-	-	-	-	-	-	-	-	-	-	-	-	-	-	-	-	-
TpB_UVB_BPS1_VEP_ALL.xlsx	TpB	UVB	BPS1	1:63734532-63734532	A	intron_variant	MODIFIER	Fastkd2	ENSMUSG00000025962	Transcript	ENSMUST00000027103.6	protein_coding	-	02 of 11	ENSMUST00000027103.6:c.736-200G>A	-	-	-	-	-	-	-	-	1	-	MGI	-	-	1	P1	CCDS15001.1	ENSMUSP00000027103	Q922E6	-	UPI00000E9EA9	-	-	-	-	-	-	-	-	-
TpB_UVB_BPS1_VEP_ALL.xlsx	TpB	UVB	BPS1	1:64607931-64607931	A	missense_variant	MODERATE	Mettl21a	ENSMUSG00000025956	Transcript	ENSMUST00000053469.1	protein_coding	03 of 03	-	ENSMUST00000053469.1:c.466C>T	ENSMUSP00000050424.1:p.Leu156Phe	1215	466	156	L/F	Ctt/Ttt	-	-	-1	-	MGI	-	-	1	P1	CCDS15006.1	ENSMUSP00000050424	Q9CQL0	-	UPI000002275F	deleterious(0)	-	-	-	-	-	-	-	-
TpB_UVB_BPS1_VEP_ALL.xlsx	TpB	UVB	BPS1	1:64607931-64607931	A	downstream_gene_variant	MODIFIER	Creb1	ENSMUSG00000025958	Transcript	ENSMUST00000087366.10	protein_coding	-	-	-	-	-	-	-	-	-	-	3383	1	-	MGI	-	-	1	A1	CCDS15005.1	ENSMUSP00000084624	Q01147	Q543W0	UPI0000004066	-	-	-	-	-	-	-	-	-
TpB_UVB_BPS1_VEP_ALL.xlsx	TpB	UVB	BPS1	1:65269796-65269796	A	intron_variant	MODIFIER	Pikfyve	ENSMUSG00000025949	Transcript	ENSMUST00000081154.13	protein_coding	-	37 of 41	ENSMUST00000081154.13:c.5474-77G>A	-	-	-	-	-	-	-	-	1	-	MGI	-	-	1	P3	CCDS35601.1	ENSMUSP00000079926	-	D3Z5N5	UPI0000E445E8	-	-	-	-	-	-	-	-	-
TpB_UVB_BPS1_VEP_ALL.xlsx	TpB	UVB	BPS1	1:66683352-66683352	A	intron_variant	MODIFIER	Unc80	ENSMUSG00000055567	Transcript	ENSMUST00000061620.16	protein_coding	-	60 of 64	ENSMUST00000061620.16:c.9263+65G>A	-	-	-	-	-	-	-	-	1	-	MGI	-	-	1	P1	CCDS48283.1	ENSMUSP00000053692	-	B8XCJ6	UPI00018960AB	-	-	-	-	-	-	-	-	-
TpB_UVB_BPS1_VEP_ALL.xlsx	TpB	UVB	BPS1	1:66723184-66723184	A	downstream_gene_variant	MODIFIER	Rpe	ENSMUSG00000026005	Transcript	ENSMUST00000027157.9	protein_coding	-	-	-	-	-	-	-	-	-	-	3379	1	-	MGI	-	-	1	P1	CCDS15022.1	ENSMUSP00000027157	Q8VEE0	-	UPI0000003F2C	-	-	-	-	-	-	-	-	-
TpB_UVB_BPS1_VEP_ALL.xlsx	TpB	UVB	BPS1	1:68254494-68254494	T	intron_variant	MODIFIER	Erbb4	ENSMUSG00000062209	Transcript	ENSMUST00000119142.7	protein_coding	-	18 of 27	ENSMUST00000119142.7:c.2202+35T>A	-	-	-	-	-	-	-	-	-1	-	MGI	-	-	5	P1	-	ENSMUSP00000112713	Q61527	-	UPI0000D659C0	-	-	-	-	-	-	-	-	-
TpB_UVB_BPS1_VEP_ALL.xlsx	TpB	UVB	BPS1	1:70265108-70265108	A	intron_variant	MODIFIER	Spag16	ENSMUSG00000053153	Transcript	ENSMUST00000065425.11	protein_coding	-	12 of 16	ENSMUST00000065425.11:c.1238+59T>A	-	-	-	-	-	-	-	-	1	-	MGI	-	-	1	P1	CCDS15027.1	ENSMUSP00000069821	Q8K450	-	UPI0000028AE2	-	-	-	-	-	-	-	-	-
TpB_UVB_BPS1_VEP_ALL.xlsx	TpB	UVB	BPS1	1:71282927-71282927	A	missense_variant	MODERATE	Abca12	ENSMUSG00000050296	Transcript	ENSMUST00000087268.6	protein_coding	33 of 53	-	ENSMUST00000087268.6:c.5003C>T	ENSMUSP00000084523.5:p.Ser1668Leu	5331	5003	1668	S/L	tCg/tTg	-	-	-1	-	MGI	-	-	1	P1	CCDS48286.1	ENSMUSP00000084523	-	E9Q876	UPI00019867AC	tolerated(0.39)	-	-	-	-	-	-	-	-
TpB_UVB_BPS1_VEP_ALL.xlsx	TpB	UVB	BPS1	1:71627284-71627284	A	synonymous_variant	LOW	Fn1	ENSMUSG00000026193	Transcript	ENSMUST00000055226.12	protein_coding	18 of 46	-	ENSMUST00000055226.12:c.2589C>T	ENSMUSP00000054499.6:p.Ser863%3D	2782	2589	863	S	tcC/tcT	-	-	-1	-	MGI	-	-	1	P3	CCDS15031.1	ENSMUSP00000054499	P11276	-	UPI00001C213F	-	-	-	-	-	-	-	-	-
TpB_UVB_BPS1_VEP_ALL.xlsx	TpB	UVB	BPS1	1:71627284-71627284	A	downstream_gene_variant	MODIFIER	Fn1	ENSMUSG00000026193	Transcript	ENSMUST00000186613.1	nonsense_mediated_decay	-	-	-	-	-	-	-	-	-	-	2173	-1	cds_start_NF	MGI	-	-	3	-	-	ENSMUSP00000140153	-	A0A087WQE0	UPI0004620EA7	-	-	-	-	-	-	-	-	-
TpB_UVB_BPS1_VEP_ALL.xlsx	TpB	UVB	BPS1	1:73990421-73990421	A	intron_variant	MODIFIER	Tns1	ENSMUSG00000055322	Transcript	ENSMUST00000169786.7	protein_coding	-	11 of 01	ENSMUST00000169786.7:c.921-27C>T	-	-	-	-	-	-	-	-	-1	-	MGI	-	-	5	A2	CCDS78614.1	ENSMUSP00000127715	-	E9Q0S6	UPI0000D659D2	-	-	-	-	-	-	-	-	-
TpB_UVB_BPS1_VEP_ALL.xlsx	TpB	UVB	BPS1	1:74459830-74459830	C	intron_variant	MODIFIER	Usp37	ENSMUSG00000033364	Transcript	ENSMUST00000044260.10	protein_coding	-	16 of 23	ENSMUST00000044260.10:c.1835+1736C>G	-	-	-	-	-	-	-	-	-1	-	MGI	-	-	5	A1	CCDS78616.1	ENSMUSP00000035445	Q8C0R0	-	UPI00001ED450	-	-	-	-	-	-	-	-	-
TpB_UVB_BPS1_VEP_ALL.xlsx	TpB	UVB	BPS1	1:74625938-74625938	A	intron_variant	MODIFIER	Stk36	ENSMUSG00000033276	Transcript	ENSMUST00000087183.10	protein_coding	-	15 of 26	ENSMUST00000087183.10:c.1916-75G>A	-	-	-	-	-	-	-	-	1	-	MGI	-	-	5	P1	CCDS35619.1	ENSMUSP00000084430	Q69ZM6	-	UPI0000530313	-	-	-	-	-	-	-	-	-
TpB_UVB_BPS1_VEP_ALL.xlsx	TpB	UVB	BPS1	1:74892104-74892104	A	intron_variant	MODIFIER	Cryba2	ENSMUSG00000006546	Transcript	ENSMUST00000006721.2	protein_coding	-	02 of 04	ENSMUST00000006721.2:c.162-17C>T	-	-	-	-	-	-	-	-	-1	-	MGI	-	-	1	P1	CCDS15059.1	ENSMUSP00000006721	Q9JJV1	-	UPI0000003F4D	-	-	-	-	-	-	-	-	-
TpB_UVB_BPS1_VEP_ALL.xlsx	TpB	UVB	BPS1	1:74917176-74917176	A	synonymous_variant	LOW	Cfap65	ENSMUSG00000047021	Transcript	ENSMUST00000094844.3	protein_coding	18 of 33	-	ENSMUST00000094844.3:c.3243C>T	ENSMUSP00000092440.3:p.Leu1081%3D	3362	3243	1081	L	ctC/ctT	-	-	-1	-	MGI	-	-	1	P1	CCDS15060.1	ENSMUSP00000092440	Q3V0B4	-	UPI00005AB96A	-	-	-	-	-	-	-	-	-
TpB_UVB_BPS1_VEP_ALL.xlsx	TpB	UVB	BPS1	1:75219139-75219139	A	downstream_gene_variant	MODIFIER	Stk16	ENSMUSG00000026201	Transcript	ENSMUST00000027401.10	protein_coding	-	-	-	-	-	-	-	-	-	-	3533	1	-	MGI	-	-	1	P1	CCDS15067.1	ENSMUSP00000027401	O88697	-	UPI0000001A65	-	-	-	-	-	-	-	-	-
TpB_UVB_BPS1_VEP_ALL.xlsx	TpB	UVB	BPS1	1:75469024-75469024	A	intron_variant	MODIFIER	Asic4	ENSMUSG00000033007	Transcript	ENSMUST00000037708.9	protein_coding	-	01 of 09	ENSMUST00000037708.9:c.583-87G>A	-	-	-	-	-	-	-	-	1	-	MGI	-	-	1	P2	CCDS15073.1	ENSMUSP00000045598	Q7TNS7	-	UPI00001B637E	-	-	-	-	-	-	-	-	-
TpB_UVB_BPS1_VEP_ALL.xlsx	TpB	UVB	BPS1	1:78783075-78783075	A	downstream_gene_variant	MODIFIER	Gm6159	ENSMUSG00000099377	Transcript	ENSMUST00000191249.1	processed_pseudogene	-	-	-	-	-	-	-	-	-	-	61	-1	-	MGI	-	-	-	-	-	-	-	-	-	-	-	-	-	-	-	-	-	-
TpB_UVB_BPS1_VEP_ALL.xlsx	TpB	UVB	BPS1	1:82696639-82696639	T	intron_variant	MODIFIER	Col4a3	ENSMUSG00000079465	Transcript	ENSMUST00000113457.8	protein_coding	-	39 of 51	ENSMUST00000113457.8:c.3413-41C>T	-	-	-	-	-	-	-	-	1	-	MGI	-	-	1	P1	CCDS35631.1	ENSMUSP00000109084	Q9QZS0	-	UPI0000475DA0	-	-	-	-	-	-	-	-	-
TpB_UVB_BPS1_VEP_ALL.xlsx	TpB	UVB	BPS1	1:83290864-83290864	A	intron_variant,non_coding_transcript_variant	MODIFIER	Sphkap	ENSMUSG00000026163	Transcript	ENSMUST00000053075.14	retained_intron	-	05 of 09	ENSMUST00000053075.14:n.533+106C>T	-	-	-	-	-	-	-	-	-1	-	MGI	-	-	1	-	-	-	-	-	-	-	-	-	-	-	-	-	-	-
TpB_UVB_BPS1_VEP_ALL.xlsx	TpB	UVB	BPS1	1:85100855-85100855	T	downstream_gene_variant	MODIFIER	Gm10553	ENSMUSG00000073631	Transcript	ENSMUST00000097669.1	antisense	-	-	-	-	-	-	-	-	-	-	320	1	-	MGI	-	-	-	-	-	-	-	-	-	-	-	-	-	-	-	-	-	-
TpB_UVB_BPS1_VEP_ALL.xlsx	TpB	UVB	BPS1	1:85505861-85505861	T	intron_variant,non_coding_transcript_variant	MODIFIER	Gm2427	ENSMUSG00000101751	Transcript	ENSMUST00000189121.1	unprocessed_pseudogene	-	02 of 08	ENSMUST00000189121.1:n.249-328G>T	-	-	-	-	-	-	-	-	1	-	MGI	-	-	-	-	-	-	-	-	-	-	-	-	-	-	-	-	-	-
TpB_UVB_BPS1_VEP_ALL.xlsx	TpB	UVB	BPS1	1:85666850-85666850	A	intron_variant	MODIFIER	Sp100	ENSMUSG00000026222	Transcript	ENSMUST00000054279.14	protein_coding	-	05 of 11	ENSMUST00000054279.14:c.494-64G>A	-	-	-	-	-	-	-	-	1	-	MGI	-	-	1	-	CCDS83567.1	ENSMUSP00000051705	-	E9Q4Y0	UPI00005645D4	-	-	-	-	-	-	-	-	-
TpB_UVB_BPS1_VEP_ALL.xlsx	TpB	UVB	BPS1	1:86053003-86053003	A	missense_variant	MODERATE	2810459M11Rik	ENSMUSG00000026227	Transcript	ENSMUST00000027429.10	protein_coding	03 of 03	-	ENSMUST00000027429.10:c.775G>A	ENSMUSP00000027429.5:p.Gly259Arg	875	775	259	G/R	Gga/Aga	-	-	1	-	MGI	-	-	1	A2	CCDS78641.1	ENSMUSP00000027429	Q9CYS6	-	UPI0000475E05	deleterious(0)	-	-	-	-	-	-	-	-
TpB_UVB_BPS1_VEP_ALL.xlsx	TpB	UVB	BPS1	1:86053003-86053003	A	regulatory_region_variant	MODIFIER	-	-	RegulatoryFeature	ENSMUSR00000484055	-	-	-	-	-	-	-	-	-	-	-	-	-	-	-	-	-	-	-	-	-	-	-	-	-	-	-	-	-	-	-	-	-
TpB_UVB_BPS1_VEP_ALL.xlsx	TpB	UVB	BPS1	1:87198772-87198772	T	3_prime_UTR_variant	MODIFIER	Chrnd	ENSMUSG00000026251	Transcript	ENSMUST00000073252.8	protein_coding	12 of 12	-	ENSMUST00000073252.8:c.*10G>T	-	1627	-	-	-	-	-	-	1	-	MGI	-	-	1	P1	CCDS15129.1	ENSMUSP00000072983	P02716	Q80VZ5	UPI000002284E	-	-	-	-	-	-	-	-	-
TpB_UVB_BPS1_VEP_ALL.xlsx	TpB	UVB	BPS1	1:87374105-87374105	A	missense_variant	MODERATE	Gigyf2	ENSMUSG00000048000	Transcript	ENSMUST00000027475.14	protein_coding	06 of 29	-	ENSMUST00000027475.14:c.376G>A	ENSMUSP00000027475.8:p.Gly126Arg	573	376	126	G/R	Ggg/Agg	-	-	1	-	MGI	-	-	1	P3	CCDS15133.1	ENSMUSP00000027475	Q6Y7W8	-	UPI000043463B	tolerated(0.24)	-	-	-	-	-	-	-	-
TpB_UVB_BPS1_VEP_ALL.xlsx	TpB	UVB	BPS1	1:87374105-87374105	A	non_coding_transcript_exon_variant	MODIFIER	Gigyf2	ENSMUSG00000048000	Transcript	ENSMUST00000173850.7	processed_transcript	06 of 09	-	ENSMUST00000173850.7:n.528G>A	-	528	-	-	-	-	-	-	1	-	MGI	-	-	5	-	-	-	-	-	-	-	-	-	-	-	-	-	-	-
TpB_UVB_BPS1_VEP_ALL.xlsx	TpB	UVB	BPS1	1:88224570-88224570	T	downstream_gene_variant	MODIFIER	Ugt1a7c	ENSMUSG00000090124	Transcript	ENSMUST00000058237.13	protein_coding	-	-	-	-	-	-	-	-	-	-	4568	1	-	MGI	-	-	1	P3	CCDS15139.1	ENSMUSP00000058683	Q6ZQM8	-	UPI00001957F5	-	-	-	-	-	-	-	-	-
TpB_UVB_BPS1_VEP_ALL.xlsx	TpB	UVB	BPS1	1:90773644-90773644	A	missense_variant	MODERATE	Col6a3	ENSMUSG00000048126	Transcript	ENSMUST00000056925.15	protein_coding	41 of 44	-	ENSMUST00000056925.15:c.9370C>T	ENSMUSP00000057131.9:p.His3124Tyr	9624	9370	3124	H/Y	Cac/Tac	-	-	-1	-	MGI	-	-	5	-	-	ENSMUSP00000057131	-	E9PWQ3	UPI0002747210	deleterious(0.03)	-	-	-	-	-	-	-	-
TpB_UVB_BPS1_VEP_ALL.xlsx	TpB	UVB	BPS1	1:90773644-90773644	A	upstream_gene_variant	MODIFIER	Col6a3	ENSMUSG00000048126	Transcript	ENSMUST00000150769.1	retained_intron	-	-	-	-	-	-	-	-	-	-	429	-1	-	MGI	-	-	2	-	-	-	-	-	-	-	-	-	-	-	-	-	-	-
TpB_UVB_BPS1_VEP_ALL.xlsx	TpB	UVB	BPS1	1:90822145-90822145	A	synonymous_variant	LOW	Col6a3	ENSMUSG00000048126	Transcript	ENSMUST00000056925.15	protein_coding	04 of 01	-	ENSMUST00000056925.15:c.966C>T	ENSMUSP00000057131.9:p.Gly322%3D	1220	966	322	G	ggC/ggT	-	-	-1	-	MGI	-	-	5	-	-	ENSMUSP00000057131	-	E9PWQ3	UPI0002747210	-	-	-	-	-	-	-	-	-
TpB_UVB_BPS1_VEP_ALL.xlsx	TpB	UVB	BPS1	1:90822145-90822145	A	intron_variant	MODIFIER	Col6a3	ENSMUSG00000048126	Transcript	ENSMUST00000097653.10	protein_coding	-	02 of 01	ENSMUST00000097653.10:c.89-5610C>T	-	-	-	-	-	-	-	-	-1	-	MGI	-	-	5	P1	CCDS56640.1	ENSMUSP00000137585	-	J3QQ16	UPI0000F220A2	-	-	-	-	-	-	-	-	-
TpB_UVB_BPS1_VEP_ALL.xlsx	TpB	UVB	BPS1	1:91166743-91166743	A	intron_variant	MODIFIER	Rbm44	ENSMUSG00000070732	Transcript	ENSMUST00000094698.1	protein_coding	-	12 of 15	ENSMUST00000094698.1:c.2487-56G>A	-	-	-	-	-	-	-	-	1	-	MGI	-	-	1	P1	CCDS15157.1	ENSMUSP00000092286	Q3V089	-	UPI00005AB97D	-	-	-	-	-	-	-	-	-
TpB_UVB_BPS1_VEP_ALL.xlsx	TpB	UVB	BPS1	1:92491309-92491309	T	missense_variant	MODERATE	Olfr1415	ENSMUSG00000057464	Transcript	ENSMUST00000071521.2	protein_coding	01 of 01	-	ENSMUST00000071521.2:c.445T>A	ENSMUSP00000084047.1:p.Phe149Ile	445	445	149	F/I	Ttt/Att	-	-	-1	-	MGI	-	-	-	P1	CCDS15169.1	ENSMUSP00000084047	-	Q7TQS4	UPI00001AA6C7	deleterious(0)	-	-	-	-	-	-	-	-
TpB_UVB_BPS1_VEP_ALL.xlsx	TpB	UVB	BPS1	1:92491309-92491309	T	downstream_gene_variant	MODIFIER	Olfr1415	ENSMUSG00000057464	Transcript	ENSMUST00000204766.1	protein_coding	-	-	-	-	-	-	-	-	-	-	65	-1	-	MGI	-	-	3	-	-	ENSMUSP00000144986	-	A0A0N4SV77	UPI0006A69ED7	-	-	-	-	-	-	-	-	-
TpB_UVB_BPS1_VEP_ALL.xlsx	TpB	UVB	BPS1	1:92645297-92645297	A	intron_variant	MODIFIER	Otos	ENSMUSG00000044055	Transcript	ENSMUST00000053144.3	protein_coding	-	03 of 04	ENSMUST00000053144.3:c.58+37C>T	-	-	-	-	-	-	-	-	-1	-	MGI	-	-	1	P1	CCDS35668.1	ENSMUSP00000061683	Q8R448	Q497Y7	UPI0000028414	-	-	-	-	-	-	-	-	-
TpB_UVB_BPS1_VEP_ALL.xlsx	TpB	UVB	BPS1	1:92902660-92902660	A	upstream_gene_variant	MODIFIER	Dusp28	ENSMUSG00000047067	Transcript	ENSMUST00000060913.7	protein_coding	-	-	-	-	-	-	-	-	-	-	4321	1	-	MGI	-	-	1	P1	CCDS15179.1	ENSMUSP00000057690	Q8BTR5	-	UPI0000037B06	-	-	-	-	-	-	-	-	-
TpB_UVB_BPS1_VEP_ALL.xlsx	TpB	UVB	BPS1	1:93022438-93022438	A	synonymous_variant	LOW	Kif1a	ENSMUSG00000014602	Transcript	ENSMUST00000086819.11	protein_coding	41 of 47	-	ENSMUST00000086819.11:c.4269C>T	ENSMUSP00000084029.5:p.Ala1423%3D	4269	4269	1423	A	gcC/gcT	-	-	-1	-	MGI	-	-	1	A1	CCDS78652.1	ENSMUSP00000084029	-	Q6TA13	UPI00001DFBB7	-	-	-	-	-	-	-	-	-
TpB_UVB_BPS1_VEP_ALL.xlsx	TpB	UVB	BPS1	1:93022438-93022438	A	3_prime_UTR_variant,NMD_transcript_variant	MODIFIER	Kif1a	ENSMUSG00000014602	Transcript	ENSMUST00000188136.1	nonsense_mediated_decay	04 of 04	-	ENSMUST00000188136.1:c.*324C>T	-	464	-	-	-	-	-	-	-1	cds_start_NF	MGI	-	-	3	-	-	ENSMUSP00000140656	-	A0A087WRJ3	UPI000462119C	-	-	-	-	-	-	-	-	-
TpB_UVB_BPS1_VEP_ALL.xlsx	TpB	UVB	BPS1	1:93135338-93135338	C	missense_variant	MODERATE	Agxt	ENSMUSG00000026272	Transcript	ENSMUST00000027491.6	protein_coding	01 of 11	-	ENSMUST00000027491.6:c.45A>C	ENSMUSP00000027491.5:p.Arg15Ser	99	45	15	R/S	agA/agC	-	-	1	-	MGI	-	-	1	P1	CCDS15184.1	ENSMUSP00000027491	O35423	-	UPI00000E6DA1	deleterious_low_confidence(0.01)	-	-	-	-	-	-	-	-
TpB_UVB_BPS1_VEP_ALL.xlsx	TpB	UVB	BPS1	1:93135338-93135338	C	upstream_gene_variant	MODIFIER	Agxt	ENSMUSG00000026272	Transcript	ENSMUST00000190603.1	processed_transcript	-	-	-	-	-	-	-	-	-	-	4541	1	-	MGI	-	-	5	-	-	-	-	-	-	-	-	-	-	-	-	-	-	-
TpB_UVB_BPS1_VEP_ALL.xlsx	TpB	UVB	BPS1	1:93140442-93140442	T	intron_variant	MODIFIER	Agxt	ENSMUSG00000026272	Transcript	ENSMUST00000027491.6	protein_coding	-	06 of 10	ENSMUST00000027491.6:c.746+36C>T	-	-	-	-	-	-	-	-	1	-	MGI	-	-	1	P1	CCDS15184.1	ENSMUSP00000027491	O35423	-	UPI00000E6DA1	-	-	-	-	-	-	-	-	-
TpB_UVB_BPS1_VEP_ALL.xlsx	TpB	UVB	BPS1	1:93873934-93873934	T	intron_variant	MODIFIER	Gal3st2	ENSMUSG00000094651	Transcript	ENSMUST00000094663.3	protein_coding	-	03 of 03	ENSMUST00000094663.3:c.372+86C>T	-	-	-	-	-	-	-	-	1	-	MGI	-	-	1	P1	CCDS15197.1	ENSMUSP00000092250	-	A2RTS9	UPI0000D8AC2A	-	-	-	-	-	-	-	-	-
TpB_UVB_BPS1_VEP_ALL.xlsx	TpB	UVB	BPS1	1:97786232-97786232	T	missense_variant	MODERATE	Gin1	ENSMUSG00000026333	Transcript	ENSMUST00000027571.12	protein_coding	07 of 08	-	ENSMUST00000027571.12:c.989C>T	ENSMUSP00000027571.6:p.Pro330Leu	1055	989	330	P/L	cCc/cTc	-	-	1	-	MGI	-	-	1	-	CCDS78662.1	ENSMUSP00000027571	Q8K259	-	UPI00001EDA67	deleterious(0)	-	-	-	-	-	-	-	-
TpB_UVB_BPS1_VEP_ALL.xlsx	TpB	UVB	BPS1	1:97786232-97786232	T	3_prime_UTR_variant,NMD_transcript_variant	MODIFIER	Gin1	ENSMUSG00000026333	Transcript	ENSMUST00000138142.7	nonsense_mediated_decay	06 of 07	-	ENSMUST00000138142.7:c.*819C>T	-	1115	-	-	-	-	-	-	1	-	MGI	-	-	5	-	-	ENSMUSP00000137741	-	M0QWB3	UPI0002A47817	-	-	-	-	-	-	-	-	-
TpB_UVB_BPS1_VEP_ALL.xlsx	TpB	UVB	BPS1	1:98263599-98263599	A	non_coding_transcript_exon_variant	MODIFIER	Gm7952	ENSMUSG00000097608	Transcript	ENSMUST00000180540.1	processed_pseudogene	01 of 01	-	ENSMUST00000180540.1:n.77G>A	-	77	-	-	-	-	-	-	1	-	MGI	-	-	-	-	-	-	-	-	-	-	-	-	-	-	-	-	-	-
TpB_UVB_BPS1_VEP_ALL.xlsx	TpB	UVB	BPS1	1:105588001-105588001	T	missense_variant	MODERATE	Pign	ENSMUSG00000056536	Transcript	ENSMUST00000070699.14	protein_coding	18 of 29	-	ENSMUST00000070699.14:c.1838G>A	ENSMUSP00000069969.8:p.Arg613Lys	1988	1838	613	R/K	aGa/aAa	-	-	-1	-	MGI	-	-	5	-	CCDS15205.1	ENSMUSP00000069969	-	G3X9F1	UPI0000434655	tolerated(0.2)	-	-	-	-	-	-	-	-
TpB_UVB_BPS1_VEP_ALL.xlsx	TpB	UVB	BPS1	1:105826996-105826996	T	synonymous_variant	LOW	Tnfrsf11a	ENSMUSG00000026321	Transcript	ENSMUST00000027559.7	protein_coding	09 of 10	-	ENSMUST00000027559.7:c.792C>T	ENSMUSP00000027559.6:p.Ser264%3D	826	792	264	S	tcC/tcT	-	-	1	-	MGI	-	-	1	P1	CCDS15207.1	ENSMUSP00000027559	O35305	-	UPI00000295F2	-	-	-	-	-	-	-	-	-
TpB_UVB_BPS1_VEP_ALL.xlsx	TpB	UVB	BPS1	1:105826996-105826996	T	downstream_gene_variant	MODIFIER	Tnfrsf11a	ENSMUSG00000026321	Transcript	ENSMUST00000187658.1	retained_intron	-	-	-	-	-	-	-	-	-	-	1595	1	-	MGI	-	-	5	-	-	-	-	-	-	-	-	-	-	-	-	-	-	-
TpB_UVB_BPS1_VEP_ALL.xlsx	TpB	UVB	BPS1	1:109994163-109994163	G	5_prime_UTR_variant	MODIFIER	Cdh7	ENSMUSG00000026312	Transcript	ENSMUST00000027542.12	protein_coding	01 of 11	-	ENSMUST00000027542.12:c.-17A>G	-	182	-	-	-	-	-	-	1	-	MGI	-	-	1	P1	CCDS15221.1	ENSMUSP00000027542	Q8BM92	-	UPI000002287D	-	-	-	-	-	-	-	-	-
TpB_UVB_BPS1_VEP_ALL.xlsx	TpB	UVB	BPS1	1:110138120-110138120	A	missense_variant	MODERATE	Cdh7	ENSMUSG00000026312	Transcript	ENSMUST00000027542.12	protein_coding	11 of 11	-	ENSMUST00000027542.12:c.2123G>A	ENSMUSP00000027542.6:p.Arg708Lys	2321	2123	708	R/K	aGg/aAg	-	-	1	-	MGI	-	-	1	P1	CCDS15221.1	ENSMUSP00000027542	Q8BM92	-	UPI000002287D	tolerated(0.09)	-	-	-	-	-	-	-	-
TpB_UVB_BPS1_VEP_ALL.xlsx	TpB	UVB	BPS1	1:110138120-110138120	A	3_prime_UTR_variant,NMD_transcript_variant	MODIFIER	Cdh7	ENSMUSG00000026312	Transcript	ENSMUST00000131464.7	nonsense_mediated_decay	13 of 13	-	ENSMUST00000131464.7:c.*2057G>A	-	3136	-	-	-	-	-	-	1	-	MGI	-	-	1	-	-	ENSMUSP00000138046	-	M0QWW8	UPI0002A47825	-	-	-	-	-	-	-	-	-
TpB_UVB_BPS1_VEP_ALL.xlsx	TpB	UVB	BPS1	1:110889803-110889803	A	synonymous_variant	LOW	Cdh19	ENSMUSG00000047216	Transcript	ENSMUST00000094626.4	protein_coding	12 of 12	-	ENSMUST00000094626.4:c.2208C>T	ENSMUSP00000092210.3:p.Ser736%3D	2437	2208	736	S	tcC/tcT	-	-	-1	-	MGI	-	-	1	P1	CCDS35687.1	ENSMUSP00000092210	-	E9Q3A7	UPI0000D65A19	-	-	-	-	-	-	-	-	-
TpB_UVB_BPS1_VEP_ALL.xlsx	TpB	UVB	BPS1	1:119605085-119605085	A	intron_variant	MODIFIER	Epb41l5	ENSMUSG00000026383	Transcript	ENSMUST00000027632.13	protein_coding	-	14 of 16	ENSMUST00000027632.13:c.1178+143A>T	-	-	-	-	-	-	-	-	-1	-	MGI	-	-	1	P1	CCDS48339.1	ENSMUSP00000027632	Q8BGS1	-	UPI0000027BE4	-	-	-	-	-	-	-	-	-
TpB_UVB_BPS1_VEP_ALL.xlsx	TpB	UVB	BPS1	1:119930925-119930925	A	missense_variant	MODERATE	Cfap221	ENSMUSG00000036962	Transcript	ENSMUST00000037840.11	protein_coding	20 of 23	-	ENSMUST00000037840.11:c.2177C>T	ENSMUSP00000037703.5:p.Ser726Phe	2177	2177	726	S/F	tCc/tTc	-	-	-1	-	MGI	-	-	1	P1	CCDS48340.1	ENSMUSP00000037703	A9Q751	-	UPI00001E2E9A	deleterious(0.04)	-	-	-	-	-	-	-	-
TpB_UVB_BPS1_VEP_ALL.xlsx	TpB	UVB	BPS1	1:127745901-127745901	A	intron_variant	MODIFIER	Acmsd	ENSMUSG00000026348	Transcript	ENSMUST00000038006.7	protein_coding	-	04 of 09	ENSMUST00000038006.7:c.249+76G>A	-	-	-	-	-	-	-	-	1	-	MGI	-	-	1	P1	CCDS15247.1	ENSMUSP00000048482	Q8R519	-	UPI000024E196	-	-	-	-	-	-	-	-	-
TpB_UVB_BPS1_VEP_ALL.xlsx	TpB	UVB	BPS1	1:130804700-130804700	T	intron_variant	MODIFIER	Fcamr	ENSMUSG00000026415	Transcript	ENSMUST00000027670.3	protein_coding	-	03 of 06	ENSMUST00000027670.3:c.238+17C>T	-	-	-	-	-	-	-	-	1	-	MGI	-	-	1	P3	CCDS15259.1	ENSMUSP00000027670	Q2TB54	-	UPI00000228CA	-	-	-	-	-	-	-	-	-
TpB_UVB_BPS1_VEP_ALL.xlsx	TpB	UVB	BPS1	1:130877667-130877667	G	intron_variant	MODIFIER	Fcmr	ENSMUSG00000042474	Transcript	ENSMUST00000038829.6	protein_coding	-	04 of 07	ENSMUST00000038829.6:c.723-86A>G	-	-	-	-	-	-	-	-	1	-	MGI	-	-	1	P1	CCDS15261.1	ENSMUSP00000048303	-	A0A0G2LB91	UPI000002486B	-	-	-	-	-	-	-	-	-
TpB_UVB_BPS1_VEP_ALL.xlsx	TpB	UVB	BPS1	1:131767704-131767704	C	intron_variant	MODIFIER	Slc26a9	ENSMUSG00000042268	Transcript	ENSMUST00000049027.9	protein_coding	-	19 of 20	ENSMUST00000049027.9:c.2254-105A>C	-	-	-	-	-	-	-	-	1	-	MGI	-	-	1	P1	CCDS15273.1	ENSMUSP00000036916	-	A0A0R4J0F7	UPI0000026DAC	-	-	-	-	-	-	-	-	-
TpB_UVB_BPS1_VEP_ALL.xlsx	TpB	UVB	BPS1	1:131801899-131801899	A	intron_variant	MODIFIER	Pm20d1	ENSMUSG00000042251	Transcript	ENSMUST00000048660.11	protein_coding	-	04 of 13	ENSMUST00000048660.11:c.576+87G>A	-	-	-	-	-	-	-	-	1	-	MGI	-	-	1	P1	CCDS15274.1	ENSMUSP00000046079	Q8C165	-	UPI00000EA20E	-	-	-	-	-	-	-	-	-
TpB_UVB_BPS1_VEP_ALL.xlsx	TpB	UVB	BPS1	1:133682989-133682989	T	synonymous_variant	LOW	Lax1	ENSMUSG00000051998	Transcript	ENSMUST00000169295.7	protein_coding	05 of 06	-	ENSMUST00000169295.7:c.360G>A	ENSMUSP00000131126.1:p.Glu120%3D	758	360	120	E	gaG/gaA	-	-	-1	-	MGI	-	-	1	P1	CCDS35711.1	ENSMUSP00000131126	Q8BHB3	-	UPI00000E8E41	-	-	-	-	-	-	-	-	-
TpB_UVB_BPS1_VEP_ALL.xlsx	TpB	UVB	BPS1	1:133682989-133682989	T	intron_variant	MODIFIER	Lax1	ENSMUSG00000051998	Transcript	ENSMUST00000189524.1	protein_coding	-	02 of 02	ENSMUST00000189524.1:c.87-2354G>A	-	-	-	-	-	-	-	-	-1	-	MGI	-	-	2	-	-	ENSMUSP00000140039	-	A0A087WQ47	UPI00046210EC	-	-	-	-	-	-	-	-	-
TpB_UVB_BPS1_VEP_ALL.xlsx	TpB	UVB	BPS1	1:133682991-133682991	T	missense_variant	MODERATE	Lax1	ENSMUSG00000051998	Transcript	ENSMUST00000169295.7	protein_coding	05 of 06	-	ENSMUST00000169295.7:c.358G>A	ENSMUSP00000131126.1:p.Glu120Lys	756	358	120	E/K	Gag/Aag	-	-	-1	-	MGI	-	-	1	P1	CCDS35711.1	ENSMUSP00000131126	Q8BHB3	-	UPI00000E8E41	tolerated(0.58)	-	-	-	-	-	-	-	-
TpB_UVB_BPS1_VEP_ALL.xlsx	TpB	UVB	BPS1	1:133682991-133682991	T	intron_variant	MODIFIER	Lax1	ENSMUSG00000051998	Transcript	ENSMUST00000189524.1	protein_coding	-	02 of 02	ENSMUST00000189524.1:c.87-2356G>A	-	-	-	-	-	-	-	-	-1	-	MGI	-	-	2	-	-	ENSMUSP00000140039	-	A0A087WQ47	UPI00046210EC	-	-	-	-	-	-	-	-	-
TpB_UVB_BPS1_VEP_ALL.xlsx	TpB	UVB	BPS1	1:133914304-133914304	A	intron_variant	MODIFIER	Prelp	ENSMUSG00000041577	Transcript	ENSMUST00000048432.5	protein_coding	-	02 of 02	ENSMUST00000048432.5:c.961+141C>T	-	-	-	-	-	-	-	-	-1	-	MGI	-	-	1	P1	CCDS15300.1	ENSMUSP00000048803	Q9JK53	Q543S0	UPI0000004088	-	-	-	-	-	-	-	-	-
TpB_UVB_BPS1_VEP_ALL.xlsx	TpB	UVB	BPS1	1:134146653-134146653	C	missense_variant	MODERATE	Chit1	ENSMUSG00000026450	Transcript	ENSMUST00000086475.2	protein_coding	07 of 11	-	ENSMUST00000086475.2:c.697G>C	ENSMUSP00000083666.2:p.Gly233Arg	799	697	233	G/R	Gga/Cga	-	-	1	-	MGI	-	-	1	P1	CCDS15304.1	ENSMUSP00000083666	Q9D7Q1	B2RS82	UPI00001E2EA7	tolerated(0.41)	-	-	-	-	-	-	-	-
TpB_UVB_BPS1_VEP_ALL.xlsx	TpB	UVB	BPS1	1:134182773-134182773	A	splice_region_variant,intron_variant	LOW	Chil1	ENSMUSG00000064246	Transcript	ENSMUST00000082060.9	protein_coding	-	01 of 09	ENSMUST00000082060.9:c.50-7C>A	-	-	-	-	-	-	-	-	1	-	MGI	-	-	1	P2	CCDS48368.1	ENSMUSP00000080717	Q61362	-	UPI00000EB56D	-	-	-	-	-	-	-	-	-
TpB_UVB_BPS1_VEP_ALL.xlsx	TpB	UVB	BPS1	1:134182774-134182774	T	splice_region_variant,intron_variant	LOW	Chil1	ENSMUSG00000064246	Transcript	ENSMUST00000082060.9	protein_coding	-	01 of 09	ENSMUST00000082060.9:c.50-6C>T	-	-	-	-	-	-	-	-	1	-	MGI	-	-	1	P2	CCDS48368.1	ENSMUSP00000080717	Q61362	-	UPI00000EB56D	-	-	-	-	-	-	-	-	-
TpB_UVB_BPS1_VEP_ALL.xlsx	TpB	UVB	BPS1	1:134199675-134199675	T	downstream_gene_variant	MODIFIER	Adora1	ENSMUSG00000042429	Transcript	ENSMUST00000038191.7	protein_coding	-	-	-	-	-	-	-	-	-	-	1674	-1	-	MGI	-	-	1	P1	CCDS15305.1	ENSMUSP00000043522	Q60612	-	UPI0000024613	-	-	-	-	-	-	-	-	-
TpB_UVB_BPS1_VEP_ALL.xlsx	TpB	UVB	BPS1	1:135134832-135134832	G	missense_variant,splice_region_variant	MODERATE	Ptpn7	ENSMUSG00000031506	Transcript	ENSMUST00000049449.10	protein_coding	04 of 10	-	ENSMUST00000049449.10:c.308A>G	ENSMUSP00000045803.4:p.Lys103Arg	426	308	103	K/R	aAg/aGg	-	-	1	-	MGI	-	-	1	P1	CCDS15315.1	ENSMUSP00000045803	Q8BUM3	-	UPI00000EAA04	tolerated(0.05)	-	-	-	-	-	-	-	-
TpB_UVB_BPS1_VEP_ALL.xlsx	TpB	UVB	BPS1	1:135134832-135134832	G	upstream_gene_variant	MODIFIER	Ptprv	ENSMUSG00000097993	Transcript	ENSMUST00000182541.7	processed_transcript	-	-	-	-	-	-	-	-	-	-	2264	-1	-	MGI	-	-	5	-	-	-	-	-	-	-	-	-	-	-	-	-	-	-
TpB_UVB_BPS1_VEP_ALL.xlsx	TpB	UVB	BPS1	1:135389728-135389728	A	intron_variant	MODIFIER	Ipo9	ENSMUSG00000041879	Transcript	ENSMUST00000041023.13	protein_coding	-	17 of 23	ENSMUST00000041023.13:c.2134-140C>T	-	-	-	-	-	-	-	-	-1	-	MGI	-	-	1	P1	CCDS35719.1	ENSMUSP00000036093	-	E9QKZ2	UPI00001E2EAB	-	-	-	-	-	-	-	-	-
TpB_UVB_BPS1_VEP_ALL.xlsx	TpB	UVB	BPS1	1:135877049-135877049	A	intron_variant	MODIFIER	Pkp1	ENSMUSG00000026413	Transcript	ENSMUST00000027667.12	protein_coding	-	12 of 13	ENSMUST00000027667.12:c.2112+22C>T	-	-	-	-	-	-	-	-	-1	-	MGI	-	-	1	P1	CCDS15322.1	ENSMUSP00000027667	P97350	-	UPI0000028D2A	-	-	-	-	-	-	-	-	-
TpB_UVB_BPS1_VEP_ALL.xlsx	TpB	UVB	BPS1	1:136117634-136117634	G	synonymous_variant	LOW	Cacna1s	ENSMUSG00000026407	Transcript	ENSMUST00000112064.7	protein_coding	41 of 44	-	ENSMUST00000112064.7:c.5076A>G	ENSMUSP00000107695.1:p.Gly1692%3D	5076	5076	1692	G	ggA/ggG	-	-	1	-	MGI	-	-	2	P3	CCDS35724.1	ENSMUSP00000107695	-	F8VQE0	UPI0000D65A2C	-	-	-	-	-	-	-	-	-
TpB_UVB_BPS1_VEP_ALL.xlsx	TpB	UVB	BPS1	1:136117634-136117634	G	non_coding_transcript_exon_variant	MODIFIER	Cacna1s	ENSMUSG00000026407	Transcript	ENSMUST00000159106.1	processed_transcript	02 of 05	-	ENSMUST00000159106.1:n.125A>G	-	125	-	-	-	-	-	-	1	-	MGI	-	-	2	-	-	-	-	-	-	-	-	-	-	-	-	-	-	-
TpB_UVB_BPS1_VEP_ALL.xlsx	TpB	UVB	BPS1	1:136510132-136510132	A	intron_variant	MODIFIER	Kif14	ENSMUSG00000041498	Transcript	ENSMUST00000047817.11	protein_coding	-	21 of 29	ENSMUST00000047817.11:c.3424-13T>A	-	-	-	-	-	-	-	-	1	-	MGI	-	-	5	A2	-	ENSMUSP00000044257	-	E9Q3T3	UPI0000D65A33	-	-	-	-	-	-	-	-	-
TpB_UVB_BPS1_VEP_ALL.xlsx	TpB	UVB	BPS1	1:136627465-136627465	T	missense_variant	MODERATE	Zfp281	ENSMUSG00000041483	Transcript	ENSMUST00000047734.14	protein_coding	02 of 02	-	ENSMUST00000047734.14:c.2180C>T	ENSMUSP00000039003.8:p.Ser727Phe	2345	2180	727	S/F	tCt/tTt	-	-	1	-	MGI	-	-	1	P1	CCDS15327.1	ENSMUSP00000039003	Q99LI5	-	UPI0000027C94	deleterious(0.01)	-	-	-	-	-	-	-	-
TpB_UVB_BPS1_VEP_ALL.xlsx	TpB	UVB	BPS1	1:136627465-136627465	T	upstream_gene_variant	MODIFIER	Platr23	ENSMUSG00000097229	Transcript	ENSMUST00000180797.1	lincRNA	-	-	-	-	-	-	-	-	-	-	2815	-1	-	MGI	-	-	1	-	-	-	-	-	-	-	-	-	-	-	-	-	-	-
TpB_UVB_BPS1_VEP_ALL.xlsx	TpB	UVB	BPS1	1:139247987-139247987	G	intron_variant	MODIFIER	Crb1	ENSMUSG00000063681	Transcript	ENSMUST00000059825.11	protein_coding	-	06 of 11	ENSMUST00000059825.11:c.2125+132A>C	-	-	-	-	-	-	-	-	-1	-	MGI	-	-	1	P2	CCDS15336.1	ENSMUSP00000060769	Q8VHS2	-	UPI00000228A8	-	-	-	-	-	-	-	-	-
TpB_UVB_BPS1_VEP_ALL.xlsx	TpB	UVB	BPS1	1:139247987-139247987	G	missense_variant	MODERATE	Crb1	ENSMUSG00000063681	Transcript	ENSMUST00000196402.4	protein_coding	06 of 06	-	ENSMUST00000196402.4:c.2257A>C	ENSMUSP00000142702.1:p.Ile753Leu	2388	2257	753	I/L	Ata/Cta	-	-	-1	-	MGI	-	-	1	-	-	ENSMUSP00000142702	Q8VHS2	-	UPI00001ED77B	tolerated_low_confidence(0.8)	-	-	-	-	-	-	-	-
TpB_UVB_BPS1_VEP_ALL.xlsx	TpB	UVB	BPS1	1:140509452-140509452	A	missense_variant	MODERATE	Kcnt2	ENSMUSG00000052726	Transcript	ENSMUST00000119786.7	protein_coding	15 of 27	-	ENSMUST00000119786.7:c.1472G>A	ENSMUSP00000113535.1:p.Arg491Gln	1522	1472	491	R/Q	cGa/cAa	-	-	1	-	MGI	-	-	5	-	-	ENSMUSP00000113535	-	D3Z592	UPI000164C5CE	tolerated(0.12)	-	-	-	-	-	-	-	-
TpB_UVB_BPS1_VEP_ALL.xlsx	TpB	UVB	BPS1	1:140509452-140509452	A	non_coding_transcript_exon_variant	MODIFIER	Kcnt2	ENSMUSG00000052726	Transcript	ENSMUST00000145077.2	processed_transcript	04 of 07	-	ENSMUST00000145077.2:n.669G>A	-	669	-	-	-	-	-	-	1	-	MGI	-	-	1	-	-	-	-	-	-	-	-	-	-	-	-	-	-	-
TpB_UVB_BPS1_VEP_ALL.xlsx	TpB	UVB	BPS1	1:143647934-143647934	G	intron_variant	MODIFIER	Cdc73	ENSMUSG00000026361	Transcript	ENSMUST00000018337.8	protein_coding	-	10 of 16	ENSMUST00000018337.8:c.973-12845T>C	-	-	-	-	-	-	-	-	-1	-	MGI	-	-	1	P1	CCDS15341.1	ENSMUSP00000018337	Q8JZM7	-	UPI0000021592	-	-	-	-	-	-	-	-	-
TpB_UVB_BPS1_VEP_ALL.xlsx	TpB	UVB	BPS1	1:150406569-150406569	T	intron_variant	MODIFIER	Tpr	ENSMUSG00000006005	Transcript	ENSMUST00000119161.8	protein_coding	-	07 of 01	ENSMUST00000119161.8:c.789+15C>T	-	-	-	-	-	-	-	-	1	-	MGI	-	-	5	A2	-	ENSMUSP00000112606	-	Q7M739	UPI000002749F	-	-	-	-	-	-	-	-	-
TpB_UVB_BPS1_VEP_ALL.xlsx	TpB	UVB	BPS1	1:150406571-150406571	A	intron_variant	MODIFIER	Tpr	ENSMUSG00000006005	Transcript	ENSMUST00000119161.8	protein_coding	-	07 of 01	ENSMUST00000119161.8:c.789+17T>A	-	-	-	-	-	-	-	-	1	-	MGI	-	-	5	A2	-	ENSMUSP00000112606	-	Q7M739	UPI000002749F	-	-	-	-	-	-	-	-	-
TpB_UVB_BPS1_VEP_ALL.xlsx	TpB	UVB	BPS1	1:150436782-150436782	A	missense_variant	MODERATE	Tpr	ENSMUSG00000006005	Transcript	ENSMUST00000119161.8	protein_coding	38 of 51	-	ENSMUST00000119161.8:c.5508G>A	ENSMUSP00000112606.2:p.Met1836Ile	5766	5508	1836	M/I	atG/atA	-	-	1	-	MGI	-	-	5	A2	-	ENSMUSP00000112606	-	Q7M739	UPI000002749F	tolerated(0.81)	-	-	-	-	-	-	-	-
TpB_UVB_BPS1_VEP_ALL.xlsx	TpB	UVB	BPS1	1:150436782-150436782	A	upstream_gene_variant	MODIFIER	Tpr	ENSMUSG00000006005	Transcript	ENSMUST00000128417.8	retained_intron	-	-	-	-	-	-	-	-	-	-	3657	1	-	MGI	-	-	5	-	-	-	-	-	-	-	-	-	-	-	-	-	-	-
TpB_UVB_BPS1_VEP_ALL.xlsx	TpB	UVB	BPS1	1:150580270-150580270	A	missense_variant	MODERATE	Hmcn1	ENSMUSG00000066842	Transcript	ENSMUST00000074783.11	protein_coding	103 of 107	-	ENSMUST00000074783.11:c.15898C>T	ENSMUSP00000074340.5:p.Pro5300Ser	15898	15898	5300	P/S	Cca/Tca	-	-	-1	-	MGI	-	-	5	P2	CCDS15357.2	ENSMUSP00000074340	D3YXG0	-	UPI0001598012	deleterious(0.01)	-	-	-	-	-	-	-	-
TpB_UVB_BPS1_VEP_ALL.xlsx	TpB	UVB	BPS1	1:150580270-150580270	A	non_coding_transcript_exon_variant	MODIFIER	Hmcn1	ENSMUSG00000066842	Transcript	ENSMUST00000137909.1	processed_transcript	02 of 03	-	ENSMUST00000137909.1:n.148C>T	-	148	-	-	-	-	-	-	-1	-	MGI	-	-	3	-	-	-	-	-	-	-	-	-	-	-	-	-	-	-
TpB_UVB_BPS1_VEP_ALL.xlsx	TpB	UVB	BPS1	1:150598284-150598284	A	synonymous_variant	LOW	Hmcn1	ENSMUSG00000066842	Transcript	ENSMUST00000074783.11	protein_coding	92 of 107	-	ENSMUST00000074783.11:c.14406C>T	ENSMUSP00000074340.5:p.Ile4802%3D	14406	14406	4802	I	atC/atT	-	-	-1	-	MGI	-	-	5	P2	CCDS15357.2	ENSMUSP00000074340	D3YXG0	-	UPI0001598012	-	-	-	-	-	-	-	-	-
TpB_UVB_BPS1_VEP_ALL.xlsx	TpB	UVB	BPS1	1:150627283-150627283	A	intron_variant	MODIFIER	Hmcn1	ENSMUSG00000066842	Transcript	ENSMUST00000074783.11	protein_coding	-	76 of 106	ENSMUST00000074783.11:c.11681-89C>T	-	-	-	-	-	-	-	-	-1	-	MGI	-	-	5	P2	CCDS15357.2	ENSMUSP00000074340	D3YXG0	-	UPI0001598012	-	-	-	-	-	-	-	-	-
TpB_UVB_BPS1_VEP_ALL.xlsx	TpB	UVB	BPS1	1:150646428-150646428	G	intron_variant	MODIFIER	Hmcn1	ENSMUSG00000066842	Transcript	ENSMUST00000074783.11	protein_coding	-	68 of 106	ENSMUST00000074783.11:c.10570+150T>C	-	-	-	-	-	-	-	-	-1	-	MGI	-	-	5	P2	CCDS15357.2	ENSMUSP00000074340	D3YXG0	-	UPI0001598012	-	-	-	-	-	-	-	-	-
TpB_UVB_BPS1_VEP_ALL.xlsx	TpB	UVB	BPS1	1:150721747-150721747	C	intron_variant	MODIFIER	Hmcn1	ENSMUSG00000066842	Transcript	ENSMUST00000074783.11	protein_coding	-	32 of 106	ENSMUST00000074783.11:c.5189-26T>G	-	-	-	-	-	-	-	-	-1	-	MGI	-	-	5	P2	CCDS15357.2	ENSMUSP00000074340	D3YXG0	-	UPI0001598012	-	-	-	-	-	-	-	-	-
TpB_UVB_BPS1_VEP_ALL.xlsx	TpB	UVB	BPS1	1:152129351-152129351	A	non_coding_transcript_exon_variant	MODIFIER	Gm8964	ENSMUSG00000102090	Transcript	ENSMUST00000165944.2	processed_pseudogene	01 of 01	-	ENSMUST00000165944.2:n.767G>A	-	767	-	-	-	-	-	-	1	-	MGI	-	-	-	-	-	-	-	-	-	-	-	-	-	-	-	-	-	-
TpB_UVB_BPS1_VEP_ALL.xlsx	TpB	UVB	BPS1	1:153332332-153332332	A	missense_variant	MODERATE	Lamc1	ENSMUSG00000026478	Transcript	ENSMUST00000027752.14	protein_coding	01 of 28	-	ENSMUST00000027752.14:c.208C>T	ENSMUSP00000027752.8:p.Pro70Ser	455	208	70	P/S	Ccg/Tcg	-	-	-1	-	MGI	-	-	1	P1	CCDS15370.1	ENSMUSP00000027752	-	F8VQJ3	UPI000024DD4E	deleterious(0.02)	-	-	-	-	-	-	-	-
TpB_UVB_BPS1_VEP_ALL.xlsx	TpB	UVB	BPS1	1:153332332-153332332	A	regulatory_region_variant	MODIFIER	-	-	RegulatoryFeature	ENSMUSR00000014634	-	-	-	-	-	-	-	-	-	-	-	-	-	-	-	-	-	-	-	-	-	-	-	-	-	-	-	-	-	-	-	-	-
TpB_UVB_BPS1_VEP_ALL.xlsx	TpB	UVB	BPS1	1:153781769-153781769	A	missense_variant	MODERATE	Rgsl1	ENSMUSG00000042641	Transcript	ENSMUST00000124558.9	protein_coding	20 of 21	-	ENSMUST00000124558.9:c.3142C>T	ENSMUSP00000135642.1:p.Pro1048Ser	3170	3142	1048	P/S	Cct/Tct	-	-	-1	-	MGI	-	-	5	P2	CCDS56645.1	ENSMUSP00000135642	-	H3BL40	UPI00021BBA06	tolerated_low_confidence(0.21)	-	-	-	-	-	-	-	-
TpB_UVB_BPS1_VEP_ALL.xlsx	TpB	UVB	BPS1	1:153781769-153781769	A	non_coding_transcript_exon_variant	MODIFIER	Rgsl1	ENSMUSG00000042641	Transcript	ENSMUST00000145308.7	processed_transcript	04 of 04	-	ENSMUST00000145308.7:n.403C>T	-	403	-	-	-	-	-	-	-1	-	MGI	-	-	3	-	-	-	-	-	-	-	-	-	-	-	-	-	-	-
TpB_UVB_BPS1_VEP_ALL.xlsx	TpB	UVB	BPS1	1:153876607-153876607	C	3_prime_UTR_variant	MODIFIER	Teddm1b	ENSMUSG00000043282	Transcript	ENSMUST00000055314.3	protein_coding	01 of 01	-	ENSMUST00000055314.3:c.*1240G>C	-	2263	-	-	-	-	-	-	1	-	MGI	-	-	-	P1	CCDS15379.1	ENSMUSP00000058437	-	Q8CC62	UPI00000E93F6	-	-	-	-	-	-	-	-	-
TpB_UVB_BPS1_VEP_ALL.xlsx	TpB	UVB	BPS1	1:155197320-155197320	T	intron_variant	MODIFIER	Stx6	ENSMUSG00000026470	Transcript	ENSMUST00000027743.12	protein_coding	-	06 of 07	ENSMUST00000027743.12:c.597-21C>T	-	-	-	-	-	-	-	-	1	-	MGI	-	-	1	P1	CCDS35741.1	ENSMUSP00000027743	Q9JKK1	-	UPI0000028B02	-	-	-	-	-	-	-	-	-
TpB_UVB_BPS1_VEP_ALL.xlsx	TpB	UVB	BPS1	1:155225930-155225930	A	missense_variant	MODERATE	BC034090	ENSMUSG00000033722	Transcript	ENSMUST00000035914.4	protein_coding	02 of 07	-	ENSMUST00000035914.4:c.587C>T	ENSMUSP00000037456.4:p.Ser196Phe	814	587	196	S/F	tCc/tTc	-	-	-1	-	MGI	-	-	1	A2	-	ENSMUSP00000037456	-	F6T2X5	UPI00001E2ED0	deleterious(0)	-	-	-	-	-	-	-	-
TpB_UVB_BPS1_VEP_ALL.xlsx	TpB	UVB	BPS1	1:155225930-155225930	A	downstream_gene_variant	MODIFIER	BC034090	ENSMUSG00000033722	Transcript	ENSMUST00000186082.2	retained_intron	-	-	-	-	-	-	-	-	-	-	194	-1	-	MGI	-	-	3	-	-	-	-	-	-	-	-	-	-	-	-	-	-	-
TpB_UVB_BPS1_VEP_ALL.xlsx	TpB	UVB	BPS1	1:156888050-156888050	T	intron_variant	MODIFIER	Ralgps2	ENSMUSG00000026594	Transcript	ENSMUST00000027886.13	protein_coding	-	04 of 18	ENSMUST00000027886.13:c.214-20T>A	-	-	-	-	-	-	-	-	-1	-	MGI	-	-	1	A2	CCDS48406.1	ENSMUSP00000027886	Q9ERD6	-	UPI000005FB38	-	-	-	-	-	-	-	-	-
TpB_UVB_BPS1_VEP_ALL.xlsx	TpB	UVB	BPS1	1:157230161-157230161	G	intron_variant	MODIFIER	Rasal2	ENSMUSG00000070565	Transcript	ENSMUST00000078308.12	protein_coding	-	03 of 17	ENSMUST00000078308.12:c.455-16T>C	-	-	-	-	-	-	-	-	-1	-	MGI	-	-	1	P1	CCDS48408.1	ENSMUSP00000077423	-	E9PW37	UPI000060400C	-	-	-	-	-	-	-	-	-
TpB_UVB_BPS1_VEP_ALL.xlsx	TpB	UVB	BPS1	1:158266525-158266525	A	synonymous_variant	LOW	Brinp2	ENSMUSG00000004031	Transcript	ENSMUST00000004133.10	protein_coding	04 of 08	-	ENSMUST00000004133.10:c.606C>T	ENSMUSP00000004133.8:p.Phe202%3D	1492	606	202	F	ttC/ttT	-	-	-1	-	MGI	-	-	1	P1	CCDS15401.1	ENSMUSP00000004133	Q6DFY8	-	UPI00001C246B	-	-	-	-	-	-	-	-	-
TpB_UVB_BPS1_VEP_ALL.xlsx	TpB	UVB	BPS1	1:158266525-158266525	A	3_prime_UTR_variant,NMD_transcript_variant	MODIFIER	Brinp2	ENSMUSG00000004031	Transcript	ENSMUST00000195271.4	nonsense_mediated_decay	04 of 08	-	ENSMUST00000195271.4:c.*1201C>T	-	2231	-	-	-	-	-	-	-1	-	MGI	-	-	2	-	-	ENSMUSP00000141709	-	A0A0A6YWU9	UPI00053BD68F	-	-	-	-	-	-	-	-	-
TpB_UVB_BPS1_VEP_ALL.xlsx	TpB	UVB	BPS1	1:160930137-160930137	A	stop_gained	HIGH	Rc3h1	ENSMUSG00000040423	Transcript	ENSMUST00000035911.4	protein_coding	01 of 19	-	ENSMUST00000035911.4:c.24G>A	ENSMUSP00000037178.4:p.Trp8Ter	114	24	8	W/*	tgG/tgA	-	-	1	-	MGI	-	-	5	A2	-	ENSMUSP00000037178	-	H7BX02	UPI0001DD3575	-	-	-	-	-	-	-	-	-
TpB_UVB_BPS1_VEP_ALL.xlsx	TpB	UVB	BPS1	1:161781504-161781504	C	3_prime_UTR_variant	MODIFIER	Fasl	ENSMUSG00000000817	Transcript	ENSMUST00000000834.3	protein_coding	04 of 04	-	ENSMUST00000000834.3:c.*72C>G	-	1122	-	-	-	-	-	-	-1	-	MGI	-	-	1	P1	CCDS15418.1	ENSMUSP00000000834	P41047	Q544E9	UPI0000004022	-	-	-	-	-	-	-	-	-
TpB_UVB_BPS1_VEP_ALL.xlsx	TpB	UVB	BPS1	1:161788250-161788250	T	synonymous_variant	LOW	Fasl	ENSMUSG00000000817	Transcript	ENSMUST00000000834.3	protein_coding	01 of 04	-	ENSMUST00000000834.3:c.36C>A	ENSMUSP00000000834.2:p.Ile12%3D	246	36	12	I	atC/atA	-	-	-1	-	MGI	-	-	1	P1	CCDS15418.1	ENSMUSP00000000834	P41047	Q544E9	UPI0000004022	-	-	-	-	-	-	-	-	-
TpB_UVB_BPS1_VEP_ALL.xlsx	TpB	UVB	BPS1	1:161788250-161788250	T	intron_variant	MODIFIER	Fasl	ENSMUSG00000000817	Transcript	ENSMUST00000193648.1	protein_coding	-	01 of 01	ENSMUST00000193648.1:c.-7+73C>A	-	-	-	-	-	-	-	-	-1	-	MGI	-	-	1	-	-	ENSMUSP00000141422	P41047	-	UPI000002B583	-	-	-	-	-	-	-	-	-
TpB_UVB_BPS1_VEP_ALL.xlsx	TpB	UVB	BPS1	1:162920513-162920513	A	synonymous_variant	LOW	Fmo6	ENSMUSG00000095576	Transcript	ENSMUST00000178465.2	protein_coding	06 of 08	-	ENSMUST00000178465.2:c.981C>T	ENSMUSP00000136378.1:p.Phe327%3D	1073	981	327	F	ttC/ttT	-	-	-1	-	MGI	-	-	5	P1	CCDS56650.1	ENSMUSP00000136378	-	J3QMN6	UPI00001E2EE2	-	-	-	-	-	-	-	-	-
TpB_UVB_BPS1_VEP_ALL.xlsx	TpB	UVB	BPS1	1:162920513-162920513	A	3_prime_UTR_variant,NMD_transcript_variant	MODIFIER	Fmo6	ENSMUSG00000095576	Transcript	ENSMUST00000195576.4	nonsense_mediated_decay	07 of 09	-	ENSMUST00000195576.4:c.*641C>T	-	1167	-	-	-	-	-	-	-1	-	MGI	-	-	1	-	-	ENSMUSP00000144106	-	A0A0J9YUC0	UPI00001C2476	-	-	-	-	-	-	-	-	-
TpB_UVB_BPS1_VEP_ALL.xlsx	TpB	UVB	BPS1	1:163038107-163038107	A	intron_variant	MODIFIER	Mroh9	ENSMUSG00000071890	Transcript	ENSMUST00000096608.4	protein_coding	-	19 of 21	ENSMUST00000096608.4:c.2200-22A>T	-	-	-	-	-	-	-	-	-1	-	MGI	-	-	1	P1	CCDS48419.1	ENSMUSP00000094365	-	G5E8L9	UPI0000603F31	-	-	-	-	-	-	-	-	-
TpB_UVB_BPS1_VEP_ALL.xlsx	TpB	UVB	BPS1	1:164174308-164174308	C	missense_variant	MODERATE	F5	ENSMUSG00000026579	Transcript	ENSMUST00000086040.5	protein_coding	04 of 25	-	ENSMUST00000086040.5:c.579G>C	ENSMUSP00000083204.5:p.Lys193Asn	704	579	193	K/N	aaG/aaC	-	-	1	-	MGI	-	-	1	P1	CCDS35754.1	ENSMUSP00000083204	O88783	-	UPI00000E854B	deleterious(0)	-	-	-	-	-	-	-	-
TpB_UVB_BPS1_VEP_ALL.xlsx	TpB	UVB	BPS1	1:165338212-165338212	A	synonymous_variant	LOW	Dcaf6	ENSMUSG00000026571	Transcript	ENSMUST00000027856.12	protein_coding	16 of 19	-	ENSMUST00000027856.12:c.2347C>T	ENSMUSP00000027856.7:p.Leu783%3D	2585	2347	783	L	Ctg/Ttg	-	-	-1	-	MGI	-	-	1	P1	CCDS48424.1	ENSMUSP00000027856	Q9DC22	-	UPI0000028421	-	-	-	-	-	-	-	-	-
TpB_UVB_BPS1_VEP_ALL.xlsx	TpB	UVB	BPS1	1:165338212-165338212	A	non_coding_transcript_exon_variant	MODIFIER	Dcaf6	ENSMUSG00000026571	Transcript	ENSMUST00000193353.1	retained_intron	04 of 07	-	ENSMUST00000193353.1:n.2316C>T	-	2316	-	-	-	-	-	-	-1	-	MGI	-	-	2	-	-	-	-	-	-	-	-	-	-	-	-	-	-	-
TpB_UVB_BPS1_VEP_ALL.xlsx	TpB	UVB	BPS1	1:165551918-165551918	A	missense_variant	MODERATE	Adcy10	ENSMUSG00000026567	Transcript	ENSMUST00000027852.14	protein_coding	21 of 34	-	ENSMUST00000027852.14:c.2748G>A	ENSMUSP00000027852.8:p.Met916Ile	2961	2748	916	M/I	atG/atA	-	-	1	-	MGI	-	-	1	P2	CCDS35756.1	ENSMUSP00000027852	Q8C0T9	-	UPI0000F220EB	tolerated(0.31)	-	-	-	-	-	-	-	-
TpB_UVB_BPS1_VEP_ALL.xlsx	TpB	UVB	BPS1	1:165551918-165551918	A	downstream_gene_variant	MODIFIER	Adcy10	ENSMUSG00000026567	Transcript	ENSMUST00000124037.1	processed_transcript	-	-	-	-	-	-	-	-	-	-	612	1	-	MGI	-	-	3	-	-	-	-	-	-	-	-	-	-	-	-	-	-	-
TpB_UVB_BPS1_VEP_ALL.xlsx	TpB	UVB	BPS1	1:166163639-166163639	A	intron_variant	MODIFIER	Gpa33	ENSMUSG00000000544	Transcript	ENSMUST00000060833.13	protein_coding	-	04 of 06	ENSMUST00000060833.13:c.572-134G>A	-	-	-	-	-	-	-	-	1	-	MGI	-	-	1	P1	CCDS15447.1	ENSMUSP00000060147	-	A0A0R4J209	UPI0000028A58	-	-	-	-	-	-	-	-	-
TpB_UVB_BPS1_VEP_ALL.xlsx	TpB	UVB	BPS1	1:169961014-169961014	A	synonymous_variant	LOW	Hsd17b7	ENSMUSG00000026675	Transcript	ENSMUST00000027989.12	protein_coding	05 of 09	-	ENSMUST00000027989.12:c.633C>T	ENSMUSP00000027989.6:p.Phe211%3D	742	633	211	F	ttC/ttT	-	-	-1	-	MGI	-	-	1	P1	CCDS35766.1	ENSMUSP00000027989	O88736	-	UPI0000003F6A	-	-	-	-	-	-	-	-	-
TpB_UVB_BPS1_VEP_ALL.xlsx	TpB	UVB	BPS1	1:169961014-169961014	A	non_coding_transcript_exon_variant	MODIFIER	Hsd17b7	ENSMUSG00000026675	Transcript	ENSMUST00000123230.1	processed_transcript	04 of 06	-	ENSMUST00000123230.1:n.452C>T	-	452	-	-	-	-	-	-	-1	-	MGI	-	-	3	-	-	-	-	-	-	-	-	-	-	-	-	-	-	-
TpB_UVB_BPS1_VEP_ALL.xlsx	TpB	UVB	BPS1	1:170908011-170908011	A	synonymous_variant	LOW	Fcrlb	ENSMUSG00000070524	Transcript	ENSMUST00000094337.1	protein_coding	05 of 06	-	ENSMUST00000094337.1:c.693C>T	ENSMUSP00000091895.1:p.Ala231%3D	693	693	231	A	gcC/gcT	-	-	-1	-	MGI	-	-	1	P1	CCDS15475.1	ENSMUSP00000091895	Q5DRQ8	-	UPI000058B05B	-	-	-	-	-	-	-	-	-
TpB_UVB_BPS1_VEP_ALL.xlsx	TpB	UVB	BPS1	1:170908011-170908011	A	regulatory_region_variant	MODIFIER	-	-	RegulatoryFeature	ENSMUSR00000492831	-	-	-	-	-	-	-	-	-	-	-	-	-	-	-	-	-	-	-	-	-	-	-	-	-	-	-	-	-	-	-	-	-
TpB_UVB_BPS1_VEP_ALL.xlsx	TpB	UVB	BPS1	1:171246105-171246105	A	missense_variant	MODERATE	Ndufs2	ENSMUSG00000013593	Transcript	ENSMUST00000013737.12	protein_coding	02 of 13	-	ENSMUST00000013737.12:c.188C>T	ENSMUSP00000013737.6:p.Pro63Leu	222	188	63	P/L	cCt/cTt	-	-	-1	-	MGI	-	-	1	P1	CCDS15484.1	ENSMUSP00000013737	Q91WD5	-	UPI00000212C4	tolerated_low_confidence(0.41)	-	-	-	-	-	-	-	-
TpB_UVB_BPS1_VEP_ALL.xlsx	TpB	UVB	BPS1	1:171246105-171246105	A	upstream_gene_variant	MODIFIER	Adamts4	ENSMUSG00000006403	Transcript	ENSMUST00000111315.8	protein_coding	-	-	-	-	-	-	-	-	-	-	4316	1	-	MGI	-	-	1	A2	-	ENSMUSP00000106947	Q8BNJ2	-	UPI00001EDECE	-	-	-	-	-	-	-	-	-
TpB_UVB_BPS1_VEP_ALL.xlsx	TpB	UVB	BPS1	1:171580820-171580820	A	splice_region_variant,synonymous_variant	LOW	Cd244a	ENSMUSG00000004709	Transcript	ENSMUST00000004829.12	protein_coding	07 of 09	-	ENSMUST00000004829.12:c.1056G>A	ENSMUSP00000004829.7:p.Lys352%3D	1188	1056	352	K	aaG/aaA	-	-	1	-	MGI	-	-	1	P1	CCDS35778.1	ENSMUSP00000004829	Q07763	-	UPI0000020E26	-	-	-	-	-	-	-	-	-
TpB_UVB_BPS1_VEP_ALL.xlsx	TpB	UVB	BPS1	1:171580820-171580820	A	downstream_gene_variant	MODIFIER	Cd244a	ENSMUSG00000004709	Transcript	ENSMUST00000194170.1	retained_intron	-	-	-	-	-	-	-	-	-	-	2572	1	-	MGI	-	-	1	-	-	-	-	-	-	-	-	-	-	-	-	-	-	-
TpB_UVB_BPS1_VEP_ALL.xlsx	TpB	UVB	BPS1	1:171884828-171884828	T	intron_variant	MODIFIER	Cd84	ENSMUSG00000038147	Transcript	ENSMUST00000042302.6	protein_coding	-	05 of 06	ENSMUST00000042302.6:c.861+149A>T	-	-	-	-	-	-	-	-	1	-	MGI	-	-	1	P3	CCDS15503.1	ENSMUSP00000047024	-	A0A0R4J0K5	UPI00000295E0	-	-	-	-	-	-	-	-	-
TpB_UVB_BPS1_VEP_ALL.xlsx	TpB	UVB	BPS1	1:172323118-172323118	A	downstream_gene_variant	MODIFIER	Igsf8	ENSMUSG00000038034	Transcript	ENSMUST00000039506.14	protein_coding	-	-	-	-	-	-	-	-	-	-	3277	1	-	MGI	-	-	1	P1	CCDS15511.1	ENSMUSP00000041232	-	A0A0R4J117	UPI0000024AE6	-	-	-	-	-	-	-	-	-
TpB_UVB_BPS1_VEP_ALL.xlsx	TpB	UVB	BPS1	1:172323118-172323118	A	synonymous_variant	LOW	Kcnj9	ENSMUSG00000038026	Transcript	ENSMUST00000062387.7	protein_coding	04 of 04	-	ENSMUST00000062387.7:c.927C>T	ENSMUSP00000060110.2:p.Thr309%3D	1240	927	309	T	acC/acT	-	-	-1	-	MGI	-	-	1	P1	CCDS35783.1	ENSMUSP00000060110	P48543	Q544N3	UPI00000010DD	-	-	-	-	-	-	-	-	-
TpB_UVB_BPS1_VEP_ALL.xlsx	TpB	UVB	BPS1	1:173184094-173184094	A	synonymous_variant	LOW	Olfr1406	ENSMUSG00000058981	Transcript	ENSMUST00000072395.2	protein_coding	01 of 01	-	ENSMUST00000072395.2:c.339C>T	ENSMUSP00000072231.2:p.Leu113%3D	411	339	113	L	ctC/ctT	-	-	-1	-	MGI	-	-	-	P1	CCDS15523.1	ENSMUSP00000072231	-	E9Q8X1	UPI00000246D3	-	-	-	-	-	-	-	-	-
TpB_UVB_BPS1_VEP_ALL.xlsx	TpB	UVB	BPS1	1:173755802-173755802	A	synonymous_variant	LOW	Ifi204	ENSMUSG00000073489	Transcript	ENSMUST00000111214.3	protein_coding	05 of 09	-	ENSMUST00000111214.3:c.849C>T	ENSMUSP00000106845.2:p.Ile283%3D	978	849	283	I	atC/atT	-	-	-1	-	MGI	-	-	5	P1	CCDS35792.1	ENSMUSP00000106845	P0DOV2	-	UPI0000E826AB	-	-	-	-	-	-	-	-	-
TpB_UVB_BPS1_VEP_ALL.xlsx	TpB	UVB	BPS1	1:173755802-173755802	A	downstream_gene_variant	MODIFIER	Ifi204	ENSMUSG00000073489	Transcript	ENSMUST00000192414.1	retained_intron	-	-	-	-	-	-	-	-	-	-	4556	-1	-	MGI	-	-	1	-	-	-	-	-	-	-	-	-	-	-	-	-	-	-
TpB_UVB_BPS1_VEP_ALL.xlsx	TpB	UVB	BPS1	1:173860044-173860044	A	intron_variant	MODIFIER	Mndal	ENSMUSG00000090272	Transcript	ENSMUST00000186442.6	protein_coding	-	06 of 06	ENSMUST00000186442.6:c.1332+132A>T	-	-	-	-	-	-	-	-	-1	-	MGI	-	-	5	A2	-	ENSMUSP00000140539	-	A0A087WRA4	UPI00001EDFC0	-	-	-	-	-	-	-	-	-
TpB_UVB_BPS1_VEP_ALL.xlsx	TpB	UVB	BPS1	1:174069453-174069453	A	missense_variant	MODERATE	Olfr430	ENSMUSG00000050134	Transcript	ENSMUST00000055873.6	protein_coding	01 of 01	-	ENSMUST00000055873.6:c.154G>A	ENSMUSP00000130615.1:p.Asp52Asn	154	154	52	D/N	Gat/Aat	-	-	1	-	MGI	-	-	-	P1	CCDS48454.1	ENSMUSP00000130615	-	E9Q5F1	UPI0000F1D222	tolerated(0.2)	-	-	-	-	-	-	-	-
TpB_UVB_BPS1_VEP_ALL.xlsx	TpB	UVB	BPS1	1:174117004-174117004	A	downstream_gene_variant	MODIFIER	Olfr231	ENSMUSG00000046486	Transcript	ENSMUST00000063030.3	protein_coding	-	-	-	-	-	-	-	-	-	-	87	-1	-	MGI	-	-	-	P1	CCDS48456.1	ENSMUSP00000059596	-	E9Q0M4	UPI00015058D4	-	-	-	-	-	-	-	-	-
TpB_UVB_BPS1_VEP_ALL.xlsx	TpB	UVB	BPS1	1:174117179-174117179	A	missense_variant	MODERATE	Olfr231	ENSMUSG00000046486	Transcript	ENSMUST00000063030.3	protein_coding	01 of 01	-	ENSMUST00000063030.3:c.836C>T	ENSMUSP00000059596.3:p.Pro279Leu	836	836	279	P/L	cCc/cTc	-	-	-1	-	MGI	-	-	-	P1	CCDS48456.1	ENSMUSP00000059596	-	E9Q0M4	UPI00015058D4	deleterious(0)	-	-	-	-	-	-	-	-
TpB_UVB_BPS1_VEP_ALL.xlsx	TpB	UVB	BPS1	1:174218571-174218571	A	intron_variant	MODIFIER	Spta1	ENSMUSG00000026532	Transcript	ENSMUST00000027817.7	protein_coding	-	34 of 51	ENSMUST00000027817.7:c.4869+31G>A	-	-	-	-	-	-	-	-	1	-	MGI	-	-	1	P1	CCDS35795.1	ENSMUSP00000027817	P08032	-	UPI0000167F55	-	-	-	-	-	-	-	-	-
TpB_UVB_BPS1_VEP_ALL.xlsx	TpB	UVB	BPS1	1:174581995-174581995	T	missense_variant	MODERATE	Fmn2	ENSMUSG00000028354	Transcript	ENSMUST00000030039.12	protein_coding	03 of 18	-	ENSMUST00000030039.12:c.1793G>T	ENSMUSP00000030039.7:p.Arg598Ile	2014	1793	598	R/I	aGa/aTa	-	-	1	-	MGI	-	-	1	P1	CCDS48459.1	ENSMUSP00000030039	Q9JL04	-	UPI000050CD52	deleterious(0)	-	-	-	-	-	-	-	-
TpB_UVB_BPS1_VEP_ALL.xlsx	TpB	UVB	BPS1	1:174581995-174581995	T	non_coding_transcript_exon_variant	MODIFIER	Fmn2	ENSMUSG00000028354	Transcript	ENSMUST00000191821.1	processed_transcript	02 of 03	-	ENSMUST00000191821.1:n.247G>T	-	247	-	-	-	-	-	-	1	-	MGI	-	-	3	-	-	-	-	-	-	-	-	-	-	-	-	-	-	-
TpB_UVB_BPS1_VEP_ALL.xlsx	TpB	UVB	BPS1	1:175078074-175078074	A	intron_variant	MODIFIER	Rgs7	ENSMUSG00000026527	Transcript	ENSMUST00000027812.10	protein_coding	-	15 of 15	ENSMUST00000027812.10:c.1359+115C>T	-	-	-	-	-	-	-	-	-1	-	MGI	-	-	5	P3	CCDS15546.1	ENSMUSP00000027812	O54829	-	UPI00001EDFE0	-	-	-	-	-	-	-	-	-
TpB_UVB_BPS1_VEP_ALL.xlsx	TpB	UVB	BPS1	1:176750183-176750183	T	intron_variant	MODIFIER	Cep170	ENSMUSG00000057335	Transcript	ENSMUST00000057037.12	protein_coding	-	13 of 19	ENSMUST00000057037.12:c.3647-23T>A	-	-	-	-	-	-	-	-	-1	-	MGI	-	-	5	P2	CCDS48461.1	ENSMUSP00000059562	-	H7BX26	UPI000060403D	-	-	-	-	-	-	-	-	-
TpB_UVB_BPS1_VEP_ALL.xlsx	TpB	UVB	BPS1	1:177787009-177787009	A	intron_variant	MODIFIER	Adss	ENSMUSG00000015961	Transcript	ENSMUST00000016105.8	protein_coding	-	01 of 12	ENSMUST00000016105.8:c.184-2011C>T	-	-	-	-	-	-	-	-	-1	-	MGI	-	-	1	P1	CCDS15555.1	ENSMUSP00000016105	P46664	B9EIE9	UPI0000021447	-	-	-	-	-	-	-	-	-
TpB_UVB_BPS1_VEP_ALL.xlsx	TpB	UVB	BPS1	1:180438206-180438206	T	3_prime_UTR_variant	MODIFIER	Stum	ENSMUSG00000053963	Transcript	ENSMUST00000136521.1	protein_coding	04 of 04	-	ENSMUST00000136521.1:c.*123T>A	-	687	-	-	-	-	-	-	-1	-	MGI	-	-	1	P2	CCDS48467.1	ENSMUSP00000119782	Q0VBF8	-	UPI00004287CA	-	-	-	-	-	-	-	-	-
TpB_UVB_BPS1_VEP_ALL.xlsx	TpB	UVB	BPS1	1:180438317-180438317	A	3_prime_UTR_variant	MODIFIER	Stum	ENSMUSG00000053963	Transcript	ENSMUST00000136521.1	protein_coding	04 of 04	-	ENSMUST00000136521.1:c.*12C>T	-	576	-	-	-	-	-	-	-1	-	MGI	-	-	1	P2	CCDS48467.1	ENSMUSP00000119782	Q0VBF8	-	UPI00004287CA	-	-	-	-	-	-	-	-	-
TpB_UVB_BPS1_VEP_ALL.xlsx	TpB	UVB	BPS1	1:181197684-181197684	A	3_prime_UTR_variant,NMD_transcript_variant	MODIFIER	Wdr26	ENSMUSG00000038733	Transcript	ENSMUST00000036329.11	nonsense_mediated_decay	06 of 14	-	ENSMUST00000036329.11:c.*305C>T	-	855	-	-	-	-	-	-	-1	cds_start_NF	MGI	-	-	5	-	-	ENSMUSP00000045177	-	F8WH48	UPI0001DD3467	-	-	-	-	-	-	-	-	-
TpB_UVB_BPS1_VEP_ALL.xlsx	TpB	UVB	BPS1	1:181197684-181197684	A	missense_variant	MODERATE	Wdr26	ENSMUSG00000038733	Transcript	ENSMUST00000162819.8	protein_coding	06 of 14	-	ENSMUST00000162819.8:c.850C>T	ENSMUSP00000124592.1:p.Leu284Phe	1391	850	284	L/F	Ctc/Ttc	-	-	-1	-	MGI	-	-	1	P1	CCDS15583.2	ENSMUSP00000124592	Q8C6G8	-	UPI00015DF6D9	deleterious(0)	-	-	-	-	-	-	-	-
TpB_UVB_BPS1_VEP_ALL.xlsx	TpB	UVB	BPS1	1:181409794-181409794	A	intron_variant	MODIFIER	Cnih3	ENSMUSG00000026514	Transcript	ENSMUST00000027795.13	protein_coding	-	03 of 05	ENSMUST00000027795.13:c.198+118G>A	-	-	-	-	-	-	-	-	1	-	MGI	-	-	1	P1	CCDS48470.1	ENSMUSP00000027795	Q6ZWS4	-	UPI0000003FD7	-	-	-	-	-	-	-	-	-
TpB_UVB_BPS1_VEP_ALL.xlsx	TpB	UVB	BPS1	1:182461761-182461761	T	3_prime_UTR_variant	MODIFIER	Trp53bp2	ENSMUSG00000026510	Transcript	ENSMUST00000117245.1	protein_coding	18 of 18	-	ENSMUST00000117245.1:c.*33A>T	-	3690	-	-	-	-	-	-	1	-	MGI	-	-	5	P1	CCDS48476.1	ENSMUSP00000112508	-	E9QJU8	UPI0000356033	-	-	-	-	-	-	-	-	-
TpB_UVB_BPS1_VEP_ALL.xlsx	TpB	UVB	BPS1	1:182461762-182461762	A	3_prime_UTR_variant	MODIFIER	Trp53bp2	ENSMUSG00000026510	Transcript	ENSMUST00000117245.1	protein_coding	18 of 18	-	ENSMUST00000117245.1:c.*34G>A	-	3691	-	-	-	-	-	-	1	-	MGI	-	-	5	P1	CCDS48476.1	ENSMUSP00000112508	-	E9QJU8	UPI0000356033	-	-	-	-	-	-	-	-	-
TpB_UVB_BPS1_VEP_ALL.xlsx	TpB	UVB	BPS1	1:182628704-182628704	C	missense_variant	MODERATE	Capn8	ENSMUSG00000038599	Transcript	ENSMUST00000048941.13	protein_coding	19 of 21	-	ENSMUST00000048941.13:c.2018A>C	ENSMUSP00000047164.7:p.Glu673Ala	2067	2018	673	E/A	gAg/gCg	-	-	1	-	MGI	-	-	1	P1	CCDS35814.1	ENSMUSP00000047164	-	A0A0R4J0K6	UPI0000E54865	deleterious(0)	-	-	-	-	-	-	-	-
TpB_UVB_BPS1_VEP_ALL.xlsx	TpB	UVB	BPS1	1:182628704-182628704	C	3_prime_UTR_variant,NMD_transcript_variant	MODIFIER	Capn8	ENSMUSG00000038599	Transcript	ENSMUST00000192671.1	nonsense_mediated_decay	19 of 21	-	ENSMUST00000192671.1:c.*10A>C	-	2106	-	-	-	-	-	-	1	-	MGI	-	-	1	-	-	ENSMUSP00000141275	-	A0A0A6YVU9	UPI00053BD858	-	-	-	-	-	-	-	-	-
TpB_UVB_BPS1_VEP_ALL.xlsx	TpB	UVB	BPS1	1:184919444-184919444	A	intron_variant	MODIFIER	Mark1	ENSMUSG00000026620	Transcript	ENSMUST00000027929.9	protein_coding	-	08 of 17	ENSMUST00000027929.9:c.790-15C>T	-	-	-	-	-	-	-	-	-1	-	MGI	-	-	1	P1	CCDS35817.1	ENSMUSP00000027929	Q8VHJ5	-	UPI0000356042	-	-	-	-	-	-	-	-	-
TpB_UVB_BPS1_VEP_ALL.xlsx	TpB	UVB	BPS1	1:188981437-188981437	A	intron_variant	MODIFIER	Kctd3	ENSMUSG00000026608	Transcript	ENSMUST00000085678.7	protein_coding	-	12 of 17	ENSMUST00000085678.7:c.1142-42C>T	-	-	-	-	-	-	-	-	-1	-	MGI	-	-	1	P1	CCDS15608.1	ENSMUSP00000082821	Q8BFX3	-	UPI000002717C	-	-	-	-	-	-	-	-	-
TpB_UVB_BPS1_VEP_ALL.xlsx	TpB	UVB	BPS1	1:190941154-190941154	A	synonymous_variant	LOW	Angel2	ENSMUSG00000026634	Transcript	ENSMUST00000027947.12	protein_coding	06 of 10	-	ENSMUST00000027947.12:c.927G>A	ENSMUSP00000027947.6:p.Glu309%3D	1049	927	309	E	gaG/gaA	-	-	1	-	MGI	-	-	1	A1	CCDS56667.1	ENSMUSP00000027947	Q8K1C0	-	UPI00005ABBC6	-	-	-	-	-	-	-	-	-
TpB_UVB_BPS1_VEP_ALL.xlsx	TpB	UVB	BPS1	1:190941154-190941154	A	downstream_gene_variant	MODIFIER	Angel2	ENSMUSG00000026634	Transcript	ENSMUST00000130298.3	nonsense_mediated_decay	-	-	-	-	-	-	-	-	-	-	3677	1	-	MGI	-	-	5	-	-	ENSMUSP00000142318	-	A0A0A6YY82	UPI00053BD711	-	-	-	-	-	-	-	-	-
TpB_UVB_BPS1_VEP_ALL.xlsx	TpB	UVB	BPS1	1:191162877-191162877	G	missense_variant	MODERATE	Fam71a	ENSMUSG00000091017	Transcript	ENSMUST00000171798.1	protein_coding	01 of 01	-	ENSMUST00000171798.1:c.1568T>C	ENSMUSP00000127945.1:p.Leu523Pro	1941	1568	523	L/P	cTg/cCg	-	-	-1	-	MGI	-	-	-	P1	CCDS48487.1	ENSMUSP00000127945	-	B7XG49	UPI00001C251E	deleterious(0)	-	-	-	-	-	-	-	-
TpB_UVB_BPS1_VEP_ALL.xlsx	TpB	UVB	BPS1	1:191827216-191827216	A	missense_variant	MODERATE	Nek2	ENSMUSG00000026622	Transcript	ENSMUST00000027931.7	protein_coding	06 of 08	-	ENSMUST00000027931.7:c.832G>A	ENSMUSP00000027931.7:p.Glu278Lys	1034	832	278	E/K	Gag/Aag	-	-	1	-	MGI	-	-	1	P1	CCDS15623.1	ENSMUSP00000027931	O35942	-	UPI000002296D	tolerated(0.15)	-	-	-	-	-	-	-	-
TpB_UVB_BPS1_VEP_ALL.xlsx	TpB	UVB	BPS1	1:191827216-191827216	A	non_coding_transcript_exon_variant	MODIFIER	Nek2	ENSMUSG00000026622	Transcript	ENSMUST00000126446.7	retained_intron	06 of 06	-	ENSMUST00000126446.7:n.968G>A	-	968	-	-	-	-	-	-	1	-	MGI	-	-	2	-	-	-	-	-	-	-	-	-	-	-	-	-	-	-
TpB_UVB_BPS1_VEP_ALL.xlsx	TpB	UVB	BPS1	1:195165067-195165067	T	downstream_gene_variant	MODIFIER	Cr2	ENSMUSG00000026616	Transcript	ENSMUST00000043104.8	protein_coding	-	-	-	-	-	-	-	-	-	-	678	-1	-	MGI	-	-	5	-	-	ENSMUSP00000044261	-	E9Q3S5	UPI00027471A8	-	-	-	-	-	-	-	-	-
TpB_UVB_BPS1_VEP_ALL.xlsx	TpB	UVB	BPS1	1:195165067-195165067	T	synonymous_variant	LOW	Cr2	ENSMUSG00000026616	Transcript	ENSMUST00000210219.1	protein_coding	08 of 25	-	ENSMUST00000210219.1:c.1158C>A	ENSMUSP00000147804.1:p.Ile386%3D	1158	1158	386	I	atC/atA	-	-	-1	-	MGI	-	-	5	P1	-	ENSMUSP00000147804	-	A0A1B0GS59	UPI0003D78BD0	-	-	-	-	-	-	-	-	-
TpB_UVB_BPS1_VEP_ALL.xlsx	TpB	UVB	BPS1	10:5293044-5293044	T	intron_variant	MODIFIER	Syne1	ENSMUSG00000096054	Transcript	ENSMUST00000215295.1	protein_coding	-	54 of 145	ENSMUST00000215295.1:c.8616+32G>A	-	-	-	-	-	-	-	-	-1	-	MGI	-	-	5	P1	-	ENSMUSP00000150262	-	A0A1L1STC6	UPI0008FC1CBA	-	-	-	-	-	-	-	-	-
TpB_UVB_BPS1_VEP_ALL.xlsx	TpB	UVB	BPS1	10:23172946-23172946	A	intron_variant	MODIFIER	Eya4	ENSMUSG00000010461	Transcript	ENSMUST00000074366.6	protein_coding	-	04 of 18	ENSMUST00000074366.6:c.208+53C>T	-	-	-	-	-	-	-	-	-1	-	MGI	-	-	1	-	CCDS83687.1	ENSMUSP00000073970	Q9Z191	-	UPI000056515F	-	-	-	-	-	-	-	-	-
TpB_UVB_BPS1_VEP_ALL.xlsx	TpB	UVB	BPS1	10:24798988-24798988	A	intron_variant	MODIFIER	Enpp3	ENSMUSG00000019989	Transcript	ENSMUST00000020169.8	protein_coding	-	12 of 24	ENSMUST00000020169.8:c.1120+170C>T	-	-	-	-	-	-	-	-	-1	-	MGI	-	-	1	P1	CCDS23752.1	ENSMUSP00000020169	Q6DYE8	-	UPI0000D8AFA8	-	-	-	-	-	-	-	-	-
TpB_UVB_BPS1_VEP_ALL.xlsx	TpB	UVB	BPS1	10:24883328-24883328	A	intron_variant	MODIFIER	Med23	ENSMUSG00000019984	Transcript	ENSMUST00000020159.14	protein_coding	-	10 of 28	ENSMUST00000020159.14:c.885+679G>A	-	-	-	-	-	-	-	-	1	-	MGI	-	-	1	P3	CCDS35871.2	ENSMUSP00000020159	-	F8WJB0	UPI00004290E6	-	-	-	-	-	-	-	-	-
TpB_UVB_BPS1_VEP_ALL.xlsx	TpB	UVB	BPS1	10:26079126-26079126	A	non_coding_transcript_exon_variant	MODIFIER	Gm9767	ENSMUSG00000039098	Transcript	ENSMUST00000041011.3	antisense	01 of 01	-	ENSMUST00000041011.3:n.872G>A	-	872	-	-	-	-	-	-	1	-	MGI	-	-	-	-	-	-	-	-	-	-	-	-	-	-	-	-	-	-
TpB_UVB_BPS1_VEP_ALL.xlsx	TpB	UVB	BPS1	10:27041291-27041291	T	intron_variant	MODIFIER	Lama2	ENSMUSG00000019899	Transcript	ENSMUST00000092639.11	protein_coding	-	47 of 64	ENSMUST00000092639.11:c.6696-59C>A	-	-	-	-	-	-	-	-	-1	-	MGI	-	-	5	P1	CCDS48526.1	ENSMUSP00000090304	Q60675	-	UPI0000E6A55D	-	-	-	-	-	-	-	-	-
TpB_UVB_BPS1_VEP_ALL.xlsx	TpB	UVB	BPS1	10:33877331-33877331	T	synonymous_variant	LOW	Sult3a1	ENSMUSG00000069668	Transcript	ENSMUST00000092597.3	protein_coding	05 of 06	-	ENSMUST00000092597.3:c.622C>T	ENSMUSP00000090259.3:p.Leu208%3D	634	622	208	L	Ctg/Ttg	-	-	1	-	MGI	-	-	5	P1	CCDS23771.1	ENSMUSP00000090259	-	Q059N0	UPI0000021727	-	-	-	-	-	-	-	-	-
TpB_UVB_BPS1_VEP_ALL.xlsx	TpB	UVB	BPS1	10:33877331-33877331	T	upstream_gene_variant	MODIFIER	Gm47935	ENSMUSG00000112447	Transcript	ENSMUST00000217760.1	processed_pseudogene	-	-	-	-	-	-	-	-	-	-	4313	-1	-	MGI	-	-	-	-	-	-	-	-	-	-	-	-	-	-	-	-	-	-
TpB_UVB_BPS1_VEP_ALL.xlsx	TpB	UVB	BPS1	10:39155259-39155259	A	downstream_gene_variant	MODIFIER	Tube1	ENSMUSG00000019845	Transcript	ENSMUST00000019991.7	protein_coding	-	-	-	-	-	-	-	-	-	-	4201	1	-	MGI	-	-	1	P1	CCDS23787.1	ENSMUSP00000019991	Q9D6T1	-	UPI0000027232	-	-	-	-	-	-	-	-	-
TpB_UVB_BPS1_VEP_ALL.xlsx	TpB	UVB	BPS1	10:40549166-40549166	T	non_coding_transcript_exon_variant	MODIFIER	Gm18671	ENSMUSG00000111251	Transcript	ENSMUST00000214826.1	processed_pseudogene	01 of 01	-	ENSMUST00000214826.1:n.275C>T	-	275	-	-	-	-	-	-	1	-	MGI	-	-	-	-	-	-	-	-	-	-	-	-	-	-	-	-	-	-
TpB_UVB_BPS1_VEP_ALL.xlsx	TpB	UVB	BPS1	10:43821117-43821117	A	upstream_gene_variant	MODIFIER	Gm9034	ENSMUSG00000094852	Transcript	ENSMUST00000182071.1	processed_pseudogene	-	-	-	-	-	-	-	-	-	-	114	1	-	MGI	-	-	-	-	-	-	-	-	-	-	-	-	-	-	-	-	-	-
TpB_UVB_BPS1_VEP_ALL.xlsx	TpB	UVB	BPS1	10:43881707-43881707	T	intron_variant	MODIFIER	Qrsl1	ENSMUSG00000019863	Transcript	ENSMUST00000020012.6	protein_coding	-	08 of 10	ENSMUST00000020012.6:c.1031-117G>A	-	-	-	-	-	-	-	-	-1	-	MGI	-	-	1	P1	CCDS35894.1	ENSMUSP00000020012	Q9CZN8	-	UPI000002778A	-	-	-	-	-	-	-	-	-
TpB_UVB_BPS1_VEP_ALL.xlsx	TpB	UVB	BPS1	10:45155779-45155779	A	intron_variant	MODIFIER	Prep	ENSMUSG00000019849	Transcript	ENSMUST00000099858.3	protein_coding	-	14 of 14	ENSMUST00000099858.3:c.1838+107G>A	-	-	-	-	-	-	-	-	1	-	MGI	-	-	1	P1	CCDS23826.1	ENSMUSP00000097444	Q9QUR6	Q543B9	UPI0000001926	-	-	-	-	-	-	-	-	-
TpB_UVB_BPS1_VEP_ALL.xlsx	TpB	UVB	BPS1	10:52354437-52354437	G	intron_variant	MODIFIER	Gopc	ENSMUSG00000019861	Transcript	ENSMUST00000020008.9	protein_coding	-	03 of 07	ENSMUST00000020008.9:c.629+135T>C	-	-	-	-	-	-	-	-	-1	-	MGI	-	-	1	P2	CCDS35898.1	ENSMUSP00000020008	Q8BH60	-	UPI0000021763	-	-	-	-	-	-	-	-	-
TpB_UVB_BPS1_VEP_ALL.xlsx	TpB	UVB	BPS1	10:58231037-58231037	T	downstream_gene_variant	MODIFIER	Gm4981	ENSMUSG00000075045	Transcript	ENSMUST00000099726.4	protein_coding	-	-	-	-	-	-	-	-	-	-	3811	-1	-	MGI	-	-	-	P1	CCDS48564.1	ENSMUSP00000097314	-	Q3ULJ8	UPI00001C69A4	-	-	-	-	-	-	-	-	-
TpB_UVB_BPS1_VEP_ALL.xlsx	TpB	UVB	BPS1	10:58231037-58231037	T	missense_variant	MODERATE	Duxf3	ENSMUSG00000075046	Transcript	ENSMUST00000174056.3	protein_coding	02 of 02	-	ENSMUST00000174056.3:c.169G>A	ENSMUSP00000133909.2:p.Glu57Lys	428	169	57	E/K	Gaa/Aaa	-	-	-1	-	MGI	-	-	5	-	-	ENSMUSP00000133909	-	Q9D4C0	UPI0000029F2D	tolerated_low_confidence(0.23)	-	-	-	-	-	-	-	-
TpB_UVB_BPS1_VEP_ALL.xlsx	TpB	UVB	BPS1	10:60465505-60465505	A	synonymous_variant	LOW	Cdh23	ENSMUSG00000012819	Transcript	ENSMUST00000073242.10	protein_coding	12 of 01	-	ENSMUST00000073242.10:c.1389C>T	ENSMUSP00000072973.4:p.Pro463%3D	1389	1389	463	P	ccC/ccT	-	-	-1	-	MGI	-	-	5	A2	-	ENSMUSP00000072973	-	F8WIF5	UPI0000DBECDB	-	-	-	-	-	-	-	-	-
TpB_UVB_BPS1_VEP_ALL.xlsx	TpB	UVB	BPS1	10:60465505-60465505	A	non_coding_transcript_exon_variant	MODIFIER	Cdh23	ENSMUSG00000012819	Transcript	ENSMUST00000128249.7	retained_intron	12 of 01	-	ENSMUST00000128249.7:n.1383C>T	-	1383	-	-	-	-	-	-	-1	-	MGI	-	-	5	-	-	-	-	-	-	-	-	-	-	-	-	-	-	-
TpB_UVB_BPS1_VEP_ALL.xlsx	TpB	UVB	BPS1	10:61851071-61851071	T	intron_variant,non_coding_transcript_variant	MODIFIER	Col13a1	ENSMUSG00000058806	Transcript	ENSMUST00000051826.13	retained_intron	-	32 of 33	ENSMUST00000051826.13:n.1873+41G>A	-	-	-	-	-	-	-	-	-1	-	MGI	-	-	2	-	-	-	-	-	-	-	-	-	-	-	-	-	-	-
TpB_UVB_BPS1_VEP_ALL.xlsx	TpB	UVB	BPS1	10:67997534-67997534	T	intron_variant,NMD_transcript_variant	MODIFIER	Rtkn2	ENSMUSG00000037846	Transcript	ENSMUST00000068994.13	nonsense_mediated_decay	-	02 of 14	ENSMUST00000068994.13:c.246-31C>T	-	-	-	-	-	-	-	-	1	-	MGI	-	-	1	-	-	ENSMUSP00000070717	Q14B46	-	UPI0000606440	-	-	-	-	-	-	-	-	-
TpB_UVB_BPS1_VEP_ALL.xlsx	TpB	UVB	BPS1	10:70142787-70142787	T	intron_variant	MODIFIER	Ccdc6	ENSMUSG00000048701	Transcript	ENSMUST00000147545.7	protein_coding	-	02 of 08	ENSMUST00000147545.7:c.432+59C>T	-	-	-	-	-	-	-	-	1	-	MGI	-	-	5	P1	CCDS48591.1	ENSMUSP00000123374	D3YZP9	-	UPI0000214040	-	-	-	-	-	-	-	-	-
TpB_UVB_BPS1_VEP_ALL.xlsx	TpB	UVB	BPS1	10:74645468-74645468	A	downstream_gene_variant	MODIFIER	Pcdh15	ENSMUSG00000052613	Transcript	ENSMUST00000124046.7	protein_coding	-	-	-	-	-	-	-	-	-	-	741	1	-	MGI	-	-	5	-	-	ENSMUSP00000121130	Q99PJ1	-	UPI0001889DCB	-	-	-	-	-	-	-	-	-
TpB_UVB_BPS1_VEP_ALL.xlsx	TpB	UVB	BPS1	10:75159777-75159777	G	intron_variant	MODIFIER	Bcr	ENSMUSG00000009681	Transcript	ENSMUST00000164107.2	protein_coding	-	12 of 22	ENSMUST00000164107.2:c.2600-9C>G	-	-	-	-	-	-	-	-	1	-	MGI	-	-	1	P1	CCDS35935.1	ENSMUSP00000126377	Q6PAJ1	-	UPI00006064D6	-	-	-	-	-	-	-	-	-
TpB_UVB_BPS1_VEP_ALL.xlsx	TpB	UVB	BPS1	10:75974341-75974341	T	intron_variant	MODIFIER	Gm5134	ENSMUSG00000033255	Transcript	ENSMUST00000099577.3	protein_coding	-	04 of 13	ENSMUST00000099577.3:c.399+56C>T	-	-	-	-	-	-	-	-	1	-	MGI	-	-	1	P1	CCDS35940.2	ENSMUSP00000097172	-	E9QAB5	UPI0000D8AFF8	-	-	-	-	-	-	-	-	-
TpB_UVB_BPS1_VEP_ALL.xlsx	TpB	UVB	BPS1	10:76403912-76403912	A	intron_variant	MODIFIER	Pcnt	ENSMUSG00000001151	Transcript	ENSMUST00000001179.6	protein_coding	-	19 of 41	ENSMUST00000001179.6:c.3778-38C>T	-	-	-	-	-	-	-	-	-1	-	MGI	-	-	2	P2	CCDS23944.1	ENSMUSP00000001179	-	F8VPV0	UPI0000565249	-	-	-	-	-	-	-	-	-
TpB_UVB_BPS1_VEP_ALL.xlsx	TpB	UVB	BPS1	10:76403913-76403913	A	intron_variant	MODIFIER	Pcnt	ENSMUSG00000001151	Transcript	ENSMUST00000001179.6	protein_coding	-	19 of 41	ENSMUST00000001179.6:c.3778-39C>T	-	-	-	-	-	-	-	-	-1	-	MGI	-	-	2	P2	CCDS23944.1	ENSMUSP00000001179	-	F8VPV0	UPI0000565249	-	-	-	-	-	-	-	-	-
TpB_UVB_BPS1_VEP_ALL.xlsx	TpB	UVB	BPS1	10:76454676-76454676	T	downstream_gene_variant	MODIFIER	Ybey	ENSMUSG00000033126	Transcript	ENSMUST00000049185.5	protein_coding	-	-	-	-	-	-	-	-	-	-	4891	-1	-	MGI	-	-	1	P1	CCDS23946.1	ENSMUSP00000045647	Q8CAV0	-	UPI00000E9594	-	-	-	-	-	-	-	-	-
TpB_UVB_BPS1_VEP_ALL.xlsx	TpB	UVB	BPS1	10:76599725-76599725	A	intron_variant	MODIFIER	Col6a2	ENSMUSG00000020241	Transcript	ENSMUST00000001181.12	protein_coding	-	27 of 27	ENSMUST00000001181.12:c.2507-2914C>T	-	-	-	-	-	-	-	-	-1	-	MGI	-	-	1	P1	CCDS23951.1	ENSMUSP00000001181	Q02788	-	UPI0000028503	-	-	-	-	-	-	-	-	-
TpB_UVB_BPS1_VEP_ALL.xlsx	TpB	UVB	BPS1	10:76599725-76599725	A	missense_variant	MODERATE	Col6a2	ENSMUSG00000020241	Transcript	ENSMUST00000105413.7	protein_coding	28 of 28	-	ENSMUST00000105413.7:c.2675C>T	ENSMUSP00000101053.1:p.Thr892Ile	2763	2675	892	T/I	aCc/aTc	-	-	-1	-	MGI	-	-	1	-	CCDS83715.1	ENSMUSP00000101053	-	D3Z7D5	UPI0000D66B99	tolerated(0.06)	-	-	-	-	-	-	-	-
TpB_UVB_BPS1_VEP_ALL.xlsx	TpB	UVB	BPS1	10:76712906-76712906	T	intron_variant	MODIFIER	Col6a1	ENSMUSG00000001119	Transcript	ENSMUST00000001147.4	protein_coding	-	28 of 34	ENSMUST00000001147.4:c.1811-33T>A	-	-	-	-	-	-	-	-	-1	-	MGI	-	-	1	P1	CCDS23952.1	ENSMUSP00000001147	Q04857	-	UPI000002747E	-	-	-	-	-	-	-	-	-
TpB_UVB_BPS1_VEP_ALL.xlsx	TpB	UVB	BPS1	10:77697235-77697235	A	intron_variant	MODIFIER	Tspear	ENSMUSG00000069581	Transcript	ENSMUST00000092366.3	protein_coding	-	01 of 11	ENSMUST00000092366.3:c.85+10338G>A	-	-	-	-	-	-	-	-	1	-	MGI	-	-	1	P1	CCDS83718.1	ENSMUSP00000090020	J3S6Y1	-	UPI00027ED79C	-	-	-	-	-	-	-	-	-
TpB_UVB_BPS1_VEP_ALL.xlsx	TpB	UVB	BPS1	10:78427427-78427427	T	synonymous_variant	LOW	Cstb	ENSMUSG00000005054	Transcript	ENSMUST00000005185.7	protein_coding	03 of 03	-	ENSMUST00000005185.7:c.285C>T	ENSMUSP00000005185.6:p.Leu95%3D	408	285	95	L	ctC/ctT	-	-	1	-	MGI	-	-	1	P1	CCDS23964.1	ENSMUSP00000005185	Q62426	-	UPI0000003E42	-	-	-	-	-	-	-	-	-
TpB_UVB_BPS1_VEP_ALL.xlsx	TpB	UVB	BPS1	10:78427427-78427427	T	upstream_gene_variant	MODIFIER	4921516A02Rik	ENSMUSG00000112652	Transcript	ENSMUST00000218544.1	antisense	-	-	-	-	-	-	-	-	-	-	844	1	-	MGI	-	-	1	-	-	-	-	-	-	-	-	-	-	-	-	-	-	-
TpB_UVB_BPS1_VEP_ALL.xlsx	TpB	UVB	BPS1	10:79379117-79379117	A	missense_variant	MODERATE	Vmn2r82	ENSMUSG00000091468	Transcript	ENSMUST00000170596.3	protein_coding	03 of 06	-	ENSMUST00000170596.3:c.933T>A	ENSMUSP00000130114.2:p.Asn311Lys	1004	933	311	N/K	aaT/aaA	-	-	1	-	MGI	-	-	5	P1	CCDS48617.1	ENSMUSP00000130114	-	G3UWA2	UPI000154A5E9	tolerated(0.56)	-	-	-	-	-	-	-	-
TpB_UVB_BPS1_VEP_ALL.xlsx	TpB	UVB	BPS1	10:79379117-79379117	A	intron_variant	MODIFIER	Vmn2r82	ENSMUSG00000091468	Transcript	ENSMUST00000232824.1	protein_coding	-	02 of 03	ENSMUST00000232824.1:c.507+1029T>A	-	-	-	-	-	-	-	-	1	-	MGI	-	-	-	-	-	ENSMUSP00000156858	-	A0A3B2WD64	UPI000E6EA0DA	-	-	-	-	-	-	-	-	-
TpB_UVB_BPS1_VEP_ALL.xlsx	TpB	UVB	BPS1	10:79621161-79621161	T	synonymous_variant	LOW	Shc2	ENSMUSG00000020312	Transcript	ENSMUST00000020564.6	protein_coding	12 of 13	-	ENSMUST00000020564.6:c.1620G>A	ENSMUSP00000020564.6:p.Glu540%3D	1688	1620	540	E	gaG/gaA	-	-	-1	-	MGI	-	-	5	P1	CCDS48620.1	ENSMUSP00000020564	Q8BMC3	-	UPI00001C47ED	-	-	-	-	-	-	-	-	-
TpB_UVB_BPS1_VEP_ALL.xlsx	TpB	UVB	BPS1	10:79621161-79621161	T	non_coding_transcript_exon_variant	MODIFIER	Shc2	ENSMUSG00000020312	Transcript	ENSMUST00000166450.1	retained_intron	02 of 03	-	ENSMUST00000166450.1:n.853G>A	-	853	-	-	-	-	-	-	-1	-	MGI	-	-	3	-	-	-	-	-	-	-	-	-	-	-	-	-	-	-
TpB_UVB_BPS1_VEP_ALL.xlsx	TpB	UVB	BPS1	10:80008449-80008449	T	intron_variant	MODIFIER	Abca7	ENSMUSG00000035722	Transcript	ENSMUST00000043866.7	protein_coding	-	29 of 45	ENSMUST00000043866.7:c.4247+17C>T	-	-	-	-	-	-	-	-	1	-	MGI	-	-	1	P3	CCDS24004.1	ENSMUSP00000043090	Q91V24	-	UPI0000029036	-	-	-	-	-	-	-	-	-
TpB_UVB_BPS1_VEP_ALL.xlsx	TpB	UVB	BPS1	10:80834337-80834337	T	missense_variant	MODERATE	Lingo3	ENSMUSG00000051067	Transcript	ENSMUST00000053986.8	protein_coding	02 of 02	-	ENSMUST00000053986.8:c.1758G>A	ENSMUSP00000054960.7:p.Met586Ile	1903	1758	586	M/I	atG/atA	-	-	-1	-	MGI	-	-	1	P1	CCDS24035.1	ENSMUSP00000054960	Q6GQU6	-	UPI00001C47F1	deleterious(0)	-	-	-	-	-	-	-	-
TpB_UVB_BPS1_VEP_ALL.xlsx	TpB	UVB	BPS1	10:80834337-80834337	T	downstream_gene_variant	MODIFIER	Lingo3	ENSMUSG00000051067	Transcript	ENSMUST00000219924.1	protein_coding	-	-	-	-	-	-	-	-	-	-	1654	-1	cds_end_NF	MGI	-	-	3	-	-	ENSMUSP00000151329	-	A0A1W2P6P2	UPI00097CE2E4	-	-	-	-	-	-	-	-	-
TpB_UVB_BPS1_VEP_ALL.xlsx	TpB	UVB	BPS1	10:81081859-81081859	T	splice_region_variant,intron_variant	LOW	Thop1	ENSMUSG00000004929	Transcript	ENSMUST00000005057.6	protein_coding	-	12 of 12	ENSMUST00000005057.6:c.1909-5C>T	-	-	-	-	-	-	-	-	1	-	MGI	-	-	1	P1	CCDS24042.1	ENSMUSP00000005057	-	A0A0R4IZY0	UPI00000E730F	-	-	-	-	-	-	-	-	-
TpB_UVB_BPS1_VEP_ALL.xlsx	TpB	UVB	BPS1	10:81276235-81276235	T	intron_variant	MODIFIER	Tjp3	ENSMUSG00000034917	Transcript	ENSMUST00000045744.6	protein_coding	-	15 of 20	ENSMUST00000045744.6:c.1915+33G>A	-	-	-	-	-	-	-	-	-1	-	MGI	-	-	1	P1	CCDS24051.1	ENSMUSP00000036438	-	Q921G9	UPI00000261AE	-	-	-	-	-	-	-	-	-
TpB_UVB_BPS1_VEP_ALL.xlsx	TpB	UVB	BPS1	10:85388326-85388326	T	missense_variant	MODERATE	Btbd11	ENSMUSG00000020042	Transcript	ENSMUST00000020231.9	protein_coding	01 of 10	-	ENSMUST00000020231.9:c.998C>T	ENSMUSP00000020231.3:p.Ala333Val	1500	998	333	A/V	gCc/gTc	-	-	1	cds_end_NF	MGI	-	-	5	-	-	ENSMUSP00000020231	-	H7BWX5	UPI0001DD344D	tolerated_low_confidence(1)	-	-	-	-	-	-	-	-
TpB_UVB_BPS1_VEP_ALL.xlsx	TpB	UVB	BPS1	10:85388326-85388326	T	regulatory_region_variant	MODIFIER	-	-	RegulatoryFeature	ENSMUSR00000031116	-	-	-	-	-	-	-	-	-	-	-	-	-	-	-	-	-	-	-	-	-	-	-	-	-	-	-	-	-	-	-	-	-
TpB_UVB_BPS1_VEP_ALL.xlsx	TpB	UVB	BPS1	10:85388327-85388327	A	synonymous_variant	LOW	Btbd11	ENSMUSG00000020042	Transcript	ENSMUST00000020231.9	protein_coding	01 of 10	-	ENSMUST00000020231.9:c.999C>A	ENSMUSP00000020231.3:p.Ala333%3D	1501	999	333	A	gcC/gcA	-	-	1	cds_end_NF	MGI	-	-	5	-	-	ENSMUSP00000020231	-	H7BWX5	UPI0001DD344D	-	-	-	-	-	-	-	-	-
TpB_UVB_BPS1_VEP_ALL.xlsx	TpB	UVB	BPS1	10:85388327-85388327	A	regulatory_region_variant	MODIFIER	-	-	RegulatoryFeature	ENSMUSR00000031116	-	-	-	-	-	-	-	-	-	-	-	-	-	-	-	-	-	-	-	-	-	-	-	-	-	-	-	-	-	-	-	-	-
TpB_UVB_BPS1_VEP_ALL.xlsx	TpB	UVB	BPS1	10:85627331-85627331	T	intron_variant	MODIFIER	Btbd11	ENSMUSG00000020042	Transcript	ENSMUST00000020231.9	protein_coding	-	06 of 09	ENSMUST00000020231.9:c.1914+45C>T	-	-	-	-	-	-	-	-	1	cds_end_NF	MGI	-	-	5	-	-	ENSMUSP00000020231	-	H7BWX5	UPI0001DD344D	-	-	-	-	-	-	-	-	-
TpB_UVB_BPS1_VEP_ALL.xlsx	TpB	UVB	BPS1	10:85627332-85627332	C	intron_variant	MODIFIER	Btbd11	ENSMUSG00000020042	Transcript	ENSMUST00000020231.9	protein_coding	-	06 of 09	ENSMUST00000020231.9:c.1914+46T>C	-	-	-	-	-	-	-	-	1	cds_end_NF	MGI	-	-	5	-	-	ENSMUSP00000020231	-	H7BWX5	UPI0001DD344D	-	-	-	-	-	-	-	-	-
TpB_UVB_BPS1_VEP_ALL.xlsx	TpB	UVB	BPS1	10:89606984-89606984	A	intron_variant	MODIFIER	Slc17a8	ENSMUSG00000019935	Transcript	ENSMUST00000020102.13	protein_coding	-	01 of 11	ENSMUST00000020102.13:c.102-116C>T	-	-	-	-	-	-	-	-	-1	-	MGI	-	-	1	P1	CCDS24117.1	ENSMUSP00000020102	Q8BFU8	-	UPI00000EBAA6	-	-	-	-	-	-	-	-	-
TpB_UVB_BPS1_VEP_ALL.xlsx	TpB	UVB	BPS1	10:89640559-89640559	A	synonymous_variant	LOW	Scyl2	ENSMUSG00000069539	Transcript	ENSMUST00000092227.11	protein_coding	18 of 18	-	ENSMUST00000092227.11:c.2700C>T	ENSMUSP00000089874.5:p.Phe900%3D	2959	2700	900	F	ttC/ttT	-	-	-1	-	MGI	-	-	1	A1	CCDS78881.1	ENSMUSP00000089874	-	G5E8J9	UPI00001E538C	-	-	-	-	-	-	-	-	-
TpB_UVB_BPS1_VEP_ALL.xlsx	TpB	UVB	BPS1	10:89640559-89640559	A	non_coding_transcript_exon_variant	MODIFIER	Scyl2	ENSMUSG00000069539	Transcript	ENSMUST00000105294.8	processed_transcript	10 of 10	-	ENSMUST00000105294.8:n.1565C>T	-	1565	-	-	-	-	-	-	-1	-	MGI	-	-	1	-	-	-	-	-	-	-	-	-	-	-	-	-	-	-
TpB_UVB_BPS1_VEP_ALL.xlsx	TpB	UVB	BPS1	10:91018951-91018951	A	intron_variant	MODIFIER	Apaf1	ENSMUSG00000019979	Transcript	ENSMUST00000020157.12	protein_coding	-	20 of 26	ENSMUST00000020157.12:c.2841+15A>T	-	-	-	-	-	-	-	-	-1	-	MGI	-	-	1	P1	CCDS36030.1	ENSMUSP00000020157	O88879	-	UPI00005652F4	-	-	-	-	-	-	-	-	-
TpB_UVB_BPS1_VEP_ALL.xlsx	TpB	UVB	BPS1	10:96002819-96002819	A	intron_variant	MODIFIER	Eea1	ENSMUSG00000036499	Transcript	ENSMUST00000053484.7	protein_coding	-	09 of 28	ENSMUST00000053484.7:c.799-68G>A	-	-	-	-	-	-	-	-	1	-	MGI	-	-	1	P1	CCDS36042.1	ENSMUSP00000061493	Q8BL66	-	UPI00003BA2F9	-	-	-	-	-	-	-	-	-
TpB_UVB_BPS1_VEP_ALL.xlsx	TpB	UVB	BPS1	10:103567784-103567784	T	downstream_gene_variant	MODIFIER	Gm47222	ENSMUSG00000112839	Transcript	ENSMUST00000217758.1	processed_pseudogene	-	-	-	-	-	-	-	-	-	-	1425	-1	-	MGI	-	-	-	-	-	-	-	-	-	-	-	-	-	-	-	-	-	-
TpB_UVB_BPS1_VEP_ALL.xlsx	TpB	UVB	BPS1	10:106819638-106819638	T	intron_variant	MODIFIER	Ppfia2	ENSMUSG00000053825	Transcript	ENSMUST00000029404.16	protein_coding	-	08 of 31	ENSMUST00000029404.16:c.984+81C>T	-	-	-	-	-	-	-	-	1	-	MGI	-	-	1	A1	-	ENSMUSP00000029404	-	F7CYX4	UPI0000232A0F	-	-	-	-	-	-	-	-	-
TpB_UVB_BPS1_VEP_ALL.xlsx	TpB	UVB	BPS1	10:111993690-111993690	T	intron_variant	MODIFIER	Glipr1	ENSMUSG00000056888	Transcript	ENSMUST00000074805.11	protein_coding	-	01 of 05	ENSMUST00000074805.11:c.175-10T>A	-	-	-	-	-	-	-	-	-1	-	MGI	-	-	1	P1	CCDS24169.1	ENSMUSP00000074359	Q9CWG1	Q4QQK5	UPI000002186D	-	-	-	-	-	-	-	-	-
TpB_UVB_BPS1_VEP_ALL.xlsx	TpB	UVB	BPS1	10:112272296-112272296	A	synonymous_variant	LOW	Kcnc2	ENSMUSG00000035681	Transcript	ENSMUST00000092175.3	protein_coding	02 of 05	-	ENSMUST00000092175.3:c.591G>A	ENSMUSP00000089814.3:p.Glu197%3D	657	591	197	E	gaG/gaA	-	-	1	-	MGI	-	-	1	A2	-	ENSMUSP00000089814	Q14B80	-	UPI0000511CE3	-	-	-	-	-	-	-	-	-
TpB_UVB_BPS1_VEP_ALL.xlsx	TpB	UVB	BPS1	10:112272296-112272296	A	regulatory_region_variant	MODIFIER	-	-	RegulatoryFeature	ENSMUSR00000314497	-	-	-	-	-	-	-	-	-	-	-	-	-	-	-	-	-	-	-	-	-	-	-	-	-	-	-	-	-	-	-	-	-
TpB_UVB_BPS1_VEP_ALL.xlsx	TpB	UVB	BPS1	10:115835264-115835264	T	intron_variant	MODIFIER	Tspan8	ENSMUSG00000034127	Transcript	ENSMUST00000035563.14	protein_coding	-	04 of 07	ENSMUST00000035563.14:c.337-12C>T	-	-	-	-	-	-	-	-	1	-	MGI	-	-	1	P1	CCDS24181.1	ENSMUSP00000049243	Q8R3G9	-	UPI0000023C6F	-	-	-	-	-	-	-	-	-
TpB_UVB_BPS1_VEP_ALL.xlsx	TpB	UVB	BPS1	10:116315107-116315107	T	missense_variant	MODERATE	Ptprb	ENSMUSG00000020154	Transcript	ENSMUST00000092167.6	protein_coding	04 of 01	-	ENSMUST00000092167.6:c.673C>T	ENSMUSP00000089805.5:p.Arg225Cys	927	673	225	R/C	Cgt/Tgt	-	-	1	-	MGI	-	-	1	P1	CCDS36063.1	ENSMUSP00000089805	B2RU80	-	UPI000154B1C0	deleterious(0.05)	-	-	-	-	-	-	-	-
TpB_UVB_BPS1_VEP_ALL.xlsx	TpB	UVB	BPS1	10:116315107-116315107	T	non_coding_transcript_exon_variant	MODIFIER	Ptprb	ENSMUSG00000020154	Transcript	ENSMUST00000217925.1	retained_intron	06 of 08	-	ENSMUST00000217925.1:n.1588C>T	-	1588	-	-	-	-	-	-	1	-	MGI	-	-	1	-	-	-	-	-	-	-	-	-	-	-	-	-	-	-
TpB_UVB_BPS1_VEP_ALL.xlsx	TpB	UVB	BPS1	10:117278494-117278494	A	intron_variant	MODIFIER	Lyz2	ENSMUSG00000069516	Transcript	ENSMUST00000092163.8	protein_coding	-	03 of 03	ENSMUST00000092163.8:c.380+149C>T	-	-	-	-	-	-	-	-	-1	-	MGI	-	-	1	P1	CCDS48694.1	ENSMUSP00000089801	P08905	A0A077S2U6	UPI0000026750	-	-	-	-	-	-	-	-	-
TpB_UVB_BPS1_VEP_ALL.xlsx	TpB	UVB	BPS1	10:117280660-117280660	A	synonymous_variant	LOW	Lyz2	ENSMUSG00000069516	Transcript	ENSMUST00000092163.8	protein_coding	02 of 04	-	ENSMUST00000092163.8:c.282C>T	ENSMUSP00000089801.7:p.Ala94%3D	361	282	94	A	gcC/gcT	-	-	-1	-	MGI	-	-	1	P1	CCDS48694.1	ENSMUSP00000089801	P08905	A0A077S2U6	UPI0000026750	-	-	-	-	-	-	-	-	-
TpB_UVB_BPS1_VEP_ALL.xlsx	TpB	UVB	BPS1	10:117280660-117280660	A	regulatory_region_variant	MODIFIER	-	-	RegulatoryFeature	ENSMUSR00000314792	-	-	-	-	-	-	-	-	-	-	-	-	-	-	-	-	-	-	-	-	-	-	-	-	-	-	-	-	-	-	-	-	-
TpB_UVB_BPS1_VEP_ALL.xlsx	TpB	UVB	BPS1	10:117280661-117280661	A	missense_variant	MODERATE	Lyz2	ENSMUSG00000069516	Transcript	ENSMUST00000092163.8	protein_coding	02 of 04	-	ENSMUST00000092163.8:c.281C>T	ENSMUSP00000089801.7:p.Ala94Val	360	281	94	A/V	gCc/gTc	-	-	-1	-	MGI	-	-	1	P1	CCDS48694.1	ENSMUSP00000089801	P08905	A0A077S2U6	UPI0000026750	tolerated(0.09)	-	-	-	-	-	-	-	-
TpB_UVB_BPS1_VEP_ALL.xlsx	TpB	UVB	BPS1	10:117280661-117280661	A	regulatory_region_variant	MODIFIER	-	-	RegulatoryFeature	ENSMUSR00000314792	-	-	-	-	-	-	-	-	-	-	-	-	-	-	-	-	-	-	-	-	-	-	-	-	-	-	-	-	-	-	-	-	-
TpB_UVB_BPS1_VEP_ALL.xlsx	TpB	UVB	BPS1	10:117670204-117670204	G	missense_variant	MODERATE	Cpm	ENSMUSG00000020183	Transcript	ENSMUST00000020399.5	protein_coding	05 of 09	-	ENSMUST00000020399.5:c.469C>G	ENSMUSP00000020399.5:p.Pro157Ala	500	469	157	P/A	Cct/Gct	-	-	1	-	MGI	-	-	1	P1	CCDS48696.1	ENSMUSP00000020399	Q80V42	-	UPI0000354026	deleterious(0)	-	-	-	-	-	-	-	-
TpB_UVB_BPS1_VEP_ALL.xlsx	TpB	UVB	BPS1	10:117670204-117670204	G	downstream_gene_variant	MODIFIER	Cpm	ENSMUSG00000020183	Transcript	ENSMUST00000123374.7	retained_intron	-	-	-	-	-	-	-	-	-	-	1968	1	-	MGI	-	-	3	-	-	-	-	-	-	-	-	-	-	-	-	-	-	-
TpB_UVB_BPS1_VEP_ALL.xlsx	TpB	UVB	BPS1	10:119938372-119938372	G	intron_variant	MODIFIER	Grip1	ENSMUSG00000034813	Transcript	ENSMUST00000041962.15	protein_coding	-	05 of 22	ENSMUST00000041962.15:c.505+45T>G	-	-	-	-	-	-	-	-	1	-	MGI	-	-	1	A2	CCDS70112.1	ENSMUSP00000042436	-	H7BX09	UPI000058A088	-	-	-	-	-	-	-	-	-
TpB_UVB_BPS1_VEP_ALL.xlsx	TpB	UVB	BPS1	10:120018220-120018220	C	intron_variant	MODIFIER	Grip1	ENSMUSG00000034813	Transcript	ENSMUST00000041962.15	protein_coding	-	14 of 22	ENSMUST00000041962.15:c.1682+78T>C	-	-	-	-	-	-	-	-	1	-	MGI	-	-	1	A2	CCDS70112.1	ENSMUSP00000042436	-	H7BX09	UPI000058A088	-	-	-	-	-	-	-	-	-
TpB_UVB_BPS1_VEP_ALL.xlsx	TpB	UVB	BPS1	10:121275725-121275725	C	splice_region_variant,intron_variant	LOW	Tbc1d30	ENSMUSG00000052302	Transcript	ENSMUST00000064107.6	protein_coding	-	10 of 11	ENSMUST00000064107.6:c.1294+3A>G	-	-	-	-	-	-	-	-	-1	-	MGI	-	-	1	P1	CCDS48704.1	ENSMUSP00000070488	Q69ZT9	-	UPI0000511EAE	-	-	-	-	-	-	-	-	-
TpB_UVB_BPS1_VEP_ALL.xlsx	TpB	UVB	BPS1	10:123009483-123009483	A	intron_variant	MODIFIER	Mon2	ENSMUSG00000034602	Transcript	ENSMUST00000037557.8	protein_coding	-	28 of 33	ENSMUST00000037557.8:c.4296+20C>T	-	-	-	-	-	-	-	-	-1	-	MGI	-	-	1	P3	CCDS24216.1	ENSMUSP00000037568	Q80TL7	-	UPI000024E156	-	-	-	-	-	-	-	-	-
TpB_UVB_BPS1_VEP_ALL.xlsx	TpB	UVB	BPS1	10:128241263-128241263	T	intron_variant	MODIFIER	Timeless	ENSMUSG00000039994	Transcript	ENSMUST00000055539.10	protein_coding	-	05 of 28	ENSMUST00000055539.10:c.430-12C>T	-	-	-	-	-	-	-	-	1	-	MGI	-	-	1	P3	CCDS24266.1	ENSMUSP00000058021	Q9R1X4	-	UPI0000025B86	-	-	-	-	-	-	-	-	-
TpB_UVB_BPS1_VEP_ALL.xlsx	TpB	UVB	BPS1	10:128244583-128244583	T	intron_variant	MODIFIER	Timeless	ENSMUSG00000039994	Transcript	ENSMUST00000055539.10	protein_coding	-	12 of 28	ENSMUST00000055539.10:c.1408+42C>T	-	-	-	-	-	-	-	-	1	-	MGI	-	-	1	P3	CCDS24266.1	ENSMUSP00000058021	Q9R1X4	-	UPI0000025B86	-	-	-	-	-	-	-	-	-
TpB_UVB_BPS1_VEP_ALL.xlsx	TpB	UVB	BPS1	10:128255121-128255121	T	downstream_gene_variant	MODIFIER	Timeless	ENSMUSG00000039994	Transcript	ENSMUST00000055539.10	protein_coding	-	-	-	-	-	-	-	-	-	-	2180	1	-	MGI	-	-	1	P3	CCDS24266.1	ENSMUSP00000058021	Q9R1X4	-	UPI0000025B86	-	-	-	-	-	-	-	-	-
TpB_UVB_BPS1_VEP_ALL.xlsx	TpB	UVB	BPS1	10:128255121-128255121	T	stop_gained	HIGH	Apon	ENSMUSG00000051716	Transcript	ENSMUST00000060782.4	protein_coding	02 of 02	-	ENSMUST00000060782.4:c.667C>T	ENSMUSP00000059142.3:p.Arg223Ter	873	667	223	R/*	Cga/Tga	-	-	1	-	MGI	-	-	2	P1	CCDS24267.1	ENSMUSP00000059142	-	G3X9D6	UPI0000025ADB	-	-	-	-	-	-	-	-	-
TpB_UVB_BPS1_VEP_ALL.xlsx	TpB	UVB	BPS1	10:128522976-128522976	A	intron_variant	MODIFIER	Esyt1	ENSMUSG00000025366	Transcript	ENSMUST00000026427.7	protein_coding	-	02 of 01	ENSMUST00000026427.7:c.402+98C>T	-	-	-	-	-	-	-	-	-1	-	MGI	-	-	1	P1	CCDS24280.1	ENSMUSP00000026427	Q3U7R1	-	UPI000002942E	-	-	-	-	-	-	-	-	-
TpB_UVB_BPS1_VEP_ALL.xlsx	TpB	UVB	BPS1	10:128522977-128522977	A	intron_variant	MODIFIER	Esyt1	ENSMUSG00000025366	Transcript	ENSMUST00000026427.7	protein_coding	-	02 of 01	ENSMUST00000026427.7:c.402+97C>T	-	-	-	-	-	-	-	-	-1	-	MGI	-	-	1	P1	CCDS24280.1	ENSMUSP00000026427	Q3U7R1	-	UPI000002942E	-	-	-	-	-	-	-	-	-
TpB_UVB_BPS1_VEP_ALL.xlsx	TpB	UVB	BPS1	10:129250908-129250908	C	missense_variant	MODERATE	Olfr775	ENSMUSG00000096220	Transcript	ENSMUST00000097163.2	protein_coding	01 of 01	-	ENSMUST00000097163.2:c.373T>C	ENSMUSP00000132845.1:p.Cys125Arg	373	373	125	C/R	Tgt/Cgt	-	-	1	-	MGI	-	-	-	P1	CCDS48733.1	ENSMUSP00000132845	-	Q7TRI4	UPI0000195C20	deleterious_low_confidence(0)	-	-	-	-	-	-	-	-
TpB_UVB_BPS1_VEP_ALL.xlsx	TpB	UVB	BPS1	10:129250909-129250909	T	missense_variant	MODERATE	Olfr775	ENSMUSG00000096220	Transcript	ENSMUST00000097163.2	protein_coding	01 of 01	-	ENSMUST00000097163.2:c.374G>T	ENSMUSP00000132845.1:p.Cys125Phe	374	374	125	C/F	tGt/tTt	-	-	1	-	MGI	-	-	-	P1	CCDS48733.1	ENSMUSP00000132845	-	Q7TRI4	UPI0000195C20	deleterious_low_confidence(0)	-	-	-	-	-	-	-	-
TpB_UVB_BPS1_VEP_ALL.xlsx	TpB	UVB	BPS1	10:130413044-130413044	C	non_coding_transcript_exon_variant	MODIFIER	Ctdsp2-ps	ENSMUSG00000040540	Transcript	ENSMUST00000075147.5	processed_pseudogene	01 of 01	-	ENSMUST00000075147.5:n.546T>C	-	546	-	-	-	-	-	-	1	-	MGI	-	-	-	-	-	-	-	-	-	-	-	-	-	-	-	-	-	-
TpB_UVB_BPS1_VEP_ALL.xlsx	TpB	UVB	BPS1	11:3193225-3193225	T	intron_variant	MODIFIER	Sfi1	ENSMUSG00000023764	Transcript	ENSMUST00000066391.13	protein_coding	-	01 of 31	ENSMUST00000066391.13:c.-94+135C>A	-	-	-	-	-	-	-	-	-1	-	MGI	-	-	5	A2	-	ENSMUSP00000067261	Q3UZY0	-	UPI0000470E52	-	-	-	-	-	-	-	-	-
TpB_UVB_BPS1_VEP_ALL.xlsx	TpB	UVB	BPS1	11:3438390-3438390	T	intron_variant	MODIFIER	Rnf185	ENSMUSG00000020448	Transcript	ENSMUST00000064364.2	protein_coding	-	01 of 07	ENSMUST00000064364.2:c.-56-67G>A	-	-	-	-	-	-	-	-	-1	-	MGI	-	-	1	-	CCDS24361.1	ENSMUSP00000067053	Q91YT2	-	UPI0000003FDA	-	-	-	-	-	-	-	-	-
TpB_UVB_BPS1_VEP_ALL.xlsx	TpB	UVB	BPS1	11:3676746-3676746	T	missense_variant	MODERATE	Morc2a	ENSMUSG00000034543	Transcript	ENSMUST00000093389.8	protein_coding	10 of 27	-	ENSMUST00000093389.8:c.803C>T	ENSMUSP00000091087.2:p.Ser268Phe	1528	803	268	S/F	tCc/tTc	-	-	1	-	MGI	-	-	1	P1	CCDS48741.1	ENSMUSP00000091087	Q69ZX6	-	UPI00002147AD	tolerated(0.73)	-	-	-	-	-	-	-	-
TpB_UVB_BPS1_VEP_ALL.xlsx	TpB	UVB	BPS1	11:3676746-3676746	T	upstream_gene_variant	MODIFIER	Morc2a	ENSMUSG00000034543	Transcript	ENSMUST00000126035.7	processed_transcript	-	-	-	-	-	-	-	-	-	-	3161	1	-	MGI	-	-	3	-	-	-	-	-	-	-	-	-	-	-	-	-	-	-
TpB_UVB_BPS1_VEP_ALL.xlsx	TpB	UVB	BPS1	11:3705282-3705282	T	intron_variant	MODIFIER	Osbp2	ENSMUSG00000020435	Transcript	ENSMUST00000070552.13	protein_coding	-	13 of 13	ENSMUST00000070552.13:c.2585-75G>A	-	-	-	-	-	-	-	-	-1	-	MGI	-	-	5	P3	CCDS24367.1	ENSMUSP00000068652	Q5QNQ6	-	UPI0000470581	-	-	-	-	-	-	-	-	-
TpB_UVB_BPS1_VEP_ALL.xlsx	TpB	UVB	BPS1	11:3717173-3717173	T	missense_variant	MODERATE	Osbp2	ENSMUSG00000020435	Transcript	ENSMUST00000070552.13	protein_coding	05 of 14	-	ENSMUST00000070552.13:c.1336G>A	ENSMUSP00000068652.7:p.Glu446Lys	1372	1336	446	E/K	Gaa/Aaa	-	-	-1	-	MGI	-	-	5	P3	CCDS24367.1	ENSMUSP00000068652	Q5QNQ6	-	UPI0000470581	deleterious(0.03)	-	-	-	-	-	-	-	-
TpB_UVB_BPS1_VEP_ALL.xlsx	TpB	UVB	BPS1	11:3717173-3717173	T	5_prime_UTR_variant	MODIFIER	Osbp2	ENSMUSG00000020435	Transcript	ENSMUST00000102950.9	protein_coding	03 of 12	-	ENSMUST00000102950.9:c.-24G>A	-	352	-	-	-	-	-	-	-1	-	MGI	-	-	1	A2	CCDS78912.1	ENSMUSP00000100015	-	Q8K0C7	UPI00000280E5	-	-	-	-	-	-	-	-	-
TpB_UVB_BPS1_VEP_ALL.xlsx	TpB	UVB	BPS1	11:4042248-4042248	T	stop_gained	HIGH	Sec14l4	ENSMUSG00000019368	Transcript	ENSMUST00000019512.7	protein_coding	07 of 12	-	ENSMUST00000019512.7:c.577C>T	ENSMUSP00000019512.7:p.Arg193Ter	640	577	193	R/*	Cga/Tga	-	-	1	-	MGI	-	-	1	P1	CCDS24374.1	ENSMUSP00000019512	Q8R0F9	-	UPI0000027C34	-	-	-	-	-	-	-	-	-
TpB_UVB_BPS1_VEP_ALL.xlsx	TpB	UVB	BPS1	11:4042248-4042248	T	non_coding_transcript_exon_variant	MODIFIER	Sec14l4	ENSMUSG00000019368	Transcript	ENSMUST00000125351.7	processed_transcript	05 of 10	-	ENSMUST00000125351.7:n.445C>T	-	445	-	-	-	-	-	-	1	-	MGI	-	-	5	-	-	-	-	-	-	-	-	-	-	-	-	-	-	-
TpB_UVB_BPS1_VEP_ALL.xlsx	TpB	UVB	BPS1	11:4205871-4205871	T	intron_variant	MODIFIER	Tbc1d10a	ENSMUSG00000034412	Transcript	ENSMUST00000041042.12	protein_coding	-	02 of 08	ENSMUST00000041042.12:c.411+15C>T	-	-	-	-	-	-	-	-	1	-	MGI	-	-	1	A2	-	ENSMUSP00000036861	-	Q5SPX8	UPI0000470598	-	-	-	-	-	-	-	-	-
TpB_UVB_BPS1_VEP_ALL.xlsx	TpB	UVB	BPS1	11:5868702-5868702	T	downstream_gene_variant	MODIFIER	Pold2	ENSMUSG00000020471	Transcript	ENSMUST00000102922.9	protein_coding	-	-	-	-	-	-	-	-	-	-	3478	-1	-	MGI	-	-	1	P1	CCDS24407.1	ENSMUSP00000099986	O35654	-	UPI000002192A	-	-	-	-	-	-	-	-	-
TpB_UVB_BPS1_VEP_ALL.xlsx	TpB	UVB	BPS1	11:5909066-5909066	T	intron_variant	MODIFIER	Gck	ENSMUSG00000041798	Transcript	ENSMUST00000102920.3	protein_coding	-	04 of 09	ENSMUST00000102920.3:c.483+17G>A	-	-	-	-	-	-	-	-	-1	-	MGI	-	-	1	P1	CCDS24409.1	ENSMUSP00000099984	P52792	Q5SVI5	UPI00000297AD	-	-	-	-	-	-	-	-	-
TpB_UVB_BPS1_VEP_ALL.xlsx	TpB	UVB	BPS1	11:6228119-6228119	T	synonymous_variant	LOW	Npc1l1	ENSMUSG00000020447	Transcript	ENSMUST00000004505.2	protein_coding	02 of 19	-	ENSMUST00000004505.2:c.1290G>A	ENSMUSP00000004505.2:p.Lys430%3D	1310	1290	430	K	aaG/aaA	-	-	-1	-	MGI	-	-	1	P1	CCDS24413.1	ENSMUSP00000004505	-	Z4YJC9	UPI00001C4A06	-	-	-	-	-	-	-	-	-
TpB_UVB_BPS1_VEP_ALL.xlsx	TpB	UVB	BPS1	11:6785745-6785745	T	upstream_gene_variant	MODIFIER	Gm11977	ENSMUSG00000083819	Transcript	ENSMUST00000118511.1	processed_pseudogene	-	-	-	-	-	-	-	-	-	-	2607	-1	-	MGI	-	-	-	-	-	-	-	-	-	-	-	-	-	-	-	-	-	-
TpB_UVB_BPS1_VEP_ALL.xlsx	TpB	UVB	BPS1	11:6786216-6786216	T	upstream_gene_variant	MODIFIER	Gm11977	ENSMUSG00000083819	Transcript	ENSMUST00000118511.1	processed_pseudogene	-	-	-	-	-	-	-	-	-	-	3078	-1	-	MGI	-	-	-	-	-	-	-	-	-	-	-	-	-	-	-	-	-	-
TpB_UVB_BPS1_VEP_ALL.xlsx	TpB	UVB	BPS1	11:7146665-7146665	T	intron_variant	MODIFIER	Adcy1	ENSMUSG00000020431	Transcript	ENSMUST00000020706.4	protein_coding	-	11 of 19	ENSMUST00000020706.4:c.1980+72C>T	-	-	-	-	-	-	-	-	1	-	MGI	-	-	2	P1	CCDS24426.1	ENSMUSP00000020706	O88444	-	UPI0000470555	-	-	-	-	-	-	-	-	-
TpB_UVB_BPS1_VEP_ALL.xlsx	TpB	UVB	BPS1	11:7199698-7199698	T	intron_variant	MODIFIER	Igfbp1	ENSMUSG00000020429	Transcript	ENSMUST00000020704.7	protein_coding	-	01 of 03	ENSMUST00000020704.7:c.374-36C>T	-	-	-	-	-	-	-	-	1	-	MGI	-	-	1	P1	CCDS24427.1	ENSMUSP00000020704	P47876	-	UPI0000192B43	-	-	-	-	-	-	-	-	-
TpB_UVB_BPS1_VEP_ALL.xlsx	TpB	UVB	BPS1	11:8931610-8931610	T	missense_variant	MODERATE	Pkd1l1	ENSMUSG00000046634	Transcript	ENSMUST00000154153.7	protein_coding	15 of 50	-	ENSMUST00000154153.7:c.2666G>A	ENSMUSP00000120803.1:p.Arg889Gln	2664	2666	889	R/Q	cGa/cAa	-	-	-1	cds_start_NF	MGI	-	-	5	P5	-	ENSMUSP00000120803	-	A0A0A0MQK4	UPI000059DC28	tolerated(1)	-	-	-	-	-	-	-	-
TpB_UVB_BPS1_VEP_ALL.xlsx	TpB	UVB	BPS1	11:9039598-9039598	T	upstream_gene_variant	MODIFIER	Sun3	ENSMUSG00000040985	Transcript	ENSMUST00000043377.5	protein_coding	-	-	-	-	-	-	-	-	-	-	9	-1	-	MGI	-	-	1	A2	CCDS70140.1	ENSMUSP00000045199	Q5SS91	E9LV81	UPI00001E6ED8	-	-	-	-	-	-	-	-	-
TpB_UVB_BPS1_VEP_ALL.xlsx	TpB	UVB	BPS1	11:9068487-9068487	T	3_prime_UTR_variant	MODIFIER	Gm11992	ENSMUSG00000040978	Transcript	ENSMUST00000043285.4	protein_coding	07 of 07	-	ENSMUST00000043285.4:c.*103C>T	-	1531	-	-	-	-	-	-	1	-	MGI	-	-	1	P1	CCDS24431.1	ENSMUSP00000039806	Q5SS90	B2RVL0	UPI00001E6ED9	-	-	-	-	-	-	-	-	-
TpB_UVB_BPS1_VEP_ALL.xlsx	TpB	UVB	BPS1	11:9149844-9149844	T	non_coding_transcript_exon_variant	MODIFIER	Gm11993	ENSMUSG00000101841	Transcript	ENSMUST00000121861.1	processed_pseudogene	01 of 01	-	ENSMUST00000121861.1:n.754G>A	-	754	-	-	-	-	-	-	-1	-	MGI	-	-	-	-	-	-	-	-	-	-	-	-	-	-	-	-	-	-
TpB_UVB_BPS1_VEP_ALL.xlsx	TpB	UVB	BPS1	11:9328003-9328003	T	intron_variant	MODIFIER	Abca13	ENSMUSG00000004668	Transcript	ENSMUST00000042740.12	protein_coding	-	23 of 61	ENSMUST00000042740.12:c.9226-44C>T	-	-	-	-	-	-	-	-	1	-	MGI	-	-	5	P1	CCDS36110.1	ENSMUSP00000040465	Q5SSE9	-	UPI0000470695	-	-	-	-	-	-	-	-	-
TpB_UVB_BPS1_VEP_ALL.xlsx	TpB	UVB	BPS1	11:9622064-9622064	T	intron_variant	MODIFIER	Abca13	ENSMUSG00000004668	Transcript	ENSMUST00000042740.12	protein_coding	-	57 of 61	ENSMUST00000042740.12:c.14565+59C>T	-	-	-	-	-	-	-	-	1	-	MGI	-	-	5	P1	CCDS36110.1	ENSMUSP00000040465	Q5SSE9	-	UPI0000470695	-	-	-	-	-	-	-	-	-
TpB_UVB_BPS1_VEP_ALL.xlsx	TpB	UVB	BPS1	11:9737274-9737274	T	non_coding_transcript_exon_variant	MODIFIER	Eif3s6-ps1	ENSMUSG00000081629	Transcript	ENSMUST00000117907.1	processed_pseudogene	01 of 01	-	ENSMUST00000117907.1:n.348G>A	-	348	-	-	-	-	-	-	-1	-	MGI	-	-	-	-	-	-	-	-	-	-	-	-	-	-	-	-	-	-
TpB_UVB_BPS1_VEP_ALL.xlsx	TpB	UVB	BPS1	11:14669351-14669351	T	intergenic_variant	MODIFIER	-	-	-	-	-	-	-	-	-	-	-	-	-	-	-	-	-	-	-	-	-	-	-	-	-	-	-	-	-	-	-	-	-	-	-	-	-
TpB_UVB_BPS1_VEP_ALL.xlsx	TpB	UVB	BPS1	11:17078324-17078324	T	intron_variant	MODIFIER	Cnrip1	ENSMUSG00000044629	Transcript	ENSMUST00000058159.5	protein_coding	-	02 of 02	ENSMUST00000058159.5:c.331-76C>T	-	-	-	-	-	-	-	-	1	-	MGI	-	-	1	P1	CCDS24447.1	ENSMUSP00000050036	Q5M8N0	-	UPI00001E46B1	-	-	-	-	-	-	-	-	-
TpB_UVB_BPS1_VEP_ALL.xlsx	TpB	UVB	BPS1	11:17940224-17940224	T	3_prime_UTR_variant	MODIFIER	Etaa1	ENSMUSG00000016984	Transcript	ENSMUST00000076661.6	protein_coding	06 of 06	-	ENSMUST00000076661.6:c.*2G>A	-	2717	-	-	-	-	-	-	-1	-	MGI	-	-	1	P1	CCDS24452.1	ENSMUSP00000075957	Q5SVT3	-	UPI0000192A41	-	-	-	-	-	-	-	-	-
TpB_UVB_BPS1_VEP_ALL.xlsx	TpB	UVB	BPS1	11:17974603-17974603	A	non_coding_transcript_exon_variant	MODIFIER	Gm12017	ENSMUSG00000084413	Transcript	ENSMUST00000122453.1	processed_pseudogene	01 of 01	-	ENSMUST00000122453.1:n.188A>T	-	188	-	-	-	-	-	-	-1	-	MGI	-	-	-	-	-	-	-	-	-	-	-	-	-	-	-	-	-	-
TpB_UVB_BPS1_VEP_ALL.xlsx	TpB	UVB	BPS1	11:18577324-18577324	T	non_coding_transcript_exon_variant	MODIFIER	Gm12024	ENSMUSG00000081101	Transcript	ENSMUST00000118819.1	processed_pseudogene	01 of 01	-	ENSMUST00000118819.1:n.1156G>A	-	1156	-	-	-	-	-	-	-1	-	MGI	-	-	-	-	-	-	-	-	-	-	-	-	-	-	-	-	-	-
TpB_UVB_BPS1_VEP_ALL.xlsx	TpB	UVB	BPS1	11:21268784-21268784	A	splice_acceptor_variant	HIGH	Vps54	ENSMUSG00000020128	Transcript	ENSMUST00000006221.13	protein_coding	-	03 of 22	ENSMUST00000006221.13:c.379-1G>A	-	-	-	-	-	-	-	-	1	-	MGI	-	-	1	P3	CCDS24463.1	ENSMUSP00000006221	Q5SPW0	-	UPI0000020F2F	-	-	-	-	-	-	-	-	-
TpB_UVB_BPS1_VEP_ALL.xlsx	TpB	UVB	BPS1	11:22589821-22589821	T	regulatory_region_variant	MODIFIER	-	-	RegulatoryFeature	ENSMUSR00000039163	-	-	-	-	-	-	-	-	-	-	-	-	-	-	-	-	-	-	-	-	-	-	-	-	-	-	-	-	-	-	-	-	-
TpB_UVB_BPS1_VEP_ALL.xlsx	TpB	UVB	BPS1	11:23464066-23464066	A	downstream_gene_variant	MODIFIER	Usp34	ENSMUSG00000056342	Transcript	ENSMUST00000129521.7	processed_transcript	-	-	-	-	-	-	-	-	-	-	3169	1	-	MGI	-	-	5	-	-	-	-	-	-	-	-	-	-	-	-	-	-	-
TpB_UVB_BPS1_VEP_ALL.xlsx	TpB	UVB	BPS1	11:23590100-23590100	A	intron_variant	MODIFIER	0610010F05Rik	ENSMUSG00000042208	Transcript	ENSMUST00000043356.12	protein_coding	-	12 of 19	ENSMUST00000043356.12:c.1612-117G>T	-	-	-	-	-	-	-	-	-1	-	MGI	-	-	5	P2	CCDS36119.1	ENSMUSP00000044265	Q68FF0	-	UPI00001E6FF2	-	-	-	-	-	-	-	-	-
TpB_UVB_BPS1_VEP_ALL.xlsx	TpB	UVB	BPS1	11:30506375-30506375	T	missense_variant	MODERATE	Acyp2	ENSMUSG00000060923	Transcript	ENSMUST00000074613.3	protein_coding	04 of 04	-	ENSMUST00000074613.3:c.271G>A	ENSMUSP00000074195.3:p.Glu91Lys	479	271	91	E/K	Gaa/Aaa	-	-	-1	-	MGI	-	-	1	P1	CCDS24507.1	ENSMUSP00000074195	P56375	-	UPI0000003ECD	deleterious(0.02)	-	-	-	-	-	-	-	-
TpB_UVB_BPS1_VEP_ALL.xlsx	TpB	UVB	BPS1	11:32278053-32278053	T	3_prime_UTR_variant	MODIFIER	Hba-x	ENSMUSG00000055609	Transcript	ENSMUST00000020531.8	protein_coding	03 of 03	-	ENSMUST00000020531.8:c.*45C>T	-	738	-	-	-	-	-	-	1	-	MGI	-	-	1	P1	CCDS24522.1	ENSMUSP00000020531	P06467	Q78PA4	UPI0000000D58	-	-	-	-	-	-	-	-	-
TpB_UVB_BPS1_VEP_ALL.xlsx	TpB	UVB	BPS1	11:34068358-34068358	C	intron_variant	MODIFIER	Lcp2	ENSMUSG00000002699	Transcript	ENSMUST00000052413.11	protein_coding	-	03 of 20	ENSMUST00000052413.11:c.189-56A>C	-	-	-	-	-	-	-	-	1	-	MGI	-	-	1	P2	CCDS48768.1	ENSMUSP00000056621	Q60787	-	UPI00000E8866	-	-	-	-	-	-	-	-	-
TpB_UVB_BPS1_VEP_ALL.xlsx	TpB	UVB	BPS1	11:34254435-34254435	T	missense_variant	MODERATE	Dock2	ENSMUSG00000020143	Transcript	ENSMUST00000093193.11	protein_coding	41 of 52	-	ENSMUST00000093193.11:c.4106G>A	ENSMUSP00000090884.5:p.Arg1369Gln	4175	4106	1369	R/Q	cGa/cAa	-	-	-1	-	MGI	-	-	1	P1	CCDS83791.1	ENSMUSP00000090884	Q8C3J5	-	UPI0000192B07	deleterious(0.01)	-	-	-	-	-	-	-	-
TpB_UVB_BPS1_VEP_ALL.xlsx	TpB	UVB	BPS1	11:36163737-36163737	G	missense_variant	MODERATE	Tenm2	ENSMUSG00000049336	Transcript	ENSMUST00000057207.5	protein_coding	09 of 29	-	ENSMUST00000057207.5:c.1795G>C	ENSMUSP00000052014.5:p.Gly599Arg	1795	1795	599	G/R	Ggt/Cgt	-	-	-1	-	MGI	-	-	5	A1	-	ENSMUSP00000052014	-	A0A0A0MQ92	UPI0000020AAD	deleterious(0)	-	-	-	-	-	-	-	-
TpB_UVB_BPS1_VEP_ALL.xlsx	TpB	UVB	BPS1	11:36163737-36163737	G	non_coding_transcript_exon_variant	MODIFIER	Tenm2	ENSMUSG00000049336	Transcript	ENSMUST00000146113.7	processed_transcript	09 of 11	-	ENSMUST00000146113.7:n.1795G>C	-	1795	-	-	-	-	-	-	-1	-	MGI	-	-	5	-	-	-	-	-	-	-	-	-	-	-	-	-	-	-
TpB_UVB_BPS1_VEP_ALL.xlsx	TpB	UVB	BPS1	11:42529289-42529289	T	intron_variant	MODIFIER	Gabrb2	ENSMUSG00000007653	Transcript	ENSMUST00000007797.9	protein_coding	-	05 of 09	ENSMUST00000007797.9:c.459-123C>T	-	-	-	-	-	-	-	-	1	-	MGI	-	-	1	P2	CCDS24555.1	ENSMUSP00000007797	P63137	-	UPI00000041E5	-	-	-	-	-	-	-	-	-
TpB_UVB_BPS1_VEP_ALL.xlsx	TpB	UVB	BPS1	11:42626825-42626825	T	synonymous_variant	LOW	Gabrb2	ENSMUSG00000007653	Transcript	ENSMUST00000007797.9	protein_coding	10 of 10	-	ENSMUST00000007797.9:c.1359C>T	ENSMUSP00000007797.4:p.Ser453%3D	1786	1359	453	S	tcC/tcT	-	-	1	-	MGI	-	-	1	P2	CCDS24555.1	ENSMUSP00000007797	P63137	-	UPI00000041E5	-	-	-	-	-	-	-	-	-
TpB_UVB_BPS1_VEP_ALL.xlsx	TpB	UVB	BPS1	11:43245439-43245439	T	synonymous_variant	LOW	Atp10b	ENSMUSG00000055415	Transcript	ENSMUST00000077659.5	protein_coding	18 of 22	-	ENSMUST00000077659.5:c.3393C>T	ENSMUSP00000076844.5:p.Phe1131%3D	3409	3393	1131	F	ttC/ttT	-	-	1	-	MGI	-	-	5	P2	CCDS36129.1	ENSMUSP00000076844	-	B1AWN4	UPI0000470592	-	-	-	-	-	-	-	-	-
TpB_UVB_BPS1_VEP_ALL.xlsx	TpB	UVB	BPS1	11:43245439-43245439	T	intron_variant,non_coding_transcript_variant	MODIFIER	Gm12146	ENSMUSG00000085533	Transcript	ENSMUST00000127604.1	antisense	-	03 of 03	ENSMUST00000127604.1:n.361+8104G>A	-	-	-	-	-	-	-	-	-1	-	MGI	-	-	3	-	-	-	-	-	-	-	-	-	-	-	-	-	-	-
TpB_UVB_BPS1_VEP_ALL.xlsx	TpB	UVB	BPS1	11:46671054-46671054	A	intron_variant	MODIFIER	Timd2	ENSMUSG00000040413	Transcript	ENSMUST00000055102.12	protein_coding	-	08 of 08	ENSMUST00000055102.12:c.798-36C>T	-	-	-	-	-	-	-	-	-1	-	MGI	-	-	1	P1	CCDS24582.1	ENSMUSP00000060891	-	A8C1R4	UPI00000268C1	-	-	-	-	-	-	-	-	-
TpB_UVB_BPS1_VEP_ALL.xlsx	TpB	UVB	BPS1	11:48753547-48753547	T	non_coding_transcript_exon_variant	MODIFIER	Gm12183	ENSMUSG00000082454	Transcript	ENSMUST00000120566.1	processed_pseudogene	01 of 01	-	ENSMUST00000120566.1:n.168G>A	-	168	-	-	-	-	-	-	-1	-	MGI	-	-	-	-	-	-	-	-	-	-	-	-	-	-	-	-	-	-
TpB_UVB_BPS1_VEP_ALL.xlsx	TpB	UVB	BPS1	11:49169399-49169399	T	stop_gained	HIGH	Btnl9	ENSMUSG00000040283	Transcript	ENSMUST00000046522.12	protein_coding	10 of 10	-	ENSMUST00000046522.12:c.1266G>A	ENSMUSP00000046229.6:p.Trp422Ter	1459	1266	422	W/*	tgG/tgA	-	-	-1	-	MGI	-	-	1	P2	CCDS24600.1	ENSMUSP00000046229	Q8BJE2	-	UPI00000273CA	-	-	-	-	-	-	-	-	-
TpB_UVB_BPS1_VEP_ALL.xlsx	TpB	UVB	BPS1	11:49169399-49169399	T	non_coding_transcript_exon_variant	MODIFIER	Btnl9	ENSMUSG00000040283	Transcript	ENSMUST00000131363.1	retained_intron	02 of 02	-	ENSMUST00000131363.1:n.372G>A	-	372	-	-	-	-	-	-	-1	-	MGI	-	-	3	-	-	-	-	-	-	-	-	-	-	-	-	-	-	-
TpB_UVB_BPS1_VEP_ALL.xlsx	TpB	UVB	BPS1	11:49327738-49327738	T	missense_variant	MODERATE	Olfr1391	ENSMUSG00000101874	Transcript	ENSMUST00000187509.2	protein_coding	01 of 01	-	ENSMUST00000187509.2:c.326C>T	ENSMUSP00000140343.1:p.Ser109Phe	328	326	109	S/F	tCt/tTt	-	-	1	-	MGI	-	-	-	P1	CCDS24606.1	ENSMUSP00000140343	-	Q8VFA4	UPI00000263D5	deleterious(0)	-	-	-	-	-	-	-	-
TpB_UVB_BPS1_VEP_ALL.xlsx	TpB	UVB	BPS1	11:49460507-49460507	C	missense_variant	MODERATE	Olfr1387	ENSMUSG00000063386	Transcript	ENSMUST00000073824.1	protein_coding	01 of 01	-	ENSMUST00000073824.1:c.827T>C	ENSMUSP00000073494.1:p.Phe276Ser	827	827	276	F/S	tTt/tCt	-	-	1	-	MGI	-	-	-	P1	CCDS24610.1	ENSMUSP00000073494	-	Q8VFA9	UPI0000026147	deleterious(0)	-	-	-	-	-	-	-	-
TpB_UVB_BPS1_VEP_ALL.xlsx	TpB	UVB	BPS1	11:49460507-49460507	C	upstream_gene_variant	MODIFIER	Olfr1386	ENSMUSG00000108167	Transcript	ENSMUST00000204518.2	protein_coding	-	-	-	-	-	-	-	-	-	-	4545	1	-	MGI	-	-	3	P1	CCDS24611.1	ENSMUSP00000145320	-	Q7TQT0	UPI00001AA6C1	-	-	-	-	-	-	-	-	-
TpB_UVB_BPS1_VEP_ALL.xlsx	TpB	UVB	BPS1	11:49514524-49514524	G	synonymous_variant	LOW	Olfr1384	ENSMUSG00000044170	Transcript	ENSMUST00000060434.4	protein_coding	01 of 01	-	ENSMUST00000060434.4:c.885A>G	ENSMUSP00000051954.2:p.Val295%3D	907	885	295	V	gtA/gtG	-	-	1	-	MGI	-	-	-	P1	CCDS24613.1	ENSMUSP00000051954	-	Q8VFA8	UPI000002611C	-	-	-	-	-	-	-	-	-
TpB_UVB_BPS1_VEP_ALL.xlsx	TpB	UVB	BPS1	11:49552005-49552005	T	missense_variant	MODERATE	Olfr1381	ENSMUSG00000095187	Transcript	ENSMUST00000167248.2	protein_coding	01 of 01	-	ENSMUST00000167248.2:c.257C>T	ENSMUSP00000126003.2:p.Ser86Phe	257	257	86	S/F	tCt/tTt	-	-	1	-	MGI	-	-	-	P1	CCDS24616.1	ENSMUSP00000126003	-	Q7TQT4	UPI0000194CA6	tolerated(0.7)	-	-	-	-	-	-	-	-
TpB_UVB_BPS1_VEP_ALL.xlsx	TpB	UVB	BPS1	11:49552005-49552005	T	upstream_gene_variant	MODIFIER	Olfr1380	ENSMUSG00000107645	Transcript	ENSMUST00000215360.1	protein_coding	-	-	-	-	-	-	-	-	-	-	4873	1	-	MGI	-	-	5	P1	CCDS24617.1	ENSMUSP00000151039	-	Q7TQT5	UPI00001AA6BD	-	-	-	-	-	-	-	-	-
TpB_UVB_BPS1_VEP_ALL.xlsx	TpB	UVB	BPS1	11:49552578-49552578	T	missense_variant	MODERATE	Olfr1381	ENSMUSG00000095187	Transcript	ENSMUST00000167248.2	protein_coding	01 of 01	-	ENSMUST00000167248.2:c.830A>T	ENSMUSP00000126003.2:p.Tyr277Phe	830	830	277	Y/F	tAt/tTt	-	-	1	-	MGI	-	-	-	P1	CCDS24616.1	ENSMUSP00000126003	-	Q7TQT4	UPI0000194CA6	deleterious(0)	-	-	-	-	-	-	-	-
TpB_UVB_BPS1_VEP_ALL.xlsx	TpB	UVB	BPS1	11:49552578-49552578	T	upstream_gene_variant	MODIFIER	Olfr1380	ENSMUSG00000107645	Transcript	ENSMUST00000215360.1	protein_coding	-	-	-	-	-	-	-	-	-	-	4300	1	-	MGI	-	-	5	P1	CCDS24617.1	ENSMUSP00000151039	-	Q7TQT5	UPI00001AA6BD	-	-	-	-	-	-	-	-	-
TpB_UVB_BPS1_VEP_ALL.xlsx	TpB	UVB	BPS1	11:49872950-49872950	T	intron_variant	MODIFIER	Mapk9	ENSMUSG00000020366	Transcript	ENSMUST00000020634.13	protein_coding	-	06 of 11	ENSMUST00000020634.13:c.616+51C>T	-	-	-	-	-	-	-	-	1	-	MGI	-	-	1	P4	CCDS24623.1	ENSMUSP00000020634	Q9WTU6	Q5NCK8	UPI0000000174	-	-	-	-	-	-	-	-	-
TpB_UVB_BPS1_VEP_ALL.xlsx	TpB	UVB	BPS1	11:50171399-50171399	G	upstream_gene_variant	MODIFIER	Mrnip	ENSMUSG00000020381	Transcript	ENSMUST00000020647.9	protein_coding	-	-	-	-	-	-	-	-	-	-	3450	1	-	MGI	-	-	1	P1	CCDS48784.1	ENSMUSP00000020647	Q9D1F5	-	UPI00000218EA	-	-	-	-	-	-	-	-	-
TpB_UVB_BPS1_VEP_ALL.xlsx	TpB	UVB	BPS1	11:50171399-50171399	G	missense_variant	MODERATE	Tbc1d9b	ENSMUSG00000036644	Transcript	ENSMUST00000093138.12	protein_coding	21 of 21	-	ENSMUST00000093138.12:c.3733T>G	ENSMUSP00000090825.6:p.Leu1245Val	3776	3733	1245	L/V	Ttg/Gtg	-	-	1	-	MGI	-	-	1	P3	CCDS36146.1	ENSMUSP00000090825	Q5SVR0	-	UPI00001E5974	tolerated_low_confidence(0.05)	-	-	-	-	-	-	-	-
TpB_UVB_BPS1_VEP_ALL.xlsx	TpB	UVB	BPS1	11:50786522-50786522	A	intron_variant	MODIFIER	Adamts2	ENSMUSG00000036545	Transcript	ENSMUST00000040523.8	protein_coding	-	14 of 21	ENSMUST00000040523.8:c.2213-64T>A	-	-	-	-	-	-	-	-	1	-	MGI	-	-	1	P2	CCDS24636.1	ENSMUSP00000040171	Q8C9W3	-	UPI000000B9F9	-	-	-	-	-	-	-	-	-
TpB_UVB_BPS1_VEP_ALL.xlsx	TpB	UVB	BPS1	11:53594179-53594179	T	intron_variant	MODIFIER	Kif3a	ENSMUSG00000018395	Transcript	ENSMUST00000057330.14	protein_coding	-	11 of 16	ENSMUST00000057330.14:c.1563+80C>T	-	-	-	-	-	-	-	-	1	-	MGI	-	-	1	A1	CCDS70185.1	ENSMUSP00000056197	-	Q3UI47	UPI000047045C	-	-	-	-	-	-	-	-	-
TpB_UVB_BPS1_VEP_ALL.xlsx	TpB	UVB	BPS1	11:55179377-55179377	T	missense_variant	MODERATE	Slc36a2	ENSMUSG00000020264	Transcript	ENSMUST00000039305.5	protein_coding	04 of 10	-	ENSMUST00000039305.5:c.373G>A	ENSMUSP00000045613.5:p.Gly125Arg	491	373	125	G/R	Gga/Aga	-	-	-1	-	MGI	-	-	1	P1	CCDS24709.1	ENSMUSP00000045613	Q8BHK3	-	UPI000000B687	deleterious(0)	-	-	-	-	-	-	-	-
TpB_UVB_BPS1_VEP_ALL.xlsx	TpB	UVB	BPS1	11:55179377-55179377	T	non_coding_transcript_exon_variant	MODIFIER	Slc36a2	ENSMUSG00000020264	Transcript	ENSMUST00000125560.1	processed_transcript	04 of 07	-	ENSMUST00000125560.1:n.491G>A	-	491	-	-	-	-	-	-	-1	-	MGI	-	-	1	-	-	-	-	-	-	-	-	-	-	-	-	-	-	-
TpB_UVB_BPS1_VEP_ALL.xlsx	TpB	UVB	BPS1	11:57513667-57513667	A	synonymous_variant	LOW	Fam114a2	ENSMUSG00000020523	Transcript	ENSMUST00000020831.12	protein_coding	03 of 14	-	ENSMUST00000020831.12:c.249C>T	ENSMUSP00000020831.6:p.Leu83%3D	308	249	83	L	ctC/ctT	-	-	-1	-	MGI	-	-	1	P3	CCDS24717.1	ENSMUSP00000020831	Q8VE88	-	UPI000002194F	-	-	-	-	-	-	-	-	-
TpB_UVB_BPS1_VEP_ALL.xlsx	TpB	UVB	BPS1	11:57513667-57513667	A	upstream_gene_variant	MODIFIER	Mfap3	ENSMUSG00000020522	Transcript	ENSMUST00000108849.7	protein_coding	-	-	-	-	-	-	-	-	-	-	4997	1	-	MGI	-	-	1	P1	CCDS24718.1	ENSMUSP00000104477	-	A0A0R4J1C7	UPI000002194E	-	-	-	-	-	-	-	-	-
TpB_UVB_BPS1_VEP_ALL.xlsx	TpB	UVB	BPS1	11:58509329-58509329	T	upstream_gene_variant	MODIFIER	Gm12254	ENSMUSG00000085342	Transcript	ENSMUST00000134617.1	processed_pseudogene	-	-	-	-	-	-	-	-	-	-	68	-1	-	MGI	-	-	-	-	-	-	-	-	-	-	-	-	-	-	-	-	-	-
TpB_UVB_BPS1_VEP_ALL.xlsx	TpB	UVB	BPS1	11:58732934-58732934	A	missense_variant	MODERATE	Olfr317	ENSMUSG00000060030	Transcript	ENSMUST00000075607.4	protein_coding	01 of 01	-	ENSMUST00000075607.4:c.230C>T	ENSMUSP00000075034.2:p.Ser77Phe	290	230	77	S/F	tCc/tTc	-	-	-1	-	MGI	-	-	-	P1	CCDS24742.1	ENSMUSP00000075034	-	Q5NCD6	UPI0000434844	deleterious(0.03)	-	-	-	-	-	-	-	-
TpB_UVB_BPS1_VEP_ALL.xlsx	TpB	UVB	BPS1	11:58798584-58798584	T	intron_variant	MODIFIER	Fam183b	ENSMUSG00000049154	Transcript	ENSMUST00000060581.4	protein_coding	-	01 of 02	ENSMUST00000060581.4:c.134-1926G>A	-	-	-	-	-	-	-	-	-1	-	MGI	-	-	1	-	-	ENSMUSP00000051960	Q5NC57	A0A0R4J0N6	UPI00017502AF	-	-	-	-	-	-	-	-	-
TpB_UVB_BPS1_VEP_ALL.xlsx	TpB	UVB	BPS1	11:58831350-58831350	A	synonymous_variant	LOW	Olfr312	ENSMUSG00000096806	Transcript	ENSMUST00000078217.1	protein_coding	01 of 01	-	ENSMUST00000078217.1:c.195T>A	ENSMUSP00000077344.1:p.Ser65%3D	195	195	65	S	tcT/tcA	-	-	1	-	MGI	-	-	-	P1	CCDS24749.1	ENSMUSP00000077344	-	Q7TRZ9	UPI0000021942	-	-	-	-	-	-	-	-	-
[truncated: 13,324 more rows]
