# Supplementary material for: UVB mutagenesis differs in Nras- and Braf-mutant mouse models of melanoma
Source: Life Sci Alliance. 2021 Jul 1;4(9):e202101135. doi: 10.26508/lsa.202101135 (PMC8321651; doi:10.26508/lsa.202101135)
Supplement: Supplementary file 4 [file LSA-2021-01135_TableS4.xlsx]

## Sheet: Sheet1
Group 1	Mutation Type	Group 2	Mutation Type2	diff	lwr.ci	upr.ci	pval	Significant		Table S4: p values associated with Figure 4B
UVB_TpB	C>T	UVA_TpB	C>A	0.338928	0.246591	0.431266	2.2e-16	Yes		Comparison of the frquency of each mutation type in TN and TB tumors arising after mock (No UV), UVA or UVB exposure. Statistical signficiance was evaluated using an ANOVA with Tukey’s HSD post-hoc test.
UVB_TpN	C>T	UVA_TpB	C>A	0.309021	0.219731	0.39831	2.2e-16	Yes
UVB_TpB	C>T other	UVA_TpB	C>A	0.283663	0.191325	0.376	2.2e-16	Yes
UVB_TpB	C>T	UVB_TpB	C>A	0.409317	0.321277	0.497358	2.2e-16	Yes
UVA_TpN	C>T	UVB_TpB	C>A	0.284275	0.199437	0.369112	2.2e-16	Yes
UVB_TpN	C>T	UVB_TpB	C>A	0.37941	0.294572	0.464247	2.2e-16	Yes
UVB_TpB	C>T other	UVB_TpB	C>A	0.354052	0.266011	0.442092	2.2e-16	Yes
UVB_TpN	C>T other	UVB_TpB	C>A	0.324207	0.239369	0.409045	2.2e-16	Yes
UVB_TpB	C>T	NoUV_TpN	C>A	0.356386	0.264048	0.448723	2.2e-16	Yes
UVB_TpN	C>T	NoUV_TpN	C>A	0.326478	0.237189	0.415767	2.2e-16	Yes
UVB_TpB	C>T other	NoUV_TpN	C>A	0.30112	0.208783	0.393458	2.2e-16	Yes
UVB_TpN	C>T other	NoUV_TpN	C>A	0.271275	0.181986	0.360565	2.2e-16	Yes
UVB_TpB	C>T	UVA_TpN	C>A	0.362973	0.278135	0.447811	2.2e-16	Yes
UVB_TpN	C>T	UVA_TpN	C>A	0.333065	0.251556	0.414575	2.2e-16	Yes
UVB_TpB	C>T other	UVA_TpN	C>A	0.307708	0.22287	0.392545	2.2e-16	Yes
UVB_TpN	C>T other	UVA_TpN	C>A	0.277863	0.196353	0.359372	2.2e-16	Yes
UVB_TpB	C>T	UVB_TpN	C>A	0.401324	0.316486	0.486162	2.2e-16	Yes
UVA_TpN	C>T	UVB_TpN	C>A	0.276281	0.194772	0.357791	2.2e-16	Yes
UVB_TpN	C>T	UVB_TpN	C>A	0.371416	0.289907	0.452926	2.2e-16	Yes
UVB_TpB	C>T other	UVB_TpN	C>A	0.346058	0.261221	0.430896	2.2e-16	Yes
UVB_TpN	C>T other	UVB_TpN	C>A	0.316214	0.234704	0.397723	2.2e-16	Yes
UVB_TpB	C>T	NoUV_TpB	C>G	0.418932	0.330892	0.506973	2.2e-16	Yes
UVA_TpN	C>T	NoUV_TpB	C>G	0.29389	0.209052	0.378728	2.2e-16	Yes
UVB_TpN	C>T	NoUV_TpB	C>G	0.389025	0.304187	0.473863	2.2e-16	Yes
UVB_TpB	C>T other	NoUV_TpB	C>G	0.363667	0.275627	0.451707	2.2e-16	Yes
UVB_TpN	C>T other	NoUV_TpB	C>G	0.333822	0.248984	0.41866	2.2e-16	Yes
UVB_TpB	C>T	UVA_TpB	C>G	0.391479	0.299142	0.483817	2.2e-16	Yes
UVB_TpN	C>T	UVA_TpB	C>G	0.361572	0.272282	0.450861	2.2e-16	Yes
UVB_TpB	C>T other	UVA_TpB	C>G	0.336214	0.243876	0.428551	2.2e-16	Yes
UVB_TpN	C>T other	UVA_TpB	C>G	0.306369	0.21708	0.395658	2.2e-16	Yes
UVB_TpB	C>T	UVB_TpB	C>G	0.422483	0.334442	0.510523	2.2e-16	Yes
UVA_TpN	C>T	UVB_TpB	C>G	0.29744	0.212602	0.382278	2.2e-16	Yes
UVB_TpN	C>T	UVB_TpB	C>G	0.392575	0.307737	0.477413	2.2e-16	Yes
UVB_TpB	C>T other	UVB_TpB	C>G	0.367217	0.279177	0.455258	2.2e-16	Yes
UVB_TpN	C>T other	UVB_TpB	C>G	0.337373	0.252535	0.42221	2.2e-16	Yes
UVB_TpB	C>T	NoUV_TpN	C>G	0.382394	0.290056	0.474731	2.2e-16	Yes
UVB_TpN	C>T	NoUV_TpN	C>G	0.352486	0.263197	0.441775	2.2e-16	Yes
UVB_TpB	C>T other	NoUV_TpN	C>G	0.327128	0.234791	0.419466	2.2e-16	Yes
UVB_TpN	C>T other	NoUV_TpN	C>G	0.297283	0.207994	0.386573	2.2e-16	Yes
UVB_TpB	C>T	UVA_TpN	C>G	0.389447	0.30461	0.474285	2.2e-16	Yes
UVA_TpN	C>T	UVA_TpN	C>G	0.264405	0.182895	0.345914	2.2e-16	Yes
UVB_TpN	C>T	UVA_TpN	C>G	0.35954	0.27803	0.441049	2.2e-16	Yes
UVB_TpB	C>T other	UVA_TpN	C>G	0.334182	0.249344	0.41902	2.2e-16	Yes
UVB_TpN	C>T other	UVA_TpN	C>G	0.304337	0.222828	0.385847	2.2e-16	Yes
UVB_TpB	C>T	UVB_TpN	C>G	0.411395	0.326558	0.496233	2.2e-16	Yes
UVA_TpN	C>T	UVB_TpN	C>G	0.286353	0.204843	0.367862	2.2e-16	Yes
UVB_TpN	C>T	UVB_TpN	C>G	0.381488	0.299978	0.462997	2.2e-16	Yes
UVB_TpB	C>T other	UVB_TpN	C>G	0.35613	0.271292	0.440968	2.2e-16	Yes
UVB_TpN	C>T other	UVB_TpN	C>G	0.326285	0.244776	0.407795	2.2e-16	Yes
NoUV_TpB	C>T at CpG	UVB_TpB	C>T	-0.341446	-0.429486	-0.253405	2.2e-16	Yes
UVA_TpB	C>T at CpG	UVB_TpB	C>T	-0.351876	-0.444214	-0.259539	2.2e-16	Yes
UVB_TpB	C>T at CpG	UVB_TpB	C>T	-0.377635	-0.465675	-0.289595	2.2e-16	Yes
NoUV_TpN	C>T at CpG	UVB_TpB	C>T	-0.362434	-0.454771	-0.270096	2.2e-16	Yes
UVA_TpN	C>T at CpG	UVB_TpB	C>T	-0.345337	-0.430175	-0.260499	2.2e-16	Yes
UVB_TpN	C>T at CpG	UVB_TpB	C>T	-0.377698	-0.462536	-0.29286	2.2e-16	Yes
NoUV_TpB	T>A	UVB_TpB	C>T	-0.362801	-0.450841	-0.27476	2.2e-16	Yes
UVA_TpB	T>A	UVB_TpB	C>T	-0.37056	-0.462897	-0.278222	2.2e-16	Yes
UVB_TpB	T>A	UVB_TpB	C>T	-0.39289	-0.480931	-0.30485	2.2e-16	Yes
NoUV_TpN	T>A	UVB_TpB	C>T	-0.385798	-0.478135	-0.29346	2.2e-16	Yes
UVA_TpN	T>A	UVB_TpB	C>T	-0.36273	-0.447568	-0.277892	2.2e-16	Yes
UVB_TpN	T>A	UVB_TpB	C>T	-0.385196	-0.470033	-0.300358	2.2e-16	Yes
NoUV_TpB	T>C	UVB_TpB	C>T	-0.272954	-0.360995	-0.184914	2.2e-16	Yes
UVA_TpB	T>C	UVB_TpB	C>T	-0.294707	-0.387045	-0.20237	2.2e-16	Yes
UVB_TpB	T>C	UVB_TpB	C>T	-0.390632	-0.478672	-0.302592	2.2e-16	Yes
UVA_TpN	T>C	UVB_TpB	C>T	-0.304173	-0.389011	-0.219335	2.2e-16	Yes
UVB_TpN	T>C	UVB_TpB	C>T	-0.365088	-0.449926	-0.28025	2.2e-16	Yes
NoUV_TpB	T>G	UVB_TpB	C>T	-0.393348	-0.481389	-0.305308	2.2e-16	Yes
UVA_TpB	T>G	UVB_TpB	C>T	-0.343636	-0.435974	-0.251299	2.2e-16	Yes
UVB_TpB	T>G	UVB_TpB	C>T	-0.414981	-0.503022	-0.326941	2.2e-16	Yes
NoUV_TpN	T>G	UVB_TpB	C>T	-0.346713	-0.439051	-0.254376	2.2e-16	Yes
UVA_TpN	T>G	UVB_TpB	C>T	-0.360895	-0.445733	-0.276057	2.2e-16	Yes
UVB_TpN	T>G	UVB_TpB	C>T	-0.407486	-0.492323	-0.322648	2.2e-16	Yes
UVB_TpN	C>T at CpG	UVA_TpN	C>T	-0.252655	-0.334165	-0.171146	2.2e-16	Yes
UVB_TpB	T>A	UVA_TpN	C>T	-0.267848	-0.352685	-0.18301	2.2e-16	Yes
UVB_TpN	T>A	UVA_TpN	C>T	-0.260153	-0.341663	-0.178644	2.2e-16	Yes
UVB_TpB	T>C	UVA_TpN	C>T	-0.265589	-0.350427	-0.180752	2.2e-16	Yes
NoUV_TpB	T>G	UVA_TpN	C>T	-0.268306	-0.353144	-0.183468	2.2e-16	Yes
UVB_TpB	T>G	UVA_TpN	C>T	-0.289939	-0.374777	-0.205101	2.2e-16	Yes
UVB_TpN	T>G	UVA_TpN	C>T	-0.282443	-0.363953	-0.200934	2.2e-16	Yes
NoUV_TpB	C>T at CpG	UVB_TpN	C>T	-0.311538	-0.396376	-0.2267	2.2e-16	Yes
UVA_TpB	C>T at CpG	UVB_TpN	C>T	-0.321969	-0.411258	-0.23268	2.2e-16	Yes
UVB_TpB	C>T at CpG	UVB_TpN	C>T	-0.347727	-0.432565	-0.26289	2.2e-16	Yes
NoUV_TpN	C>T at CpG	UVB_TpN	C>T	-0.332526	-0.421816	-0.243237	2.2e-16	Yes
UVA_TpN	C>T at CpG	UVB_TpN	C>T	-0.31543	-0.396939	-0.23392	2.2e-16	Yes
UVB_TpN	C>T at CpG	UVB_TpN	C>T	-0.34779	-0.4293	-0.266281	2.2e-16	Yes
NoUV_TpB	T>A	UVB_TpN	C>T	-0.332893	-0.417731	-0.248055	2.2e-16	Yes
UVA_TpB	T>A	UVB_TpN	C>T	-0.340652	-0.429941	-0.251363	2.2e-16	Yes
UVB_TpB	T>A	UVB_TpN	C>T	-0.362983	-0.44782	-0.278145	2.2e-16	Yes
NoUV_TpN	T>A	UVB_TpN	C>T	-0.35589	-0.44518	-0.266601	2.2e-16	Yes
UVA_TpN	T>A	UVB_TpN	C>T	-0.332822	-0.414332	-0.251313	2.2e-16	Yes
UVB_TpN	T>A	UVB_TpN	C>T	-0.355288	-0.436798	-0.273778	2.2e-16	Yes
UVB_TpB	T>C	UVB_TpN	C>T	-0.360724	-0.445562	-0.275887	2.2e-16	Yes
UVA_TpN	T>C	UVB_TpN	C>T	-0.274265	-0.355775	-0.192756	2.2e-16	Yes
UVB_TpN	T>C	UVB_TpN	C>T	-0.33518	-0.41669	-0.253671	2.2e-16	Yes
NoUV_TpB	T>G	UVB_TpN	C>T	-0.363441	-0.448279	-0.278603	2.2e-16	Yes
UVA_TpB	T>G	UVB_TpN	C>T	-0.313729	-0.403018	-0.224439	2.2e-16	Yes
UVB_TpB	T>G	UVB_TpN	C>T	-0.385074	-0.469912	-0.300236	2.2e-16	Yes
NoUV_TpN	T>G	UVB_TpN	C>T	-0.316806	-0.406095	-0.227516	2.2e-16	Yes
UVA_TpN	T>G	UVB_TpN	C>T	-0.330987	-0.412497	-0.249478	2.2e-16	Yes
UVB_TpN	T>G	UVB_TpN	C>T	-0.377578	-0.459087	-0.296068	2.2e-16	Yes
UVB_TpB	C>T other	NoUV_TpB	C>T at CpG	0.28618	0.19814	0.374221	2.2e-16	Yes
UVB_TpN	C>T other	NoUV_TpB	C>T at CpG	0.256336	0.171498	0.341173	2.2e-16	Yes
UVB_TpB	C>T other	UVA_TpB	C>T at CpG	0.296611	0.204273	0.388948	2.2e-16	Yes
UVB_TpB	C>T other	UVB_TpB	C>T at CpG	0.32237	0.234329	0.41041	2.2e-16	Yes
UVB_TpN	C>T other	UVB_TpB	C>T at CpG	0.292525	0.207687	0.377363	2.2e-16	Yes
UVB_TpB	C>T other	NoUV_TpN	C>T at CpG	0.307169	0.214831	0.399506	2.2e-16	Yes
UVB_TpN	C>T other	NoUV_TpN	C>T at CpG	0.277324	0.188035	0.366613	2.2e-16	Yes
UVB_TpB	C>T other	UVA_TpN	C>T at CpG	0.290072	0.205234	0.374909	2.2e-16	Yes
UVB_TpN	C>T other	UVA_TpN	C>T at CpG	0.260227	0.178718	0.341737	2.2e-16	Yes
UVB_TpB	C>T other	UVB_TpN	C>T at CpG	0.322433	0.237595	0.40727	2.2e-16	Yes
UVB_TpN	C>T other	UVB_TpN	C>T at CpG	0.292588	0.211078	0.374097	2.2e-16	Yes
NoUV_TpB	T>A	UVB_TpB	C>T other	-0.307535	-0.395576	-0.219495	2.2e-16	Yes
UVA_TpB	T>A	UVB_TpB	C>T other	-0.315294	-0.407632	-0.222957	2.2e-16	Yes
UVB_TpB	T>A	UVB_TpB	C>T other	-0.337625	-0.425665	-0.249584	2.2e-16	Yes
NoUV_TpN	T>A	UVB_TpB	C>T other	-0.330533	-0.42287	-0.238195	2.2e-16	Yes
UVA_TpN	T>A	UVB_TpB	C>T other	-0.307464	-0.392302	-0.222627	2.2e-16	Yes
UVB_TpN	T>A	UVB_TpB	C>T other	-0.32993	-0.414768	-0.245092	2.2e-16	Yes
UVB_TpB	T>C	UVB_TpB	C>T other	-0.335367	-0.423407	-0.247326	2.2e-16	Yes
UVB_TpN	T>C	UVB_TpB	C>T other	-0.309823	-0.39466	-0.224985	2.2e-16	Yes
NoUV_TpB	T>G	UVB_TpB	C>T other	-0.338083	-0.426123	-0.250043	2.2e-16	Yes
UVA_TpB	T>G	UVB_TpB	C>T other	-0.288371	-0.380708	-0.196033	2.2e-16	Yes
UVB_TpB	T>G	UVB_TpB	C>T other	-0.359716	-0.447756	-0.271676	2.2e-16	Yes
NoUV_TpN	T>G	UVB_TpB	C>T other	-0.291448	-0.383785	-0.19911	2.2e-16	Yes
UVA_TpN	T>G	UVB_TpB	C>T other	-0.30563	-0.390467	-0.220792	2.2e-16	Yes
UVB_TpN	T>G	UVB_TpB	C>T other	-0.35222	-0.437058	-0.267382	2.2e-16	Yes
NoUV_TpB	T>A	UVB_TpN	C>T other	-0.277691	-0.362528	-0.192853	2.2e-16	Yes
UVA_TpB	T>A	UVB_TpN	C>T other	-0.285449	-0.374739	-0.19616	2.2e-16	Yes
UVB_TpB	T>A	UVB_TpN	C>T other	-0.30778	-0.392618	-0.222942	2.2e-16	Yes
NoUV_TpN	T>A	UVB_TpN	C>T other	-0.300688	-0.389977	-0.211399	2.2e-16	Yes
UVA_TpN	T>A	UVB_TpN	C>T other	-0.27762	-0.359129	-0.19611	2.2e-16	Yes
UVB_TpN	T>A	UVB_TpN	C>T other	-0.300085	-0.381595	-0.218576	2.2e-16	Yes
UVB_TpB	T>C	UVB_TpN	C>T other	-0.305522	-0.39036	-0.220684	2.2e-16	Yes
UVB_TpN	T>C	UVB_TpN	C>T other	-0.279978	-0.361487	-0.198468	2.2e-16	Yes
NoUV_TpB	T>G	UVB_TpN	C>T other	-0.308238	-0.393076	-0.2234	2.2e-16	Yes
UVB_TpB	T>G	UVB_TpN	C>T other	-0.329871	-0.414709	-0.245033	2.2e-16	Yes
UVA_TpN	T>G	UVB_TpN	C>T other	-0.275785	-0.357294	-0.194275	2.2e-16	Yes
UVB_TpN	T>G	UVB_TpN	C>T other	-0.322375	-0.403885	-0.240866	2.2e-16	Yes
NoUV_TpB	C>T other	UVB_TpB	C>T	-0.265625	-0.353665	-0.177584	2.55e-15	Yes
UVA_TpB	C>T	UVB_TpB	C>G	0.276986	0.184649	0.369324	7.55e-15	Yes
UVA_TpN	C>T	UVA_TpB	C>G	0.266437	0.177147	0.355726	8.77e-15	Yes
UVB_TpN	C>T other	UVA_TpB	C>T at CpG	0.266766	0.177477	0.356055	8.99e-15	Yes
UVA_TpB	C>T	UVB_TpN	C>G	0.265899	0.176609	0.355188	1.12e-14	Yes
UVB_TpB	C>T at CpG	UVA_TpN	C>T	-0.252593	-0.33743	-0.167755	1.12e-14	Yes
UVA_TpB	C>T	NoUV_TpB	C>G	0.273436	0.181098	0.365773	1.42e-14	Yes
NoUV_TpN	C>T	UVB_TpB	C>G	0.273505	0.181168	0.365843	1.42e-14	Yes
UVA_TpB	T>C	UVB_TpN	C>T	-0.2648	-0.354089	-0.17551	1.48e-14	Yes
UVB_TpN	T>C	UVA_TpN	C>T	-0.240045	-0.321555	-0.158536	2.83e-14	Yes
NoUV_TpN	C>T	UVB_TpN	C>G	0.262418	0.173129	0.351707	3.31e-14	Yes
UVA_TpN	T>C	UVB_TpB	C>T other	-0.248908	-0.333745	-0.16407	3.41e-14	Yes
UVB_TpN	T>G	UVA_TpB	C>T	-0.261989	-0.351278	-0.1727	3.43e-14	Yes
NoUV_TpN	T>G	UVB_TpN	C>T other	-0.261603	-0.350892	-0.172314	3.75e-14	Yes
NoUV_TpN	C>T	NoUV_TpB	C>G	0.269955	0.177617	0.362292	4.15e-14	Yes
UVA_TpN	C>T	UVA_TpN	C>A	0.237931	0.156421	0.31944	4.19e-14	Yes
UVB_TpB	T>G	UVA_TpB	C>T	-0.269485	-0.361822	-0.177147	4.23e-14	Yes
NoUV_TpN	T>A	UVA_TpN	C>T	-0.260755	-0.350045	-0.171466	4.35e-14	Yes
UVA_TpN	T>A	UVA_TpN	C>T	-0.237687	-0.319197	-0.156178	4.47e-14	Yes
UVB_TpN	T>G	NoUV_TpN	C>T	-0.258508	-0.347797	-0.169219	5.81e-14	Yes
UVA_TpB	T>G	UVB_TpN	C>T other	-0.258526	-0.347815	-0.169237	5.83e-14	Yes
UVA_TpN	T>G	UVA_TpN	C>T	-0.235852	-0.317362	-0.154343	5.9e-14	Yes
UVA_TpN	C>T	NoUV_TpN	C>G	0.257351	0.168062	0.34664	6.77e-14	Yes
UVB_TpB	T>G	NoUV_TpN	C>T	-0.266004	-0.358341	-0.173666	7.02e-14	Yes
UVA_TpB	C>T	UVB_TpN	C>A	0.255827	0.166538	0.345116	8.76e-14	Yes
NoUV_TpB	T>C	UVB_TpN	C>T	-0.243047	-0.327885	-0.158209	8.78e-14	Yes
UVA_TpB	C>T	UVB_TpB	C>A	0.263821	0.171483	0.356158	9.94e-14	Yes
UVB_TpN	C>T other	UVA_TpB	C>A	0.253818	0.164529	0.343107	1.1e-13	Yes
NoUV_TpN	T>C	UVB_TpB	C>T	-0.261058	-0.353396	-0.168721	1.26e-13	Yes
NoUV_TpN	C>T	UVB_TpN	C>A	0.252346	0.163057	0.341636	1.28e-13	Yes
NoUV_TpB	C>T	UVB_TpB	C>G	0.248313	0.160273	0.336353	1.34e-13	Yes
NoUV_TpN	C>T	UVB_TpB	C>A	0.26034	0.168002	0.352677	1.36e-13	Yes
NoUV_TpB	T>A	UVA_TpN	C>T	-0.237758	-0.322596	-0.15292	1.59e-13	Yes
NoUV_TpB	C>T	UVB_TpN	C>G	0.237226	0.152388	0.322063	1.64e-13	Yes
NoUV_TpB	C>T other	UVB_TpN	C>T	-0.235717	-0.320555	-0.150879	1.83e-13	Yes
NoUV_TpB	C>T	NoUV_TpB	C>G	0.244762	0.156722	0.332803	1.87e-13	Yes
UVB_TpN	T>G	NoUV_TpB	C>T	-0.233316	-0.318154	-0.148478	2.34e-13	Yes
UVA_TpB	T>A	UVA_TpN	C>T	-0.245517	-0.334806	-0.156228	2.36e-13	Yes
UVA_TpB	C>T	UVA_TpN	C>G	0.243951	0.154662	0.33324	2.47e-13	Yes
UVB_TpB	T>G	NoUV_TpB	C>T	-0.240811	-0.328852	-0.152771	2.47e-13	Yes
UVA_TpN	C>T at CpG	UVA_TpN	C>T	-0.220295	-0.301804	-0.138785	2.9e-13	Yes
NoUV_TpN	C>T	UVA_TpN	C>G	0.24047	0.151181	0.329759	3.14e-13	Yes
UVA_TpN	T>C	UVB_TpN	C>T other	-0.219063	-0.300572	-0.137553	3.16e-13	Yes
NoUV_TpB	C>T	UVB_TpN	C>A	0.227154	0.142316	0.311992	3.2e-13	Yes
NoUV_TpB	T>G	UVA_TpB	C>T	-0.247852	-0.340189	-0.155514	3.26e-13	Yes
UVB_TpB	T>A	UVA_TpB	C>T	-0.247394	-0.339731	-0.155056	3.29e-13	Yes
UVB_TpN	T>A	UVA_TpB	C>T	-0.239699	-0.328988	-0.15041	3.29e-13	Yes
NoUV_TpB	C>T	UVB_TpB	C>A	0.235147	0.147107	0.323188	3.35e-13	Yes
NoUV_TpN	C>T at CpG	UVA_TpN	C>T	-0.237391	-0.326681	-0.148102	3.46e-13	Yes
UVB_TpB	C>T	NoUV_TpB	C>A	0.233928	0.145888	0.321968	3.47e-13	Yes
UVB_TpB	T>C	UVA_TpB	C>T	-0.245135	-0.337473	-0.152798	3.47e-13	Yes
NoUV_TpB	T>G	NoUV_TpN	C>T	-0.244371	-0.336708	-0.152033	3.57e-13	Yes
UVB_TpN	T>A	NoUV_TpN	C>T	-0.236218	-0.325507	-0.146929	3.6e-13	Yes
UVB_TpB	T>C	NoUV_TpN	C>T	-0.241654	-0.333992	-0.149317	3.67e-13	Yes
UVB_TpB	T>A	NoUV_TpN	C>T	-0.243913	-0.33625	-0.151575	3.69e-13	Yes
UVB_TpN	C>T at CpG	UVA_TpB	C>T	-0.232201	-0.32149	-0.142912	3.98e-13	Yes
UVB_TpN	C>T at CpG	NoUV_TpN	C>T	-0.22872	-0.31801	-0.139431	4.03e-13	Yes
UVA_TpN	C>T	NoUV_TpN	C>A	0.231343	0.142054	0.320632	4.06e-13	Yes
NoUV_TpN	T>C	UVB_TpN	C>T	-0.231151	-0.32044	-0.141861	4.08e-13	Yes
NoUV_TpB	T>C	UVB_TpB	C>T other	-0.217689	-0.305729	-0.129649	4.14e-13	Yes
UVA_TpB	T>C	UVB_TpB	C>T other	-0.239442	-0.331779	-0.147104	4.15e-13	Yes
UVA_TpN	C>T other	UVB_TpB	C>T	-0.212606	-0.297444	-0.127768	4.16e-13	Yes
UVA_TpN	T>G	UVA_TpB	C>T	-0.215398	-0.304688	-0.126109	4.19e-13	Yes
NoUV_TpB	C>T at CpG	UVA_TpN	C>T	-0.216403	-0.301241	-0.131565	4.21e-13	Yes
UVA_TpB	C>T	UVA_TpB	C>G	0.245983	0.149539	0.342426	4.22e-13	Yes
NoUV_TpB	T>A	NoUV_TpN	C>T	-0.213823	-0.306161	-0.121486	4.26e-13	Yes
UVA_TpN	C>T other	UVB_TpB	C>G	0.209877	0.125039	0.294715	4.27e-13	Yes
UVA_TpN	C>T other	UVB_TpN	C>A	0.188718	0.107208	0.270228	4.28e-13	Yes
NoUV_TpB	C>T	UVA_TpB	C>G	0.217309	0.124972	0.309647	4.28e-13	Yes
UVA_TpB	C>T at CpG	UVA_TpN	C>T	-0.226834	-0.316123	-0.137545	4.28e-13	Yes
NoUV_TpB	T>A	UVA_TpB	C>T	-0.217304	-0.309642	-0.124967	4.29e-13	Yes
UVB_TpB	T>C	NoUV_TpB	C>T	-0.216462	-0.304503	-0.128422	4.33e-13	Yes
UVB_TpN	T>C	UVA_TpB	C>T	-0.219591	-0.30888	-0.130302	4.33e-13	Yes
NoUV_TpN	C>T	UVA_TpB	C>G	0.242502	0.146058	0.338945	4.34e-13	Yes
UVB_TpB	C>T at CpG	UVA_TpB	C>T	-0.232138	-0.324476	-0.139801	4.34e-13	Yes
UVB_TpB	C>T at CpG	NoUV_TpN	C>T	-0.228658	-0.320995	-0.13632	4.35e-13	Yes
UVB_TpB	C>T at CpG	NoUV_TpB	C>T	-0.203465	-0.291506	-0.115425	4.36e-13	Yes
NoUV_TpN	C>T other	UVB_TpB	C>T	-0.219444	-0.311781	-0.127107	4.36e-13	Yes
UVB_TpN	C>T	NoUV_TpB	C>A	0.204021	0.119183	0.288858	4.37e-13	Yes
UVA_TpN	T>A	UVA_TpB	C>T	-0.217233	-0.306522	-0.127944	4.37e-13	Yes
UVA_TpN	C>T other	UVB_TpN	C>G	0.198789	0.11728	0.280299	4.38e-13	Yes
NoUV_TpN	C>T	UVA_TpN	C>A	0.213996	0.124706	0.303285	4.39e-13	Yes
UVA_TpN	C>T other	NoUV_TpB	C>G	0.206326	0.121489	0.291164	4.39e-13	Yes
UVA_TpB	C>T	NoUV_TpN	C>G	0.236897	0.140454	0.33334	4.4e-13	Yes
NoUV_TpB	C>T	UVA_TpN	C>G	0.215278	0.13044	0.300115	4.4e-13	Yes
UVB_TpN	C>T at CpG	NoUV_TpB	C>T	-0.203528	-0.288366	-0.11869	4.4e-13	Yes
UVA_TpN	C>T	UVA_TpB	C>A	0.213886	0.124596	0.303175	4.42e-13	Yes
UVB_TpN	T>A	NoUV_TpB	C>T	-0.211026	-0.295864	-0.126188	4.42e-13	Yes
UVA_TpB	T>G	UVA_TpN	C>T	-0.218594	-0.307883	-0.129304	4.42e-13	Yes
UVA_TpB	T>C	UVB_TpN	C>T other	-0.209597	-0.298886	-0.120308	4.42e-13	Yes
NoUV_TpB	T>G	NoUV_TpB	C>T	-0.219179	-0.307219	-0.131138	4.43e-13	Yes
NoUV_TpN	T>A	NoUV_TpN	C>T	-0.23682	-0.333264	-0.140377	4.43e-13	Yes
UVB_TpN	T>G	UVA_TpN	C>T other	-0.19488	-0.276389	-0.11337	4.43e-13	Yes
UVA_TpB	C>T	UVA_TpN	C>A	0.217476	0.128187	0.306766	4.44e-13	Yes
UVB_TpB	C>T other	NoUV_TpB	C>T other	0.210359	0.122319	0.298399	4.44e-13	Yes
UVA_TpN	T>A	NoUV_TpN	C>T	-0.213752	-0.303042	-0.124463	4.45e-13	Yes
UVA_TpN	T>G	NoUV_TpN	C>T	-0.211918	-0.301207	-0.122628	4.45e-13	Yes
NoUV_TpN	T>A	UVA_TpB	C>T	-0.240301	-0.336745	-0.143858	4.47e-13	Yes
NoUV_TpN	T>A	NoUV_TpB	C>T	-0.211628	-0.303966	-0.119291	4.49e-13	Yes
UVB_TpB	T>A	NoUV_TpB	C>T	-0.21872	-0.306761	-0.13068	4.5e-13	Yes
UVA_TpB	C>T other	UVB_TpB	C>T	-0.226521	-0.318858	-0.134183	4.51e-13	Yes
UVA_TpB	T>A	UVA_TpB	C>T	-0.225063	-0.321506	-0.128619	4.56e-13	Yes
NoUV_TpN	T>G	UVA_TpN	C>T	-0.221671	-0.31096	-0.132382	4.56e-13	Yes
UVB_TpB	T>G	UVA_TpN	C>T other	-0.202375	-0.287213	-0.117538	4.56e-13	Yes
UVA_TpN	C>T other	UVB_TpB	C>A	0.196711	0.111874	0.281549	4.6e-13	Yes
UVB_TpN	T>C	NoUV_TpN	C>T	-0.216111	-0.3054	-0.126821	4.61e-13	Yes
NoUV_TpN	C>T	NoUV_TpN	C>G	0.233416	0.136973	0.329859	4.63e-13	Yes
UVA_TpB	T>A	NoUV_TpN	C>T	-0.221582	-0.318025	-0.125139	4.66e-13	Yes
NoUV_TpB	C>T	NoUV_TpN	C>G	0.208224	0.115886	0.300561	4.83e-13	Yes
UVB_TpN	T>C	NoUV_TpB	C>T	-0.190918	-0.275756	-0.10608	4.84e-13	Yes
NoUV_TpN	C>T at CpG	UVA_TpB	C>T	-0.216937	-0.313381	-0.120494	4.86e-13	Yes
UVA_TpN	C>T other	UVB_TpN	C>T	-0.182698	-0.264208	-0.101189	4.89e-13	Yes
UVA_TpN	C>T at CpG	UVA_TpB	C>T	-0.19984	-0.28913	-0.110551	5.01e-13	Yes
NoUV_TpN	T>C	UVB_TpB	C>T other	-0.205793	-0.29813	-0.113455	5.15e-13	Yes
NoUV_TpB	C>T	UVA_TpN	C>A	0.188803	0.103965	0.273641	5.3e-13	Yes
UVA_TpN	T>A	NoUV_TpB	C>T	-0.18856	-0.273398	-0.103722	5.42e-13	Yes
NoUV_TpB	T>C	UVB_TpN	C>T other	-0.187844	-0.272682	-0.103006	5.85e-13	Yes
NoUV_TpN	C>T at CpG	NoUV_TpN	C>T	-0.213456	-0.3099	-0.117013	5.89e-13	Yes
UVA_TpB	C>T other	UVB_TpN	C>T	-0.196613	-0.285902	-0.107324	6.13e-13	Yes
UVA_TpN	T>G	NoUV_TpB	C>T	-0.186725	-0.271563	-0.101887	6.21e-13	Yes
UVA_TpN	C>T at CpG	NoUV_TpN	C>T	-0.19636	-0.285649	-0.10707	6.34e-13	Yes
NoUV_TpN	C>T other	UVB_TpB	C>G	0.203039	0.110701	0.295376	6.35e-13	Yes
UVA_TpN	T>C	UVA_TpN	C>T	-0.179131	-0.26064	-0.097621	6.43e-13	Yes
UVA_TpB	C>T	NoUV_TpN	C>A	0.210889	0.114446	0.307332	7.35e-13	Yes
UVA_TpN	C>T other	UVA_TpN	C>G	0.176842	0.0953321	0.258351	8.98e-13	Yes
NoUV_TpN	C>T other	NoUV_TpB	C>G	0.199488	0.107151	0.291826	1.04e-12	Yes
NoUV_TpN	C>T	NoUV_TpN	C>A	0.207408	0.110965	0.303851	1.23e-12	Yes
NoUV_TpN	C>T other	UVB_TpN	C>G	0.191951	0.102662	0.281241	1.25e-12	Yes
NoUV_TpB	T>A	NoUV_TpB	C>T	-0.188631	-0.276671	-0.100591	1.39e-12	Yes
UVB_TpB	C>G	NoUV_TpB	C>A	-0.188555	-0.276595	-0.100514	1.42e-12	Yes
UVA_TpB	C>T at CpG	UVA_TpB	C>T	-0.20638	-0.302823	-0.109936	1.47e-12	Yes
NoUV_TpB	T>G	UVA_TpN	C>T other	-0.180742	-0.26558	-0.0959047	1.78e-12	Yes
UVB_TpN	C>T other	NoUV_TpB	C>T other	0.180514	0.0956767	0.265352	1.88e-12	Yes
UVA_TpB	T>A	NoUV_TpB	C>T	-0.19639	-0.288727	-0.104052	1.92e-12	Yes
UVB_TpB	T>A	UVA_TpN	C>T other	-0.180284	-0.265122	-0.0954466	1.99e-12	Yes
NoUV_TpN	C>T other	UVB_TpN	C>T	-0.189536	-0.278826	-0.100247	2.09e-12	Yes
UVA_TpB	C>T other	UVB_TpB	C>G	0.195962	0.103624	0.288299	2.11e-12	Yes
NoUV_TpB	C>T at CpG	UVA_TpB	C>T	-0.195949	-0.288286	-0.103612	2.12e-12	Yes
UVB_TpB	T>G	NoUV_TpN	C>T other	-0.195537	-0.287875	-0.1032	2.34e-12	Yes
UVB_TpN	T>A	UVA_TpN	C>T other	-0.17259	-0.254099	-0.0910802	2.35e-12	Yes
UVB_TpN	T>G	NoUV_TpN	C>T other	-0.188042	-0.277331	-0.0987524	3.02e-12	Yes
UVA_TpB	C>T at CpG	NoUV_TpN	C>T	-0.202899	-0.299342	-0.106456	3.18e-12	Yes
NoUV_TpB	C>G	NoUV_TpB	C>A	-0.185004	-0.273045	-0.0969638	3.36e-12	Yes
UVB_TpB	T>C	UVA_TpN	C>T other	-0.178026	-0.262864	-0.0931883	3.6e-12	Yes
UVB_TpN	C>G	NoUV_TpB	C>A	-0.177467	-0.262305	-0.0926294	4.21e-12	Yes
NoUV_TpN	T>G	UVA_TpB	C>T	-0.201217	-0.29766	-0.104773	4.78e-12	Yes
NoUV_TpB	C>T at CpG	NoUV_TpN	C>T	-0.192468	-0.284806	-0.100131	5.01e-12	Yes
UVA_TpB	C>T other	NoUV_TpB	C>G	0.192411	0.100074	0.284749	5.09e-12	Yes
UVA_TpB	C>T other	UVB_TpN	C>G	0.184874	0.0955853	0.274164	7.05e-12	Yes
UVB_TpB	T>G	NoUV_TpB	C>A	-0.181053	-0.269093	-0.0930128	1e-11	Yes
NoUV_TpN	C>T other	UVB_TpB	C>A	0.189873	0.0975358	0.282211	1e-11	Yes
UVA_TpB	T>G	UVA_TpB	C>T	-0.198139	-0.294583	-0.101696	1.05e-11	Yes
NoUV_TpN	T>G	NoUV_TpN	C>T	-0.197736	-0.294179	-0.101292	1.17e-11	Yes
UVB_TpN	T>G	NoUV_TpB	C>A	-0.173557	-0.258395	-0.0887196	1.31e-11	Yes
UVB_TpB	T>G	UVA_TpB	C>T other	-0.18846	-0.280798	-0.096123	1.48e-11	Yes
NoUV_TpN	C>T at CpG	NoUV_TpB	C>T	-0.188264	-0.280602	-0.0959267	1.56e-11	Yes
NoUV_TpN	C>T other	UVB_TpN	C>A	0.18188	0.0925907	0.271169	1.63e-11	Yes
UVB_TpB	C>T other	NoUV_TpB	C>A	0.178663	0.0906223	0.266703	1.99e-11	Yes
UVB_TpN	T>G	UVA_TpB	C>T other	-0.180965	-0.270254	-0.0916755	2.12e-11	Yes
UVA_TpN	C>T other	UVB_TpN	C>T at CpG	0.165092	0.0835826	0.246602	2.19e-11	Yes
UVA_TpB	T>G	NoUV_TpN	C>T	-0.194659	-0.291102	-0.0982153	2.63e-11	Yes
UVA_TpN	C>T at CpG	NoUV_TpB	C>T	-0.171167	-0.256005	-0.0863296	2.68e-11	Yes
UVA_TpB	C>T	UVA_TpB	C>A	0.193431	0.0969881	0.289875	3.64e-11	Yes
UVA_TpN	C>T other	UVA_TpB	C>G	0.178873	0.0895841	0.268163	3.86e-11	Yes
UVB_TpB	C>A	NoUV_TpB	C>A	-0.175389	-0.263429	-0.0873488	5.14e-11	Yes
UVA_TpB	C>T other	UVB_TpB	C>A	0.182796	0.0904589	0.275134	7.09e-11	Yes
UVB_TpB	C>T	NoUV_TpB	C>T	0.17417	0.0861295	0.26221	7.34e-11	Yes
NoUV_TpB	C>T	NoUV_TpN	C>A	0.182216	0.0898783	0.274553	8.32e-11	Yes
UVB_TpN	C>A	NoUV_TpB	C>A	-0.167396	-0.252234	-0.082558	8.37e-11	Yes
NoUV_TpN	T>C	UVB_TpN	C>T other	-0.175948	-0.265237	-0.0866589	8.94e-11	Yes
NoUV_TpN	C>T	UVA_TpB	C>A	0.189951	0.0935073	0.286394	9.17e-11	Yes
UVA_TpB	C>T other	UVB_TpN	C>A	0.174803	0.0855138	0.264092	1.24e-10	Yes
UVA_TpN	C>T other	UVB_TpB	C>T at CpG	0.165029	0.0801914	0.249867	1.71e-10	Yes
NoUV_TpN	T>A	UVA_TpN	C>T other	-0.173192	-0.262481	-0.0839029	1.96e-10	Yes
UVA_TpB	C>T at CpG	NoUV_TpB	C>T	-0.177707	-0.270044	-0.0853691	2.88e-10	Yes
NoUV_TpN	C>T other	UVA_TpN	C>G	0.170003	0.0807143	0.259293	4.85e-10	Yes
UVA_TpN	C>T other	NoUV_TpN	C>G	0.169788	0.0804985	0.259077	5.15e-10	Yes
UVA_TpB	T>C	UVA_TpN	C>T	-0.169665	-0.258954	-0.0803755	5.33e-10	Yes
NoUV_TpB	C>T at CpG	NoUV_TpB	C>T	-0.167276	-0.255316	-0.0792356	5.36e-10	Yes
NoUV_TpB	T>G	NoUV_TpN	C>T other	-0.173904	-0.266242	-0.0815668	8.13e-10	Yes
UVB_TpB	T>A	NoUV_TpN	C>T other	-0.173446	-0.265784	-0.0811087	9.21e-10	Yes
UVB_TpN	T>C	UVA_TpN	C>T other	-0.152482	-0.233992	-0.0709726	1.11e-09	Yes
NoUV_TpN	T>G	NoUV_TpB	C>T	-0.172543	-0.264881	-0.080206	1.17e-09	Yes
UVB_TpN	T>A	NoUV_TpN	C>T other	-0.165752	-0.255041	-0.0764624	1.59e-09	Yes
UVB_TpB	C>T other	UVA_TpB	C>T other	0.171255	0.0789179	0.263593	1.66e-09	Yes
UVA_TpN	C>T other	UVB_TpB	C>T other	-0.15734	-0.242178	-0.0725026	1.66e-09	Yes
UVB_TpB	T>C	NoUV_TpN	C>T other	-0.171188	-0.263525	-0.0788505	1.69e-09	Yes
UVA_TpN	C>T other	UVA_TpN	C>A	0.150367	0.0688577	0.231877	2.12e-09	Yes
UVA_TpN	T>A	UVA_TpN	C>T other	-0.150124	-0.231634	-0.0686145	2.29e-09	Yes
UVA_TpB	T>G	NoUV_TpB	C>T	-0.169466	-0.261804	-0.0771288	2.68e-09	Yes
UVA_TpN	C>G	NoUV_TpB	C>A	-0.155519	-0.240357	-0.0706815	2.83e-09	Yes
UVA_TpB	C>T other	UVA_TpN	C>G	0.162927	0.0736374	0.252216	3.48e-09	Yes
UVA_TpN	T>G	UVA_TpN	C>T other	-0.148289	-0.229799	-0.0667796	3.98e-09	Yes
NoUV_TpB	T>G	NoUV_TpB	C>A	-0.15942	-0.247461	-0.0713799	4.9e-09	Yes
NoUV_TpB	T>G	UVA_TpB	C>T other	-0.166827	-0.259165	-0.07449	5.41e-09	Yes
UVB_TpB	T>A	NoUV_TpB	C>A	-0.158962	-0.247002	-0.0709218	5.56e-09	Yes
UVB_TpB	T>A	UVA_TpB	C>T other	-0.166369	-0.258707	-0.0740319	6.1e-09	Yes
NoUV_TpB	C>T	UVA_TpB	C>A	0.164758	0.0724208	0.257096	9.33e-09	Yes
NoUV_TpN	C>T other	UVA_TpB	C>G	0.172035	0.0755918	0.268479	9.44e-09	Yes
UVB_TpN	T>A	NoUV_TpB	C>A	-0.151267	-0.236105	-0.0664297	9.62e-09	Yes
NoUV_TpB	C>T other	UVB_TpB	C>G	0.156858	0.0688178	0.244898	9.94e-09	Yes
UVB_TpB	T>C	NoUV_TpB	C>A	-0.156704	-0.244744	-0.0686635	1.04e-08	Yes
NoUV_TpN	C>T other	UVB_TpB	C>T other	-0.164179	-0.256516	-0.0718411	1.09e-08	Yes
UVB_TpB	T>C	UVA_TpB	C>T other	-0.164111	-0.256449	-0.0717737	1.1e-08	Yes
UVA_TpN	T>C	UVA_TpB	C>T	-0.158676	-0.247966	-0.0693871	1.11e-08	Yes
UVB_TpN	T>A	UVA_TpB	C>T other	-0.158675	-0.247964	-0.0693855	1.11e-08	Yes
NoUV_TpN	C>T other	UVB_TpN	C>T at CpG	0.158254	0.0689648	0.247543	1.24e-08	Yes
NoUV_TpB	T>A	UVA_TpN	C>T other	-0.150195	-0.235033	-0.0653571	1.31e-08	Yes
UVA_TpB	T>A	UVA_TpN	C>T other	-0.157954	-0.247243	-0.0686645	1.35e-08	Yes
UVB_TpN	C>T other	NoUV_TpB	C>A	0.148818	0.0639802	0.233656	1.93e-08	Yes
NoUV_TpN	T>C	UVB_TpB	C>G	0.161425	0.0690871	0.253762	2.22e-08	Yes
NoUV_TpB	T>C	UVA_TpN	C>T	-0.147912	-0.23275	-0.063074	2.49e-08	Yes
NoUV_TpB	C>T other	NoUV_TpB	C>G	0.153308	0.0652674	0.241348	2.62e-08	Yes
UVA_TpN	T>C	NoUV_TpN	C>T	-0.155196	-0.244485	-0.0659064	2.83e-08	Yes
NoUV_TpN	T>A	NoUV_TpN	C>T other	-0.166354	-0.262797	-0.0699106	3.87e-08	Yes
NoUV_TpB	C>T other	UVB_TpN	C>G	0.145771	0.0609329	0.230609	4.53e-08	Yes
NoUV_TpN	C>T other	UVB_TpB	C>T at CpG	0.158191	0.0658536	0.250529	5.11e-08	Yes
UVA_TpB	C>T other	UVA_TpB	C>G	0.164958	0.068515	0.261402	5.45e-08	Yes
NoUV_TpN	T>C	NoUV_TpB	C>G	0.157874	0.0655366	0.250212	5.54e-08	Yes
UVA_TpB	C>G	NoUV_TpB	C>A	-0.157551	-0.249889	-0.0652136	6.01e-08	Yes
UVB_TpN	C>T	NoUV_TpB	C>T	0.144262	0.0594244	0.2291	6.89e-08	Yes
NoUV_TpB	T>C	UVB_TpB	C>G	0.149528	0.0614881	0.237569	7.23e-08	Yes
UVB_TpB	T>G	NoUV_TpB	C>T other	-0.149357	-0.237397	-0.0613164	7.57e-08	Yes
UVB_TpN	C>T at CpG	NoUV_TpB	C>A	-0.14377	-0.228608	-0.058932	7.9e-08	Yes
UVA_TpB	C>T other	UVB_TpN	C>T at CpG	0.151177	0.0618879	0.240466	8.19e-08	Yes
NoUV_TpN	C>T other	NoUV_TpN	C>G	0.16295	0.0665062	0.259393	8.89e-08	Yes
NoUV_TpN	T>C	UVB_TpN	C>G	0.150337	0.0610479	0.239626	1.02e-07	Yes
UVA_TpN	C>T other	NoUV_TpN	C>T at CpG	0.149828	0.0605389	0.239117	1.16e-07	Yes
UVB_TpN	T>G	NoUV_TpB	C>T other	-0.141861	-0.226699	-0.0570232	1.33e-07	Yes
UVB_TpB	T>G	NoUV_TpN	T>C	-0.153923	-0.246261	-0.0615856	1.51e-07	Yes
NoUV_TpB	T>C	NoUV_TpB	C>G	0.145978	0.0579377	0.234018	1.85e-07	Yes
NoUV_TpB	C>T other	UVA_TpN	C>T	-0.140582	-0.22542	-0.0557443	1.89e-07	Yes
NoUV_TpN	T>A	UVA_TpB	C>T other	-0.159277	-0.25572	-0.0628338	2.15e-07	Yes
NoUV_TpN	T>A	NoUV_TpB	C>A	-0.15187	-0.244207	-0.0595324	2.51e-07	Yes
UVB_TpN	T>G	NoUV_TpN	T>C	-0.146427	-0.235717	-0.0571382	2.81e-07	Yes
UVA_TpB	C>T other	UVB_TpB	C>T at CpG	0.151114	0.0587767	0.243452	3.03e-07	Yes
UVB_TpB	C>T at CpG	NoUV_TpB	C>A	-0.143707	-0.231747	-0.0556666	3.34e-07	Yes
NoUV_TpB	C>T other	UVB_TpB	C>A	0.143693	0.0556523	0.231733	3.35e-07	Yes
NoUV_TpB	T>C	UVB_TpN	C>G	0.138441	0.0536032	0.223279	3.38e-07	Yes
UVB_TpN	T>C	NoUV_TpN	C>T other	-0.145644	-0.234933	-0.0563548	3.43e-07	Yes
UVA_TpN	C>T other	UVA_TpN	C>T at CpG	0.132731	0.0512218	0.214241	3.65e-07	Yes
UVA_TpB	C>T other	NoUV_TpN	C>G	0.155873	0.0594294	0.252316	4.82e-07	Yes
NoUV_TpN	C>T	UVB_TpB	C>T	-0.148977	-0.241315	-0.05664	5.13e-07	Yes
UVB_TpB	T>G	NoUV_TpB	T>C	-0.142027	-0.230067	-0.0539866	5.16e-07	Yes
UVA_TpN	C>T other	NoUV_TpN	C>A	0.14378	0.0544905	0.233069	5.51e-07	Yes
NoUV_TpN	C>G	NoUV_TpB	C>A	-0.148465	-0.240803	-0.0561279	5.82e-07	Yes
NoUV_TpN	C>T other	UVA_TpN	C>A	0.143529	0.0542398	0.232818	5.87e-07	Yes
NoUV_TpN	T>C	UVB_TpB	C>A	0.148259	0.0559216	0.240597	6.12e-07	Yes
UVA_TpN	T>A	NoUV_TpN	C>T other	-0.143286	-0.232575	-0.0539967	6.24e-07	Yes
NoUV_TpB	C>T other	UVB_TpN	C>A	0.135699	0.0508615	0.220537	7.02e-07	Yes
UVB_TpN	T>G	NoUV_TpB	T>C	-0.134531	-0.219369	-0.0496935	9.57e-07	Yes
UVA_TpN	T>G	NoUV_TpN	C>T other	-0.141451	-0.23074	-0.0521618	9.91e-07	Yes
UVB_TpN	C>T other	UVA_TpB	C>T other	0.141411	0.0521215	0.2307	1e-06	Yes
UVB_TpB	C>T	UVA_TpB	C>T	0.145497	0.0531592	0.237834	1.2e-06	Yes
NoUV_TpN	T>C	UVB_TpN	C>A	0.140266	0.0509765	0.229555	1.33e-06	Yes
UVA_TpB	T>A	NoUV_TpN	C>T other	-0.151116	-0.247559	-0.0546722	1.46e-06	Yes
UVB_TpN	C>T other	UVA_TpN	C>T other	0.127496	0.0459863	0.209005	1.55e-06	Yes
UVA_TpN	C>T other	UVA_TpB	C>T at CpG	0.13927	0.0499813	0.22856	1.7e-06	Yes
NoUV_TpB	T>A	NoUV_TpN	C>T other	-0.143357	-0.235694	-0.0510193	2e-06	Yes
UVB_TpN	T>C	UVA_TpB	C>T other	-0.138567	-0.227856	-0.049278	2.03e-06	Yes
NoUV_TpB	T>C	UVB_TpB	C>A	0.136363	0.0483226	0.224403	2.17e-06	Yes
UVA_TpB	T>C	UVA_TpB	C>T	-0.14921	-0.245654	-0.0527671	2.25e-06	Yes
UVB_TpN	T>C	NoUV_TpB	C>A	-0.13116	-0.215998	-0.0463221	2.31e-06	Yes
UVA_TpN	T>C	NoUV_TpB	C>T	-0.130003	-0.214841	-0.0451654	3.11e-06	Yes
UVA_TpB	C>T other	UVA_TpN	C>A	0.136452	0.047163	0.225741	3.41e-06	Yes
UVA_TpN	T>A	UVA_TpB	C>T other	-0.136209	-0.225498	-0.0469198	3.61e-06	Yes
NoUV_TpN	T>C	UVA_TpN	C>T	-0.136016	-0.225305	-0.0467265	3.79e-06	Yes
UVA_TpN	C>A	NoUV_TpB	C>A	-0.129045	-0.213883	-0.0442071	3.98e-06	Yes
UVA_TpN	C>T other	NoUV_TpB	C>T at CpG	0.12884	0.044002	0.213678	4.19e-06	Yes
UVA_TpN	T>A	NoUV_TpB	C>A	-0.128802	-0.21364	-0.043964	4.23e-06	Yes
NoUV_TpB	T>C	UVB_TpN	C>A	0.12837	0.0435318	0.213207	4.72e-06	Yes
UVA_TpB	T>C	NoUV_TpN	C>T	-0.14573	-0.242173	-0.0492864	4.94e-06	Yes
UVA_TpN	T>G	UVA_TpB	C>T other	-0.134374	-0.223663	-0.045085	5.63e-06	Yes
UVB_TpN	C>T other	NoUV_TpN	C>T other	0.134334	0.0450447	0.223623	5.69e-06	Yes
NoUV_TpN	T>G	UVA_TpN	C>T other	-0.134107	-0.223397	-0.0448182	6.01e-06	Yes
UVA_TpN	T>G	NoUV_TpB	C>A	-0.126967	-0.211805	-0.0421291	6.74e-06	Yes
UVA_TpB	T>A	UVA_TpB	C>T other	-0.144039	-0.240482	-0.0475953	7.2e-06	Yes
NoUV_TpN	C>T other	NoUV_TpN	C>T at CpG	0.14299	0.0465466	0.239433	9.08e-06	Yes
UVA_TpB	T>A	NoUV_TpB	C>A	-0.136631	-0.228969	-0.0442939	9.66e-06	Yes
NoUV_TpB	T>A	UVA_TpB	C>T other	-0.13628	-0.228617	-0.0439425	1.05e-05	Yes
UVA_TpN	C>T	UVB_TpB	C>T	-0.125043	-0.20988	-0.0402047	1.09e-05	Yes
UVA_TpB	T>G	UVA_TpN	C>T other	-0.13103	-0.220319	-0.041741	1.25e-05	Yes
NoUV_TpB	T>A	NoUV_TpB	C>A	-0.128873	-0.216913	-0.0408323	1.35e-05	Yes
NoUV_TpB	C>T other	UVA_TpN	C>G	0.123823	0.0389851	0.208661	1.48e-05	Yes
NoUV_TpB	T>G	NoUV_TpB	C>T other	-0.127724	-0.215764	-0.0396834	1.78e-05	Yes
UVB_TpB	T>A	NoUV_TpB	C>T other	-0.127266	-0.215306	-0.0392253	1.98e-05	Yes
NoUV_TpN	T>C	UVA_TpN	C>G	0.128389	0.0391001	0.217678	2.32e-05	Yes
NoUV_TpB	T>G	NoUV_TpN	T>C	-0.13229	-0.224628	-0.0399527	2.59e-05	Yes
NoUV_TpN	T>C	UVB_TpB	T>A	0.131832	0.0394946	0.22417	2.87e-05	Yes
NoUV_TpN	C>T other	NoUV_TpN	C>A	0.136942	0.0404982	0.233385	3.36e-05	Yes
UVB_TpB	T>C	NoUV_TpB	C>T other	-0.125007	-0.213048	-0.0369671	3.37e-05	Yes
UVA_TpN	C>T other	UVA_TpB	C>A	0.126322	0.037033	0.215611	3.74e-05	Yes
NoUV_TpN	C>T other	UVA_TpN	C>T at CpG	0.125893	0.036604	0.215182	4.13e-05	Yes
UVB_TpN	T>A	NoUV_TpB	C>T other	-0.119571	-0.204409	-0.0347332	4.17e-05	Yes
UVA_TpB	C>T other	NoUV_TpN	C>T at CpG	0.135913	0.0394698	0.232356	4.18e-05	Yes
NoUV_TpN	T>C	UVB_TpB	T>C	0.129574	0.0372363	0.221911	4.73e-05	Yes
UVA_TpN	T>C	UVB_TpB	C>G	0.11831	0.0334719	0.203147	5.64e-05	Yes
NoUV_TpN	C>T at CpG	NoUV_TpB	C>A	-0.128506	-0.220843	-0.0361684	5.97e-05	Yes
NoUV_TpN	T>C	UVB_TpN	T>A	0.124137	0.0348482	0.213427	6.15e-05	Yes
UVA_TpB	T>C	UVB_TpB	C>G	0.127776	0.0354381	0.220113	7.01e-05	Yes
NoUV_TpB	T>C	UVA_TpB	C>T	-0.127458	-0.219795	-0.0351201	7.51e-05	Yes
NoUV_TpN	C>T other	UVA_TpB	C>T at CpG	0.132432	0.035989	0.228876	8.66e-05	Yes
NoUV_TpB	T>C	UVA_TpN	C>G	0.116493	0.0316554	0.201331	8.67e-05	Yes
NoUV_TpB	T>G	NoUV_TpB	T>C	-0.120394	-0.208434	-0.0323537	9.7e-05	Yes
NoUV_TpB	C>T other	UVA_TpB	C>G	0.125855	0.0335171	0.218192	0.000106059	Yes
NoUV_TpB	T>C	UVB_TpB	T>A	0.119936	0.0318956	0.207976	0.000107542	Yes
UVA_TpN	T>C	NoUV_TpB	C>G	0.114759	0.0299215	0.199597	0.000129951	Yes
NoUV_TpN	T>C	UVA_TpB	C>G	0.130421	0.0339777	0.226864	0.000130935	Yes
UVB_TpB	C>T other	NoUV_TpB	C>T	0.118904	0.030864	0.206945	0.00013549	Yes
UVA_TpB	C>T other	NoUV_TpN	C>A	0.129865	0.0334214	0.226308	0.000146628	Yes
UVA_TpB	T>C	NoUV_TpB	C>G	0.124225	0.0318876	0.216563	0.000150116	Yes
NoUV_TpB	T>C	NoUV_TpN	C>T	-0.123977	-0.216314	-0.0316394	0.000158219	Yes
UVB_TpB	T>C	NoUV_TpB	T>C	-0.117678	-0.205718	-0.0296373	0.000177904	Yes
UVB_TpN	C>T	NoUV_TpN	C>T	0.11907	0.0297807	0.208359	0.00018896	Yes
UVA_TpB	C>T other	UVA_TpN	C>T at CpG	0.118816	0.0295271	0.208106	0.000199659	Yes
NoUV_TpN	C>A	NoUV_TpB	C>A	-0.122457	-0.214795	-0.03012	0.000217801	Yes
NoUV_TpB	T>C	UVB_TpN	T>A	0.112241	0.0274035	0.197079	0.000231597	Yes
NoUV_TpN	C>T other	NoUV_TpB	C>T at CpG	0.122002	0.0296642	0.214339	0.000239541	Yes
NoUV_TpB	C>T other	UVB_TpN	C>T at CpG	0.112073	0.0272356	0.196911	0.000240592	Yes
NoUV_TpN	T>G	NoUV_TpN	C>T other	-0.127269	-0.223713	-0.0308259	0.000247178	Yes
UVA_TpN	T>C	UVB_TpN	C>G	0.107222	0.0257128	0.188732	0.000267771	Yes
UVA_TpN	C>T at CpG	NoUV_TpB	C>A	-0.111409	-0.196247	-0.0265712	0.000279597	Yes
UVA_TpB	T>C	UVB_TpN	C>G	0.116688	0.0273989	0.205977	0.000315591	Yes
NoUV_TpN	T>C	UVB_TpN	C>T at CpG	0.11664	0.0273506	0.205929	0.000318863	Yes
UVB_TpB	T>G	UVA_TpN	T>C	-0.110808	-0.195646	-0.0259705	0.000320051	Yes
UVA_TpB	T>C	NoUV_TpB	C>T	-0.120537	-0.212875	-0.0281999	0.000324458	Yes
UVB_TpB	T>G	UVA_TpB	T>C	-0.120274	-0.212612	-0.0279366	0.000342523	Yes
NoUV_TpN	T>A	NoUV_TpB	C>T other	-0.120173	-0.212511	-0.0278359	0.000349687	Yes
NoUV_TpB	C>T other	UVA_TpB	C>T	-0.120128	-0.212465	-0.0277904	0.000352968	Yes
UVA_TpB	C>T other	UVA_TpB	C>T at CpG	0.125356	0.0289122	0.221799	0.000360965	Yes
UVB_TpN	C>T	UVA_TpB	C>T	0.115589	0.0262999	0.204878	0.000398529	Yes
NoUV_TpN	T>C	NoUV_TpN	T>A	0.12474	0.0282964	0.221183	0.000407253	Yes
UVA_TpB	T>G	NoUV_TpN	C>T other	-0.124192	-0.220635	-0.0277487	0.000453171	Yes
NoUV_TpB	T>C	UVA_TpB	C>G	0.118525	0.0261874	0.210862	0.000489505	Yes
UVA_TpN	C>T	NoUV_TpB	C>A	0.108886	0.0240478	0.193723	0.000490872	Yes
UVA_TpB	C>T at CpG	NoUV_TpB	C>A	-0.117948	-0.210286	-0.0256107	0.000550031	Yes
NoUV_TpB	C>T other	UVB_TpB	C>T at CpG	0.11201	0.0239701	0.200051	0.000604679	Yes
UVB_TpN	T>G	UVA_TpN	T>C	-0.103313	-0.184822	-0.021803	0.000660534	Yes
NoUV_TpB	C>T other	NoUV_TpN	C>G	0.116769	0.0244315	0.209106	0.000696864	Yes
NoUV_TpB	C>T other	NoUV_TpN	C>T	-0.116647	-0.208985	-0.0243096	0.000714014	Yes
UVB_TpN	T>G	UVA_TpB	T>C	-0.112778	-0.202068	-0.0234892	0.000716661	Yes
NoUV_TpN	T>C	UVB_TpB	C>T at CpG	0.116577	0.0242394	0.208914	0.000724083	Yes
NoUV_TpN	T>C	NoUV_TpN	C>G	0.121335	0.024892	0.217779	0.000785163	Yes
NoUV_TpN	T>G	UVA_TpB	C>T other	-0.120192	-0.216636	-0.0237491	0.000974704	Yes
UVA_TpB	C>T other	NoUV_TpB	C>T at CpG	0.114925	0.0225874	0.207262	0.00100398	Yes
UVA_TpB	T>C	UVB_TpB	C>A	0.11461	0.0222726	0.206948	0.00106791	Yes
UVA_TpN	T>C	UVB_TpB	C>A	0.105144	0.0203064	0.189982	0.00110425	Yes
NoUV_TpN	C>T other	UVA_TpB	C>A	0.119484	0.0230407	0.215927	0.00111328	Yes
NoUV_TpB	T>C	UVB_TpN	C>T at CpG	0.104744	0.0199059	0.189581	0.00120228	Yes
NoUV_TpB	T>C	NoUV_TpN	T>A	0.112844	0.0205062	0.205181	0.00150486	Yes
NoUV_TpN	T>G	NoUV_TpB	C>A	-0.112785	-0.205123	-0.0204476	0.00152192	Yes
NoUV_TpB	C>T at CpG	NoUV_TpB	C>A	-0.107518	-0.195558	-0.0194772	0.00152771	Yes
UVA_TpB	T>G	UVA_TpB	C>T other	-0.117115	-0.213559	-0.0206719	0.00172595	Yes
NoUV_TpN	T>C	UVA_TpB	C>T	-0.115561	-0.212005	-0.0191181	0.00228904	Yes
UVA_TpB	T>C	UVB_TpN	C>A	0.106617	0.0173275	0.195906	0.00246096	Yes
UVA_TpN	T>C	UVB_TpN	C>A	0.0971508	0.0156413	0.17866	0.00255491	Yes
NoUV_TpB	T>C	UVB_TpB	C>T at CpG	0.104681	0.0166404	0.192721	0.00268548	Yes
UVA_TpB	T>G	NoUV_TpB	C>A	-0.109708	-0.202045	-0.0173705	0.00272697	Yes
NoUV_TpB	T>C	NoUV_TpN	C>G	0.109439	0.0171018	0.201777	0.00286696	Yes
UVB_TpN	T>C	NoUV_TpB	C>T other	-0.0994634	-0.184301	-0.0146256	0.00356794	Yes
UVB_TpN	C>T	UVA_TpN	C>T	0.095135	0.0136254	0.176644	0.00389804	Yes
UVA_TpB	C>T other	UVA_TpB	C>A	0.112407	0.0159639	0.208851	0.00400713	Yes
UVB_TpN	T>C	NoUV_TpN	T>C	-0.10403	-0.193319	-0.0147406	0.00403679	Yes
NoUV_TpN	T>C	NoUV_TpN	C>T	-0.112081	-0.208524	-0.0156374	0.00424186	Yes
NoUV_TpB	C>T other	UVA_TpN	C>A	0.0973484	0.0125107	0.182186	0.00541614	Yes
UVA_TpN	T>A	NoUV_TpB	C>T other	-0.0971053	-0.181943	-0.0122675	0.00567839	Yes
NoUV_TpN	T>C	UVA_TpN	C>A	0.101915	0.0126257	0.191204	0.00598493	Yes
NoUV_TpN	T>C	UVA_TpN	T>A	0.101672	0.0123825	0.190961	0.0062581	Yes
UVA_TpB	C>A	NoUV_TpB	C>A	-0.105	-0.197337	-0.0126625	0.00641828	Yes
UVA_TpB	C>T other	UVA_TpN	C>T	-0.101478	-0.190768	-0.0121891	0.00648359	Yes
UVA_TpB	T>A	NoUV_TpB	C>T other	-0.104935	-0.197272	-0.0125975	0.00649252	Yes
NoUV_TpN	T>C	UVA_TpB	T>A	0.109501	0.013058	0.205945	0.00660286	Yes
UVA_TpN	T>C	UVA_TpN	C>T other	-0.0915672	-0.173077	-0.0100576	0.00801951	Yes
UVA_TpN	T>G	NoUV_TpB	C>T other	-0.0952704	-0.180108	-0.0104326	0.00807396	Yes
NoUV_TpB	T>C	NoUV_TpB	C>T	-0.0987845	-0.186825	-0.0107442	0.00819608	Yes
UVA_TpN	T>G	NoUV_TpN	T>C	-0.0998368	-0.189126	-0.0105476	0.00872564	Yes
NoUV_TpB	T>A	NoUV_TpB	C>T other	-0.0971762	-0.185217	-0.00913587	0.0109552	Yes
NoUV_TpN	T>C	NoUV_TpB	T>A	0.101743	0.00940513	0.19408	0.011289	Yes
UVB_TpN	T>C	NoUV_TpB	T>C	-0.0921337	-0.176971	-0.00729589	0.0144381	Yes
UVA_TpN	C>T other	UVA_TpN	C>T	-0.0875633	-0.169073	-0.00605384	0.0172631	Yes
NoUV_TpB	T>G	UVA_TpB	T>C	-0.0986411	-0.190979	-0.00630366	0.0188965	Yes
UVA_TpB	T>C	UVB_TpB	T>A	0.098183	0.00584556	0.190521	0.0203508	Yes
NoUV_TpB	T>C	UVA_TpN	C>A	0.0900187	0.00518094	0.174857	0.0210393	Yes
UVA_TpB	T>C	UVA_TpN	C>G	0.0947403	0.00545108	0.184029	0.0210452	Yes
NoUV_TpB	T>C	UVA_TpN	T>A	0.0897756	0.00493778	0.174613	0.0219519	Yes
NoUV_TpN	C>T other	UVA_TpN	C>T	-0.0944015	-0.183691	-0.00511227	0.0222613	Yes
NoUV_TpB	T>C	UVA_TpB	T>A	0.0976052	0.00526774	0.189943	0.0223293	Yes
NoUV_TpN	T>C	NoUV_TpN	C>T at CpG	0.101376	0.00493243	0.197819	0.0243539	Yes
NoUV_TpB	T>G	UVA_TpN	T>C	-0.0891753	-0.174013	-0.00433751	0.0243597	Yes
UVB_TpN	C>T other	NoUV_TpB	C>T	0.0890597	0.0042219	0.173897	0.0248499	Yes
NoUV_TpB	C>T other	NoUV_TpN	C>T at CpG	0.0968094	0.0044719	0.189147	0.0253384	Yes
UVA_TpN	T>C	UVA_TpN	C>G	0.0852744	0.00376492	0.166784	0.026178	Yes
UVA_TpN	T>C	UVB_TpB	T>A	0.0887172	0.00387941	0.173555	0.0263544	Yes
UVB_TpB	T>C	UVA_TpB	T>C	-0.0959248	-0.188262	-0.00358731	0.0291064	Yes
NoUV_TpB	C>T other	NoUV_TpB	C>T	-0.0914548	-0.179495	-0.00341446	0.0291345	Yes
UVA_TpN	T>G	NoUV_TpB	T>C	-0.0879407	-0.172778	-0.0031029	0.030072	Yes
NoUV_TpB	T>C	NoUV_TpB	T>A	0.0898465	0.00180615	0.177887	0.0377363	Yes
UVA_TpN	T>C	UVB_TpB	T>C	0.0864589	0.00162115	0.171297	0.0384832	Yes
UVB_TpB	C>T other	NoUV_TpN	C>T	0.093712	0.00137454	0.18605	0.0408052	Yes
UVA_TpB	T>C	UVB_TpN	T>A	0.0904884	0.0011992	0.179778	0.0416337	Yes
UVA_TpB	T>C	UVA_TpB	C>G	0.096772	0.000328661	0.193215	0.0477493	Yes
UVB_TpN	C>T other	UVB_TpB	C>T	-0.0851101	-0.169948	-0.000272312	0.0478776	Yes
UVA_TpN	T>C	UVB_TpN	T>A	0.0810225	-0.000486963	0.162532	0.0541685	Yes
NoUV_TpN	T>C	NoUV_TpN	C>A	0.0953274	-0.00111598	0.191771	0.0583427	Yes
NoUV_TpB	C>T other	NoUV_TpN	C>A	0.090761	-0.00157651	0.183098	0.0627126	Yes
UVA_TpN	T>C	UVA_TpB	C>G	0.0873062	-0.00198303	0.176595	0.0670409	Yes
UVB_TpB	C>T other	UVA_TpB	C>T	0.0902312	-0.00210625	0.182569	0.0675639	Yes
NoUV_TpB	T>C	NoUV_TpN	C>T at CpG	0.0894797	-0.00285782	0.181817	0.074991	Yes
UVA_TpB	C>T	NoUV_TpB	C>A	0.0884314	-0.00390604	0.180769	0.086487	Yes
UVA_TpN	T>C	NoUV_TpN	C>T other	-0.084729	-0.174018	0.00456016	0.0963388	Yes
UVA_TpB	T>C	NoUV_TpN	T>A	0.0910908	-0.00535257	0.187534	0.101652	No
NoUV_TpN	T>C	UVA_TpN	C>T at CpG	0.084279	-0.00501023	0.173568	0.102406	No
NoUV_TpN	T>C	UVA_TpB	C>T at CpG	0.0908182	-0.00562519	0.187262	0.105168	No
NoUV_TpN	T>C	NoUV_TpB	C>T	-0.0868884	-0.179226	0.00544909	0.106036	No
NoUV_TpB	C>T other	UVA_TpN	C>T at CpG	0.0797126	-0.00512523	0.16455	0.107824	No
NoUV_TpB	C>T other	UVA_TpB	C>T at CpG	0.0862518	-0.00608573	0.178589	0.115084	No
UVA_TpB	T>C	UVB_TpN	C>T at CpG	0.0829908	-0.00629842	0.17228	0.121503	No
NoUV_TpB	C>T at CpG	UVB_TpB	C>G	0.081037	-0.00700332	0.169077	0.134796	No
NoUV_TpN	C>T	NoUV_TpB	C>A	0.0849507	-0.00738683	0.177288	0.135491	No
UVA_TpB	T>C	UVA_TpN	C>T other	-0.0821013	-0.17139	0.00718789	0.136269	No
UVA_TpN	T>C	NoUV_TpN	T>A	0.0816249	-0.00766426	0.170914	0.144734	No
UVA_TpN	C>T at CpG	UVB_TpB	C>G	0.0771456	-0.00769221	0.161983	0.152748	No
UVA_TpB	T>C	NoUV_TpN	C>G	0.0876864	-0.00875698	0.18413	0.152967	No
UVB_TpB	C>G	UVA_TpB	C>A	-0.0835546	-0.175892	0.00878286	0.160416	No
NoUV_TpB	T>C	NoUV_TpN	C>A	0.0834312	-0.00890623	0.175769	0.162776	No
UVA_TpN	T>C	UVB_TpN	C>T at CpG	0.0735249	-0.00798459	0.155034	0.165467	No
UVA_TpB	T>C	UVB_TpB	C>T at CpG	0.0829279	-0.0094096	0.175265	0.172675	No
NoUV_TpN	T>G	NoUV_TpN	T>C	-0.0856551	-0.182098	0.0107883	0.191894	No
NoUV_TpB	C>T at CpG	NoUV_TpB	C>G	0.0774866	-0.0105537	0.165527	0.208446	No
NoUV_TpN	T>G	NoUV_TpB	C>T other	-0.0810887	-0.173426	0.0112488	0.21262	No
UVA_TpN	T>C	NoUV_TpN	C>G	0.0782205	-0.0110687	0.16751	0.217273	No
NoUV_TpN	T>C	NoUV_TpB	C>T at CpG	0.0803875	-0.01195	0.172725	0.229434	No
UVA_TpN	T>C	UVA_TpB	C>T other	-0.0776522	-0.166941	0.011637	0.231516	No
UVA_TpN	C>T at CpG	NoUV_TpB	C>G	0.0735952	-0.0112426	0.158433	0.236559	No
NoUV_TpB	C>G	UVA_TpB	C>A	-0.0800042	-0.172342	0.0123333	0.238999	No
UVA_TpN	T>C	UVB_TpB	C>T at CpG	0.073462	-0.0113758	0.1583	0.240218	No
NoUV_TpB	C>T other	NoUV_TpB	C>T at CpG	0.0758211	-0.0122192	0.163861	0.251407	No
UVA_TpB	T>G	NoUV_TpN	T>C	-0.0825779	-0.179021	0.0138655	0.263613	No
NoUV_TpB	T>C	UVA_TpB	C>T at CpG	0.078922	-0.0134154	0.17126	0.267413	No
UVA_TpB	T>G	UVB_TpB	C>G	0.0788466	-0.0134908	0.171184	0.269469	No
NoUV_TpB	T>C	UVA_TpN	C>T at CpG	0.0723828	-0.012455	0.157221	0.271254	No
UVA_TpB	T>G	NoUV_TpB	C>T other	-0.0780115	-0.170349	0.014326	0.292906	No
UVA_TpB	C>T other	UVA_TpB	C>T	-0.0810242	-0.177468	0.0154192	0.305635	No
UVB_TpB	T>G	NoUV_TpB	C>T at CpG	-0.0735356	-0.161576	0.0145047	0.319078	No
UVA_TpN	T>C	NoUV_TpB	C>A	-0.0702449	-0.155083	0.0145929	0.339699	No
NoUV_TpB	C>T at CpG	UVB_TpN	C>G	0.0699496	-0.0148882	0.154787	0.349834	No
UVB_TpB	T>G	UVA_TpB	C>A	-0.0760532	-0.168391	0.0162843	0.35238	No
UVB_TpB	C>T other	UVA_TpN	C>T	0.0697771	-0.0150607	0.154615	0.355826	No
UVB_TpB	T>G	UVA_TpN	C>T at CpG	-0.0696441	-0.154482	0.0151936	0.360478	No
NoUV_TpN	T>G	UVB_TpB	C>G	0.0757695	-0.016568	0.168107	0.361486	No
UVA_TpB	T>G	NoUV_TpB	C>G	0.0752962	-0.0170413	0.167634	0.37693	No
UVB_TpN	C>G	UVA_TpB	C>A	-0.0724672	-0.161756	0.016822	0.388713	No
UVA_TpN	C>T at CpG	UVB_TpN	C>G	0.0660582	-0.0154513	0.147568	0.392319	No
NoUV_TpN	T>C	UVA_TpB	C>A	0.0778699	-0.0185734	0.174313	0.401723	No
UVA_TpB	C>T other	NoUV_TpN	C>T	-0.0775434	-0.173987	0.0189	0.412382	No
NoUV_TpN	T>G	NoUV_TpB	T>C	-0.0737589	-0.166096	0.0185785	0.42907	No
NoUV_TpB	C>T other	UVA_TpB	C>A	0.0733035	-0.019034	0.165641	0.445022	No
UVB_TpN	T>C	UVA_TpB	T>C	-0.0703808	-0.15967	0.0189084	0.463467	No
UVA_TpB	T>C	UVA_TpB	T>A	0.0758523	-0.020591	0.172296	0.469205	No
NoUV_TpN	T>G	NoUV_TpB	C>G	0.0722191	-0.0201184	0.164557	0.483735	No
UVA_TpB	T>C	NoUV_TpN	C>T other	-0.0752632	-0.171707	0.0211802	0.489521	No
UVB_TpN	T>G	NoUV_TpB	C>T at CpG	-0.0660398	-0.150878	0.0187979	0.496092	No
NoUV_TpB	T>C	NoUV_TpB	C>T at CpG	0.0684914	-0.0195489	0.156532	0.497668	No
UVB_TpB	T>G	UVA_TpB	T>G	-0.0713452	-0.163683	0.0209923	0.515498	No
NoUV_TpB	C>T at CpG	UVB_TpB	C>A	0.0678715	-0.0201688	0.155912	0.521387	No
UVB_TpN	T>G	UVA_TpB	C>A	-0.0685575	-0.157847	0.0207317	0.531884	No
NoUV_TpN	C>T other	UVA_TpB	C>T	-0.0739473	-0.170391	0.022496	0.535511	No
UVA_TpB	T>G	NoUV_TpB	T>C	-0.0706818	-0.163019	0.0216557	0.539825	No
UVA_TpB	C>T at CpG	UVB_TpB	C>G	0.0706064	-0.0217311	0.162944	0.542596	No
UVA_TpB	T>C	UVA_TpN	C>A	0.0682659	-0.0210233	0.157555	0.542962	No
UVB_TpN	T>G	UVA_TpN	C>T at CpG	-0.0621484	-0.143658	0.0193611	0.550026	No
UVB_TpB	C>A	UVA_TpB	C>A	-0.0703891	-0.162727	0.0219483	0.550587	No
UVA_TpB	T>C	UVA_TpN	T>A	0.0680227	-0.0212665	0.157312	0.552212	No
UVA_TpB	T>G	UVB_TpN	C>G	0.0677592	-0.0215299	0.157048	0.56224	No
UVA_TpN	C>T at CpG	UVB_TpB	C>A	0.0639801	-0.0208577	0.148818	0.578306	No
UVA_TpN	C>T other	UVA_TpB	C>T	-0.0671092	-0.156398	0.02218	0.58697	No
UVB_TpN	T>C	UVA_TpN	T>C	-0.060915	-0.142424	0.0205946	0.601393	No
UVA_TpN	T>C	UVA_TpB	T>A	0.0663865	-0.0229027	0.155676	0.61434	No
UVA_TpN	T>G	UVA_TpB	T>C	-0.0661878	-0.155477	0.0231014	0.621825	No
NoUV_TpN	T>G	UVB_TpB	T>G	0.068268	-0.0240694	0.160606	0.628341	No
UVA_TpB	T>C	NoUV_TpB	T>A	0.0680936	-0.0242439	0.160431	0.634659	No
NoUV_TpN	C>T other	NoUV_TpN	C>T	-0.0704665	-0.16691	0.0259768	0.657192	No
UVA_TpB	C>T at CpG	NoUV_TpB	C>G	0.067056	-0.0252815	0.159393	0.671768	No
UVA_TpN	T>G	UVB_TpB	C>G	0.0615877	-0.0232501	0.146426	0.67261	No
NoUV_TpN	T>G	UVB_TpN	C>G	0.0646821	-0.0246071	0.153971	0.677602	No
UVA_TpN	T>C	UVA_TpN	C>A	0.0588	-0.0227095	0.14031	0.687366	No
UVA_TpN	T>C	UVA_TpN	T>A	0.0585568	-0.0229527	0.140066	0.696915	No
UVB_TpB	C>G	NoUV_TpN	C>A	-0.0660972	-0.158435	0.0262403	0.705109	No
UVB_TpN	C>T other	NoUV_TpN	C>T	0.0638674	-0.0254218	0.153157	0.706796	No
UVB_TpN	T>G	UVA_TpB	T>G	-0.0638495	-0.153139	0.0254397	0.707428	No
NoUV_TpB	T>C	UVA_TpB	C>A	0.0659738	-0.0263637	0.158311	0.709318	No
UVA_TpN	C>T other	NoUV_TpN	C>T	-0.0636284	-0.152918	0.0256608	0.71519	No
NoUV_TpB	T>C	UVA_TpN	C>T other	-0.0603484	-0.145186	0.0244894	0.719147	No
UVA_TpB	T>G	UVB_TpB	C>A	0.0656811	-0.0266563	0.158019	0.719218	No
UVA_TpB	T>C	UVA_TpB	C>T other	-0.0681863	-0.16463	0.028257	0.732474	No
NoUV_TpB	C>T at CpG	UVB_TpN	C>A	0.0598782	-0.0249596	0.144716	0.736165	No
UVA_TpN	T>A	UVB_TpB	C>G	0.0597528	-0.0250849	0.144591	0.740633	No
UVA_TpB	T>C	NoUV_TpN	C>T at CpG	0.0677268	-0.0287166	0.16417	0.746855	No
UVB_TpB	C>G	UVA_TpN	C>A	-0.0595097	-0.144347	0.0253281	0.749214	No
UVB_TpN	C>A	UVA_TpB	C>A	-0.0623958	-0.151685	0.0268934	0.757034	No
UVA_TpN	T>G	UVA_TpN	T>C	-0.056722	-0.138231	0.0247875	0.765514	No
UVA_TpN	T>C	NoUV_TpB	T>A	0.0586278	-0.02621	0.143466	0.779307	No
UVA_TpN	C>T at CpG	UVB_TpN	C>A	0.0559867	-0.0255228	0.137496	0.790928	No
UVA_TpN	T>G	NoUV_TpB	C>G	0.0580373	-0.0268005	0.142875	0.798475	No
UVB_TpB	T>G	UVA_TpB	C>T at CpG	-0.0631049	-0.155442	0.0292325	0.800305	No
UVB_TpN	T>G	NoUV_TpN	T>G	-0.0607723	-0.150062	0.0285169	0.807726	No
NoUV_TpB	C>T	NoUV_TpB	C>A	0.0597583	-0.028282	0.147799	0.812595	No
NoUV_TpN	T>G	UVB_TpB	C>A	0.062604	-0.0297335	0.154941	0.814589	No
NoUV_TpB	T>A	UVB_TpB	C>G	0.0596819	-0.0283584	0.147722	0.814842	No
NoUV_TpB	C>G	NoUV_TpN	C>A	-0.0625467	-0.154884	0.0297907	0.816187	No
UVB_TpN	C>T other	UVB_TpN	C>T	-0.0552025	-0.136712	0.026307	0.816491	No
UVB_TpN	T>C	UVB_TpB	C>G	0.0573947	-0.0274431	0.142233	0.818361	No
UVB_TpN	C>T other	UVA_TpB	C>T	0.0603866	-0.0289026	0.149676	0.818923	No
UVA_TpB	C>T at CpG	UVB_TpN	C>G	0.059519	-0.0297702	0.148808	0.842811	No
UVA_TpN	T>A	NoUV_TpB	C>G	0.0562024	-0.0286354	0.14104	0.852373	No
NoUV_TpB	C>G	UVA_TpN	C>A	-0.0559593	-0.140797	0.0288785	0.858828	No
UVA_TpB	T>C	NoUV_TpB	C>A	-0.0607791	-0.153117	0.0315584	0.861866	No
UVA_TpN	T>C	NoUV_TpN	C>T at CpG	0.0582609	-0.0310283	0.14755	0.874103	No
NoUV_TpN	C>T at CpG	UVB_TpB	C>G	0.0600487	-0.0322887	0.152386	0.878578	No
UVA_TpB	T>G	UVB_TpN	C>A	0.0576878	-0.0316014	0.146977	0.887002	No
UVA_TpB	T>C	NoUV_TpN	C>A	0.0616784	-0.034765	0.158122	0.899273	No
NoUV_TpB	T>A	NoUV_TpB	C>G	0.0561315	-0.0319088	0.144172	0.902779	No
UVA_TpN	T>G	UVB_TpB	T>G	0.0540863	-0.0307515	0.138924	0.902849	No
UVB_TpN	T>C	NoUV_TpB	C>G	0.0538443	-0.0309935	0.138682	0.907795	No
UVB_TpB	T>G	NoUV_TpN	C>A	-0.0585957	-0.150933	0.0337418	0.907951	No
UVB_TpB	C>T other	UVB_TpB	C>T	-0.0552654	-0.143306	0.0327749	0.919136	No
UVA_TpN	C>T other	NoUV_TpB	C>T other	0.0530187	-0.0318191	0.137856	0.923408	No
UVB_TpN	T>G	UVA_TpB	C>T at CpG	-0.0556092	-0.144898	0.03368	0.926588	No
UVA_TpB	C>T at CpG	UVB_TpB	C>A	0.0574409	-0.0348966	0.149778	0.92764	No
UVA_TpN	T>G	UVB_TpN	C>G	0.0505003	-0.0310092	0.13201	0.931214	No
UVB_TpN	C>G	NoUV_TpN	C>A	-0.0550098	-0.144299	0.0342794	0.935956	No
UVB_TpB	T>G	UVA_TpN	T>A	-0.0522514	-0.137089	0.0325864	0.936205	No
UVB_TpB	T>G	UVA_TpN	C>A	-0.0520083	-0.136846	0.0328295	0.939927	No
NoUV_TpN	C>T at CpG	NoUV_TpB	C>G	0.0564983	-0.0358392	0.148836	0.941393	No
NoUV_TpN	T>G	UVB_TpN	C>A	0.0546106	-0.0346786	0.1439	0.941707	No
UVA_TpN	T>A	UVB_TpN	C>G	0.0486654	-0.0328441	0.130175	0.95788	No
UVB_TpN	C>G	UVA_TpN	C>A	-0.0484223	-0.129932	0.0330872	0.960734	No
UVA_TpB	T>C	UVA_TpB	C>T at CpG	0.0571692	-0.0392742	0.153613	0.961927	No
UVB_TpB	T>G	NoUV_TpB	T>A	-0.0521805	-0.140221	0.0358598	0.962005	No
NoUV_TpB	T>G	NoUV_TpB	C>T at CpG	-0.0519026	-0.139943	0.0361377	0.964795	No
NoUV_TpB	T>G	UVA_TpB	C>A	-0.0544202	-0.146758	0.0379173	0.96494	No
UVB_TpB	T>G	UVB_TpN	T>C	-0.0498933	-0.134731	0.0349445	0.966006	No
UVA_TpN	T>C	NoUV_TpN	C>A	0.0522125	-0.0370767	0.141502	0.968716	No
UVB_TpB	T>A	UVA_TpB	C>A	-0.0539621	-0.1463	0.0383754	0.968995	No
UVB_TpB	T>A	NoUV_TpB	C>T at CpG	-0.0514445	-0.139485	0.0365958	0.969051	No
NoUV_TpB	T>C	NoUV_TpN	C>T other	-0.0535103	-0.145848	0.0388272	0.972633	No
UVA_TpN	C>T	NoUV_TpB	C>T	0.0491273	-0.0357105	0.133965	0.97294	No
NoUV_TpN	C>A	UVB_TpB	C>A	0.0529317	-0.0394058	0.145269	0.9768	No
NoUV_TpB	T>A	UVB_TpN	C>G	0.0485945	-0.0362433	0.133432	0.977078	No
UVB_TpN	T>G	NoUV_TpN	C>A	-0.0511	-0.140389	0.0381892	0.977382	No
UVB_TpN	T>G	UVA_TpN	T>G	-0.0465905	-0.1281	0.034919	0.977807	No
UVA_TpN	T>G	UVB_TpB	C>A	0.0484222	-0.0364156	0.13326	0.978305	No
UVB_TpB	T>G	NoUV_TpN	C>T at CpG	-0.0525473	-0.144885	0.0397902	0.979282	No
UVB_TpN	T>C	UVB_TpN	C>G	0.0463073	-0.0352022	0.127817	0.979821	No
UVA_TpB	T>C	UVA_TpN	C>T at CpG	0.05063	-0.0386592	0.139919	0.980422	No
UVA_TpB	C>T other	NoUV_TpB	C>T	-0.052351	-0.144689	0.0399864	0.980465	No
NoUV_TpB	T>G	UVA_TpN	C>T at CpG	-0.0480112	-0.132849	0.0368266	0.981023	No
NoUV_TpB	C>T at CpG	UVA_TpN	C>G	0.0480018	-0.036836	0.13284	0.981082	No
UVA_TpN	C>G	UVA_TpB	C>A	-0.0505194	-0.139809	0.0387698	0.981088	No
UVA_TpB	T>A	UVB_TpB	C>G	0.0519232	-0.0404143	0.144261	0.98286	No
UVB_TpB	T>A	UVA_TpN	C>T at CpG	-0.0475531	-0.132391	0.0372847	0.983726	No
UVB_TpB	T>C	UVA_TpB	C>A	-0.0517039	-0.144041	0.0406336	0.983994	No
UVB_TpB	T>C	NoUV_TpB	C>T at CpG	-0.0491863	-0.137227	0.0388541	0.984573	No
UVA_TpB	C>T at CpG	UVB_TpN	C>A	0.0494475	-0.0398417	0.138737	0.986653	No
UVA_TpN	T>A	UVB_TpB	C>A	0.0465874	-0.0382504	0.131425	0.988417	No
UVB_TpN	T>G	UVA_TpN	T>A	-0.0447557	-0.126265	0.0367538	0.988435	No
NoUV_TpN	C>T at CpG	UVB_TpN	C>G	0.0489614	-0.0403278	0.138251	0.988696	No
UVA_TpN	C>A	UVB_TpB	C>A	0.0463442	-0.0384936	0.131182	0.989405	No
UVB_TpN	T>G	UVA_TpN	C>A	-0.0445125	-0.126022	0.036997	0.98946	No
UVA_TpB	C>G	UVA_TpB	C>A	-0.0525511	-0.148994	0.0438923	0.989855	No
NoUV_TpN	T>C	UVA_TpN	C>T other	-0.0484523	-0.137742	0.0408369	0.990554	No
NoUV_TpB	C>T at CpG	UVA_TpB	C>G	0.0500335	-0.042304	0.142371	0.990791	No
UVA_TpN	C>T at CpG	UVA_TpN	C>G	0.0441103	-0.0373992	0.12562	0.990992	No
NoUV_TpN	T>G	UVA_TpB	T>C	-0.0520061	-0.148449	0.0444373	0.991539	No
UVA_TpB	T>G	NoUV_TpB	T>G	0.0497122	-0.0426252	0.14205	0.991774	No
UVA_TpN	T>C	UVA_TpB	C>T at CpG	0.0477033	-0.0415859	0.136993	0.992825	No
UVB_TpB	T>C	UVA_TpN	C>T at CpG	-0.0452948	-0.130133	0.039543	0.992911	No
UVA_TpB	T>G	UVB_TpB	T>A	0.0492541	-0.0430833	0.141592	0.993026	No
NoUV_TpB	T>A	UVB_TpB	C>A	0.0465164	-0.0415239	0.134557	0.994134	No
UVB_TpN	C>T at CpG	UVB_TpB	C>G	0.0447848	-0.040053	0.129623	0.994228	No
UVB_TpN	T>G	NoUV_TpB	T>A	-0.0446848	-0.129523	0.040153	0.994461	No
UVA_TpB	T>A	NoUV_TpB	C>G	0.0483728	-0.0439647	0.14071	0.994989	No
UVB_TpN	T>C	UVB_TpB	C>A	0.0442292	-0.0406085	0.129067	0.995423	No
UVB_TpN	T>G	UVB_TpN	T>C	-0.0423976	-0.123907	0.0391119	0.995615	No
UVB_TpN	T>A	UVA_TpB	C>A	-0.0462675	-0.135557	0.0430217	0.995921	No
UVA_TpN	C>T at CpG	UVA_TpB	C>G	0.046142	-0.0431471	0.135431	0.996127	No
UVB_TpN	T>A	NoUV_TpB	C>T at CpG	-0.0437499	-0.128588	0.0410879	0.996279	No
UVA_TpB	T>G	UVA_TpN	C>G	0.0458114	-0.0434778	0.135101	0.996627	No
UVB_TpB	C>T at CpG	UVB_TpB	C>G	0.0448477	-0.0431927	0.132888	0.997068	No
UVA_TpB	T>G	UVB_TpB	T>C	0.0469959	-0.0453416	0.139333	0.997117	No
NoUV_TpN	C>T at CpG	UVB_TpB	C>A	0.0468833	-0.0454542	0.139221	0.99725	No
UVA_TpB	T>G	UVA_TpB	T>C	-0.0489289	-0.145372	0.0475145	0.997293	No
UVA_TpB	T>C	NoUV_TpB	C>T at CpG	0.0467385	-0.045599	0.139076	0.997413	No
NoUV_TpN	T>G	NoUV_TpB	T>G	0.0466351	-0.0457024	0.138973	0.997525	No
UVA_TpN	T>C	UVA_TpN	C>T at CpG	0.0411641	-0.0403454	0.122674	0.997528	No
UVB_TpN	T>G	NoUV_TpN	C>T at CpG	-0.0450516	-0.134341	0.0442376	0.997573	No
UVB_TpN	C>A	NoUV_TpN	C>A	-0.0449383	-0.134228	0.0443509	0.997692	No
NoUV_TpB	T>C	UVA_TpB	C>T other	-0.0464335	-0.138771	0.045904	0.99773	No
NoUV_TpN	C>T other	NoUV_TpB	C>T other	0.0461806	-0.0461569	0.138518	0.997967	No
NoUV_TpN	T>G	UVB_TpB	T>A	0.046177	-0.0461605	0.138514	0.99797	No
UVA_TpB	T>G	UVA_TpB	C>G	0.0478431	-0.0486002	0.144286	0.998278	No
UVA_TpN	T>G	UVB_TpN	C>A	0.0404289	-0.0410806	0.121938	0.998283	No
NoUV_TpN	C>T other	NoUV_TpB	C>T	-0.0452742	-0.137612	0.0470633	0.998649	No
UVB_TpN	C>T other	UVA_TpN	C>T	0.0399324	-0.0415771	0.121442	0.998672	No
UVB_TpN	T>A	UVA_TpN	C>T at CpG	-0.0398584	-0.121368	0.0416511	0.998723	No
UVB_TpN	C>T at CpG	NoUV_TpB	C>G	0.0412343	-0.0436034	0.126072	0.998877	No
NoUV_TpN	T>A	UVA_TpB	C>A	-0.0468699	-0.143313	0.0495735	0.99888	No
UVA_TpN	T>C	NoUV_TpN	T>C	-0.0431148	-0.132404	0.0461743	0.999024	No
UVB_TpB	T>G	UVA_TpB	T>A	-0.0444218	-0.136759	0.0479157	0.999099	No
NoUV_TpN	T>A	NoUV_TpB	C>T at CpG	-0.0443523	-0.13669	0.0479852	0.999129	No
NoUV_TpN	T>G	UVA_TpN	C>G	0.0427342	-0.046555	0.132023	0.999194	No
NoUV_TpN	T>G	UVA_TpN	T>C	-0.0425402	-0.131829	0.046749	0.99927	No
NoUV_TpN	T>G	UVB_TpB	T>C	0.0439187	-0.0484187	0.136256	0.999297	No
UVA_TpN	T>A	UVB_TpN	C>A	0.038594	-0.0429155	0.120104	0.999364	No
UVB_TpN	C>A	UVA_TpN	C>A	-0.0383508	-0.11986	0.0431587	0.999447	No
UVB_TpB	C>T at CpG	NoUV_TpB	C>G	0.0412972	-0.0467431	0.129338	0.999484	No
UVA_TpB	T>G	UVB_TpN	T>A	0.0415595	-0.0477297	0.130849	0.999567	No
NoUV_TpN	T>G	UVA_TpB	C>G	0.044766	-0.0516774	0.141209	0.999593	No
UVA_TpB	T>C	UVA_TpB	C>A	0.0442209	-0.0522224	0.140664	0.999693	No
UVA_TpB	T>A	UVB_TpN	C>G	0.0408358	-0.0484534	0.130125	0.999711	No
UVA_TpN	T>C	NoUV_TpB	C>T other	-0.0385484	-0.123386	0.0462893	0.999752	No
NoUV_TpB	T>A	UVB_TpN	C>A	0.0385231	-0.0463147	0.123361	0.999756	No
NoUV_TpN	T>A	UVA_TpN	C>T at CpG	-0.0404608	-0.12975	0.0488284	0.999767	No
UVA_TpN	C>T other	NoUV_TpB	C>T	-0.0384361	-0.123274	0.0464017	0.999768	No
NoUV_TpN	C>G	UVA_TpB	C>A	-0.0434655	-0.139909	0.0529779	0.999795	No
NoUV_TpB	T>G	UVA_TpB	C>T at CpG	-0.041472	-0.133809	0.0508655	0.999812	No
UVB_TpN	T>C	UVB_TpN	C>A	0.0362359	-0.0452736	0.117745	0.999853	No
UVB_TpB	T>A	UVA_TpB	C>T at CpG	-0.0410139	-0.133351	0.0513236	0.999856	No
NoUV_TpB	C>T at CpG	NoUV_TpN	C>G	0.0409479	-0.0513896	0.133285	0.999861	No
NoUV_TpB	T>C	NoUV_TpB	C>A	-0.0390262	-0.127067	0.0490141	0.999863	No
UVA_TpB	T>G	UVA_TpN	T>C	-0.039463	-0.128752	0.0498261	0.999872	No
UVB_TpN	T>A	UVB_TpB	C>G	0.0372871	-0.0475506	0.122125	0.999889	No
UVB_TpB	T>G	UVB_TpN	C>T at CpG	-0.0372833	-0.122121	0.0475545	0.999889	No
UVA_TpN	T>C	NoUV_TpB	C>T at CpG	0.0372727	-0.0475651	0.12211	0.99989	No
UVA_TpB	T>G	NoUV_TpN	T>A	0.0421619	-0.0542815	0.138605	0.999902	No
NoUV_TpN	C>T at CpG	UVB_TpN	C>A	0.0388899	-0.0503993	0.128179	0.999911	No
UVB_TpN	C>T at CpG	UVA_TpB	C>A	-0.0387699	-0.128059	0.0505193	0.999918	No
NoUV_TpN	C>G	UVB_TpB	C>G	0.0400892	-0.0522483	0.132427	0.999918	No
NoUV_TpN	T>C	NoUV_TpN	C>T other	-0.0416142	-0.138058	0.0548292	0.99993	No
NoUV_TpN	T>G	UVB_TpN	T>A	0.0384823	-0.0508069	0.127772	0.999932	No
UVB_TpN	C>T at CpG	NoUV_TpB	C>T at CpG	-0.0362522	-0.12109	0.0485855	0.999945	No
UVB_TpB	T>G	UVB_TpB	C>T at CpG	-0.0373462	-0.125387	0.0506941	0.999954	No
UVA_TpB	C>T other	NoUV_TpB	C>T other	0.0391038	-0.0532337	0.131441	0.999956	No
UVA_TpB	C>T at CpG	UVA_TpN	C>G	0.0375711	-0.0517181	0.12686	0.999963	No
UVA_TpB	T>A	UVB_TpB	C>A	0.0387577	-0.0535798	0.131095	0.999965	No
UVB_TpB	T>C	UVA_TpB	C>T at CpG	-0.0387556	-0.131093	0.0535819	0.999965	No
UVB_TpB	C>T at CpG	UVA_TpB	C>A	-0.038707	-0.131044	0.0536305	0.999966	No
UVA_TpN	C>T at CpG	NoUV_TpN	C>G	0.0370564	-0.0522328	0.126346	0.999974	No
UVB_TpN	T>G	UVA_TpB	T>A	-0.036926	-0.126215	0.0523632	0.999977	No
UVB_TpN	C>T at CpG	UVB_TpN	C>G	0.0336974	-0.0478121	0.115207	0.999977	No
UVB_TpB	C>T at CpG	NoUV_TpB	C>T at CpG	-0.0361894	-0.12423	0.051851	0.99998	No
UVA_TpB	C>T at CpG	UVA_TpB	C>G	0.0396029	-0.0568405	0.136046	0.999981	No
NoUV_TpN	T>G	NoUV_TpN	T>A	0.0390847	-0.0573586	0.135528	0.999986	No
UVA_TpB	T>G	NoUV_TpN	C>G	0.0387575	-0.0576859	0.135201	0.999989	No
NoUV_TpB	T>G	NoUV_TpN	C>A	-0.0369628	-0.1293	0.0553747	0.99999	No
UVB_TpB	C>T at CpG	UVB_TpN	C>G	0.0337603	-0.0510775	0.118598	0.999992	No
UVB_TpN	T>A	NoUV_TpB	C>G	0.0337367	-0.0511011	0.118575	0.999992	No
NoUV_TpN	T>A	UVB_TpB	C>G	0.0366848	-0.0556527	0.129022	0.999992	No
UVB_TpN	C>T at CpG	UVA_TpN	C>T at CpG	-0.0323608	-0.11387	0.0491487	0.999992	No
NoUV_TpN	C>G	NoUV_TpB	C>G	0.0365387	-0.0557987	0.128876	0.999993	No
UVB_TpB	T>A	NoUV_TpN	C>A	-0.0365047	-0.128842	0.0558328	0.999993	No
UVA_TpN	C>G	UVB_TpB	C>G	0.0330353	-0.0518025	0.117873	0.999996	No
UVA_TpN	T>C	UVA_TpB	C>A	0.0347551	-0.0545341	0.124044	0.999996	No
UVA_TpN	T>G	NoUV_TpB	T>G	0.0324533	-0.0523845	0.117291	0.999997	No
UVA_TpB	T>G	UVB_TpN	C>T at CpG	0.0340619	-0.0552273	0.123351	0.999997	No
UVA_TpN	C>T at CpG	UVB_TpB	C>T at CpG	0.0322979	-0.0525399	0.117136	0.999998	No
UVA_TpN	T>G	UVB_TpB	T>A	0.0319952	-0.0528426	0.116833	0.999998	No
UVB_TpN	T>A	UVA_TpB	C>T at CpG	-0.0333192	-0.122608	0.05597	0.999999	No
UVB_TpN	C>T at CpG	UVB_TpB	C>A	0.0316193	-0.0532185	0.116457	0.999999	No
UVB_TpB	T>C	NoUV_TpN	C>A	-0.0342464	-0.126584	0.0580911	0.999999	No
UVA_TpN	C>G	NoUV_TpN	C>A	-0.0330619	-0.122351	0.0562273	0.999999	No
NoUV_TpN	T>G	NoUV_TpN	C>G	0.0356803	-0.060763	0.132124	0.999999	No
UVA_TpB	T>G	UVB_TpB	C>T at CpG	0.033999	-0.0583385	0.126336	0.999999	No
UVA_TpN	T>C	NoUV_TpB	T>C	-0.0312187	-0.116057	0.0536191	0.999999	No
UVB_TpN	T>G	UVB_TpN	C>T at CpG	-0.0297876	-0.111297	0.0517219	0.999999	No
UVA_TpB	C>G	NoUV_TpN	C>A	-0.0350936	-0.131537	0.0613497	0.999999	No
UVB_TpB	T>C	UVB_TpB	C>G	0.0318507	-0.0561896	0.119891	0.999999	No
NoUV_TpB	T>G	UVA_TpN	T>A	-0.0306184	-0.115456	0.0542193	1	No
NoUV_TpB	C>T other	NoUV_TpB	C>A	-0.0316965	-0.119737	0.0563439	1	No
UVB_TpB	C>T at CpG	UVB_TpB	C>A	0.0316822	-0.0563582	0.119723	1	No
NoUV_TpN	T>A	NoUV_TpB	C>G	0.0331343	-0.0592031	0.125472	1	No
NoUV_TpN	T>C	UVA_TpB	C>T other	-0.0345373	-0.130981	0.061906	1	No
NoUV_TpB	T>G	UVA_TpN	C>A	-0.0303753	-0.115213	0.0544625	1	No
UVA_TpN	T>A	UVB_TpB	T>A	0.0301603	-0.0546774	0.114998	1	No
UVB_TpB	T>G	NoUV_TpN	C>G	-0.0325877	-0.124925	0.0597497	1	No
UVB_TpB	T>A	UVA_TpN	C>A	-0.0299172	-0.114755	0.0549206	1	No
UVB_TpN	C>T	UVB_TpB	C>T	-0.0299076	-0.114745	0.0549302	1	No
UVB_TpN	T>G	UVB_TpB	C>T at CpG	-0.0298505	-0.114688	0.0549873	1	No
UVB_TpN	C>T other	UVB_TpB	C>T other	-0.0298447	-0.114682	0.0549931	1	No
NoUV_TpN	T>A	UVA_TpB	C>T at CpG	-0.0339216	-0.130365	0.0625217	1	No
UVB_TpB	T>G	UVB_TpN	T>A	-0.0297857	-0.114623	0.0550521	1	No
UVA_TpN	T>G	UVB_TpB	T>C	0.029737	-0.0551008	0.114575	1	No
UVA_TpN	T>G	UVA_TpN	C>G	0.0285525	-0.052957	0.110062	1	No
NoUV_TpN	T>C	UVA_TpB	T>C	0.033649	-0.0627944	0.130092	1	No
UVA_TpN	C>G	NoUV_TpB	C>G	0.0294848	-0.0553529	0.114323	1	No
NoUV_TpN	T>G	UVB_TpN	C>T at CpG	0.0309847	-0.0583045	0.120274	1	No
NoUV_TpB	T>G	NoUV_TpB	T>A	-0.0305475	-0.118588	0.0574928	1	No
UVA_TpB	T>A	UVB_TpN	C>A	0.0307643	-0.0585248	0.120054	1	No
UVA_TpN	T>G	UVA_TpB	C>G	0.0305842	-0.058705	0.119873	1	No
UVB_TpB	T>A	NoUV_TpB	T>A	-0.0300894	-0.11813	0.0579509	1	No
UVB_TpB	T>A	UVB_TpB	C>G	0.0295925	-0.0584478	0.117633	1	No
UVB_TpB	C>G	UVA_TpB	C>G	-0.0310035	-0.123341	0.061334	1	No
NoUV_TpN	T>G	UVB_TpB	C>T at CpG	0.0309218	-0.0614157	0.123259	1	No
NoUV_TpB	T>G	NoUV_TpN	C>T at CpG	-0.0309144	-0.123252	0.0614231	1	No
NoUV_TpB	T>G	UVB_TpN	T>C	-0.0282603	-0.113098	0.0565774	1	No
NoUV_TpB	T>G	UVB_TpB	C>G	0.0291344	-0.0589059	0.117175	1	No
UVB_TpB	T>A	NoUV_TpN	C>T at CpG	-0.0304563	-0.122794	0.0618812	1	No
UVB_TpB	T>C	UVA_TpN	T>A	-0.0279021	-0.11274	0.0569357	1	No
UVA_TpB	T>A	UVA_TpB	C>A	-0.0316314	-0.128075	0.0648119	1	No
UVA_TpN	T>A	UVA_TpN	C>G	0.0267176	-0.0547919	0.108227	1	No
UVB_TpN	T>C	UVB_TpB	T>A	0.0278022	-0.0570355	0.11264	1	No
UVB_TpB	T>C	UVA_TpN	C>A	-0.0276589	-0.112497	0.0571789	1	No
UVA_TpN	C>G	UVA_TpN	C>A	-0.0264744	-0.107984	0.0550351	1	No
UVB_TpN	C>G	NoUV_TpN	C>G	-0.0290018	-0.118291	0.0602874	1	No
UVB_TpN	T>A	NoUV_TpN	C>A	-0.02881	-0.118099	0.0604792	1	No
UVA_TpN	T>A	UVA_TpB	C>G	0.0287493	-0.0605399	0.118039	1	No
UVB_TpB	T>C	NoUV_TpB	C>G	0.0283003	-0.05974	0.116341	1	No
UVB_TpN	T>A	UVB_TpN	C>G	0.0261997	-0.0553098	0.107709	1	No
UVA_TpB	C>G	UVA_TpN	C>A	-0.0285062	-0.117795	0.060783	1	No
UVA_TpB	C>T at CpG	NoUV_TpN	C>G	0.0305172	-0.0659261	0.126961	1	No
UVB_TpB	T>C	NoUV_TpB	T>A	-0.0278312	-0.115872	0.0602092	1	No
UVB_TpB	T>G	NoUV_TpN	T>A	-0.0291833	-0.121521	0.0631542	1	No
NoUV_TpB	T>A	UVA_TpN	C>G	0.0266467	-0.0581911	0.111484	1	No
UVA_TpB	T>A	NoUV_TpB	C>T at CpG	-0.0291138	-0.121451	0.0632237	1	No
UVA_TpB	T>C	NoUV_TpB	C>T other	-0.0290826	-0.12142	0.0632549	1	No
NoUV_TpB	T>A	UVA_TpB	C>G	0.0286784	-0.0636591	0.121016	1	No
UVA_TpB	C>T	NoUV_TpB	C>T	0.0286731	-0.0636644	0.121011	1	No
NoUV_TpN	T>A	NoUV_TpN	C>A	-0.0294124	-0.125856	0.0670309	1	No
NoUV_TpN	C>T at CpG	UVA_TpN	C>G	0.0270135	-0.0622757	0.116303	1	No
UVB_TpB	T>C	NoUV_TpN	C>T at CpG	-0.028198	-0.120535	0.0641395	1	No
NoUV_TpN	T>C	NoUV_TpB	C>A	-0.0271301	-0.119468	0.0652074	1	No
UVB_TpN	T>C	UVA_TpB	C>A	-0.0261599	-0.115449	0.0631293	1	No
UVA_TpB	C>G	NoUV_TpB	C>G	0.0274531	-0.0648844	0.119791	1	No
UVB_TpB	T>A	NoUV_TpB	C>G	0.0260421	-0.0619983	0.114082	1	No
NoUV_TpN	C>T at CpG	UVA_TpB	C>G	0.0290452	-0.0673981	0.125489	1	No
UVB_TpN	T>C	UVA_TpB	C>G	0.0263912	-0.062898	0.11568	1	No
UVB_TpN	T>C	UVA_TpN	C>G	0.0243595	-0.05715	0.105869	1	No
UVB_TpB	T>G	UVA_TpN	C>G	-0.0255338	-0.110372	0.059304	1	No
UVB_TpB	C>T other	UVB_TpN	C>T	-0.0253579	-0.110196	0.0594799	1	No
UVA_TpN	T>G	UVB_TpN	T>A	0.0243006	-0.0572089	0.10581	1	No
UVB_TpN	T>C	UVB_TpB	T>C	0.025544	-0.0592938	0.110382	1	No
UVA_TpB	C>T other	NoUV_TpB	C>A	0.00740729	-0.0849302	0.0997448	1	No
NoUV_TpN	C>T other	NoUV_TpB	C>A	0.0144841	-0.0778533	0.106822	1	No
UVA_TpN	C>T other	NoUV_TpB	C>A	0.0213223	-0.0635155	0.10616	1	No
NoUV_TpB	C>T at CpG	UVA_TpB	C>A	-0.00251761	-0.0948551	0.0898199	1	No
UVA_TpB	C>T at CpG	UVA_TpB	C>A	-0.0129482	-0.109392	0.0834951	1	No
NoUV_TpN	C>T at CpG	UVA_TpB	C>A	-0.0235059	-0.119949	0.0729375	1	No
UVA_TpN	C>T at CpG	UVA_TpB	C>A	-0.00640905	-0.0956982	0.0828801	1	No
NoUV_TpB	T>A	UVA_TpB	C>A	-0.0238727	-0.11621	0.0684648	1	No
UVA_TpN	T>A	UVA_TpB	C>A	-0.0238018	-0.113091	0.0654874	1	No
UVA_TpB	T>G	UVA_TpB	C>A	-0.00470798	-0.101151	0.0917354	1	No
NoUV_TpN	T>G	UVA_TpB	C>A	-0.00778514	-0.104228	0.0886582	1	No
UVA_TpN	T>G	UVA_TpB	C>A	-0.0219669	-0.111256	0.0673223	1	No
UVA_TpN	C>A	UVA_TpB	C>A	-0.0240449	-0.113334	0.0652443	1	No
NoUV_TpB	C>G	UVB_TpB	C>A	-0.00961507	-0.0976554	0.0784253	1	No
UVA_TpB	C>G	UVB_TpB	C>A	0.017838	-0.0744994	0.110176	1	No
UVB_TpB	C>G	UVB_TpB	C>A	-0.0131655	-0.101206	0.0748748	1	No
NoUV_TpN	C>G	UVB_TpB	C>A	0.0269237	-0.0654138	0.119261	1	No
UVA_TpN	C>G	UVB_TpB	C>A	0.0198698	-0.064968	0.104708	1	No
UVB_TpN	C>G	UVB_TpB	C>A	-0.0020781	-0.0869159	0.0827597	1	No
UVB_TpB	T>A	UVB_TpB	C>A	0.016427	-0.0716133	0.104467	1	No
NoUV_TpN	T>A	UVB_TpB	C>A	0.0235193	-0.0688182	0.115857	1	No
UVB_TpN	T>A	UVB_TpB	C>A	0.0241217	-0.0607161	0.108959	1	No
UVB_TpB	T>C	UVB_TpB	C>A	0.0186853	-0.0693551	0.106726	1	No
NoUV_TpB	T>G	UVB_TpB	C>A	0.0159689	-0.0720714	0.104009	1	No
UVB_TpB	T>G	UVB_TpB	C>A	-0.00566406	-0.0937044	0.0823763	1	No
UVB_TpN	T>G	UVB_TpB	C>A	0.00183168	-0.0830061	0.0866695	1	No
NoUV_TpN	C>A	UVA_TpB	C>A	-0.0174575	-0.113901	0.0789859	1	No
UVB_TpN	C>A	UVB_TpB	C>A	0.00799335	-0.0768444	0.0928311	1	No
NoUV_TpN	C>G	NoUV_TpN	C>A	-0.026008	-0.122451	0.0704354	1	No
NoUV_TpB	C>T at CpG	NoUV_TpN	C>A	0.0149399	-0.0773976	0.107277	1	No
UVA_TpB	C>T at CpG	NoUV_TpN	C>A	0.00450922	-0.0919341	0.100953	1	No
UVB_TpB	C>T at CpG	NoUV_TpN	C>A	-0.0212495	-0.113587	0.071088	1	No
NoUV_TpN	C>T at CpG	NoUV_TpN	C>A	-0.00604841	-0.102492	0.0903949	1	No
UVA_TpN	C>T at CpG	NoUV_TpN	C>A	0.0110484	-0.0782408	0.100338	1	No
UVB_TpN	C>T at CpG	NoUV_TpN	C>A	-0.0213124	-0.110602	0.0679768	1	No
NoUV_TpB	T>A	NoUV_TpN	C>A	-0.00641524	-0.0987527	0.0859222	1	No
UVA_TpB	T>A	NoUV_TpN	C>A	-0.014174	-0.110617	0.0822694	1	No
UVA_TpN	T>A	NoUV_TpN	C>A	-0.00634432	-0.0956335	0.0829449	1	No
UVB_TpN	T>C	NoUV_TpN	C>A	-0.00870242	-0.0979916	0.0805868	1	No
UVA_TpB	T>G	NoUV_TpN	C>A	0.0127495	-0.0836939	0.109193	1	No
NoUV_TpN	T>G	NoUV_TpN	C>A	0.00967232	-0.086771	0.106116	1	No
UVA_TpN	T>G	NoUV_TpN	C>A	-0.00450944	-0.0937986	0.0847798	1	No
UVA_TpN	C>A	NoUV_TpN	C>A	-0.00658748	-0.0958767	0.0827017	1	No
NoUV_TpN	C>G	UVA_TpN	C>A	-0.0194205	-0.10871	0.0698687	1	No
NoUV_TpB	C>T at CpG	UVA_TpN	C>A	0.0215273	-0.0633105	0.106365	1	No
UVA_TpB	C>T at CpG	UVA_TpN	C>A	0.0110967	-0.0781925	0.100386	1	No
UVB_TpB	C>T at CpG	UVA_TpN	C>A	-0.014662	-0.0994998	0.0701758	1	No
NoUV_TpN	C>T at CpG	UVA_TpN	C>A	0.000539065	-0.0887501	0.0898283	1	No
UVA_TpN	C>T at CpG	UVA_TpN	C>A	0.0176359	-0.0638736	0.0991454	1	No
UVB_TpN	C>T at CpG	UVA_TpN	C>A	-0.0147249	-0.0962344	0.0667846	1	No
NoUV_TpB	T>A	UVA_TpN	C>A	0.00017224	-0.0846655	0.08501	1	No
UVA_TpB	T>A	UVA_TpN	C>A	-0.0075865	-0.0968757	0.0817027	1	No
NoUV_TpN	T>A	UVA_TpN	C>A	-0.0228249	-0.112114	0.0664643	1	No
UVA_TpN	T>A	UVA_TpN	C>A	0.00024316	-0.0812663	0.0817527	1	No
UVB_TpN	T>A	UVA_TpN	C>A	-0.0222225	-0.103732	0.059287	1	No
UVB_TpN	T>C	UVA_TpN	C>A	-0.00211495	-0.0836245	0.0793946	1	No
UVA_TpB	T>G	UVA_TpN	C>A	0.019337	-0.0699522	0.108626	1	No
NoUV_TpN	T>G	UVA_TpN	C>A	0.0162598	-0.0730294	0.105549	1	No
UVA_TpN	T>G	UVA_TpN	C>A	0.00207804	-0.0794315	0.0835875	1	No
NoUV_TpB	C>G	UVB_TpN	C>A	-0.0176084	-0.102446	0.0672294	1	No
UVA_TpB	C>G	UVB_TpN	C>A	0.00984468	-0.0794445	0.0991339	1	No
UVB_TpB	C>G	UVB_TpN	C>A	-0.0211588	-0.105997	0.0636789	1	No
NoUV_TpN	C>G	UVB_TpN	C>A	0.0189303	-0.0703589	0.10822	1	No
UVA_TpN	C>G	UVB_TpN	C>A	0.0118764	-0.0696331	0.0933859	1	No
UVB_TpN	C>G	UVB_TpN	C>A	-0.0100714	-0.091581	0.0714381	1	No
UVB_TpB	C>T at CpG	UVB_TpN	C>A	0.0236888	-0.061149	0.108527	1	No
UVB_TpN	C>T at CpG	UVB_TpN	C>A	0.0236259	-0.0578836	0.105135	1	No
UVB_TpB	T>A	UVB_TpN	C>A	0.00843365	-0.0764041	0.0932714	1	No
NoUV_TpN	T>A	UVB_TpN	C>A	0.0155259	-0.0737633	0.104815	1	No
UVB_TpN	T>A	UVB_TpN	C>A	0.0161283	-0.0653812	0.0976378	1	No
UVB_TpB	T>C	UVB_TpN	C>A	0.0106919	-0.0741459	0.0955297	1	No
NoUV_TpB	T>G	UVB_TpN	C>A	0.00797555	-0.0768622	0.0928133	1	No
UVB_TpB	T>G	UVB_TpN	C>A	-0.0136574	-0.0984952	0.0711804	1	No
UVB_TpN	T>G	UVB_TpN	C>A	-0.00616167	-0.0876712	0.0753478	1	No
UVB_TpB	C>G	NoUV_TpB	C>G	-0.00355042	-0.0915908	0.0844899	1	No
UVB_TpN	C>G	NoUV_TpB	C>G	0.00753697	-0.0773008	0.0923748	1	No
NoUV_TpB	T>G	NoUV_TpB	C>G	0.025584	-0.0624564	0.113624	1	No
UVB_TpB	T>G	NoUV_TpB	C>G	0.00395101	-0.0840893	0.0919913	1	No
UVB_TpN	T>G	NoUV_TpB	C>G	0.0114468	-0.073391	0.0962845	1	No
NoUV_TpN	C>G	UVA_TpB	C>G	0.00908564	-0.0873577	0.105529	1	No
UVA_TpN	C>G	UVA_TpB	C>G	0.00203174	-0.0872575	0.0913209	1	No
UVB_TpN	C>G	UVA_TpB	C>G	-0.0199161	-0.109205	0.0693731	1	No
UVB_TpB	C>T at CpG	UVA_TpB	C>G	0.0138441	-0.0784933	0.106182	1	No
UVB_TpN	C>T at CpG	UVA_TpB	C>G	0.0137812	-0.075508	0.10307	1	No
UVA_TpB	T>A	UVA_TpB	C>G	0.0209197	-0.0755237	0.117363	1	No
UVB_TpB	T>A	UVA_TpB	C>G	-0.00141103	-0.0937485	0.0909265	1	No
NoUV_TpN	T>A	UVA_TpB	C>G	0.00568123	-0.0907621	0.102125	1	No
UVB_TpN	T>A	UVA_TpB	C>G	0.00628362	-0.0830056	0.0955728	1	No
UVB_TpB	T>C	UVA_TpB	C>G	0.000847224	-0.0914903	0.0931847	1	No
NoUV_TpB	T>G	UVA_TpB	C>G	-0.00186913	-0.0942066	0.0904684	1	No
UVB_TpB	T>G	UVA_TpB	C>G	-0.0235021	-0.11584	0.0688354	1	No
UVB_TpN	T>G	UVA_TpB	C>G	-0.0160064	-0.105296	0.0732828	1	No
UVB_TpN	C>G	UVB_TpB	C>G	0.0110874	-0.0737504	0.0959252	1	No
UVB_TpB	T>G	UVB_TpB	C>G	0.00750143	-0.0805389	0.0955418	1	No
UVB_TpN	T>G	UVB_TpB	C>G	0.0149972	-0.0698406	0.099835	1	No
UVA_TpN	C>G	NoUV_TpN	C>G	-0.0070539	-0.0963431	0.0822353	1	No
UVB_TpB	C>T at CpG	NoUV_TpN	C>G	0.0047585	-0.087579	0.097096	1	No
NoUV_TpN	C>T at CpG	NoUV_TpN	C>G	0.0199596	-0.0764838	0.116403	1	No
UVB_TpN	C>T at CpG	NoUV_TpN	C>G	0.0046956	-0.0845936	0.0939848	1	No
NoUV_TpB	T>A	NoUV_TpN	C>G	0.0195928	-0.0727447	0.11193	1	No
UVA_TpB	T>A	NoUV_TpN	C>G	0.011834	-0.0846093	0.108277	1	No
UVB_TpB	T>A	NoUV_TpN	C>G	-0.0104967	-0.102834	0.0818408	1	No
NoUV_TpN	T>A	NoUV_TpN	C>G	-0.00340441	-0.0998478	0.0930389	1	No
UVA_TpN	T>A	NoUV_TpN	C>G	0.0196637	-0.0696255	0.108953	1	No
UVB_TpN	T>A	NoUV_TpN	C>G	-0.00280202	-0.0920912	0.0864872	1	No
UVB_TpB	T>C	NoUV_TpN	C>G	-0.00823842	-0.100576	0.0840991	1	No
UVB_TpN	T>C	NoUV_TpN	C>G	0.0173056	-0.0719836	0.106595	1	No
NoUV_TpB	T>G	NoUV_TpN	C>G	-0.0109548	-0.103292	0.0813827	1	No
UVA_TpN	T>G	NoUV_TpN	C>G	0.0214986	-0.0677906	0.110788	1	No
UVB_TpN	T>G	NoUV_TpN	C>G	-0.025092	-0.114381	0.0641972	1	No
UVB_TpN	C>G	UVA_TpN	C>G	-0.0219479	-0.103457	0.0595616	1	No
UVB_TpB	C>T at CpG	UVA_TpN	C>G	0.0118124	-0.0730254	0.0966502	1	No
UVB_TpN	C>T at CpG	UVA_TpN	C>G	0.0117495	-0.06976	0.093259	1	No
UVA_TpB	T>A	UVA_TpN	C>G	0.0188879	-0.0704013	0.108177	1	No
UVB_TpB	T>A	UVA_TpN	C>G	-0.00344276	-0.0882806	0.081395	1	No
NoUV_TpN	T>A	UVA_TpN	C>G	0.00364949	-0.0856397	0.0929387	1	No
UVB_TpN	T>A	UVA_TpN	C>G	0.00425188	-0.0772576	0.0857614	1	No
UVB_TpB	T>C	UVA_TpN	C>G	-0.00118451	-0.0860223	0.0836533	1	No
NoUV_TpB	T>G	UVA_TpN	C>G	-0.00390087	-0.0887387	0.0809369	1	No
UVB_TpN	T>G	UVA_TpN	C>G	-0.0180381	-0.0995476	0.0634714	1	No
UVB_TpB	T>A	UVB_TpN	C>G	0.0185051	-0.0663327	0.103343	1	No
NoUV_TpN	T>A	UVB_TpN	C>G	0.0255974	-0.0636918	0.114887	1	No
UVB_TpB	T>C	UVB_TpN	C>G	0.0207634	-0.0640744	0.105601	1	No
NoUV_TpB	T>G	UVB_TpN	C>G	0.018047	-0.0667908	0.102885	1	No
UVB_TpB	T>G	UVB_TpN	C>G	-0.00358596	-0.0884238	0.0812518	1	No
UVB_TpN	T>G	UVB_TpN	C>G	0.00390978	-0.0775997	0.0854193	1	No
NoUV_TpN	C>T	NoUV_TpB	C>T	0.0251923	-0.0671452	0.11753	1	No
NoUV_TpN	C>T	UVA_TpB	C>T	-0.00348079	-0.0999241	0.0929626	1	No
UVA_TpN	C>T	UVA_TpB	C>T	0.0204542	-0.068835	0.109743	1	No
UVA_TpN	C>T	NoUV_TpN	C>T	0.0239349	-0.0653542	0.113224	1	No
UVA_TpB	C>T at CpG	NoUV_TpB	C>T at CpG	-0.0104306	-0.102768	0.0819068	1	No
NoUV_TpN	C>T at CpG	NoUV_TpB	C>T at CpG	-0.0209883	-0.113326	0.0713492	1	No
UVA_TpN	C>T at CpG	NoUV_TpB	C>T at CpG	-0.00389144	-0.0887292	0.0809463	1	No
NoUV_TpB	T>A	NoUV_TpB	C>T at CpG	-0.0213551	-0.109395	0.0666852	1	No
UVA_TpN	T>A	NoUV_TpB	C>T at CpG	-0.0212842	-0.106122	0.0635536	1	No
UVB_TpN	T>C	NoUV_TpB	C>T at CpG	-0.0236423	-0.10848	0.0611955	1	No
UVA_TpB	T>G	NoUV_TpB	C>T at CpG	-0.00219038	-0.0945279	0.0901471	1	No
NoUV_TpN	T>G	NoUV_TpB	C>T at CpG	-0.00526754	-0.097605	0.0870699	1	No
UVA_TpN	T>G	NoUV_TpB	C>T at CpG	-0.0194493	-0.104287	0.0653885	1	No
UVB_TpB	C>T at CpG	UVA_TpB	C>T at CpG	-0.0257587	-0.118096	0.0665788	1	No
NoUV_TpN	C>T at CpG	UVA_TpB	C>T at CpG	-0.0105576	-0.107001	0.0858857	1	No
UVA_TpN	C>T at CpG	UVA_TpB	C>T at CpG	0.0065392	-0.08275	0.0958284	1	No
UVB_TpN	C>T at CpG	UVA_TpB	C>T at CpG	-0.0258216	-0.115111	0.0634676	1	No
NoUV_TpB	T>A	UVA_TpB	C>T at CpG	-0.0109245	-0.103262	0.081413	1	No
UVA_TpB	T>A	UVA_TpB	C>T at CpG	-0.0186832	-0.115127	0.0777602	1	No
UVA_TpN	T>A	UVA_TpB	C>T at CpG	-0.0108535	-0.100143	0.0784357	1	No
UVB_TpN	T>C	UVA_TpB	C>T at CpG	-0.0132116	-0.102501	0.0760776	1	No
UVA_TpB	T>G	UVA_TpB	C>T at CpG	0.00824026	-0.0882031	0.104684	1	No
NoUV_TpN	T>G	UVA_TpB	C>T at CpG	0.0051631	-0.0912802	0.101606	1	No
UVA_TpN	T>G	UVA_TpB	C>T at CpG	-0.00901866	-0.0983078	0.0802705	1	No
NoUV_TpN	C>T at CpG	UVB_TpB	C>T at CpG	0.0152011	-0.0771364	0.107539	1	No
UVB_TpN	C>T at CpG	UVB_TpB	C>T at CpG	-6.29e-05	-0.0849007	0.0847749	1	No
NoUV_TpB	T>A	UVB_TpB	C>T at CpG	0.0148343	-0.0732061	0.102875	1	No
UVA_TpB	T>A	UVB_TpB	C>T at CpG	0.00707552	-0.085262	0.099413	1	No
UVB_TpB	T>A	UVB_TpB	C>T at CpG	-0.0152552	-0.103295	0.0727852	1	No
NoUV_TpN	T>A	UVB_TpB	C>T at CpG	-0.00816291	-0.1005	0.0841746	1	No
UVA_TpN	T>A	UVB_TpB	C>T at CpG	0.0149052	-0.0699326	0.099743	1	No
UVB_TpN	T>A	UVB_TpB	C>T at CpG	-0.00756052	-0.0923983	0.0772773	1	No
UVB_TpB	T>C	UVB_TpB	C>T at CpG	-0.0129969	-0.101037	0.0750434	1	No
UVB_TpN	T>C	UVB_TpB	C>T at CpG	0.0125471	-0.0722907	0.0973849	1	No
NoUV_TpB	T>G	UVB_TpB	C>T at CpG	-0.0157133	-0.103754	0.0723271	1	No
UVA_TpN	T>G	UVB_TpB	C>T at CpG	0.0167401	-0.0680977	0.101578	1	No
UVA_TpN	C>T at CpG	NoUV_TpN	C>T at CpG	0.0170968	-0.0721924	0.106386	1	No
UVB_TpN	C>T at CpG	NoUV_TpN	C>T at CpG	-0.015264	-0.104553	0.0740252	1	No
NoUV_TpB	T>A	NoUV_TpN	C>T at CpG	-0.000366825	-0.0927043	0.0919707	1	No
UVA_TpB	T>A	NoUV_TpN	C>T at CpG	-0.00812556	-0.104569	0.0883178	1	No
NoUV_TpN	T>A	NoUV_TpN	C>T at CpG	-0.023364	-0.119807	0.0730794	1	No
UVA_TpN	T>A	NoUV_TpN	C>T at CpG	-0.000295904	-0.0895851	0.0889933	1	No
UVB_TpN	T>A	NoUV_TpN	C>T at CpG	-0.0227616	-0.112051	0.0665276	1	No
UVB_TpN	T>C	NoUV_TpN	C>T at CpG	-0.00265401	-0.0919432	0.0866352	1	No
UVA_TpB	T>G	NoUV_TpN	C>T at CpG	0.0187979	-0.0776455	0.115241	1	No
NoUV_TpN	T>G	NoUV_TpN	C>T at CpG	0.0157207	-0.0807226	0.112164	1	No
UVA_TpN	T>G	NoUV_TpN	C>T at CpG	0.00153897	-0.0877502	0.0908282	1	No
NoUV_TpB	T>A	UVA_TpN	C>T at CpG	-0.0174637	-0.102301	0.0673741	1	No
UVA_TpB	T>A	UVA_TpN	C>T at CpG	-0.0252224	-0.114512	0.0640668	1	No
UVA_TpN	T>A	UVA_TpN	C>T at CpG	-0.0173927	-0.0989022	0.0641168	1	No
UVB_TpN	T>C	UVA_TpN	C>T at CpG	-0.0197508	-0.10126	0.0617587	1	No
UVA_TpB	T>G	UVA_TpN	C>T at CpG	0.00170107	-0.0875881	0.0909903	1	No
NoUV_TpN	T>G	UVA_TpN	C>T at CpG	-0.00137609	-0.0906653	0.0879131	1	No
UVA_TpN	T>G	UVA_TpN	C>T at CpG	-0.0155579	-0.0970674	0.0659517	1	No
NoUV_TpB	T>A	UVB_TpN	C>T at CpG	0.0148972	-0.0699406	0.0997349	1	No
UVA_TpB	T>A	UVB_TpN	C>T at CpG	0.00713842	-0.0821508	0.0964276	1	No
UVB_TpB	T>A	UVB_TpN	C>T at CpG	-0.0151923	-0.10003	0.0696455	1	No
NoUV_TpN	T>A	UVB_TpN	C>T at CpG	-0.00810001	-0.0973892	0.0811892	1	No
UVA_TpN	T>A	UVB_TpN	C>T at CpG	0.0149681	-0.0665414	0.0964776	1	No
UVB_TpN	T>A	UVB_TpN	C>T at CpG	-0.00749762	-0.0890071	0.0740119	1	No
UVB_TpB	T>C	UVB_TpN	C>T at CpG	-0.012934	-0.0977718	0.0719038	1	No
UVB_TpN	T>C	UVB_TpN	C>T at CpG	0.01261	-0.0688995	0.0941195	1	No
NoUV_TpB	T>G	UVB_TpN	C>T at CpG	-0.0156504	-0.100488	0.0691874	1	No
UVA_TpN	T>G	UVB_TpN	C>T at CpG	0.016803	-0.0647066	0.0983125	1	No
NoUV_TpB	T>C	NoUV_TpB	C>T other	-0.00732972	-0.0953701	0.0807106	1	No
NoUV_TpN	T>C	NoUV_TpB	C>T other	0.0045664	-0.0877711	0.0969039	1	No
NoUV_TpN	C>T other	UVA_TpB	C>T other	0.00707684	-0.0893665	0.10352	1	No
UVA_TpN	C>T other	UVA_TpB	C>T other	0.013915	-0.0753742	0.103204	1	No
UVA_TpN	C>T other	NoUV_TpN	C>T other	0.00683812	-0.0824511	0.0961273	1	No
UVA_TpB	T>A	NoUV_TpB	T>A	-0.00775874	-0.100096	0.0845787	1	No
NoUV_TpN	T>A	NoUV_TpB	T>A	-0.0229972	-0.115335	0.0693403	1	No
UVA_TpN	T>A	NoUV_TpB	T>A	7.09e-05	-0.0847669	0.0849087	1	No
UVB_TpN	T>A	NoUV_TpB	T>A	-0.0223948	-0.107233	0.062443	1	No
UVB_TpN	T>C	NoUV_TpB	T>A	-0.00228719	-0.087125	0.0825506	1	No
UVA_TpB	T>G	NoUV_TpB	T>A	0.0191647	-0.0731728	0.111502	1	No
NoUV_TpN	T>G	NoUV_TpB	T>A	0.0160876	-0.0762499	0.108425	1	No
UVA_TpN	T>G	NoUV_TpB	T>A	0.0019058	-0.082932	0.0867436	1	No
UVB_TpB	T>A	UVA_TpB	T>A	-0.0223307	-0.114668	0.0700068	1	No
NoUV_TpN	T>A	UVA_TpB	T>A	-0.0152384	-0.111682	0.0812049	1	No
UVA_TpN	T>A	UVA_TpB	T>A	0.00782966	-0.0814595	0.0971189	1	No
UVB_TpN	T>A	UVA_TpB	T>A	-0.014636	-0.103925	0.0746532	1	No
UVB_TpB	T>C	UVA_TpB	T>A	-0.0200724	-0.11241	0.072265	1	No
UVB_TpN	T>C	UVA_TpB	T>A	0.00547155	-0.0838176	0.0947607	1	No
NoUV_TpB	T>G	UVA_TpB	T>A	-0.0227888	-0.115126	0.0695487	1	No
UVA_TpB	T>G	UVA_TpB	T>A	0.0269235	-0.0695199	0.123367	1	No
NoUV_TpN	T>G	UVA_TpB	T>A	0.0238463	-0.0725971	0.12029	1	No
UVA_TpN	T>G	UVA_TpB	T>A	0.00966453	-0.0796247	0.0989537	1	No
NoUV_TpN	T>A	UVB_TpB	T>A	0.00709226	-0.0852452	0.0994297	1	No
UVB_TpN	T>A	UVB_TpB	T>A	0.00769465	-0.0771431	0.0925324	1	No
UVB_TpB	T>C	UVB_TpB	T>A	0.00225825	-0.0857821	0.0902986	1	No
NoUV_TpB	T>G	UVB_TpB	T>A	-0.000458102	-0.0884984	0.0875822	1	No
UVB_TpB	T>G	UVB_TpB	T>A	-0.0220911	-0.110131	0.0659493	1	No
UVB_TpN	T>G	UVB_TpB	T>A	-0.0145953	-0.0994331	0.0702425	1	No
UVA_TpN	T>A	NoUV_TpN	T>A	0.0230681	-0.0662211	0.112357	1	No
UVB_TpN	T>A	NoUV_TpN	T>A	0.000602389	-0.0886868	0.0898916	1	No
UVB_TpB	T>C	NoUV_TpN	T>A	-0.00483401	-0.0971715	0.0875035	1	No
UVB_TpN	T>C	NoUV_TpN	T>A	0.02071	-0.0685792	0.109999	1	No
NoUV_TpB	T>G	NoUV_TpN	T>A	-0.00755036	-0.0998878	0.0847871	1	No
UVA_TpN	T>G	NoUV_TpN	T>A	0.024903	-0.0643862	0.114192	1	No
UVB_TpN	T>G	NoUV_TpN	T>A	-0.0216876	-0.110977	0.0676016	1	No
UVB_TpN	T>A	UVA_TpN	T>A	-0.0224657	-0.103975	0.0590438	1	No
UVB_TpN	T>C	UVA_TpN	T>A	-0.00235811	-0.0838676	0.0791514	1	No
UVA_TpB	T>G	UVA_TpN	T>A	0.0190938	-0.0701954	0.108383	1	No
NoUV_TpN	T>G	UVA_TpN	T>A	0.0160166	-0.0732726	0.105306	1	No
UVA_TpN	T>G	UVA_TpN	T>A	0.00183488	-0.0796746	0.0833444	1	No
UVB_TpB	T>C	UVB_TpN	T>A	-0.0054364	-0.0902742	0.0794014	1	No
UVB_TpN	T>C	UVB_TpN	T>A	0.0201076	-0.0614019	0.101617	1	No
NoUV_TpB	T>G	UVB_TpN	T>A	-0.00815275	-0.0929905	0.076685	1	No
UVB_TpN	T>G	UVB_TpN	T>A	-0.02229	-0.103799	0.0592195	1	No
NoUV_TpB	T>G	UVB_TpB	T>C	-0.00271635	-0.0907567	0.085324	1	No
UVB_TpB	T>G	UVB_TpB	T>C	-0.0243493	-0.11239	0.063691	1	No
UVB_TpN	T>G	UVB_TpB	T>C	-0.0168536	-0.101691	0.0679842	1	No
UVA_TpB	T>C	NoUV_TpB	T>C	-0.0217529	-0.11409	0.0705846	1	No
NoUV_TpN	T>C	NoUV_TpB	T>C	0.0118961	-0.0804414	0.104234	1	No
UVA_TpN	T>C	UVA_TpB	T>C	-0.00946585	-0.098755	0.0798233	1	No
UVA_TpB	T>G	UVB_TpN	T>C	0.0214519	-0.0678373	0.110741	1	No
NoUV_TpN	T>G	UVB_TpN	T>C	0.0183747	-0.0709144	0.107664	1	No
UVA_TpN	T>G	UVB_TpN	T>C	0.00419299	-0.0773165	0.0857025	1	No
UVB_TpB	T>G	NoUV_TpB	T>G	-0.021633	-0.109673	0.0664074	1	No
UVB_TpN	T>G	NoUV_TpB	T>G	-0.0141372	-0.098975	0.0707006	1	No
NoUV_TpN	T>G	UVA_TpB	T>G	-0.00307716	-0.0995205	0.0933662	1	No
UVA_TpN	T>G	UVA_TpB	T>G	-0.0172589	-0.106548	0.0720303	1	No
UVB_TpN	T>G	UVB_TpB	T>G	0.00749574	-0.077342	0.0923335	1	No
UVA_TpN	T>G	NoUV_TpN	T>G	-0.0141818	-0.103471	0.0751074	1	No
