# Supplementary material for: UVB mutagenesis differs in Nras- and Braf-mutant mouse models of melanoma
Source: Life Sci Alliance. 2021 Jul 1;4(9):e202101135. doi: 10.26508/lsa.202101135 (PMC8321651; doi:10.26508/lsa.202101135)
Supplement: Supplementary file 5 [file LSA-2021-01135_TableS5.xlsx]

## Sheet: Suppl. Table 2D
Group	Type	Transcribed	Untranscribed	Total	Ratio	p_poisson	significant		Table S5: p values associated with Figure 4D
TpN_NoUV	C>A	5	8	13	0.625	0.581055			For each mutation type, a poisson test was performed to evaluate the statistical significance of the ratio of mutations found on the transcribed and unstracribed strand within the different genotype/UV dosing groups. Mutation prevalence and poisson test were performed with the "strand_bias_test" function from the MutationalPatterns package in R. * = p<0.05
TpN_NoUV	C>G	3	2	5	1.5	1
TpN_NoUV	C>T	18	20	38	0.9	0.871415
TpN_NoUV	T>A	3	4	7	0.75	1
TpN_NoUV	T>C	13	9	22	1.44444	0.523467
TpN_NoUV	T>G	4	5	9	0.8	1
TpN_UVA	C>A	7	14	21	0.5	0.189247
TpN_UVA	C>G	9	2	11	4.5	0.0654297
TpN_UVA	C>T	37	39	76	0.948718	0.908777
TpN_UVA	T>A	13	9	22	1.44444	0.523467
TpN_UVA	T>C	19	17	36	1.11765	0.867939
TpN_UVA	T>G	8	9	17	0.888889	1
TpN_UVB	C>A	47	60	107	0.783333	0.245891
TpN_UVB	C>G	38	37	75	1.02703	1
TpN_UVB	C>T	426	707	1133	0.602546	6.21e-17	*
TpN_UVB	T>A	76	57	133	1.33333	0.11824
TpN_UVB	T>C	106	128	234	0.828125	0.169676
TpN_UVB	T>G	38	36	74	1.05556	0.907561
TpB_NoUV	C>A	16	12	28	1.33333	0.571588
TpB_NoUV	C>G	1	1	2	1	1
TpB_NoUV	C>T	21	15	36	1.4	0.405032
TpB_NoUV	T>A	3	4	7	0.75	1
TpB_NoUV	T>C	10	16	26	0.625	0.32694
TpB_NoUV	T>G	1	3	4	0.333333	0.625
TpB_UVA	C>A	15	8	23	1.875	0.21004
TpB_UVA	C>G	0	2	2	0	0.5
TpB_UVA	C>T	32	37	69	0.864865	0.630456
TpB_UVA	T>A	8	8	16	1	1
TpB_UVA	T>C	8	21	29	0.380952	0.0241195	*
TpB_UVA	T>G	9	5	14	1.8	0.42395
TpB_UVB	C>A	80	117	197	0.683761	0.01014	*
TpB_UVB	C>G	50	68	118	0.735294	0.117213
TpB_UVB	C>T	1284	2455	3739	0.523014	5.85e-83	*
TpB_UVB	T>A	126	228	354	0.552632	6.51e-08	*
TpB_UVB	T>C	122	193	315	0.632124	7.51e-05	*
TpB_UVB	T>G	61	102	163	0.598039	0.00164687	*
