# Supplementary material for: UVB mutagenesis differs in Nras- and Braf-mutant mouse models of melanoma
Source: Life Sci Alliance. 2021 Jul 1;4(9):e202101135. doi: 10.26508/lsa.202101135 (PMC8321651; doi:10.26508/lsa.202101135)
Supplement: Supplementary file 9 [file LSA-2021-01135_TableS9.xlsx]

## Sheet: Sheet1
Group 1	Group 2	Signature	FDR p value		Table S9: p values associated with Figure 6C
TpN_UVA	TpN_NoUV	Signature 1	0.06313		Signature contributions were assessed for the two signatures identified SignatureProfiler. Significant differences were evaluated using a Mann–Whitney U test and Benjamini Hochberg adjusted p values were generated for each signature and and tumor type (TN or TB) pairing.
TpN_UVB	TpN_NoUV	Signature 1	0.0157152
TpN_UVB	TpN_UVA	Signature 1	0.0157152
TpN_UVA	TpN_NoUV	Signature 2	0.449737
TpN_UVB	TpN_NoUV	Signature 2	0.449737
TpN_UVB	TpN_UVA	Signature 2	0.449737
TpB_UVA	TpB_NoUV	Signature 1	0.00541806
TpB_UVB	TpB_NoUV	Signature 1	0.0128244
TpB_UVB	TpB_UVA	Signature 1	0.0128244
TpB_UVA	TpB_NoUV	Signature 2	0.0598142
TpB_UVB	TpB_NoUV	Signature 2	0.0332012
TpB_UVB	TpB_UVA	Signature 2	0.00811905
TpB_UVB	TpN_UVB	Signature 1	0.0321664
TpB_UVB	TpN_UVB	Signature 2	0.355918
