# Supplementary material for: UVB mutagenesis differs in Nras- and Braf-mutant mouse models of melanoma
Source: Life Sci Alliance. 2021 Jul 1;4(9):e202101135. doi: 10.26508/lsa.202101135 (PMC8321651; doi:10.26508/lsa.202101135)
Supplement: Supplementary file 10 [file LSA-2021-01135_TableS10.xlsx]

## Sheet: Sheet1
COSMIC Signature	Signature 1		Signature 2			Table S10: p values associated with Figure 6D
	Cosine Similarity	p-value	Cosine Similarity	p-value		Relationship between SigProfiler mutational signatures identified in our dataset (Signature 1, Signature 2) and single base substitution (SBS) patterns in the COSMIC database. P-values were empirically generated through a permutation test as described in the methods.
SBS1	0.0922594	0.491412	0.401234	0.000582
SBS2	0.682877	0.000292	0.194292	0.369734
SBS3	0.375334	0.18648	0.703584	0.75143
SBS4	0.154864	0.791904	0.388572	0.356558
SBS5	0.531903	0.000658	0.879034	9.99999e-07
SBS6	0.146317	0.386116	0.511191	9.99999e-07
SBS7a	0.809133	9.99999e-07	0.19099	0.932352
SBS7b	0.770595	4e-06	0.202332	0.578462
SBS7c	0.247202	0.149402	0.271325	0.474666
SBS7d	0.182005	0.18915	0.315213	0.235688
SBS8	0.165643	0.45286	0.497547	0.707926
SBS9	0.267861	0.728942	0.628303	0.291364
SBS10a	0.0567759	0.422148	0.141198	0.63004
SBS10b	0.368079	0.065532	0.160417	0.495008
SBS11	0.624162	0.000148	0.339839	0.116634
SBS12	0.116567	0.604642	0.560479	0.003054
SBS13	0.0384836	0.897166	0.174125	0.915574
SBS14	0.0808749	0.900708	0.266557	0.596744
SBS15	0.0871784	0.462274	0.397336	0.000178
SBS16	0.191662	0.386846	0.49594	0.030178
SBS17a	0.112218	0.373322	0.186942	0.748676
SBS17b	0.0420998	0.720458	0.114099	0.799194
SBS18	0.160241	0.905288	0.475656	0.126566
SBS19	0.65574	0.000264	0.337839	0.14041
SBS20	0.145048	0.471688	0.368217	0.16166
SBS21	0.0508372	0.29352	0.399735	0.056772
SBS22	0.0520596	0.323524	0.217948	0.209924
SBS23	0.490832	0.00547	0.395416	0.016842
SBS24	0.0973426	0.522376	0.411802	0.28756
SBS25	0.310451	0.34779	0.701742	0.010752
SBS26	0.10338	0.54219	0.561126	0.001352
SBS27	0.132743	0.44612	0.259893	0.869496
SBS28	0.0575514	0.856418	0.177003	0.95826
SBS29	0.0946085	0.383058	0.455769	0.195768
SBS30	0.676716	2.4e-05	0.439885	0.017094
SBS31	0.541814	0.00489	0.288018	0.732316
SBS32	0.488921	0.006284	0.574519	0.00021
SBS33	0.0659623	0.957284	0.316665	0.140692
SBS34	0.0559935	0.876016	0.204882	0.945064
SBS35	0.316791	0.149406	0.339032	0.156192
SBS36	0.116222	0.892644	0.336394	0.577256
SBS37	0.16542	0.493564	0.6195	0.022386
SBS38	0.0683826	0.717882	0.17285	0.735178
SBS39	0.16767	0.079492	0.530658	0.14156
SBS40	0.549595	9.99999e-07	0.752767	0.051082
SBS41	0.251057	0.579776	0.569006	0.131934
SBS42	0.314632	0.108344	0.53354	0.00099
SBS43	0.0230373	0.004268	0.215321	0.280848
SBS44	0.13806	0.880086	0.640149	2e-06
SBS45	0.0573858	0.893966	0.182024	0.404398
SBS46	0.234899	0.456406	0.57749	0.003974
SBS47	0.373689	0.04766	0.316612	0.501332
SBS48	0.00301184	0.14371	0.0713212	0.544404
SBS49	0.0102923	0.479066	0.053495	0.153054
SBS50	0.459679	0.012106	0.362468	0.648306
SBS51	0.202701	0.537452	0.480516	0.114738
SBS52	0.0322385	0.520072	0.183814	0.91326
SBS53	0.0810762	0.850754	0.227963	0.905278
SBS54	0.0542894	0.417522	0.453255	0.004222
SBS55	0.0759261	0.825672	0.18542	0.506806
SBS56	0.0439941	0.91882	0.187901	0.796606
SBS57	0.391845	0.077844	0.502566	0.1101
SBS58	0.614758	0.001734	0.422024	0.332548
SBS59	0.0149876	0.092896	0.178222	0.534004
SBS60	0.0152712	0.50588	0.0685445	0.314138
