# Supplementary material for: UVB mutagenesis differs in Nras- and Braf-mutant mouse models of melanoma
Source: Life Sci Alliance. 2021 Jul 1;4(9):e202101135. doi: 10.26508/lsa.202101135 (PMC8321651; doi:10.26508/lsa.202101135)
Supplement: Supplementary file 11 [file LSA-2021-01135_TableS11.xlsx]

## Sheet: Sheet1
Table S11
WES quality, mapping and coverage metrics by sample. PCT_BASEQ indicates the percentage of bases with a read quality score greater or equal to the number which follows each heading
Sample_Name	Mouse_Genotype	Treatment_Group	Total_Reads	Unique_Reads	PCT_EXC_MAPQ	PCT_EXC_BASEQ	Mean_Read_Depth	Median_Read Depth	PCT_BASEQ≥20	PCT_BASEQ≥25	PCT_BASEQ≥30	PCT_BASEQ≥35	VarScan Variants	StrelkaVariants	MutectVariants	Varscan2|Mutect2	Varscan2|Strelka2	Mutect2|Strelka2	Varscan2|Mutect2|Strelka2	3_Callers_Minus dbSNP	NUM_DiPyr
BPS2T	TpB	No_UV	122717114	98822255	0.0988	0.004289	73.8427	63	98.0198	96.7354	93.9842	72.967	140	85643	6739	70	638	2510	2666	72	0
BPS4T	TpB	No_UV	153707192	119306938	0.099804	0.003668	83.2552	69	98.1524	96.9206	93.8629	57.5011	100	96702	6235	26	371	1507	854	26	0
BPS8T	TpB	No_UV	135361324	110614892	0.095821	0.004465	82.5114	71	97.9657	96.6486	93.8477	71.4779	96	80525	6451	32	33	1616	856	23	0
BPS10T	TpB	No_UV	104525186	87221962	0.113334	0.003807	59.97	51	98.2024	97.0432	94.5337	79.9211	60	89298	4595	4	127	860	39	13	0
BPS16T	TpB	No_UV	124919068	106435634	0.09795	0.004869	80.0655	70	97.8788	96.394	92.9335	74.1419	82	77837	6144	27	192	1450	523	43	1
BPS24T	TpB	No_UV	136786990	114118138	0.10292	0.004682	86.4362	76	97.9333	96.5478	93.2028	72.0554	160	79257	6866	62	51	669	25	13	0
UV560	TpB	UVA	110752706	94300684	0.109002	0.006466	65.998	56	97.1706	95.3485	88.9368	44.3593	192	81856	4945	104	496	1825	2062	88	1
UV564	TpB	UVA	117886726	102801461	0.107296	0.0071	74.2498	66	97.0304	95.1892	90.4355	63.9892	180	81664	5956	94	692	2349	3330	84	0
UV565	TpB	UVA	107275214	91241896	0.108069	0.006717	64.6886	56	97.067	95.3086	90.8428	66.5508	174	80834	5357	81	480	1853	2574	75	0
UV568	TpB	UVA	133935734	117121168	0.108084	0.008415	88.3111	77	96.5041	94.2908	87.7763	60.1952	159	66781	6709	66	453	2332	2637	62	1
UV574	TpB	UVA	151892632	127068924	0.104855	0.007529	95.238	82	96.7037	94.6178	88.213	66.0928	150	69319	6929	11	201	1629	171	42	2
BPS1T	TpB	UVB	122931918	102284312	0.100929	0.004482	77.1961	67	98.0107	96.6603	93.4833	78.2329	81	80754	6206	16	487	1674	2862	2063	72
BPS6T	TpB	UVB	101558840	88369181	0.098416	0.005178	68.263	59	97.8381	96.4007	92.882	74.8151	116	81078	5504	18	449	1761	2414	1587	56
BPS14T	TpB	UVB	111479674	94715921	0.098019	0.004706	72.6059	65	97.9872	96.6988	93.8591	72.9498	89	78830	5889	49	281	1506	1659	849	24
BPS18T	TpB	UVB	91300324	77007709	0.099327	0.004547	58.6727	53	98.03	96.7526	93.9045	73.7593	83	83220	5385	28	233	1342	993	524	11
BPS27T	TpB	UVB	119990550	101928014	0.101265	0.004901	77.7788	66	97.8828	96.5116	93.4478	76.4032	87	76388	6123	7	133	1255	504	470	16
BPS28T	TpB	UVB	106795704	92465299	0.10147	0.004675	69.1871	60	98.0062	96.6597	93.3285	76.2641	65	80001	5375	4	146	994	685	657	21
UV46T	TpN	No_UV	104773080	86098026	0.101953	0.004473	63.8995	55	97.9584	96.6095	93.3406	58.7117	86	80764	5847	4	106	1085	47	24	0
UV47T	TpN	No_UV	105079546	87647944	0.106377	0.004495	64.649	56	97.9821	96.6581	93.6467	61.5293	78	86959	5988	4	109	1137	63	29	0
UV409T	TpN	No_UV	102469778	86432489	0.104953	0.00432	62.5028	50	98.0597	96.8213	94.1045	64.8518	91	87812	5490	9	195	987	65	38	1
WHN31T	TpN	No_UV	124444082	101997840	0.103344	0.004332	74.7865	65	98.0076	96.7048	93.7372	61.1118	63	81566	6232	7	120	1042	50	21	0
WHN37T	TpN	No_UV	107918954	90476314	0.099552	0.0047	69.0626	56	97.9463	96.616	93.8914	68.5482	78	85290	6229	7	114	1033	78	50	0
UV518	TpN	UVA	127187206	110039503	0.110931	0.007155	77.2887	67	96.919	95.0151	88.9756	61.3857	147	77236	5540	12	131	938	86	42	1
UV546	TpN	UVA	130945084	114034642	0.113051	0.006971	80.483	69	97.0125	95.0533	88.2076	58.7355	106	79976	5722	15	130	1001	89	49	1
UV547	TpN	UVA	127260988	99249630	0.107871	0.005713	68.7447	59	97.2106	95.392	90.0521	64.2028	157	82087	5417	16	150	932	92	51	1
UV551	TpN	UVA	135716482	114027390	0.108074	0.006843	81.462	70	96.9984	95.1226	89.1602	61.7945	116	76280	5714	14	127	883	82	43	1
UV577	TpN	UVA	117596142	97919402	0.107038	0.006551	68.6334	61	97.0663	95.2571	90.2195	58.2721	169	85096	5478	8	146	937	60	36	1
UV586	TpN	UVA	117692714	98622461	0.107301	0.006824	71.3186	61	96.9998	95.0962	89.0499	61.1644	169	76971	5514	19	141	1028	108	42	1
UV633	TpN	UVA	138390070	119573756	0.103054	0.007795	90.2677	80	96.7595	94.7226	88.4904	57.7685	159	73577	6825	15	148	1137	99	58	1
UV6T	TpN	UVB	117427918	98118516	0.101206	0.004292	65.7581	54	97.8779	96.4273	92.7193	39.001	103	98546	6680	59	507	1802	3421	204	2
UV21T	TpN	UVB	94610708	76656748	0.111231	0.003784	53.7125	44	98.1602	96.9603	94.2316	63.2398	102	95552	5545	48	513	1976	3188	176	3
UV35T	TpN	UVB	129263764	105480972	0.09892	0.00427	77.0936	68	98.0269	96.7173	93.6791	49.6893	104	95889	6650	18	235	1525	1515	548	12
UV227T	TpN	UVB	169554500	137385223	0.103488	0.004275	102.93	91	98.0519	96.6522	92.5198	16.0298	910	135065	21994	1366	4083	12205	55130	1691	18
UV229T	TpN	UVB	156150824	125556530	0.102339	0.004084	93.0179	78	98.0999	96.8453	94.0551	65.8276	53	86768	7004	9	114	1236	115	90	1
WHN30T	TpN	UVB	184194202	148757875	0.106524	0.004065	107.78	90	98.1048	96.8935	94.3085	73.6706	89	86129	7365	1	135	1233	116	75	0
WHN34T	TpN	UVB	107382834	90993021	0.113818	0.00395	63.8822	53	98.194	97.0205	94.4509	72.2269	94	91913	5163	3	162	1528	276	263	4
